# Supplementary material for: Inherent atomic mobility changes in carbocation intermediates during the sesterterpene cyclization cascade
Source: publisher site journal article supplement (doi:10.3762/bjoc.15.184), 2019-08-07
Supplement: Additional file 4 [file 1860-5397-15-184-S4.pdf]

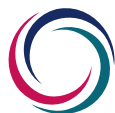

## Supporting Information

for

### **Inherent atomic mobility changes in carbocation intermediates during the sesterterpene cyclization cascade**

Hajime Sato, Takaaki Mitsuhashi, Mami Yamazaki, Ikuro Abe and Masanobu Uchiyama

*Beilstein J. Org. Chem.* **2019**, *15*, 1890–1897. [doi:10.3762/bjoc.15.184](https://doi.org/10.3762/bjoc.15.184)

### **How to use in house software to calculate inherent atomic mobility**

## **Table of Contents**

|                                                                            |    |
|----------------------------------------------------------------------------|----|
| 1. How to use in house software to calculate inherent atomic mobility..... | S2 |
|----------------------------------------------------------------------------|----|

## How to use in house software to calculate inherent atomic mobility

### 1. The preparation of input file.

In this study, all IRC calculations were carried out using GRRM11. The GRRM's log files need to be converted to appropriate format as shown in S1.log and S2.log.

### 2. Calculation of inherent atomic mobility.

Please compile S3.cpp as following.

```
g++ S3.cpp -o S3
```

Then, execute S3 as following.

```
./S3 [inputfile]
```

This software generates two csv files; *output\_all.csv* and *output\_carbon.csv*.

### 3. Analysis

Open the *output\_carbon.csv* and make heat map using Microsoft Excel.
