# Supplementary material for: Inherent atomic mobility changes in carbocation intermediates during the sesterterpene cyclization cascade
Source: Beilstein J Org Chem. 2019 Aug 7;15:1890–7. doi: 10.3762/bjoc.15.184 (PMC6693403; doi:10.3762/bjoc.15.184)
Supplement: File 1 — Coordinates and energies of quiannulatene biosynthesis. [file Beilstein_J_Org_Chem-15-1890-s001.log]

Entering Link 1

%mem=32TB
%nprocshared=3200
----------------------------------------------------------------------
# opt B3LYP/6-31G+** neb=nbeads=15
----------------------------------------------------------------------


IRC-IRC-IRC-IRC-IRC-IRC-IRC-IRC-IRC-IRC-IRC-IRC-IRC-IRC-IRC-IRC-IRC-IRC
IRC-IRC-IRC-IRC-IRC-IRC-IRC-IRC-IRC-IRC-IRC-IRC-IRC-IRC-IRC-IRC-IRC-IRC
                         Input orientation:
---------------------------------------------------------------------
Center     Atomic      Atomic             Coordinates (Angstroms)
Number     Number       Type             X           Y           Z
---------------------------------------------------------------------
1     6    0   	  -0.723273993731	  -2.588805388252	   0.187298720767
2     6    0   	   0.655489086022	  -2.422737951894	   0.721954417492
3     6    0   	   1.903859358489	  -1.308919962712	  -1.095326644068
4     6    0   	   1.374542908484	  -0.999892501704	   0.221411702019
5     6    0   	   0.347794898874	   0.136523970919	   0.352745554901
6     6    0   	   0.782379668708	   1.535433624463	  -0.127393324771
7     1    0   	   0.677352840935	  -2.326172778810	   1.808522784873
8     1    0   	   1.319325397693	  -3.248667894520	   0.450653723522
9     1    0   	   2.218204477759	  -0.890113226624	   0.914338223065
10    1    0   	  -0.562055241890	  -0.152907134061	  -0.172577552610
11    1    0   	   0.060350104061	   0.194543156931	   1.409033382893
12    1    0   	   1.590048226870	   1.916767958079	   0.506788543593
13    6    0   	   4.763792178832	  -0.372601829065	   0.211116158185
14    1    0   	   5.009506567819	  -1.192002627584	   0.888051380738
15    6    0   	   4.382926890005	  -0.801153062040	  -1.170924032275
16    1    0   	   4.112524994987	   0.037890611214	  -1.816697075655
17    1    0   	   5.233508886090	  -1.300778572563	  -1.650905438284
18    6    0   	   3.238637999791	  -1.917694691627	  -1.217642236421
19    1    0   	   3.438169255528	  -2.602596146128	  -0.386799668253
20    1    0   	   3.334176735047	  -2.457090312960	  -2.163470577224
21    6    0   	   1.133402786278	  -1.100753930997	  -2.342412068305
22    1    0   	   0.249652503613	  -0.476786981029	  -2.231095453234
23    1    0   	   1.784568743795	  -0.702829652462	  -3.131123245707
24    1    0   	   0.824735418480	  -2.093570134640	  -2.710464298083
25    6    0   	  -1.885048523567	  -2.592087695777	   0.879802019828
26    6    0   	  -1.985866598302	  -2.554541792240	   2.382791025535
27    1    0   	  -2.529205612792	  -3.439700420884	   2.736819737604
28    1    0   	  -1.019284683513	  -2.541670847813	   2.889125776360
29    1    0   	  -2.558300547301	  -1.685277899770	   2.722551091282
30    6    0   	  -0.405213343075	   2.500034018264	  -0.103276202626
31    6    0   	  -1.496733361001	   2.211892094459	  -0.835016692491
32    6    0   	  -0.258174814345	   3.700603674899	   0.797169418542
33    1    0   	   0.599317171495	   4.312977308423	   0.488893441090
34    1    0   	  -1.140780080652	   4.342184395403	   0.799838741994
35    1    0   	  -0.065298031297	   3.391902042577	   1.833457259212
36    6    0   	  -3.193668515003	  -2.704000717053	   0.122915218756
37    1    0   	  -3.611796660696	  -3.707278683073	   0.291701800086
38    1    0   	  -2.992678229153	  -2.624778809988	  -0.951067467547
39    6    0   	  -4.300485996620	  -1.679588558465	   0.511910636025
40    1    0   	  -5.133008532698	  -1.839090909176	  -0.179665099363
41    1    0   	  -4.687430469965	  -1.948224988697	   1.503460912175
42    6    0   	  -2.827312041000	   2.911149835354	  -0.868482168618
43    1    0   	  -2.741917008537	   3.950373375027	  -0.537057014826
44    1    0   	  -3.193566516992	   2.948546347279	  -1.901846787437
45    6    0   	  -3.907508972908	  -0.221067862426	   0.553200036250
46    1    0   	  -1.464382642868	   1.305382058942	  -1.441717175324
47    6    0   	  -4.228722995142	   0.767166898778	  -0.304325018790
48    1    0   	  -3.354295305182	   0.077481395089	   1.444511246847
49    6    0   	  -3.883100142289	   2.208675911770	   0.035227312086
50    1    0   	  -3.530309251197	   2.259279332133	   1.071092246767
51    1    0   	  -4.805962994641	   2.803976540107	  -0.013281836362
52    6    0   	  -4.997114429059	   0.566110568291	  -1.588823491718
53    1    0   	  -5.232225648599	  -0.481153869942	  -1.788702060026
54    1    0   	  -5.940836938150	   1.125983116996	  -1.566552155275
55    1    0   	  -4.432874635441	   0.946889162398	  -2.449470860591
56    6    0   	   4.933465140642	   0.884696964741	   0.671869991441
57    1    0   	   1.197740943138	   1.476446295303	  -1.143655676869
58    6    0   	   5.433384170210	   1.120820219445	   2.075586802942
59    1    0   	   6.379090976857	   1.676613767766	   2.058743696338
60    1    0   	   4.723764576218	   1.735018441761	   2.644264180099
61    1    0   	   5.597426991429	   0.187321529517	   2.619782684936
62    6    0   	   4.709994582368	   2.138450848050	  -0.134737906169
63    1    0   	   4.091003039790	   2.849881309200	   0.424375748990
64    1    0   	   5.668355572815	   2.641560118191	  -0.315909387889
65    1    0   	   4.239837070345	   1.966419830747	  -1.104878713453
66    1    0   	  -0.801662774669	  -2.694737237915	  -0.894544298325
---------------------------------------------------------------------
SCF Done:  E(scf) =  -977.111538912828     A.U.


IRC-IRC-IRC-IRC-IRC-IRC-IRC-IRC-IRC-IRC-IRC-IRC-IRC-IRC-IRC-IRC-IRC-IRC
IRC-IRC-IRC-IRC-IRC-IRC-IRC-IRC-IRC-IRC-IRC-IRC-IRC-IRC-IRC-IRC-IRC-IRC
                         Input orientation:
---------------------------------------------------------------------
Center     Atomic      Atomic             Coordinates (Angstroms)
Number     Number       Type             X           Y           Z
---------------------------------------------------------------------
1     6    0   	  -0.723203989856	  -2.588736052037	   0.187385152816
2     6    0   	   0.655563690241	  -2.422590845235	   0.722012424522
3     6    0   	   1.903827833143	  -1.308871454400	  -1.095397045144
4     6    0   	   1.374572349226	  -0.999773548547	   0.221350759533
5     6    0   	   0.347817452120	   0.136645850603	   0.352652997363
6     6    0   	   0.782327591526	   1.535508321181	  -0.127702014804
7     1    0   	   0.677442375454	  -2.325949889150	   1.808574203362
8     1    0   	   1.319417200301	  -3.248523803709	   0.450760271944
9     1    0   	   2.218268426519	  -0.889936004462	   0.914228035668
10    1    0   	  -0.562082918527	  -0.152850303792	  -0.172550609459
11    1    0   	   0.060479436825	   0.194781159763	   1.408964426925
12    1    0   	   1.590065277870	   1.916938128466	   0.506334337614
13    6    0   	   4.763868858586	  -0.372706586936	   0.211134995500
14    1    0   	   5.009682850354	  -1.192236416193	   0.887885435420
15    6    0   	   4.382864570657	  -0.801004617711	  -1.170951892808
16    1    0   	   4.112351078298	   0.038159864610	  -1.816531849725
17    1    0   	   5.233416945414	  -1.300492151316	  -1.651135990864
18    6    0   	   3.238624470889	  -1.917597983846	  -1.217755614314
19    1    0   	   3.438181084668	  -2.602550361085	  -0.386959013014
20    1    0   	   3.334175790829	  -2.456932782952	  -2.163618015619
21    6    0   	   1.133298561370	  -1.100800178147	  -2.342454658914
22    1    0   	   0.249426894965	  -0.477015161564	  -2.231087601761
23    1    0   	   1.784374667460	  -0.702671912955	  -3.131141889927
24    1    0   	   0.824849221400	  -2.093651045030	  -2.710589207538
25    6    0   	  -1.884969502987	  -2.592039867554	   0.879902247255
26    6    0   	  -1.985767194605	  -2.554443942200	   2.382892262494
27    1    0   	  -2.529024477521	  -3.439636915452	   2.736962587993
28    1    0   	  -1.019175551480	  -2.541477323699	   2.889207882423
29    1    0   	  -2.558265715116	  -1.685215917633	   2.722634294672
30    6    0   	  -0.405294173934	   2.500068619778	  -0.103556044595
31    6    0   	  -1.496782717232	   2.211925262871	  -0.835349959279
32    6    0   	  -0.258343155387	   3.700563941464	   0.797014210236
33    1    0   	   0.599096577307	   4.313045117175	   0.488793171444
34    1    0   	  -1.141002516545	   4.342070324429	   0.799764998630
35    1    0   	  -0.065429028099	   3.391769828549	   1.833273172721
36    6    0   	  -3.193594512767	  -2.704027588205	   0.123033654605
37    1    0   	  -3.611723679035	  -3.707288970629	   0.291917363191
38    1    0   	  -2.992612297888	  -2.624903359462	  -0.950957932042
39    6    0   	  -4.300401452030	  -1.679572807231	   0.511944544281
40    1    0   	  -5.132936502346	  -1.839126069354	  -0.179604168718
41    1    0   	  -4.687334150535	  -1.948118545559	   1.503526368966
42    6    0   	  -2.827395422690	   2.911125867906	  -0.868758064559
43    1    0   	  -2.742007796395	   3.950372197609	  -0.537397476618
44    1    0   	  -3.193735169352	   2.948452061462	  -1.902093960830
45    6    0   	  -3.907397679627	  -0.221057038534	   0.553108000068
46    1    0   	  -1.464369584785	   1.305460277580	  -1.442122991892
47    6    0   	  -4.228763912542	   0.767159877106	  -0.304382285428
48    1    0   	  -3.354019467930	   0.077510414270	   1.444312668806
49    6    0   	  -3.883084759702	   2.208676386551	   0.035086569074
50    1    0   	  -3.530171541769	   2.259303875581	   1.070910012696
51    1    0   	  -4.805949732045	   2.803981787694	  -0.013324047168
52    6    0   	  -4.997411438334	   0.566088146993	  -1.588726145341
53    1    0   	  -5.232472111234	  -0.481188751029	  -1.788598916200
54    1    0   	  -5.941182219292	   1.125871704643	  -1.566217061706
55    1    0   	  -4.433395400566	   0.946962473917	  -2.449476770416
56    6    0   	   4.933572187497	   0.884515597861	   0.672109392635
57    1    0   	   1.197554331344	   1.476404403629	  -1.144010774045
58    6    0   	   5.433680626455	   1.120383311720	   2.075808176900
59    1    0   	   6.379370021805	   1.676207224846	   2.058931179048
60    1    0   	   4.724126140169	   1.734456545094	   2.644707618000
61    1    0   	   5.597831659282	   0.186778305131	   2.619799382548
62    6    0   	   4.709972455771	   2.138419886951	  -0.134242770166
63    1    0   	   4.091109368715	   2.849775363397	   0.425116556887
64    1    0   	   5.668309579436	   2.641537590757	  -0.315521585283
65    1    0   	   4.239617743955	   1.966564121763	  -1.104324541770
66    1    0   	  -0.801602776725	  -2.694711699953	  -0.894453005180
---------------------------------------------------------------------
SCF Done:  E(scf) =  -977.111538911123     A.U.


IRC-IRC-IRC-IRC-IRC-IRC-IRC-IRC-IRC-IRC-IRC-IRC-IRC-IRC-IRC-IRC-IRC-IRC
Pt  1  Step number   1 out of a maximum of  2608
NET REACTION COORDINATE UP TO THIS POINT =    1.00000
IRC-IRC-IRC-IRC-IRC-IRC-IRC-IRC-IRC-IRC-IRC-IRC-IRC-IRC-IRC-IRC-IRC-IRC
                         Input orientation:
---------------------------------------------------------------------
Center     Atomic      Atomic             Coordinates (Angstroms)
Number     Number       Type             X           Y           Z
---------------------------------------------------------------------
1     6    0   	  -0.724037642502	  -2.589750785235	   0.187171695889
2     6    0   	   0.654504782748	  -2.424280766680	   0.722550352474
3     6    0   	   1.904117454944	  -1.310394665555	  -1.093583409945
4     6    0   	   1.374244137932	  -1.001357021256	   0.222896548806
5     6    0   	   0.347691917566	   0.135255899984	   0.353987141348
6     6    0   	   0.782903524190	   1.534157374984	  -0.125632637476
7     1    0   	   0.675904935065	  -2.328048473467	   1.809157665025
8     1    0   	   1.318248969381	  -3.250297906102	   0.451295199409
9     1    0   	   2.217507860394	  -0.891961144724	   0.916334845442
10    1    0   	  -0.561988532858	  -0.153722180929	  -0.171898780877
11    1    0   	   0.059745069936	   0.193074083144	   1.410151373890
12    1    0   	   1.590832058682	   1.914889104626	   0.508576358331
13    6    0   	   4.763371821050	  -0.370744574805	   0.210926199348
14    1    0   	   5.008986761143	  -1.188644506443	   0.889711642015
15    6    0   	   4.383083554862	  -0.802291460471	  -1.170353101652
16    1    0   	   4.112792531844	   0.035348753318	  -1.817990679927
17    1    0   	   5.233925503466	  -1.302801167149	  -1.648956846044
18    6    0   	   3.238983853589	  -1.919083790432	  -1.215321077876
19    1    0   	   3.438781131928	  -2.602905076580	  -0.383660169544
20    1    0   	   3.334493264838	  -2.459577812142	  -2.160535854805
21    6    0   	   1.134101502725	  -1.102408198036	  -2.340975590023
22    1    0   	   0.250413271251	  -0.478278621154	  -2.230059499853
23    1    0   	   1.785578443668	  -0.704740647811	  -3.129553287104
24    1    0   	   0.825372650127	  -2.095241576994	  -2.708918327721
25    6    0   	  -1.886177604231	  -2.592696562642	   0.879066228769
26    6    0   	  -1.987770450754	  -2.555478787285	   2.382009001627
27    1    0   	  -2.531510825108	  -3.440592978728	   2.735535009768
28    1    0   	  -1.021446041894	  -2.542978381849	   2.888847312850
29    1    0   	  -2.560165015714	  -1.686160673763	   2.721689347685
30    6    0   	  -0.404413285373	   2.499028406484	  -0.100924414979
31    6    0   	  -1.495167642380	   2.212504549049	  -0.834436206139
32    6    0   	  -0.258309388666	   3.697590257546	   0.802345001129
33    1    0   	   0.599431687150	   4.310716919617	   0.496268921865
34    1    0   	  -1.140974429320	   4.339089302602	   0.805618951958
35    1    0   	  -0.066403681830	   3.386592125498	   1.838129312908
36    6    0   	  -3.194431133700	  -2.703877640384	   0.121437954022
37    1    0   	  -3.613113245551	  -3.706996774562	   0.289790598425
38    1    0   	  -2.992807227600	  -2.624532244238	  -0.952416429973
39    6    0   	  -4.300994064925	  -1.679031956009	   0.510022789512
40    1    0   	  -5.133144286240	  -1.837903961821	  -0.182144723589
41    1    0   	  -4.688718234710	  -1.947796009666	   1.501236528838
42    6    0   	  -2.825625973849	   2.912035208031	  -0.867692603979
43    1    0   	  -2.740034992998	   3.951015078729	  -0.535530693565
44    1    0   	  -3.191648936650	   2.950256398645	  -1.901098337514
45    6    0   	  -3.907343756117	  -0.220714007862	   0.552076168652
46    1    0   	  -1.462178769926	   1.307248348361	  -1.442994938863
47    6    0   	  -4.227766803308	   0.768062109474	  -0.305122333543
48    1    0   	  -3.354405508700	   0.077196063736	   1.443772351150
49    6    0   	  -3.881783811605	   2.209265872806	   0.035347896291
50    1    0   	  -3.529208112059	   2.259138661232	   1.071322377921
51    1    0   	  -4.804478896042	   2.804846093344	  -0.012982370488
52    6    0   	  -4.995681361790	   0.567952319240	  -1.590051783638
53    1    0   	  -5.231133383410	  -0.479118174133	  -1.790544023431
54    1    0   	  -5.939186443464	   1.128197183804	  -1.567909983129
55    1    0   	  -4.430912912547	   0.948927367023	  -2.450263862123
56    6    0   	   4.932726485440	   0.887575482893	   0.668969702986
57    1    0   	   1.198000459599	   1.475327125772	  -1.141999059502
58    6    0   	   5.432117404695	   1.126869207850	   2.072343130845
59    1    0   	   6.377760509698	   1.682744019277	   2.054605216501
60    1    0   	   4.722218220233	   1.742230724768	   2.639413898165
61    1    0   	   5.596090623416	   0.194594192027	   2.618659047822
62    6    0   	   4.709433351813	   2.139540835774	  -0.140481585043
63    1    0   	   4.090138462466	   2.852131971156	   0.416815178587
64    1    0   	   5.667809526554	   2.642355118735	  -0.322388075082
65    1    0   	   4.239670150326	   1.965347409877	  -1.110430960287
66    1    0   	  -0.801923943862	  -2.695479541403	  -0.894723006032
---------------------------------------------------------------------
SCF Done:  E(scf) =  -977.111538874330     A.U.


IRC-IRC-IRC-IRC-IRC-IRC-IRC-IRC-IRC-IRC-IRC-IRC-IRC-IRC-IRC-IRC-IRC-IRC
Pt  2  Step number   1 out of a maximum of  2608
NET REACTION COORDINATE UP TO THIS POINT =    2.00000
IRC-IRC-IRC-IRC-IRC-IRC-IRC-IRC-IRC-IRC-IRC-IRC-IRC-IRC-IRC-IRC-IRC-IRC
                         Input orientation:
---------------------------------------------------------------------
Center     Atomic      Atomic             Coordinates (Angstroms)
Number     Number       Type             X           Y           Z
---------------------------------------------------------------------
1     6    0   	  -0.724617089609	  -2.590425113480	   0.186942465601
2     6    0   	   0.653774056224	  -2.425436697675	   0.722832236790
3     6    0   	   1.904395493288	  -1.311453278484	  -1.092384306791
4     6    0   	   1.374019923394	  -1.002435770237	   0.223873850088
5     6    0   	   0.347587239491	   0.134296059093	   0.354758063707
6     6    0   	   0.783303917550	   1.533247562043	  -0.124261322308
7     1    0   	   0.674849448604	  -2.329495800140	   1.809471285065
8     1    0   	   1.317435471047	  -3.251513874360	   0.451564695403
9     1    0   	   2.216952053842	  -0.893324703830	   0.917738150462
10    1    0   	  -0.561892706628	  -0.154321432420	  -0.171684541925
11    1    0   	   0.059124361930	   0.191860775594	   1.410796214988
12    1    0   	   1.591341816837	   1.913455114776	   0.510122448009
13    6    0   	   4.762958568462	  -0.369429748488	   0.210947884051
14    1    0   	   5.008252886087	  -1.186135753703	   0.891298682271
15    6    0   	   4.383383098179	  -0.803371806050	  -1.169797741577
16    1    0   	   4.113448762791	   0.033156649314	  -1.819027038349
17    1    0   	   5.234467613998	  -1.304739919911	  -1.647079248870
18    6    0   	   3.239284971411	  -1.920198926614	  -1.213586209836
19    1    0   	   3.439129669112	  -2.603252720096	  -0.381306227254
20    1    0   	   3.334803884343	  -2.461506253881	  -2.158346127399
21    6    0   	   1.134835437568	  -1.103483767606	  -2.340062465849
22    1    0   	   0.251328755458	  -0.479024985425	  -2.229531172914
23    1    0   	   1.786676148127	  -0.706230851642	  -3.128540053736
24    1    0   	   0.825828888826	  -2.096286073028	  -2.707855299169
25    6    0   	  -1.887004694188	  -2.593161591678	   0.878427452607
26    6    0   	  -1.989117448481	  -2.556268263694	   2.381341576577
27    1    0   	  -2.533166178592	  -3.441353973166	   2.734466795455
28    1    0   	  -1.022967773406	  -2.544091186697	   2.888523222248
29    1    0   	  -2.561451771756	  -1.686913771731	   2.721025994884
30    6    0   	  -0.403795836804	   2.498348889575	  -0.099140861082
31    6    0   	  -1.494121933807	   2.212884081553	  -0.833737741073
32    6    0   	  -0.258154153812	   3.695690695199	   0.805894119355
33    1    0   	   0.599790583036	   4.309242937300	   0.501147006165
34    1    0   	  -1.140806534502	   4.337209263507	   0.809557200581
35    1    0   	  -0.066853666217	   3.383259107128	   1.841391986388
36    6    0   	  -3.195017047415	  -2.703769256181	   0.120297488964
37    1    0   	  -3.614064282372	  -3.706803283311	   0.288250570649
38    1    0   	  -2.992974628959	  -2.624221804374	  -0.953463454672
39    6    0   	  -4.301416241445	  -1.678683851744	   0.508727415902
40    1    0   	  -5.133320484207	  -1.837070662363	  -0.183848627125
41    1    0   	  -4.689653710207	  -1.947641242741	   1.499689567576
42    6    0   	  -2.824462666005	   2.912663906441	  -0.866840119057
43    1    0   	  -2.738711295361	   3.951454121660	  -0.534111235672
44    1    0   	  -3.190297320362	   2.951520970958	  -1.900284302018
45    6    0   	  -3.907331313039	  -0.220499949629	   0.551432809825
46    1    0   	  -1.460822880442	   1.308388640895	  -1.443470542631
47    6    0   	  -4.227139726321	   0.768688775528	  -0.305521738211
48    1    0   	  -3.354661677184	   0.076928227482	   1.443456962382
49    6    0   	  -3.880925415302	   2.209666629187	   0.035663278838
50    1    0   	  -3.528550721454	   2.258992596262	   1.071732826549
51    1    0   	  -4.803498138641	   2.805447576574	  -0.012572319884
52    6    0   	  -4.994604485041	   0.569281976947	  -1.590829572045
53    1    0   	  -5.230334420525	  -0.477640448940	  -1.791771467128
54    1    0   	  -5.937927775087	   1.129842372909	  -1.568882448441
55    1    0   	  -4.429354610470	   0.950355567977	  -2.450683357549
56    6    0   	   4.932080487702	   0.889705969214	   0.666832148776
57    1    0   	   1.198355543081	   1.474665605949	  -1.140654456889
58    6    0   	   5.430731442407	   1.131524490222	   2.070050921360
59    1    0   	   6.376416931591	   1.687314095729	   2.051816484741
60    1    0   	   4.720561858057	   1.747961829547	   2.635623532592
61    1    0   	   5.594357148164	   0.200229395641	   2.618159311051
62    6    0   	   4.709240438972	   2.140245335036	  -0.144978832924
63    1    0   	   4.089535050682	   2.853789867124	   0.410651494716
64    1    0   	   5.667704963742	   2.642795927001	  -0.327150638301
65    1    0   	   4.240118433716	   1.964325917843	  -1.114935479552
66    1    0   	  -0.802162575367	  -2.695937526405	  -0.894995489316
---------------------------------------------------------------------
SCF Done:  E(scf) =  -977.111538801157     A.U.


IRC-IRC-IRC-IRC-IRC-IRC-IRC-IRC-IRC-IRC-IRC-IRC-IRC-IRC-IRC-IRC-IRC-IRC
Pt  3  Step number   1 out of a maximum of  2608
NET REACTION COORDINATE UP TO THIS POINT =    3.00000
IRC-IRC-IRC-IRC-IRC-IRC-IRC-IRC-IRC-IRC-IRC-IRC-IRC-IRC-IRC-IRC-IRC-IRC
                         Input orientation:
---------------------------------------------------------------------
Center     Atomic      Atomic             Coordinates (Angstroms)
Number     Number       Type             X           Y           Z
---------------------------------------------------------------------
1     6    0   	  -0.725781805414	  -2.591892129940	   0.186739058749
2     6    0   	   0.652280942481	  -2.427825065007	   0.723702375208
3     6    0   	   1.904767970064	  -1.313680163680	  -1.089762392358
4     6    0   	   1.373556306754	  -1.004682478243	   0.226113785170
5     6    0   	   0.347408234110	   0.132326619927	   0.356683059351
6     6    0   	   0.784068331116	   1.531312571107	  -0.121420774217
7     1    0   	   0.672669532118	  -2.332405273706	   1.810401573673
8     1    0   	   1.315801087956	  -3.254025664188	   0.452477287305
9     1    0   	   2.215887104515	  -0.896172318893	   0.920753995659
10    1    0   	  -0.561795998040	  -0.155569927272	  -0.170663180947
11    1    0   	   0.058147818957	   0.189499122150	   1.412528487897
12    1    0   	   1.592494209329	   1.910558861533	   0.513040097586
13    6    0   	   4.762251166597	  -0.366595940535	   0.210567002452
14    1    0   	   5.007310489650	  -1.180967443130	   0.893807505041
15    6    0   	   4.383634515694	  -0.805184863390	  -1.168999511945
16    1    0   	   4.113953507282	   0.029157685868	  -1.821145982128
17    1    0   	   5.235123961074	  -1.307977301318	  -1.644073992698
18    6    0   	   3.239774439374	  -1.922331884350	  -1.210102071668
19    1    0   	   3.440008012695	  -2.603739309114	  -0.376575246063
20    1    0   	   3.335221313752	  -2.465322442516	  -2.153920144217
21    6    0   	   1.135881405896	  -1.105932233844	  -2.337898970140
22    1    0   	   0.252524593011	  -0.481147845016	  -2.227974468737
23    1    0   	   1.788220167077	  -0.709155446880	  -3.126194582553
24    1    0   	   0.826680498453	  -2.098745054744	  -2.705486921134
25    6    0   	  -1.888711549941	  -2.594069907129	   0.877321056862
26    6    0   	  -1.991979133432	  -2.557631245653	   2.380164265812
27    1    0   	  -2.536713313260	  -3.442590573518	   2.732554463570
28    1    0   	  -1.026217339829	  -2.546082781429	   2.888103481108
29    1    0   	  -2.564177697543	  -1.688135365362	   2.719705696278
30    6    0   	  -0.402634507059	   2.496787703999	  -0.095317607943
31    6    0   	  -1.491707967867	   2.213924031329	  -0.832740118239
32    6    0   	  -0.258575416310	   3.690838716270	   0.814248732150
33    1    0   	   0.599796168301	   4.305550146808	   0.513147795369
34    1    0   	  -1.141314227233	   4.332236961569	   0.818790333074
35    1    0   	  -0.068947316893	   3.374704469005	   1.848909281137
36    6    0   	  -3.196181682161	  -2.703546290528	   0.118091188914
37    1    0   	  -3.616058412158	  -3.706348525093	   0.285355116256
38    1    0   	  -2.993199824776	  -2.623772686565	  -0.955476035417
39    6    0   	  -4.302199139557	  -1.677830427270	   0.505955858845
40    1    0   	  -5.133534271816	  -1.835244943540	  -0.187526160431
41    1    0   	  -4.691616220819	  -1.947027762752	   1.496392411737
42    6    0   	  -2.821888883189	   2.914079830564	  -0.865501120595
43    1    0   	  -2.735872295972	   3.952484448601	  -0.531599051903
44    1    0   	  -3.187347450228	   2.954240039573	  -1.899013320837
45    6    0   	  -3.907132518096	  -0.219943126268	   0.549876910857
46    1    0   	  -1.457324944161	   1.311500230489	  -1.445473461429
47    6    0   	  -4.225569884678	   0.770031148551	  -0.306684737289
48    1    0   	  -3.355084958562	   0.076556621060	   1.442595466174
49    6    0   	  -3.878923059995	   2.210564290886	   0.035919199162
50    1    0   	  -3.526953863588	   2.258803371993	   1.072179031445
51    1    0   	  -4.801276981565	   2.806709280950	  -0.012116186799
52    6    0   	  -4.991988605248	   0.571984491451	  -1.592825652687
53    1    0   	  -5.228310658195	  -0.474641572045	  -1.794621129191
54    1    0   	  -5.934913314433	   1.133235305056	  -1.571425382954
55    1    0   	  -4.425647189555	   0.953155483803	  -2.451919150860
56    6    0   	   4.930881344049	   0.894104621518	   0.662255978216
57    1    0   	   1.198716914683	   1.473066743379	  -1.137976541640
58    6    0   	   5.428582686401	   1.140818774042	   2.064977107548
59    1    0   	   6.374184933125	   1.696706881547	   2.045462772564
60    1    0   	   4.717936535806	   1.759067268663	   2.627982961688
61    1    0   	   5.592013378190	   0.211426946210	   2.616385134136
62    6    0   	   4.708416663615	   2.141868813951	  -0.153961512439
63    1    0   	   4.088136076856	   2.857173821319	   0.398767364542
64    1    0   	   5.666922747991	   2.643986446152	  -0.337099560310
65    1    0   	   4.240066796748	   1.962612407790	  -1.123690320028
66    1    0   	  -0.802584463613	  -2.697116282786	  -0.895273751849
---------------------------------------------------------------------
SCF Done:  E(scf) =  -977.111538547332     A.U.


IRC-IRC-IRC-IRC-IRC-IRC-IRC-IRC-IRC-IRC-IRC-IRC-IRC-IRC-IRC-IRC-IRC-IRC
Pt  4  Step number   1 out of a maximum of  2608
NET REACTION COORDINATE UP TO THIS POINT =    4.00000
IRC-IRC-IRC-IRC-IRC-IRC-IRC-IRC-IRC-IRC-IRC-IRC-IRC-IRC-IRC-IRC-IRC-IRC
                         Input orientation:
---------------------------------------------------------------------
Center     Atomic      Atomic             Coordinates (Angstroms)
Number     Number       Type             X           Y           Z
---------------------------------------------------------------------
1     6    0   	  -0.727145725181	  -2.593568781571	   0.186414715846
2     6    0   	   0.650525335298	  -2.430605143637	   0.724654680815
3     6    0   	   1.905243019431	  -1.316215977732	  -1.086694240785
4     6    0   	   1.373019158176	  -1.007293055032	   0.228733348431
5     6    0   	   0.347215607031	   0.130046952070	   0.358949382214
6     6    0   	   0.785012507917	   1.529074143855	  -0.118024138790
7     1    0   	   0.670093025124	  -2.335838538403	   1.811426152662
8     1    0   	   1.313877909056	  -3.256945345585	   0.453458134193
9     1    0   	   2.214629807492	  -0.899520673839	   0.924302181249
10    1    0   	  -0.561649264402	  -0.157004694560	  -0.169470571923
11    1    0   	   0.056999931047	   0.186741309228	   1.414560883922
12    1    0   	   1.593808790459	   1.907189551377	   0.516633836028
13    6    0   	   4.761435030782	  -0.363320084554	   0.210186352435
14    1    0   	   5.006194020825	  -1.174946808930	   0.896790029690
15    6    0   	   4.383992774496	  -0.807323657432	  -1.167986360873
16    1    0   	   4.114671876501	   0.024448724267	  -1.823542957226
17    1    0   	   5.235960159821	  -1.311791822293	  -1.640423923557
18    6    0   	   3.240372010411	  -1.924790659942	  -1.206009415084
19    1    0   	   3.441014148633	  -2.604303431899	  -0.371047668781
20    1    0   	   3.335741329365	  -2.469718846389	  -2.148736683818
21    6    0   	   1.137190034053	  -1.108648096497	  -2.335380207811
22    1    0   	   0.254074029339	  -0.483389392768	  -2.226184306693
23    1    0   	   1.790160223692	  -0.712519122207	  -3.123462692227
24    1    0   	   0.827647337088	  -2.101444610629	  -2.702711678320
25    6    0   	  -1.890711749443	  -2.595160476399	   0.875933490397
26    6    0   	  -1.995338641308	  -2.559350215027	   2.378692776410
27    1    0   	  -2.540847512032	  -3.444198631117	   2.730164346362
28    1    0   	  -1.030035384753	  -2.548539050792	   2.887522037870
29    1    0   	  -2.567406656349	  -1.689727642640	   2.718118491370
30    6    0   	  -0.401189557422	   2.495050205268	  -0.090931809160
31    6    0   	  -1.489004766726	   2.214938795972	  -0.831255520053
32    6    0   	  -0.258607207724	   3.685774299062	   0.823232920865
33    1    0   	   0.600247031335	   4.301599466232	   0.525789077080
34    1    0   	  -1.141377244822	   4.327128296772	   0.828688825716
35    1    0   	  -0.070670815753	   3.365879340197	   1.857055996688
36    6    0   	  -3.197539871412	  -2.703304037419	   0.115409032365
37    1    0   	  -3.618343044658	  -3.705863582060	   0.281789954716
38    1    0   	  -2.993460699315	  -2.623178215770	  -0.957923193030
39    6    0   	  -4.303154718422	  -1.676926735085	   0.502689058904
40    1    0   	  -5.133822601317	  -1.833200393688	  -0.191849190537
41    1    0   	  -4.693926358958	  -1.946478955550	   1.492497018198
42    6    0   	  -2.818942091537	   2.915621112499	  -0.863725283391
43    1    0   	  -2.732597393191	   3.953572815000	  -0.528467518582
44    1    0   	  -3.183888318035	   2.957291276828	  -1.897342706224
45    6    0   	  -3.907002879298	  -0.219376297817	   0.548106411863
46    1    0   	  -1.453612035920	   1.314596637378	  -1.447032957346
47    6    0   	  -4.223881859764	   0.771543267743	  -0.307941107801
48    1    0   	  -3.355674132355	   0.076011564683	   1.441635734034
49    6    0   	  -3.876731908326	   2.211545765914	   0.036356742739
50    1    0   	  -3.525307205465	   2.258505717982	   1.072859697810
51    1    0   	  -4.798808049944	   2.808142513769	  -0.011510975745
52    6    0   	  -4.989096623928	   0.575125977848	  -1.595044276223
53    1    0   	  -5.226064214631	  -0.471150247816	  -1.797895452152
54    1    0   	  -5.931580064433	   1.137138248829	  -1.574223060761
55    1    0   	  -4.421520947642	   0.956487859737	  -2.453237767483
56    6    0   	   4.929465279474	   0.899177338555	   0.656979158429
57    1    0   	   1.199352538972	   1.471235909023	  -1.134709218114
58    6    0   	   5.426001912308	   1.151605868821	   2.059101274642
59    1    0   	   6.371502680101	   1.707612913307	   2.038126790287
60    1    0   	   4.714775434412	   1.771940761896	   2.619070794920
61    1    0   	   5.589189254418	   0.224461552882	   2.614353035851
62    6    0   	   4.707452015846	   2.143673103765	  -0.164360159198
63    1    0   	   4.086462119204	   2.860988544877	   0.384949901274
64    1    0   	   5.666001964639	   2.645308377153	  -0.348579570408
65    1    0   	   4.240049063814	   1.960519992846	  -1.133818477743
66    1    0   	  -0.803070052339	  -2.698389252706	  -0.895691384849
---------------------------------------------------------------------
SCF Done:  E(scf) =  -977.111538064883     A.U.


IRC-IRC-IRC-IRC-IRC-IRC-IRC-IRC-IRC-IRC-IRC-IRC-IRC-IRC-IRC-IRC-IRC-IRC
Pt  5  Step number   1 out of a maximum of  2608
NET REACTION COORDINATE UP TO THIS POINT =    5.00000
IRC-IRC-IRC-IRC-IRC-IRC-IRC-IRC-IRC-IRC-IRC-IRC-IRC-IRC-IRC-IRC-IRC-IRC
                         Input orientation:
---------------------------------------------------------------------
Center     Atomic      Atomic             Coordinates (Angstroms)
Number     Number       Type             X           Y           Z
---------------------------------------------------------------------
1     6    0   	  -0.728481569986	  -2.595232942106	   0.186131061165
2     6    0   	   0.648791737191	  -2.433346010347	   0.725649097138
3     6    0   	   1.905708314225	  -1.318752558663	  -1.083617587264
4     6    0   	   1.372492785792	  -1.009870649666	   0.231359689167
5     6    0   	   0.347030685450	   0.127800468446	   0.361214218318
6     6    0   	   0.785923967863	   1.526853265933	  -0.114717716950
7     1    0   	   0.667533960944	  -2.339199505665	   1.812489457537
8     1    0   	   1.311987560019	  -3.259825615539	   0.454507255967
9     1    0   	   2.213389027276	  -0.902821266436	   0.927845250198
10    1    0   	  -0.561518069466	  -0.158427580881	  -0.168227436725
11    1    0   	   0.055908630883	   0.184059986683	   1.416602613507
12    1    0   	   1.595146042515	   1.903870821769	   0.520044968973
13    6    0   	   4.760626409891	  -0.360053124159	   0.209781442615
14    1    0   	   5.005104898477	  -1.168931079898	   0.899720689289
15    6    0   	   4.384340168703	  -0.809451153984	  -1.166977258969
16    1    0   	   4.115365277465	   0.019745577250	  -1.825919235061
17    1    0   	   5.236782113060	  -1.315570076257	  -1.636791875607
18    6    0   	   3.240966442040	  -1.927235811169	  -1.201917016761
19    1    0   	   3.442023392336	  -2.604851285963	  -0.365525877867
20    1    0   	   3.336256319031	  -2.474102141528	  -2.143548202206
21    6    0   	   1.138464425078	  -1.111409821047	  -2.332845055799
22    1    0   	   0.255523804771	  -0.485774475818	  -2.224357076962
23    1    0   	   1.792029023615	  -0.715814791494	  -3.120689747433
24    1    0   	   0.828702273218	  -2.104206624032	  -2.699973889586
25    6    0   	  -1.892685707233	  -2.596234958316	   0.874580423897
26    6    0   	  -1.998680487324	  -2.561028722845	   2.377253345299
27    1    0   	  -2.544945287237	  -3.445772191737	   2.727817338562
28    1    0   	  -1.033839455732	  -2.550925523676	   2.886976651542
29    1    0   	  -2.570638946112	  -1.691286979282	   2.716546785528
30    6    0   	  -0.399797126838	   2.493295001389	  -0.086562330119
31    6    0   	  -1.486277045268	   2.216043212563	  -0.829907061199
32    6    0   	  -0.258840508506	   3.680481010553	   0.832439096933
33    1    0   	   0.600493969113	   4.297492899231	   0.538879508742
34    1    0   	  -1.141669942649	   4.321750137486	   0.838849263938
35    1    0   	  -0.072690747174	   3.356622564093	   1.865352788375
36    6    0   	  -3.198864166169	  -2.703060561074	   0.112755671538
37    1    0   	  -3.620604931405	  -3.705366615979	   0.278280573104
38    1    0   	  -2.993678331263	  -2.622617803020	  -0.960341268232
39    6    0   	  -4.304065127713	  -1.675996345065	   0.499411925717
40    1    0   	  -5.134056875558	  -1.831131950501	  -0.196188493707
41    1    0   	  -4.696208279848	  -1.945873280895	   1.488590987817
42    6    0   	  -2.816000347271	   2.917204127635	  -0.862022848659
43    1    0   	  -2.729341467389	   3.954701754927	  -0.525404985463
44    1    0   	  -3.180478045871	   2.960385802028	  -1.895726475076
45    6    0   	  -3.906807678396	  -0.218789992706	   0.546301727216
46    1    0   	  -1.449769057380	   1.317922296046	  -1.448890527968
47    6    0   	  -4.222148931855	   0.773073997956	  -0.309221532085
48    1    0   	  -3.356167072855	   0.075484513253	   1.440621212113
49    6    0   	  -3.874489739228	   2.212543536969	   0.036764092796
50    1    0   	  -3.523559662301	   2.258217563136	   1.073492029941
51    1    0   	  -4.796298133551	   2.809580869613	  -0.010881853755
52    6    0   	  -4.986201481547	   0.578289670868	  -1.597259335380
53    1    0   	  -5.223821775914	  -0.467634620809	  -1.801161076706
54    1    0   	  -5.928241076552	   1.141064556407	  -1.576983169610
55    1    0   	  -4.417420452127	   0.959841850879	  -2.454569760451
56    6    0   	   4.928050072247	   0.904217931808	   0.651689917999
57    1    0   	   1.199849352071	   1.469384773343	  -1.131570673052
58    6    0   	   5.423446520852	   1.162341711997	   2.053185127620
59    1    0   	   6.368835416475	   1.718481266094	   2.030739301654
60    1    0   	   4.711641798173	   1.784727563263	   2.610137329810
61    1    0   	   5.586417696171	   0.237452001607	   2.612251539403
62    6    0   	   4.706453302292	   2.145438439250	  -0.174730562326
63    1    0   	   4.084761160561	   2.864732342842	   0.371183497261
64    1    0   	   5.665035597972	   2.646605213058	  -0.360046449830
65    1    0   	   4.239973349338	   1.958401844117	  -1.143893895764
66    1    0   	  -0.803521125920	  -2.699670206463	  -0.896065844279
---------------------------------------------------------------------
SCF Done:  E(scf) =  -977.111537374005     A.U.


IRC-IRC-IRC-IRC-IRC-IRC-IRC-IRC-IRC-IRC-IRC-IRC-IRC-IRC-IRC-IRC-IRC-IRC
Pt  6  Step number   1 out of a maximum of  2608
NET REACTION COORDINATE UP TO THIS POINT =    6.00000
IRC-IRC-IRC-IRC-IRC-IRC-IRC-IRC-IRC-IRC-IRC-IRC-IRC-IRC-IRC-IRC-IRC-IRC
                         Input orientation:
---------------------------------------------------------------------
Center     Atomic      Atomic             Coordinates (Angstroms)
Number     Number       Type             X           Y           Z
---------------------------------------------------------------------
1     6    0   	  -0.729806352553	  -2.596890941154	   0.185858170795
2     6    0   	   0.647059978822	  -2.436074469611	   0.726669684717
3     6    0   	   1.906174075754	  -1.321285330322	  -1.080509601026
4     6    0   	   1.371970964764	  -1.012437217789	   0.234015616277
5     6    0   	   0.346853351873	   0.125568368448	   0.363509929054
6     6    0   	   0.786828968846	   1.524637621964	  -0.111418812881
7     1    0   	   0.664963324903	  -2.342540215942	   1.813577549669
8     1    0   	   1.310105839710	  -3.262692320356	   0.455595733652
9     1    0   	   2.212150274525	  -0.906115926976	   0.931418445802
10    1    0   	  -0.561390447930	  -0.159844412755	  -0.166926734772
11    1    0   	   0.054849974066	   0.181412796395	   1.418680208771
12    1    0   	   1.596493718687	   1.900573496060	   0.523415223390
13    6    0   	   4.759828904877	  -0.356782133055	   0.209360647851
14    1    0   	   5.004044241790	  -1.162891342711	   0.902625085760
15    6    0   	   4.384690068461	  -0.811582101400	  -1.165955506691
16    1    0   	   4.116058593297	   0.015019274142	  -1.828277966139
17    1    0   	   5.237603738521	  -1.319342390769	  -1.633140985024
18    6    0   	   3.241562783770	  -1.929673977491	  -1.197796243126
19    1    0   	   3.443036510444	  -2.605384687965	  -0.359977072368
20    1    0   	   3.336767793946	  -2.478483989931	  -2.138323452338
21    6    0   	   1.139733890835	  -1.114178117132	  -2.330276469664
22    1    0   	   0.256941439481	  -0.488207699328	  -2.222486793353
23    1    0   	   1.793880274042	  -0.719063460207	  -3.117867005354
24    1    0   	   0.829804946621	  -2.106979056860	  -2.697234349941
25    6    0   	  -1.894655555858	  -2.597310205839	   0.873223316626
26    6    0   	  -2.002037616928	  -2.562713035251	   2.375806974396
27    1    0   	  -2.549046628283	  -3.447361293032	   2.725453024326
28    1    0   	  -1.037666393158	  -2.553303263237	   2.886435432587
29    1    0   	  -2.573905475080	  -1.692863169503	   2.714964160062
30    6    0   	  -0.398414823819	   2.491536631404	  -0.082187801118
31    6    0   	  -1.483541459309	   2.217167603945	  -0.828565314764
32    6    0   	  -0.259115902164	   3.675139592247	   0.841677001865
33    1    0   	   0.600694208667	   4.293340538750	   0.552041104341
34    1    0   	  -1.142010692474	   4.316314172600	   0.849044630276
35    1    0   	  -0.074767948324	   3.347290031539	   1.873659021871
36    6    0   	  -3.200171532398	  -2.702819149504	   0.110081908011
37    1    0   	  -3.622853025869	  -3.704869250040	   0.274746692030
38    1    0   	  -2.993863803208	  -2.622063090200	  -0.962775721230
39    6    0   	  -4.304959925616	  -1.675064005831	   0.496097156759
40    1    0   	  -5.134262778227	  -1.829057398766	  -0.200577114435
41    1    0   	  -4.698491180811	  -1.945262844430	   1.484639209369
42    6    0   	  -2.813056497957	   2.918796909265	  -0.860316788852
43    1    0   	  -2.726089464242	   3.955836869174	  -0.522332390967
44    1    0   	  -3.177069280245	   2.963495391323	  -1.894102378849
45    6    0   	  -3.906592717816	  -0.218205962544	   0.544468323732
46    1    0   	  -1.445894595917	   1.321298045674	  -1.450774499342
47    6    0   	  -4.220407348392	   0.774611222217	  -0.310512197219
48    1    0   	  -3.356627729059	   0.074944308737	   1.439571160060
49    6    0   	  -3.872236883704	   2.213541714069	   0.037174309040
50    1    0   	  -3.521793771217	   2.257918299876	   1.074123151230
51    1    0   	  -4.793778236712	   2.811019223369	  -0.010234549049
52    6    0   	  -4.983314374793	   0.581476991252	  -1.599473324444
53    1    0   	  -5.221582632032	  -0.464091793289	  -1.804440707011
54    1    0   	  -5.924912166601	   1.145008307034	  -1.579716398722
55    1    0   	  -4.413344595715	   0.963236356606	  -2.455901325181
56    6    0   	   4.926632138554	   0.909247348849	   0.646370426663
57    1    0   	   1.200308186021	   1.467519592653	  -1.128450566201
58    6    0   	   5.420902397229	   1.173079262220	   2.047206338583
59    1    0   	   6.366166892577	   1.729367728234	   2.023271242038
60    1    0   	   4.708515380662	   1.797489054771	   2.601141772983
61    1    0   	   5.583684316135	   0.250465341786	   2.610078892959
62    6    0   	   4.705417583661	   2.147165788212	  -0.185117207574
63    1    0   	   4.083019606476	   2.868411876536	   0.357402048062
64    1    0   	   5.664019115971	   2.647880042733	  -0.371546040061
65    1    0   	   4.239847534926	   1.956235672853	  -1.153960329101
66    1    0   	  -0.803947298905	  -2.700944017823	  -0.896429494919
---------------------------------------------------------------------
SCF Done:  E(scf) =  -977.111536466893     A.U.


IRC-IRC-IRC-IRC-IRC-IRC-IRC-IRC-IRC-IRC-IRC-IRC-IRC-IRC-IRC-IRC-IRC-IRC
Pt  7  Step number   1 out of a maximum of  2608
NET REACTION COORDINATE UP TO THIS POINT =    7.00000
IRC-IRC-IRC-IRC-IRC-IRC-IRC-IRC-IRC-IRC-IRC-IRC-IRC-IRC-IRC-IRC-IRC-IRC
                         Input orientation:
---------------------------------------------------------------------
Center     Atomic      Atomic             Coordinates (Angstroms)
Number     Number       Type             X           Y           Z
---------------------------------------------------------------------
1     6    0   	  -0.731118392325	  -2.598543149621	   0.185602160367
2     6    0   	   0.645332347958	  -2.438788565116	   0.727720292656
3     6    0   	   1.906638297473	  -1.323815074647	  -1.077371036640
4     6    0   	   1.371454018383	  -1.014990370502	   0.236700498468
5     6    0   	   0.346682225424	   0.123351692612	   0.365834977639
6     6    0   	   0.787721767635	   1.522429132793	  -0.108132997928
7     1    0   	   0.662385192511	  -2.345855885998	   1.814694112776
8     1    0   	   1.308235489717	  -3.265543359255	   0.456728246377
9     1    0   	   2.210914916497	  -0.909399762649	   0.935019696812
10    1    0   	  -0.561268666993	  -0.161255334153	  -0.165568781894
11    1    0   	   0.053824130009	   0.178801505933	   1.420792792854
12    1    0   	   1.597849814780	   1.897302040445	   0.526732950165
13    6    0   	   4.759043183570	  -0.353507858264	   0.208919883966
14    1    0   	   5.003012066885	  -1.156829056735	   0.905499110663
15    6    0   	   4.385040434720	  -0.813716653878	  -1.164925138169
16    1    0   	   4.116748268876	   0.010270322143	  -1.830622336406
17    1    0   	   5.238422039828	  -1.323108867888	  -1.629477443748
18    6    0   	   3.242159133765	  -1.932105687867	  -1.193649156337
19    1    0   	   3.444052873418	  -2.605903642556	  -0.354403019716
20    1    0   	   3.337272747390	  -2.482865717859	  -2.133064196735
21    6    0   	   1.140993946679	  -1.116956969436	  -2.327674290035
22    1    0   	   0.258317800965	  -0.490699710128	  -2.220571412810
23    1    0   	   1.795706602480	  -0.722261140083	  -3.114993193496
24    1    0   	   0.830959294538	  -2.109767275602	  -2.694496180841
25    6    0   	  -1.896618821452	  -2.598383046499	   0.871869674073
26    6    0   	  -2.005405759673	  -2.564393727945	   2.374361219391
27    1    0   	  -2.553147980832	  -3.448954508668	   2.723083271872
28    1    0   	  -1.041511261130	  -2.555661931170	   2.885904870514
29    1    0   	  -2.577200530823	  -1.694444682171	   2.713375233460
30    6    0   	  -0.397053009616	   2.489769630859	  -0.077805288166
31    6    0   	  -1.480789233572	   2.218329723224	  -0.827258770970
32    6    0   	  -0.259480133513	   3.669699102717	   0.851002150977
33    1    0   	   0.600807691507	   4.289101790171	   0.565389749738
34    1    0   	  -1.142448376610	   4.310766589082	   0.859327739854
35    1    0   	  -0.076985212413	   3.337785490210	   1.882017109480
36    6    0   	  -3.201460512974	  -2.702577802855	   0.107397131714
37    1    0   	  -3.625088678212	  -3.704367354461	   0.271203868837
38    1    0   	  -2.994016698510	  -2.621518599183	  -0.965217898028
39    6    0   	  -4.305833798635	  -1.674122128318	   0.492749752389
40    1    0   	  -5.134436308398	  -1.826970314696	  -0.205008305091
41    1    0   	  -4.700769448841	  -1.944633451158	   1.480648675313
42    6    0   	  -2.810108085875	   2.920407087749	  -0.858627971197
43    1    0   	  -2.722842204076	   3.956987054696	  -0.519272667503
44    1    0   	  -3.173666680216	   2.966624806131	  -1.892488766068
45    6    0   	  -3.906347898323	  -0.217617548746	   0.542603296178
46    1    0   	  -1.441955371696	   1.324772349770	  -1.452748969569
47    6    0   	  -4.218646982551	   0.776158884725	  -0.311819449357
48    1    0   	  -3.357042854099	   0.074400008051	   1.438480186862
49    6    0   	  -3.869961590054	   2.214545158691	   0.037575783106
50    1    0   	  -3.519989334830	   2.257614530571	   1.074738671506
51    1    0   	  -4.791238417740	   2.812460316934	  -0.009573434729
52    6    0   	  -4.980429514185	   0.584688073220	  -1.601689769389
53    1    0   	  -5.219344164080	  -0.460522023850	  -1.807732449459
54    1    0   	  -5.921586305082	   1.148971829592	  -1.582426095681
55    1    0   	  -4.409289061269	   0.966666394754	  -2.457239534111
56    6    0   	   4.925214634500	   0.914264983908	   0.641016619056
57    1    0   	   1.200713737981	   1.465642216465	  -1.125357880068
58    6    0   	   5.418374397992	   1.183817008361	   2.041160954064
59    1    0   	   6.363505848521	   1.740264327425	   2.015718323351
60    1    0   	   4.705405226671	   1.810229680826	   2.592078823578
61    1    0   	   5.580987758637	   0.263499695969	   2.607832804004
62    6    0   	   4.704349553197	   2.148855133281	  -0.195524616411
63    1    0   	   4.081238519005	   2.872026102413	   0.343598863660
64    1    0   	   5.662957154589	   2.649134759371	  -0.383078562153
65    1    0   	   4.239681050438	   1.954020811802	  -1.164024630364
66    1    0   	  -0.804348174663	  -2.702215139911	  -0.896775767334
---------------------------------------------------------------------
SCF Done:  E(scf) =  -977.111535336604     A.U.


IRC-IRC-IRC-IRC-IRC-IRC-IRC-IRC-IRC-IRC-IRC-IRC-IRC-IRC-IRC-IRC-IRC-IRC
Pt  8  Step number   1 out of a maximum of  2608
NET REACTION COORDINATE UP TO THIS POINT =    8.00000
IRC-IRC-IRC-IRC-IRC-IRC-IRC-IRC-IRC-IRC-IRC-IRC-IRC-IRC-IRC-IRC-IRC-IRC
                         Input orientation:
---------------------------------------------------------------------
Center     Atomic      Atomic             Coordinates (Angstroms)
Number     Number       Type             X           Y           Z
---------------------------------------------------------------------
1     6    0   	  -0.732422144714	  -2.600191981180	   0.185355016776
2     6    0   	   0.643604339853	  -2.441496827794	   0.728794670761
3     6    0   	   1.907103659551	  -1.326338933714	  -1.074197687620
4     6    0   	   1.370940120814	  -1.017536560103	   0.239419127342
5     6    0   	   0.346516143905	   0.121143739047	   0.368197619369
6     6    0   	   0.788608869865	   1.520224417364	  -0.104833194775
7     1    0   	   0.659794472844	  -2.349163369500	   1.815833490974
8     1    0   	   1.306370400712	  -3.268386670403	   0.457892799707
9     1    0   	   2.209679079679	  -0.912684364040	   0.938657000167
10    1    0   	  -0.561149058329	  -0.162662996446	  -0.164155194311
11    1    0   	   0.052820734269	   0.176209867009	   1.422946496989
12    1    0   	   1.599206379226	   1.894047901145	   0.530046784037
13    6    0   	   4.758272219520	  -0.350228182853	   0.208458893479
14    1    0   	   5.002013891188	  -1.150740848928	   0.908343175080
15    6    0   	   4.385393207300	  -0.815854607197	  -1.163885382457
16    1    0   	   4.117435084924	   0.005498199326	  -1.832952287979
17    1    0   	   5.239238567408	  -1.326870287188	  -1.625801199140
18    6    0   	   3.242757026248	  -1.934530202787	  -1.189471366327
19    1    0   	   3.445074457675	  -2.606406278401	  -0.348798993511
20    1    0   	   3.337771575494	  -2.487247106988	  -2.127765713506
21    6    0   	   1.142252027347	  -1.119732755313	  -2.325035447742
22    1    0   	   0.259673776795	  -0.493217146539	  -2.218611143975
23    1    0   	   1.797522639700	  -0.725416558678	  -3.112069955358
24    1    0   	   0.832147572501	  -2.112553801278	  -2.691746354533
25    6    0   	  -1.898580442374	  -2.599456416595	   0.870510606331
26    6    0   	  -2.008790865209	  -2.566079007525	   2.372907094520
27    1    0   	  -2.557259252092	  -3.450558958713	   2.720695408209
28    1    0   	  -1.045380476688	  -2.558015520856	   2.885376753843
29    1    0   	  -2.580526674246	  -1.696038484355	   2.711773597801
30    6    0   	  -0.395701527853	   2.487997178781	  -0.073408855514
31    6    0   	  -1.478024971064	   2.219508415227	  -0.825952365144
32    6    0   	  -0.259892853839	   3.664210409081	   0.860358109677
33    1    0   	   0.600872613394	   4.284808426625	   0.578815351114
34    1    0   	  -1.142937924430	   4.305164732696	   0.869630388992
35    1    0   	  -0.079278678123	   3.328211513500	   1.890384524584
36    6    0   	  -3.202735660100	  -2.702335985987	   0.104691413726
37    1    0   	  -3.627313937862	  -3.703862615230	   0.267634793507
38    1    0   	  -2.994141447510	  -2.620975852577	  -0.967676994566
39    6    0   	  -4.306694369049	  -1.673176035723	   0.489366563392
40    1    0   	  -5.134585023949	  -1.824875414480	  -0.209485189733
41    1    0   	  -4.703048788110	  -1.943996861677	   1.476614971874
42    6    0   	  -2.807152945390	   2.922024141377	  -0.856939597993
43    1    0   	  -2.719595669549	   3.958141975527	  -0.516211081595
44    1    0   	  -3.170255552010	   2.969761869323	  -1.890873499365
45    6    0   	  -3.906086234430	  -0.217028904376	   0.540709900949
46    1    0   	  -1.437977685779	   1.328293015868	  -1.454736992554
47    6    0   	  -4.216878020823	   0.777713378150	  -0.313140243322
48    1    0   	  -3.357431381942	   0.073847124093	   1.437355163129
49    6    0   	  -3.867675932983	   2.215550152082	   0.037973631179
50    1    0   	  -3.518171278369	   2.257303931089	   1.075347857341
51    1    0   	  -4.788688178626	   2.813903175070	  -0.008906770343
52    6    0   	  -4.977548932648	   0.587919664663	  -1.603910317527
53    1    0   	  -5.217104946043	  -0.456928668646	  -1.811041000265
54    1    0   	  -5.918266774698	   1.152949969262	  -1.585118588988
55    1    0   	  -4.405251612233	   0.970131221789	  -2.458581972980
56    6    0   	   4.923797533892	   0.919273780380	   0.635626302075
57    1    0   	   1.201098804673	   1.463757161413	  -1.122255762231
58    6    0   	   5.415862545432	   1.194560844802	   2.035046025872
59    1    0   	   6.360848694020	   1.751182379271	   2.008075262983
60    1    0   	   4.702307906920	   1.822951327923	   2.582947489584
61    1    0   	   5.578334555292	   0.276561639588	   2.605510173502
62    6    0   	   4.703245373464	   2.150507736104	  -0.205956727952
63    1    0   	   4.079412392878	   2.875575976714	   0.329769741492
64    1    0   	   5.661844623949	   2.650371776029	  -0.394649872255
65    1    0   	   4.239469745915	   1.951756015970	  -1.174090178808
66    1    0   	  -0.804727690416	  -2.703481595178	  -0.897113094832
---------------------------------------------------------------------
SCF Done:  E(scf) =  -977.111533975474     A.U.


IRC-IRC-IRC-IRC-IRC-IRC-IRC-IRC-IRC-IRC-IRC-IRC-IRC-IRC-IRC-IRC-IRC-IRC
Pt  9  Step number   1 out of a maximum of  2608
NET REACTION COORDINATE UP TO THIS POINT =    9.00000
IRC-IRC-IRC-IRC-IRC-IRC-IRC-IRC-IRC-IRC-IRC-IRC-IRC-IRC-IRC-IRC-IRC-IRC
                         Input orientation:
---------------------------------------------------------------------
Center     Atomic      Atomic             Coordinates (Angstroms)
Number     Number       Type             X           Y           Z
---------------------------------------------------------------------
1     6    0   	  -0.733721391420	  -2.601839158908	   0.185110989744
2     6    0   	   0.641872678791	  -2.444205561736	   0.729887156311
3     6    0   	   1.907573101670	  -1.328857290715	  -1.070987274792
4     6    0   	   1.370427946039	  -1.020079684346	   0.242172757287
5     6    0   	   0.346353506731	   0.118939935439	   0.370599247573
6     6    0   	   0.789492588233	   1.518022053305	  -0.101505843884
7     1    0   	   0.657188645672	  -2.352474395783	   1.816990500318
8     1    0   	   1.304506040706	  -3.271228019069	   0.459079194087
9     1    0   	   2.208439224439	  -0.915976271916	   0.942334745991
10    1    0   	  -0.561029537291	  -0.164068697983	  -0.162692839973
11    1    0   	   0.051830557429	   0.173626716375	   1.425140976169
12    1    0   	   1.600559479151	   1.890805825488	   0.533380780501
13    6    0   	   4.757511869824	  -0.346940241996	   0.207983236338
14    1    0   	   5.001035187589	  -1.144616212082	   0.911175245585
15    6    0   	   4.385755567302	  -0.818007921627	  -1.162829168319
16    1    0   	   4.118138447524	   0.000683885469	  -1.835274012918
17    1    0   	   5.240061901225	  -1.330649428638	  -1.622088825320
18    6    0   	   3.243357224399	  -1.936953559346	  -1.185256606292
19    1    0   	   3.446097058429	  -2.606898644935	  -0.343156945718
20    1    0   	   3.338264695536	  -2.491635684174	  -2.122421287335
21    6    0   	   1.143516937322	  -1.122497973283	  -2.322359903449
22    1    0   	   0.261024521638	  -0.495742847425	  -2.216608639915
23    1    0   	   1.799343264607	  -0.728530755494	  -3.109096441121
24    1    0   	   0.833367732085	  -2.115328256093	  -2.688983842730
25    6    0   	  -1.900543734886	  -2.600532290964	   0.869141511708
26    6    0   	  -2.012194498307	  -2.567774648385	   2.371440317945
27    1    0   	  -2.561384683485	  -3.452179462993	   2.718283623420
28    1    0   	  -1.049274942012	  -2.560374332097	   2.884845884434
29    1    0   	  -2.583882111200	  -1.697649187249	   2.710157748718
30    6    0   	  -0.394358210478	   2.486218005380	  -0.068990657141
31    6    0   	  -1.475243177990	   2.220704728098	  -0.824642514226
32    6    0   	  -0.260357755864	   3.658668527370	   0.869754046701
33    1    0   	   0.600894676780	   4.280445517957	   0.592343803562
34    1    0   	  -1.143477027837	   4.299512458884	   0.879947398541
35    1    0   	  -0.081673546221	   3.318559868131	   1.898770675055
36    6    0   	  -3.204001588245	  -2.702091851127	   0.101961607891
37    1    0   	  -3.629534195858	  -3.703353350995	   0.264034072377
38    1    0   	  -2.994244327686	  -2.620429803735	  -0.970156330418
39    6    0   	  -4.307544487876	  -1.672223937142	   0.485949641629
40    1    0   	  -5.134714351823	  -1.822769435647	  -0.214003294303
41    1    0   	  -4.705328919839	  -1.943352571944	   1.472541244033
42    6    0   	  -2.804186231721	   2.923648173497	  -0.855251431291
43    1    0   	  -2.716345906706	   3.959302652357	  -0.513149335618
44    1    0   	  -3.166829994923	   2.972904435970	  -1.889257071664
45    6    0   	  -3.905808883315	  -0.216438533274	   0.538790560094
46    1    0   	  -1.433952880348	   1.331864649593	  -1.456736605245
47    6    0   	  -4.215099312370	   0.779276329186	  -0.314473182880
48    1    0   	  -3.357794468784	   0.073286506996	   1.436199000495
49    6    0   	  -3.865376342436	   2.216558136101	   0.038368354364
50    1    0   	  -3.516336178513	   2.256988139893	   1.075951426254
51    1    0   	  -4.786123173312	   2.815350380865	  -0.008234786569
52    6    0   	  -4.974671953465	   0.591173444334	  -1.606133744745
53    1    0   	  -5.214865450512	  -0.453310077463	  -1.814364309081
54    1    0   	  -5.914952641924	   1.156945080342	  -1.587792829479
55    1    0   	  -4.401231342785	   0.973631619608	  -2.459928016335
56    6    0   	   4.922377820938	   0.924281403288	   0.630191264042
57    1    0   	   1.201475970111	   1.461869407729	  -1.119126848180
58    6    0   	   5.413351124317	   1.205334004904	   2.028855064170
59    1    0   	   6.358188180880	   1.762131546523	   2.000339349188
60    1    0   	   4.699210337832	   1.835695758663	   2.573721491316
61    1    0   	   5.575689077486	   0.289681668296	   2.603121313281
62    6    0   	   4.702115401189	   2.152121612204	  -0.216439492449
63    1    0   	   4.077539372768	   2.879063390185	   0.315868249972
64    1    0   	   5.660693912302	   2.651590743411	  -0.406273242183
65    1    0   	   4.239243486341	   1.949426100978	  -1.184189255418
66    1    0   	  -0.805090464391	  -2.704741444944	  -0.897447585307
---------------------------------------------------------------------
SCF Done:  E(scf) =  -977.111532374096     A.U.


IRC-IRC-IRC-IRC-IRC-IRC-IRC-IRC-IRC-IRC-IRC-IRC-IRC-IRC-IRC-IRC-IRC-IRC
Pt  10  Step number   1 out of a maximum of  2608
NET REACTION COORDINATE UP TO THIS POINT =    10.00000
IRC-IRC-IRC-IRC-IRC-IRC-IRC-IRC-IRC-IRC-IRC-IRC-IRC-IRC-IRC-IRC-IRC-IRC
                         Input orientation:
---------------------------------------------------------------------
Center     Atomic      Atomic             Coordinates (Angstroms)
Number     Number       Type             X           Y           Z
---------------------------------------------------------------------
1     6    0   	  -0.735018127732	  -2.603488386632	   0.184866543046
2     6    0   	   0.640137143113	  -2.446922269599	   0.730991530927
3     6    0   	   1.908046318624	  -1.331366365355	  -1.067744371052
4     6    0   	   1.369917165449	  -1.022627388542	   0.244960450808
5     6    0   	   0.346194370949	   0.116732297334	   0.373044193891
6     6    0   	   0.790380566153	   1.515816128456	  -0.098129827124
7     1    0   	   0.654569696590	  -2.355802679842	   1.818159357436
8     1    0   	   1.302639875185	  -3.274075048614	   0.460275586390
9     1    0   	   2.207196079911	  -0.919285509514	   0.946051284102
10    1    0   	  -0.560906111985	  -0.165478196764	  -0.161184495424
11    1    0   	   0.050846972689	   0.171035641475	   1.427379154962
12    1    0   	   1.601899841997	   1.887566162448	   0.536779890703
13    6    0   	   4.756772056856	  -0.343643193581	   0.207480743137
14    1    0   	   5.000107351706	  -1.138471640336	   0.913957982038
15    6    0   	   4.386114617552	  -0.820144911714	  -1.161773882169
16    1    0   	   4.118815424952	  -0.004124871070	  -1.837576024815
17    1    0   	   5.240876537410	  -1.334390061925	  -1.618394385384
18    6    0   	   3.243962911733	  -1.939361386600	  -1.181018118354
19    1    0   	   3.447137029545	  -2.607366405571	  -0.337493961053
20    1    0   	   3.338755697622	  -2.496012260055	  -2.117046801554
21    6    0   	   1.144784558950	  -1.125245718088	  -2.319649489250
22    1    0   	   0.262381435956	  -0.498247436755	  -2.214567676862
23    1    0   	   1.801165955388	  -0.731629645809	  -3.106088760749
24    1    0   	   0.834583693636	  -2.118082901981	  -2.686187079640
25    6    0   	  -1.902509971173	  -2.601610017509	   0.867759994204
26    6    0   	  -2.015616759422	  -2.569477548216	   2.369958402186
27    1    0   	  -2.565528824591	  -3.453809558479	   2.715846780570
28    1    0   	  -1.053194502484	  -2.562739474176	   2.884309045975
29    1    0   	  -2.587262251171	  -1.699270266607	   2.708524295443
30    6    0   	  -0.393009934249	   2.484435969613	  -0.064558264044
31    6    0   	  -1.472456729465	   2.221881374175	  -0.823287467792
32    6    0   	  -0.260810636549	   3.653155162060	   0.879084079127
33    1    0   	   0.600924788770	   4.276074619680	   0.605770449252
34    1    0   	  -1.144000206194	   4.293893045871	   0.890169069198
35    1    0   	  -0.084048869902	   3.308995425991	   1.907090370731
36    6    0   	  -3.205260503151	  -2.701844749791	   0.099206609652
37    1    0   	  -3.631747233050	  -3.702841490144	   0.260396167604
38    1    0   	  -2.994329160135	  -2.619874433014	  -0.972656843715
39    6    0   	  -4.308391410749	  -1.671272530671	   0.482503126362
40    1    0   	  -5.134831592088	  -1.820662356413	  -0.218557555519
41    1    0   	  -4.707613845771	  -1.942712332877	   1.468431247428
42    6    0   	  -2.801209312078	   2.925260111984	  -0.853548640787
43    1    0   	  -2.713089163826	   3.960451239035	  -0.510078964700
44    1    0   	  -3.163374146880	   2.976028444206	  -1.887631249471
45    6    0   	  -3.905533046295	  -0.215850537161	   0.536851994001
46    1    0   	  -1.429930587055	   1.335397581316	  -1.458638113946
47    6    0   	  -4.213328217200	   0.780840951035	  -0.315814396571
48    1    0   	  -3.358156383987	   0.072718079904	   1.435021261872
49    6    0   	  -3.863084452685	   2.217564002984	   0.038761103645
50    1    0   	  -3.514523970667	   2.256668647921	   1.076556301127
51    1    0   	  -4.783561530751	   2.816800267986	  -0.007578001823
52    6    0   	  -4.971805738159	   0.594437809697	  -1.608361227648
53    1    0   	  -5.212626760153	  -0.449678965050	  -1.817704439453
54    1    0   	  -5.911653365892	   1.160941948158	  -1.590457564765
55    1    0   	  -4.397230743701	   0.977157642242	  -2.461274862583
56    6    0   	   4.920958773764	   0.929280382812	   0.624729856087
57    1    0   	   1.201884416366	   1.459978556999	  -1.115938309182
58    6    0   	   5.410862370315	   1.216096371623	   2.022607586598
59    1    0   	   6.355528953393	   1.773100457941	   1.992529261841
60    1    0   	   4.696125584234	   1.848384407050	   2.564458104509
61    1    0   	   5.573112047145	   0.302802738764	   2.600650933526
62    6    0   	   4.700937387992	   2.153710974001	  -0.226919887439
63    1    0   	   4.075613419619	   2.882492115246	   0.301985179565
64    1    0   	   5.659478045673	   2.652807529118	  -0.417912516459
65    1    0   	   4.238950719001	   1.947070722861	  -1.194261778363
66    1    0   	  -0.805440592791	  -2.705999962676	  -0.897782490226
---------------------------------------------------------------------
SCF Done:  E(scf) =  -977.111530533037     A.U.


IRC-IRC-IRC-IRC-IRC-IRC-IRC-IRC-IRC-IRC-IRC-IRC-IRC-IRC-IRC-IRC-IRC-IRC
Pt  11  Step number   1 out of a maximum of  2608
NET REACTION COORDINATE UP TO THIS POINT =    11.00000
IRC-IRC-IRC-IRC-IRC-IRC-IRC-IRC-IRC-IRC-IRC-IRC-IRC-IRC-IRC-IRC-IRC-IRC
                         Input orientation:
---------------------------------------------------------------------
Center     Atomic      Atomic             Coordinates (Angstroms)
Number     Number       Type             X           Y           Z
---------------------------------------------------------------------
1     6    0   	  -0.736419628473	  -2.605263091438	   0.184582176826
2     6    0   	   0.638249483082	  -2.449867943932	   0.732185332427
3     6    0   	   1.908589518327	  -1.334067721735	  -1.064182327241
4     6    0   	   1.369364361642	  -1.025379602684	   0.248015564111
5     6    0   	   0.346016157087	   0.114342000094	   0.375719236974
6     6    0   	   0.791336840802	   1.513438184638	  -0.094409349986
7     1    0   	   0.651712759557	  -2.359428191303	   1.819422457262
8     1    0   	   1.300613411299	  -3.277156893614	   0.461561705000
9     1    0   	   2.205827380096	  -0.922876592833	   0.950135820964
10    1    0   	  -0.560759671786	  -0.167001309265	  -0.159550589228
11    1    0   	   0.049746803104	   0.168211197820	   1.429821299407
12    1    0   	   1.603319071868	   1.884066861316	   0.540558018942
13    6    0   	   4.755970756198	  -0.340066481763	   0.206944519036
14    1    0   	   4.999066380985	  -1.131741411896	   0.917019203187
15    6    0   	   4.386559588401	  -0.822527159803	  -1.160567689635
16    1    0   	   4.119665113341	  -0.009465320618	  -1.840054953601
17    1    0   	   5.241821539736	  -1.338542253751	  -1.614238091360
18    6    0   	   3.244640631633	  -1.941980305348	  -1.176350336272
19    1    0   	   3.448252988366	  -2.607871507304	  -0.331278912947
20    1    0   	   3.339304969507	  -2.500779177865	  -2.111129999854
21    6    0   	   1.146224580988	  -1.128177552403	  -2.316680447592
22    1    0   	   0.263927248750	  -0.500902130804	  -2.212338551368
23    1    0   	   1.803233255455	  -0.734942627217	  -3.102774914891
24    1    0   	   0.835959641098	  -2.121011577453	  -2.683146195472
25    6    0   	  -1.904640619116	  -2.602778096578	   0.866232190756
26    6    0   	  -2.019339420007	  -2.571350960524	   2.368318124357
27    1    0   	  -2.570025457910	  -3.455615082765	   2.713148887488
28    1    0   	  -1.057463317810	  -2.565329640806	   2.883700802557
29    1    0   	  -2.590951878661	  -1.701067555348	   2.706730673607
30    6    0   	  -0.391564873062	   2.482502385699	  -0.059718234726
31    6    0   	  -1.469421144468	   2.223176236695	  -0.821785829279
32    6    0   	  -0.261374603302	   3.647132663566	   0.889214458471
33    1    0   	   0.600898790411	   4.271244968686	   0.620412730456
34    1    0   	  -1.144631937402	   4.287766314027	   0.901210707363
35    1    0   	  -0.086767694447	   3.298578636217	   1.916097683302
36    6    0   	  -3.206613196407	  -2.701563077070	   0.096179869845
37    1    0   	  -3.634133766061	  -3.702273167435	   0.256390379039
38    1    0   	  -2.994400310779	  -2.619241470409	  -0.975401867861
39    6    0   	  -4.309296165212	  -1.670232318698	   0.478737469724
40    1    0   	  -5.134939386592	  -1.818360925506	  -0.223524493841
41    1    0   	  -4.710078893780	  -1.942016757635	   1.463938869824
42    6    0   	  -2.797974950199	   2.927012563307	  -0.851681203285
43    1    0   	  -2.709565376825	   3.961700492808	  -0.506733723977
44    1    0   	  -3.159614611337	   2.979412071607	  -1.885845129698
45    6    0   	  -3.905220931585	  -0.215209849771	   0.534737726103
46    1    0   	  -1.425521213926	   1.339282558336	  -1.460660315118
47    6    0   	  -4.211403465016	   0.782548437363	  -0.317260974562
48    1    0   	  -3.358524299855	   0.072091691851	   1.433724550949
49    6    0   	  -3.860589785730	   2.218657218286	   0.039205070065
50    1    0   	  -3.512544650524	   2.256314930661	   1.077225402535
51    1    0   	  -4.780772784819	   2.818377081006	  -0.006836371370
52    6    0   	  -4.968710196688	   0.598005347741	  -1.610754585536
53    1    0   	  -5.210209279818	  -0.445708499982	  -1.821316859452
54    1    0   	  -5.908088162922	   1.165300196723	  -1.593298232971
55    1    0   	  -4.392922028264	   0.981020864328	  -2.462714646995
56    6    0   	   4.919397676898	   0.934689063513	   0.618738233116
57    1    0   	   1.202358161666	   1.457965491048	  -1.112406545718
58    6    0   	   5.408072396721	   1.227834194209	   2.015723351330
59    1    0   	   6.352564416596	   1.785037020512	   1.983958671263
60    1    0   	   4.692673306285	   1.862232128310	   2.554210419334
61    1    0   	   5.570179761577	   0.317163835618	   2.597913319303
62    6    0   	   4.699666447560	   2.155333426802	  -0.238406058974
63    1    0   	   4.073455611254	   2.886078911715	   0.286704832938
64    1    0   	   5.658160558849	   2.654053515673	  -0.430597178755
65    1    0   	   4.238734160521	   1.944347156394	  -1.205302451883
66    1    0   	  -0.805804286857	  -2.707330268460	  -0.898165754121
---------------------------------------------------------------------
SCF Done:  E(scf) =  -977.111528251977     A.U.


IRC-IRC-IRC-IRC-IRC-IRC-IRC-IRC-IRC-IRC-IRC-IRC-IRC-IRC-IRC-IRC-IRC-IRC
Pt  12  Step number   1 out of a maximum of  2608
NET REACTION COORDINATE UP TO THIS POINT =    12.00000
IRC-IRC-IRC-IRC-IRC-IRC-IRC-IRC-IRC-IRC-IRC-IRC-IRC-IRC-IRC-IRC-IRC-IRC
                         Input orientation:
---------------------------------------------------------------------
Center     Atomic      Atomic             Coordinates (Angstroms)
Number     Number       Type             X           Y           Z
---------------------------------------------------------------------
1     6    0   	  -0.737727612420	  -2.606897313000	   0.184288251494
2     6    0   	   0.636484385539	  -2.452601026547	   0.733280119987
3     6    0   	   1.909105924089	  -1.336553297376	  -1.060853098823
4     6    0   	   1.368848741614	  -1.027924790639	   0.250870331772
5     6    0   	   0.345851863027	   0.112133337485	   0.378230837790
6     6    0   	   0.792234604638	   1.511250594502	  -0.090889663564
7     1    0   	   0.649036383172	  -2.362809729949	   1.820582793332
8     1    0   	   1.298721233484	  -3.280012244873	   0.462735222735
9     1    0   	   2.204546849743	  -0.926220847373	   0.953958079895
10    1    0   	  -0.560615146302	  -0.168394586089	  -0.158022216223
11    1    0   	   0.048711644129	   0.165579664257	   1.432112903784
12    1    0   	   1.604621450400	   1.880830613375	   0.544167201847
13    6    0   	   4.755215493506	  -0.336765268547	   0.206486213874
14    1    0   	   4.998028575298	  -1.125465389356	   0.919973592906
15    6    0   	   4.387028198182	  -0.824844662948	  -1.159396671619
16    1    0   	   4.120610207898	  -0.014570384424	  -1.842392565728
17    1    0   	   5.242755856841	  -1.342593348523	  -1.610220255293
18    6    0   	   3.245258466420	  -1.944446857704	  -1.171975454996
19    1    0   	   3.449231379853	  -2.608384010596	  -0.325462211825
20    1    0   	   3.339789503561	  -2.505247141635	  -2.105593620998
21    6    0   	   1.147606993619	  -1.130818875596	  -2.313912271230
22    1    0   	   0.265434689316	  -0.503248141544	  -2.210261861565
23    1    0   	   1.805230335074	  -0.737952756762	  -3.099666778574
24    1    0   	   0.837242691808	  -2.123627549947	  -2.680337092913
25    6    0   	  -1.906629517982	  -2.603875956580	   0.864777517466
26    6    0   	  -2.022812890103	  -2.573140985177	   2.366759255591
27    1    0   	  -2.574212295356	  -3.457354126827	   2.710585245676
28    1    0   	  -1.061446125886	  -2.567790103106	   2.883104400059
29    1    0   	  -2.594401930787	  -1.702798832626	   2.705047639100
30    6    0   	  -0.390212994400	   2.480731817185	  -0.055189386363
31    6    0   	  -1.466607712847	   2.224367652220	  -0.820326911363
32    6    0   	  -0.261861622789	   3.641622140766	   0.898587957093
33    1    0   	   0.600953613591	   4.266783001900	   0.633968657916
34    1    0   	  -1.145148563353	   4.282206250017	   0.911357778163
35    1    0   	  -0.089312410245	   3.289040829861	   1.924458350040
36    6    0   	  -3.207875750090	  -2.701307009737	   0.093326306340
37    1    0   	  -3.636348482330	  -3.701758250282	   0.252603266523
38    1    0   	  -2.994470110846	  -2.618631745371	  -0.977991180306
39    6    0   	  -4.310151094514	  -1.669288996152	   0.475220012238
40    1    0   	  -5.135055147475	  -1.816239627190	  -0.228158067050
41    1    0   	  -4.712377773108	  -1.941414945657	   1.459742903938
42    6    0   	  -2.794976238282	   2.928628237246	  -0.849902980966
43    1    0   	  -2.706306873265	   3.962848575624	  -0.503579935202
44    1    0   	  -3.156112515294	   2.982542023669	  -1.884148468148
45    6    0   	  -3.904953363725	  -0.214636331393	   0.532777116242
46    1    0   	  -1.421449869786	   1.342845506282	  -1.462431731069
47    6    0   	  -4.209633517363	   0.784121053356	  -0.318593616078
48    1    0   	  -3.358894021257	   0.071478744613	   1.432530013903
49    6    0   	  -3.858292317681	   2.219656748869	   0.039642087153
50    1    0   	  -3.510741417063	   2.255964301454	   1.077876889862
51    1    0   	  -4.778199842818	   2.819828168095	  -0.006133637607
52    6    0   	  -4.965847346657	   0.601315645995	  -1.612971623604
53    1    0   	  -5.207966941045	  -0.442023624214	  -1.824679686704
54    1    0   	  -5.904794532947	   1.169336058677	  -1.595925679896
55    1    0   	  -4.388933878818	   0.984621660564	  -2.464039844388
56    6    0   	   4.917945292188	   0.939717126511	   0.613130677541
57    1    0   	   1.202850042194	   1.456136075138	  -1.109045809026
58    6    0   	   5.405413361220	   1.238832422895	   2.009290311425
59    1    0   	   6.349780281248	   1.796158255812	   1.975966273967
60    1    0   	   4.689407565984	   1.875282292110	   2.544553581470
61    1    0   	   5.567297860041	   0.330641988033	   2.595424856816
62    6    0   	   4.698550986656	   2.156787879177	  -0.249214620477
63    1    0   	   4.071454055990	   2.889380554590	   0.272264523134
64    1    0   	   5.657011964614	   2.655162527310	  -0.442458280949
65    1    0   	   4.238695150926	   1.941695035103	  -1.215727019707
66    1    0   	  -0.806140335572	  -2.708523315834	  -0.898554877237
---------------------------------------------------------------------
SCF Done:  E(scf) =  -977.111525851439     A.U.


IRC-IRC-IRC-IRC-IRC-IRC-IRC-IRC-IRC-IRC-IRC-IRC-IRC-IRC-IRC-IRC-IRC-IRC
Pt  13  Step number   1 out of a maximum of  2608
NET REACTION COORDINATE UP TO THIS POINT =    13.00000
IRC-IRC-IRC-IRC-IRC-IRC-IRC-IRC-IRC-IRC-IRC-IRC-IRC-IRC-IRC-IRC-IRC-IRC
                         Input orientation:
---------------------------------------------------------------------
Center     Atomic      Atomic             Coordinates (Angstroms)
Number     Number       Type             X           Y           Z
---------------------------------------------------------------------
1     6    0   	  -0.739080779761	  -2.608587944917	   0.183971561115
2     6    0   	   0.634661818189	  -2.455448917616	   0.734391757889
3     6    0   	   1.909612570355	  -1.339044148810	  -1.057403595675
4     6    0   	   1.368314581620	  -1.030567558357	   0.253863696209
5     6    0   	   0.345692271732	   0.109839548957	   0.380938929836
6     6    0   	   0.793200878337	   1.508987933263	  -0.087069278712
7     1    0   	   0.646279484734	  -2.366378899971	   1.821764827341
8     1    0   	   1.296762011900	  -3.282977326074	   0.463885537392
9     1    0   	   2.203234766934	  -0.929730840973	   0.957938779239
10    1    0   	  -0.560451104516	  -0.169831587655	  -0.156336172548
11    1    0   	   0.047654212248	   0.162804814766	   1.434594870844
12    1    0   	   1.605896331538	   1.877490624420	   0.548214707716
13    6    0   	   4.754496741389	  -0.333363353773	   0.205917073701
14    1    0   	   4.997136750871	  -1.119059508998	   0.922770089613
15    6    0   	   4.387437943324	  -0.827068399306	  -1.158270178827
16    1    0   	   4.121379996177	  -0.019611756765	  -1.844723001186
17    1    0   	   5.243617646725	  -1.346474342865	  -1.606325618400
18    6    0   	   3.245879206420	  -1.946874564695	  -1.167530084093
19    1    0   	   3.450291232842	  -2.608818416622	  -0.319575554490
20    1    0   	   3.340247818754	  -2.509690977974	  -2.099972841332
21    6    0   	   1.148968335775	  -1.133412081723	  -2.311007631098
22    1    0   	   0.266985094774	  -0.505457295948	  -2.208038204462
23    1    0   	   1.807215359137	  -0.741019347744	  -3.096462554460
24    1    0   	   0.838375826968	  -2.126178617855	  -2.677333675131
25    6    0   	  -1.908683186871	  -2.605004642855	   0.863262872142
26    6    0   	  -2.026400434873	  -2.574980381676	   2.365134092645
27    1    0   	  -2.578561376485	  -3.459122898130	   2.707922087316
28    1    0   	  -1.065561898319	  -2.570347624716	   2.882472680407
29    1    0   	  -2.597940512025	  -1.704559907548	   2.703291349979
30    6    0   	  -0.388761213403	   2.478933859381	  -0.050533336148
31    6    0   	  -1.463738292660	   2.225418456834	  -0.818600206891
32    6    0   	  -0.262120545247	   3.636332196173	   0.907702455208
33    1    0   	   0.601230665562	   4.262393241975	   0.647002676091
34    1    0   	  -1.145404631899	   4.276911887881	   0.921134931410
35    1    0   	  -0.091543997138	   3.280029244342	   1.932617574339
36    6    0   	  -3.209177418002	  -2.701040718097	   0.090370563591
37    1    0   	  -3.638607257448	  -3.701237286577	   0.248658781914
38    1    0   	  -2.994545014530	  -2.617972470268	  -0.980670699555
39    6    0   	  -4.311057596678	  -1.668352074389	   0.471604526399
40    1    0   	  -5.135198616745	  -1.814109805571	  -0.232914257344
41    1    0   	  -4.714752819065	  -1.940847837982	   1.455426406423
42    6    0   	  -2.791872259365	   2.930180255495	  -0.848029926064
43    1    0   	  -2.702938375253	   3.963931392080	  -0.500341848824
44    1    0   	  -3.152379679168	   2.985600629068	  -1.882399408228
45    6    0   	  -3.904754985268	  -0.214070022947	   0.530770075170
46    1    0   	  -1.417418999339	   1.346104287045	  -1.463669914441
47    6    0   	  -4.207876673600	   0.785691469749	  -0.319980157500
48    1    0   	  -3.359398427101	   0.070851226676	   1.431327129027
49    6    0   	  -3.856022858505	   2.220647187535	   0.040053569142
50    1    0   	  -3.509090716881	   2.255609509759	   1.078541409105
51    1    0   	  -4.775631525797	   2.821295011927	  -0.005577324418
52    6    0   	  -4.962899462765	   0.604634871543	  -1.615295714118
53    1    0   	  -5.205613176725	  -0.438326605950	  -1.828182425543
54    1    0   	  -5.901419826957	   1.173373461628	  -1.598718638555
55    1    0   	  -4.384803317937	   0.988246125992	  -2.465423051226
56    6    0   	   4.916477715932	   0.944822236450	   0.607397579735
57    1    0   	   1.203588802385	   1.454260459025	  -1.105316718162
58    6    0   	   5.402831083030	   1.249924287100	   2.002656638632
59    1    0   	   6.347011928339	   1.807464850171	   1.967700981230
60    1    0   	   4.686200575034	   1.888317636553	   2.534762389725
61    1    0   	   5.564634792921	   0.344239496052	   2.592682055001
62    6    0   	   4.697267384012	   2.158281356589	  -0.260097127714
63    1    0   	   4.069288769120	   2.892652936459	   0.257804669714
64    1    0   	   5.655645795942	   2.656367776739	  -0.454479446239
65    1    0   	   4.238410939907	   1.939062286610	  -1.226157995352
66    1    0   	  -0.806494007321	  -2.709756083934	  -0.898968284335
---------------------------------------------------------------------
SCF Done:  E(scf) =  -977.111523172539     A.U.


IRC-IRC-IRC-IRC-IRC-IRC-IRC-IRC-IRC-IRC-IRC-IRC-IRC-IRC-IRC-IRC-IRC-IRC
Pt  14  Step number   1 out of a maximum of  2608
NET REACTION COORDINATE UP TO THIS POINT =    14.00000
IRC-IRC-IRC-IRC-IRC-IRC-IRC-IRC-IRC-IRC-IRC-IRC-IRC-IRC-IRC-IRC-IRC-IRC
                         Input orientation:
---------------------------------------------------------------------
Center     Atomic      Atomic             Coordinates (Angstroms)
Number     Number       Type             X           Y           Z
---------------------------------------------------------------------
1     6    0   	  -0.740453677889	  -2.610296897285	   0.183626704407
2     6    0   	   0.632812543721	  -2.458349207176	   0.735493855214
3     6    0   	   1.910132208453	  -1.341528686198	  -1.053895461394
4     6    0   	   1.367772344920	  -1.033249139153	   0.256916499412
5     6    0   	   0.345530329708	   0.107507688163	   0.383727203008
6     6    0   	   0.794198054360	   1.506700616292	  -0.083088026401
7     1    0   	   0.643485468861	  -2.370042990284	   1.822939478117
8     1    0   	   1.294771450753	  -3.285989765246	   0.465000048033
9     1    0   	   2.201898897256	  -0.933314314305	   0.961998790791
10    1    0   	  -0.560269370419	  -0.171282098649	  -0.154611013372
11    1    0   	   0.046558022947	   0.159949000916	   1.437147494709
12    1    0   	   1.607143314854	   1.874103943360	   0.552509490785
13    6    0   	   4.753778634962	  -0.329924765773	   0.205323717532
14    1    0   	   4.996250018415	  -1.112569575290	   0.925564435678
15    6    0   	   4.387862849644	  -0.829310759809	  -1.157126237493
16    1    0   	   4.122174547978	  -0.024716013551	  -1.847062910964
17    1    0   	   5.244496353500	  -1.350384402462	  -1.602374699148
18    6    0   	   3.246508808721	  -1.949303769511	  -1.163028341887
19    1    0   	   3.451364114365	  -2.609240114661	  -0.313630435536
20    1    0   	   3.340701559418	  -2.514146822344	  -2.094285448869
21    6    0   	   1.150362807442	  -1.135950790999	  -2.308048028294
22    1    0   	   0.268612104324	  -0.507550326089	  -2.205765819251
23    1    0   	   1.809258918941	  -0.744092909382	  -3.093210039974
24    1    0   	   0.839462886235	  -2.128657603797	  -2.674257909461
25    6    0   	  -1.910763193777	  -2.606147118081	   0.861706214394
26    6    0   	  -2.030031971836	  -2.576855259620	   2.363463902915
27    1    0   	  -2.582973530742	  -3.460921474967	   2.705192724052
28    1    0   	  -1.069729322397	  -2.572965440448	   2.881806843636
29    1    0   	  -2.601511418326	  -1.706351193438	   2.701496252111
30    6    0   	  -0.387268882710	   2.477128156719	  -0.045801158473
31    6    0   	  -1.460838903302	   2.226413090688	  -0.816743065282
32    6    0   	  -0.262299081958	   3.631137477868	   0.916727750203
33    1    0   	   0.601605395573	   4.258015802667	   0.659868189893
34    1    0   	  -1.145554735684	   4.271748956045	   0.930742711411
35    1    0   	  -0.093704439689	   3.271240882860	   1.940715275693
36    6    0   	  -3.210495135454	  -2.700763415871	   0.087358177439
37    1    0   	  -3.640882579230	  -3.700708310619	   0.244625534295
38    1    0   	  -2.994624650264	  -2.617275051650	  -0.983400823749
39    6    0   	  -4.311983636345	  -1.667415017350	   0.467948595053
40    1    0   	  -5.135355373437	  -1.811969997912	  -0.237715590470
41    1    0   	  -4.717150355615	  -1.940298019543	   1.451060340560
42    6    0   	  -2.788719605838	   2.931704716199	  -0.846105869491
43    1    0   	  -2.699524136880	   3.964986924435	  -0.497060648299
44    1    0   	  -3.148541986177	   2.988623510085	  -1.880617560764
45    6    0   	  -3.904583927226	  -0.213505152439	   0.528749001307
46    1    0   	  -1.413391152921	   1.349241058851	  -1.464665362002
47    6    0   	  -4.206125097045	   0.787264045968	  -0.321379735262
48    1    0   	  -3.359954169230	   0.070215734031	   1.430123978990
49    6    0   	  -3.853762078102	   2.221635137148	   0.040464212094
50    1    0   	  -3.507501937663	   2.255253515629	   1.079220619140
51    1    0   	  -4.773060521779	   2.822771860601	  -0.005072782906
52    6    0   	  -4.959921678344	   0.607963688673	  -1.617650305935
53    1    0   	  -5.203216974110	  -0.434617882679	  -1.831731475538
54    1    0   	  -5.898017663949	   1.177415268286	  -1.601558565143
55    1    0   	  -4.380625130304	   0.991889569355	  -2.466817665558
56    6    0   	   4.914981234376	   0.949961854257	   0.601582338727
57    1    0   	   1.204462080662	   1.452393015337	  -1.101387745531
58    6    0   	   5.400194803898	   1.261114459909	   1.995908567218
59    1    0   	   6.344179807413	   1.818880102344	   1.959308757721
60    1    0   	   4.682921277482	   1.901445723118	   2.524813721452
61    1    0   	   5.561924284535	   0.357978574426	   2.589853635423
62    6    0   	   4.695938247584	   2.159748445277	  -0.271097388244
63    1    0   	   4.067028219412	   2.895874126622	   0.243171204873
64    1    0   	   5.654219747758	   2.657577234505	  -0.466601643147
65    1    0   	   4.238126482206	   1.936349636166	  -1.236697518563
66    1    0   	  -0.806855906934	  -2.710987832324	  -0.899411232378
---------------------------------------------------------------------
SCF Done:  E(scf) =  -977.111520202648     A.U.


IRC-IRC-IRC-IRC-IRC-IRC-IRC-IRC-IRC-IRC-IRC-IRC-IRC-IRC-IRC-IRC-IRC-IRC
Pt  15  Step number   1 out of a maximum of  2608
NET REACTION COORDINATE UP TO THIS POINT =    15.00000
IRC-IRC-IRC-IRC-IRC-IRC-IRC-IRC-IRC-IRC-IRC-IRC-IRC-IRC-IRC-IRC-IRC-IRC
                         Input orientation:
---------------------------------------------------------------------
Center     Atomic      Atomic             Coordinates (Angstroms)
Number     Number       Type             X           Y           Z
---------------------------------------------------------------------
1     6    0   	  -0.741849024435	  -2.612028167690	   0.183249555858
2     6    0   	   0.630933418604	  -2.461310613742	   0.736583708002
3     6    0   	   1.910666838367	  -1.344009529973	  -1.050323559531
4     6    0   	   1.367221203392	  -1.035976713311	   0.260033612701
5     6    0   	   0.345365728250	   0.105130557749	   0.386602477081
6     6    0   	   0.795231310433	   1.504383230607	  -0.078926963594
7     1    0   	   0.640650682711	  -2.373815664982	   1.824104280085
8     1    0   	   1.292745528383	  -3.289057796527	   0.466072527854
9     1    0   	   2.200536471906	  -0.936982048220	   0.966145397973
10    1    0   	  -0.560067205309	  -0.172748811297	  -0.152846860632
11    1    0   	   0.045416550005	   0.156998871092	   1.439775951836
12    1    0   	   1.608361913467	   1.870659688513	   0.557080786928
13    6    0   	   4.753055467132	  -0.326443099592	   0.204706282332
14    1    0   	   4.995356845900	  -1.105980762564	   0.928366265248
15    6    0   	   4.388306861911	  -0.831579205224	  -1.155960950181
16    1    0   	   4.123004790590	  -0.029898481725	  -1.849418526026
17    1    0   	   5.245397895469	  -1.354336908200	  -1.598350541254
18    6    0   	   3.247148700699	  -1.951738900721	  -1.158464088549
19    1    0   	   3.452450097774	  -2.609652844529	  -0.307619776586
20    1    0   	   3.341151244327	  -2.518620417374	  -2.088524693119
21    6    0   	   1.151795457689	  -1.138432057422	  -2.305029208109
22    1    0   	   0.270324489682	  -0.509518909475	  -2.203441062621
23    1    0   	   1.811369206876	  -0.747174780918	  -3.089904325136
24    1    0   	   0.840502466837	  -2.131059530857	  -2.671105823974
25    6    0   	  -1.912872737129	  -2.607305387678	   0.860102619877
26    6    0   	  -2.033711711723	  -2.578769082721	   2.361743624719
27    1    0   	  -2.587455855932	  -3.462751925344	   2.702390663825
28    1    0   	  -1.073953070189	  -2.575650452945	   2.881102501188
29    1    0   	  -2.605116464944	  -1.708174796959	   2.699657855505
30    6    0   	  -0.385729213255	   2.475312073262	  -0.040979744044
31    6    0   	  -1.457903184137	   2.227346038563	  -0.814742370390
32    6    0   	  -0.262386494742	   3.626044288962	   0.925669811913
33    1    0   	   0.602089750765	   4.253654970283	   0.672564575884
34    1    0   	  -1.145586685528	   4.266726033078	   0.940183941178
35    1    0   	  -0.095782188440	   3.262688948594	   1.948761445979
36    6    0   	  -3.211831670513	  -2.700473480866	   0.084283340752
37    1    0   	  -3.643178251281	  -3.700169579858	   0.240495129195
38    1    0   	  -2.994711034379	  -2.616535668670	  -0.986186976087
39    6    0   	  -4.312931383221	  -1.666476154970	   0.464248209448
40    1    0   	  -5.135527612596	  -1.809816795508	  -0.242566392141
41    1    0   	  -4.719572839075	  -1.939765328832	   1.446640140854
42    6    0   	  -2.785509361244	   2.933200347931	  -0.844124871439
43    1    0   	  -2.696054492200	   3.966013724160	  -0.493730053134
44    1    0   	  -3.144584613204	   2.991610030213	  -1.878798983606
45    6    0   	  -3.904441739253	  -0.212940352786	   0.526712361568
46    1    0   	  -1.409363319188	   1.352244092426	  -1.465399378105
47    6    0   	  -4.204376872125	   0.788840836851	  -0.322794178537
48    1    0   	  -3.360565524196	   0.069572701446	   1.428920865259
49    6    0   	  -3.851507703737	   2.222622107334	   0.040873879437
50    1    0   	  -3.505978913216	   2.254897518965	   1.079916302863
51    1    0   	  -4.770482940893	   2.824262189380	  -0.004625771746
52    6    0   	  -4.956907999441	   0.611305328308	  -1.620039594373
53    1    0   	  -5.200771541056	  -0.430894047970	  -1.835332723775
54    1    0   	  -5.894582127729	   1.181464647714	  -1.604452003075
55    1    0   	  -4.376390810390	   0.995556023652	  -2.468225669277
56    6    0   	   4.913446371842	   0.955145444263	   0.595672790494
57    1    0   	   1.205485784901	   1.450533227545	  -1.097235992830
58    6    0   	   5.397482911068	   1.272426954473	   1.989033466000
59    1    0   	   6.341267591056	   1.830419751452	   1.950780589700
60    1    0   	   4.679548105336	   1.914702345126	   2.514677243378
61    1    0   	   5.559130522214	   0.371891081812	   2.586940057469
62    6    0   	   4.694560796852	   2.161188321176	  -0.282240993210
63    1    0   	   4.064650314312	   2.899038457182	   0.228318126787
64    1    0   	   5.652729242508	   2.658800740408	  -0.478833920971
65    1    0   	   4.237864013832	   1.933542746862	  -1.247377936096
66    1    0   	  -0.807228040644	  -2.712220738076	  -0.899888007796
---------------------------------------------------------------------
SCF Done:  E(scf) =  -977.111516929976     A.U.


IRC-IRC-IRC-IRC-IRC-IRC-IRC-IRC-IRC-IRC-IRC-IRC-IRC-IRC-IRC-IRC-IRC-IRC
Pt  16  Step number   1 out of a maximum of  2608
NET REACTION COORDINATE UP TO THIS POINT =    16.00000
IRC-IRC-IRC-IRC-IRC-IRC-IRC-IRC-IRC-IRC-IRC-IRC-IRC-IRC-IRC-IRC-IRC-IRC
                         Input orientation:
---------------------------------------------------------------------
Center     Atomic      Atomic             Coordinates (Angstroms)
Number     Number       Type             X           Y           Z
---------------------------------------------------------------------
1     6    0   	  -0.743263795990	  -2.613778852349	   0.182841773714
2     6    0   	   0.629028351119	  -2.464327850009	   0.737660045831
3     6    0   	   1.911215931054	  -1.346482266123	  -1.046694314289
4     6    0   	   1.366661893332	  -1.038746294974	   0.263209399425
5     6    0   	   0.345198141837	   0.102711196882	   0.389558615729
6     6    0   	   0.796300741549	   1.502039389906	  -0.074588037066
7     1    0   	   0.637780615466	  -2.377689979694	   1.825257695416
8     1    0   	   1.290688336121	  -3.292176105254	   0.467102009922
9     1    0   	   2.199149580983	  -0.940727377427	   0.970370976141
10    1    0   	  -0.559843102478	  -0.174228630912	  -0.151052124858
11    1    0   	   0.044226663957	   0.153955950174	   1.442473095804
12    1    0   	   1.609548338564	   1.867160792786	   0.561931696868
13    6    0   	   4.752329242971	  -0.322924710098	   0.204062580405
14    1    0   	   4.994464950743	  -1.099305320534	   0.931164421360
15    6    0   	   4.388768041347	  -0.833868205087	  -1.154778969002
16    1    0   	   4.123865396802	  -0.035147936839	  -1.851786086251
17    1    0   	   5.246319425080	  -1.358321132847	  -1.594265575861
18    6    0   	   3.247798042403	  -1.954175287824	  -1.153845775980
19    1    0   	   3.453549074317	  -2.610054406314	  -0.301554405598
20    1    0   	   3.341596019822	  -2.523104107655	  -2.082700613813
21    6    0   	   1.153264843395	  -1.140850817961	  -2.301956722150
22    1    0   	   0.272125473771	  -0.511351843090	  -2.201070147208
23    1    0   	   1.813545056672	  -0.750268927985	  -3.086554600430
24    1    0   	   0.841484288118	  -2.133378576707	  -2.667877079767
25    6    0   	  -1.915007543460	  -2.608477099076	   0.858455747550
26    6    0   	  -2.037432845630	  -2.580717647166	   2.359976999708
27    1    0   	  -2.591999966999	  -3.464610064415	   2.699521712172
28    1    0   	  -1.078225490502	  -2.578396826388	   2.880361599525
29    1    0   	  -2.608749122695	  -1.710026685933	   2.697779813018
30    6    0   	  -0.384142534706	   2.473489499316	  -0.036075495585
31    6    0   	  -1.454934954357	   2.228212670422	  -0.812598298689
32    6    0   	  -0.262377586586	   3.621068976661	   0.934510501259
33    1    0   	   0.602688883381	   4.249324535067	   0.685062834966
34    1    0   	  -1.145494200873	   4.261861180044	   0.949437557601
35    1    0   	  -0.097768554391	   3.254400332765	   1.956742522324
36    6    0   	  -3.213183787179	  -2.700171303959	   0.081152002662
37    1    0   	  -3.645489259232	  -3.699621802536	   0.236275499318
38    1    0   	  -2.994802628913	  -2.615755947373	  -0.989023538710
39    6    0   	  -4.313898614550	  -1.665536972950	   0.460509478069
40    1    0   	  -5.135713958095	  -1.807654075498	  -0.247458932977
41    1    0   	  -4.722016051172	  -1.939250265728	   1.442172902190
42    6    0   	  -2.782244804590	   2.934662952660	  -0.842090283030
43    1    0   	  -2.692533239351	   3.967008642409	  -0.490356354077
44    1    0   	  -3.140509912147	   2.994552760051	  -1.876947470240
45    6    0   	  -3.904328503411	  -0.212376468506	   0.524663113052
46    1    0   	  -1.405343248799	   1.355100163786	  -1.465863453576
47    6    0   	  -4.202634452982	   0.790418721966	  -0.324222168439
48    1    0   	  -3.361232084596	   0.068923950751	   1.427719400723
49    6    0   	  -3.849263590745	   2.223606322874	   0.041280099995
50    1    0   	  -3.504526787939	   2.254543015808	   1.080626195015
51    1    0   	  -4.767902794015	   2.825763769526	  -0.004241585729
52    6    0   	  -4.953862050885	   0.614652926858	  -1.622460955507
53    1    0   	  -5.198278630795	  -0.427162771613	  -1.838981484664
54    1    0   	  -5.891117873164	   1.185513010061	  -1.607396100017
55    1    0   	  -4.372105824699	   0.999238297327	  -2.469645653217
56    6    0   	   4.911871443538	   0.960362865691	   0.589678660467
57    1    0   	   1.206666329446	   1.448686427774	  -1.092860946193
58    6    0   	   5.394697563096	   1.283838548547	   1.982041896999
59    1    0   	   6.338271753156	   1.842069759298	   1.942128446151
60    1    0   	   4.676079598761	   1.928050462948	   2.504376259106
61    1    0   	   5.556267147479	   0.385947645666	   2.583939141633
62    6    0   	   4.693125602160	   2.162598406843	  -0.293504754670
63    1    0   	   4.062149901939	   2.902138397571	   0.213281313528
64    1    0   	   5.651163474578	   2.660036912714	  -0.491156303911
65    1    0   	   4.237605903746	   1.930648582317	  -1.258174312089
66    1    0   	  -0.807609168960	  -2.713453151730	  -0.900396685152
---------------------------------------------------------------------
SCF Done:  E(scf) =  -977.111513352011     A.U.


IRC-IRC-IRC-IRC-IRC-IRC-IRC-IRC-IRC-IRC-IRC-IRC-IRC-IRC-IRC-IRC-IRC-IRC
Pt  17  Step number   1 out of a maximum of  2608
NET REACTION COORDINATE UP TO THIS POINT =    17.00000
IRC-IRC-IRC-IRC-IRC-IRC-IRC-IRC-IRC-IRC-IRC-IRC-IRC-IRC-IRC-IRC-IRC-IRC
                         Input orientation:
---------------------------------------------------------------------
Center     Atomic      Atomic             Coordinates (Angstroms)
Number     Number       Type             X           Y           Z
---------------------------------------------------------------------
1     6    0   	  -0.744697872341	  -2.615550350873	   0.182402871438
2     6    0   	   0.627095861905	  -2.467403934198	   0.738725791465
3     6    0   	   1.911781451403	  -1.348950164785	  -1.043001556355
4     6    0   	   1.366095204559	  -1.041560797930	   0.266449355199
5     6    0   	   0.345028782761	   0.100247030309	   0.392601562131
6     6    0   	   0.797409003909	   1.499666662394	  -0.070062305280
7     1    0   	   0.634871356321	  -2.381669052343	   1.826402495372
8     1    0   	   1.288598874344	  -3.295347670453	   0.468092529269
9     1    0   	   2.197738013168	  -0.944555136422	   0.974682106392
10    1    0   	  -0.559595095390	  -0.175722247586	  -0.149222729933
11    1    0   	   0.042988003652	   0.150816196190	   1.445244273358
12    1    0   	   1.610704967850	   1.863602653135	   0.567072393478
13    6    0   	   4.751598185187	  -0.319366222678	   0.203391482892
14    1    0   	   4.993571851760	  -1.092531965317	   0.933964926339
15    6    0   	   4.389250866531	  -0.836187200555	  -1.153576823404
16    1    0   	   4.124766772015	  -0.040481315100	  -1.854171201834
17    1    0   	   5.247266101802	  -1.362352654727	  -1.590105301570
18    6    0   	   3.248458152259	  -1.956618771358	  -1.149165730281
19    1    0   	   3.454660714019	  -2.610448855599	  -0.295424814149
20    1    0   	   3.342035508604	  -2.527606634227	  -2.076804031672
21    6    0   	   1.154774674106	  -1.143208430753	  -2.298825291829
22    1    0   	   0.274018119808	  -0.513051458080	  -2.198647463634
23    1    0   	   1.815791283773	  -0.753373581061	  -3.083153134499
24    1    0   	   0.842414028395	  -2.135615297366	  -2.664570085370
25    6    0   	  -1.917169134483	  -2.609663404673	   0.856762220773
26    6    0   	  -2.041200758442	  -2.582703530253	   2.358160279714
27    1    0   	  -2.596611022840	  -3.466499412053	   2.696579825288
28    1    0   	  -1.082553396305	  -2.581206480058	   2.879582808777
29    1    0   	  -2.612416744824	  -1.711910482424	   2.695857808433
30    6    0   	  -0.382505763643	   2.471658689336	  -0.031078266528
31    6    0   	  -1.451929324458	   2.229013511227	  -0.810305259438
32    6    0   	  -0.262270913802	   3.616207731903	   0.943266393760
33    1    0   	   0.603403486728	   4.245024649528	   0.697381692660
34    1    0   	  -1.145276697582	   4.257149415044	   0.958523203326
35    1    0   	  -0.099661591773	   3.246366924122	   1.964675059898
36    6    0   	  -3.214551045023	  -2.699856382666	   0.077957629622
37    1    0   	  -3.647816235055	  -3.699064273041	   0.231958102812
38    1    0   	  -2.994896356877	  -2.614934532723	  -0.991916417422
39    6    0   	  -4.314885169378	  -1.664596586497	   0.456724236888
40    1    0   	  -5.135912460560	  -1.805479254401	  -0.252403798016
41    1    0   	  -4.724482725239	  -1.938752997802	   1.437649014636
42    6    0   	  -2.778920299803	   2.936094508174	  -0.839997170184
43    1    0   	  -2.688954316080	   3.967972843010	  -0.486932230456
44    1    0   	  -3.136310054784	   2.997456244916	  -1.875058571603
45    6    0   	  -3.904243034361	  -0.211813028286	   0.522596433436
46    1    0   	  -1.401325244953	   1.357810706459	  -1.466055850204
47    6    0   	  -4.200895197496	   0.792000381784	  -0.325666350169
48    1    0   	  -3.361953308539	   0.068267482775	   1.426515884838
49    6    0   	  -3.847026283445	   2.224589134393	   0.041684162376
50    1    0   	  -3.503143979482	   2.254188659700	   1.081352095821
51    1    0   	  -4.765315598677	   2.827279295082	  -0.003919128372
52    6    0   	  -4.950780095951	   0.618012767410	  -1.624917824127
53    1    0   	  -5.195734426814	  -0.423417176522	  -1.842684183155
54    1    0   	  -5.887621070251	   1.189566721641	  -1.610393543829
55    1    0   	  -4.367765832404	   1.002944783825	  -2.471079510345
56    6    0   	   4.910248697479	   0.965620304718	   0.583587952935
57    1    0   	   1.208007090481	   1.446851066703	  -1.088253302073
58    6    0   	   5.391824528272	   1.295369087744	   1.974919584517
59    1    0   	   6.335181297509	   1.853844901035	   1.933337868642
60    1    0   	   4.672502073205	   1.941518364081	   2.493883601561
61    1    0   	   5.553311819609	   0.400175395075	   2.580847151949
62    6    0   	   4.691623711205	   2.163975542642	  -0.304910856920
63    1    0   	   4.059499972331	   2.905163242381	   0.198023418689
64    1    0   	   5.649509123393	   2.661296202240	  -0.503579533732
65    1    0   	   4.237363123499	   1.927651319239	  -1.269113102186
66    1    0   	  -0.807996548561	  -2.714685558060	  -0.900937938000
---------------------------------------------------------------------
SCF Done:  E(scf) =  -977.111509455659     A.U.


IRC-IRC-IRC-IRC-IRC-IRC-IRC-IRC-IRC-IRC-IRC-IRC-IRC-IRC-IRC-IRC-IRC-IRC
Pt  18  Step number   1 out of a maximum of  2608
NET REACTION COORDINATE UP TO THIS POINT =    18.00000
IRC-IRC-IRC-IRC-IRC-IRC-IRC-IRC-IRC-IRC-IRC-IRC-IRC-IRC-IRC-IRC-IRC-IRC
                         Input orientation:
---------------------------------------------------------------------
Center     Atomic      Atomic             Coordinates (Angstroms)
Number     Number       Type             X           Y           Z
---------------------------------------------------------------------
1     6    0   	  -0.746145512253	  -2.617334388677	   0.181936247471
2     6    0   	   0.625141428481	  -2.470524740298	   0.739783273552
3     6    0   	   1.912365143405	  -1.351408353970	  -1.039251750453
4     6    0   	   1.365523024933	  -1.044409172274	   0.269745653254
5     6    0   	   0.344857560137	   0.097748053152	   0.395717948842
6     6    0   	   0.798552217158	   1.497274447642	  -0.065366694877
7     1    0   	   0.631927800224	  -2.385731895370	   1.827540325548
8     1    0   	   1.286484018568	  -3.298559054828	   0.469051901145
9     1    0   	   2.196304565386	  -0.948448284151	   0.979069066206
10    1    0   	  -0.559322116979	  -0.177223015391	  -0.147371425933
11    1    0   	   0.041699306255	   0.147592921328	   1.448075297649
12    1    0   	   1.611829371353	   1.859996942753	   0.572482247146
13    6    0   	   4.750868615617	  -0.315779957218	   0.202694500949
14    1    0   	   4.992691296112	  -1.085677745438	   0.936760802822
15    6    0   	   4.389757926109	  -0.838538013961	  -1.152354648246
16    1    0   	   4.125711757887	  -0.045895174121	  -1.856567496022
17    1    0   	   5.248239020353	  -1.366431500005	  -1.585875563284
18    6    0   	   3.249129276824	  -1.959067865479	  -1.144427664705
19    1    0   	   3.455782028593	  -2.610835269133	  -0.289234968240
20    1    0   	   3.342470582401	  -2.532126551532	  -2.070838084078
21    6    0   	   1.156328331709	  -1.145502631020	  -2.295642570584
22    1    0   	   0.276007654818	  -0.514613210432	  -2.196183597164
23    1    0   	   1.818112316371	  -0.756491145545	  -3.079708402577
24    1    0   	   0.843292620034	  -2.137767392183	  -2.661189349951
25    6    0   	  -1.919351288624	  -2.610861132120	   0.855025866385
26    6    0   	  -2.045008675034	  -2.584724922757	   2.356297174739
27    1    0   	  -2.601276166126	  -3.468421869637	   2.693568379536
28    1    0   	  -1.086929863066	  -2.584071855005	   2.878769178060
29    1    0   	  -2.616117997551	  -1.713828349249	   2.693896457657
30    6    0   	  -0.380824655667	   2.469826900886	  -0.026000590369
31    6    0   	  -1.448895549262	   2.229751580928	  -0.807870439076
32    6    0   	  -0.262069688613	   3.611470204037	   0.951924831619
33    1    0   	   0.604228232418	   4.240767603650	   0.709503903617
34    1    0   	  -1.144938467360	   4.252598903767	   0.967432197645
35    1    0   	  -0.101459312652	   3.238598901929	   1.972547009753
36    6    0   	  -3.215926838822	  -2.699530200649	   0.074704435576
37    1    0   	  -3.650149732240	  -3.698499308986	   0.227548135444
38    1    0   	  -2.994985795548	  -2.614073452059	  -0.994861277777
39    6    0   	  -4.315887018598	  -1.663658780084	   0.452895589194
40    1    0   	  -5.136118308070	  -1.803298163760	  -0.257398040953
41    1    0   	  -4.726968655910	  -1.938277571312	   1.433071379981
42    6    0   	  -2.775546715716	   2.937494908709	  -0.837846016168
43    1    0   	  -2.685329649516	   3.968906137808	  -0.483457642936
44    1    0   	  -3.132000638162	   3.000320392520	  -1.873130894554
45    6    0   	  -3.904184184839	  -0.211253256362	   0.520514785596
46    1    0   	  -1.397320061010	   1.360377092651	  -1.465983725528
47    6    0   	  -4.199162686449	   0.793582349758	  -0.327122560525
48    1    0   	  -3.362725507859	   0.067600651674	   1.425310772863
49    6    0   	  -3.844800885855	   2.225567568474	   0.042089620431
50    1    0   	  -3.501831353597	   2.253831477645	   1.082095940872
51    1    0   	  -4.762727863778	   2.828803946508	  -0.003650326465
52    6    0   	  -4.947669919903	   0.621380891288	  -1.627403294617
53    1    0   	  -5.193145976353	  -0.419661347022	  -1.846433534129
54    1    0   	  -5.884100099104	   1.193620666279	  -1.613433781364
55    1    0   	  -4.363382169017	   1.006672574876	  -2.472522012913
56    6    0   	   4.908579340174	   0.970902132173	   0.577412374737
57    1    0   	   1.209500418414	   1.445035742142	  -1.083431196001
58    6    0   	   5.388871217475	   1.306992211378	   1.967677330778
59    1    0   	   6.331995781675	   1.865731138509	   1.924417061750
60    1    0   	   4.668818631728	   1.955063854030	   2.483225205032
61    1    0   	   5.550288247787	   0.414542637079	   2.577662411152
62    6    0   	   4.690044558159	   2.165310174504	  -0.316434820017
63    1    0   	   4.056699480927	   2.908100933556	   0.182585198371
64    1    0   	   5.647753950571	   2.662567445607	  -0.516090422092
65    1    0   	   4.237108661417	   1.924550314875	  -1.280164259886
66    1    0   	  -0.808384519657	  -2.715909651647	  -0.901508270301
---------------------------------------------------------------------
SCF Done:  E(scf) =  -977.111505242387     A.U.


IRC-IRC-IRC-IRC-IRC-IRC-IRC-IRC-IRC-IRC-IRC-IRC-IRC-IRC-IRC-IRC-IRC-IRC
Pt  19  Step number   1 out of a maximum of  2608
NET REACTION COORDINATE UP TO THIS POINT =    19.00000
IRC-IRC-IRC-IRC-IRC-IRC-IRC-IRC-IRC-IRC-IRC-IRC-IRC-IRC-IRC-IRC-IRC-IRC
                         Input orientation:
---------------------------------------------------------------------
Center     Atomic      Atomic             Coordinates (Angstroms)
Number     Number       Type             X           Y           Z
---------------------------------------------------------------------
1     6    0   	  -0.747596982487	  -2.619118820624	   0.181443843767
2     6    0   	   0.623176083955	  -2.473668461053	   0.740829646015
3     6    0   	   1.912964368307	  -1.353843506458	  -1.035463123533
4     6    0   	   1.364949138676	  -1.047271554266	   0.273081269629
5     6    0   	   0.344686344165	   0.095232623077	   0.398890221148
6     6    0   	   0.799723071887	   1.494879637372	  -0.060532262188
7     1    0   	   0.628963400056	  -2.389848500902	   1.828667750219
8     1    0   	   1.284357359020	  -3.301787859658	   0.469981838180
9     1    0   	   2.194857863781	  -0.952380770589	   0.983508842680
10    1    0   	  -0.559026116690	  -0.178718869138	  -0.145506312832
11    1    0   	   0.040370768038	   0.144311360087	   1.450950629655
12    1    0   	   1.612919295252	   1.856367885971	   0.578119382631
13    6    0   	   4.750146494981	  -0.312189949086	   0.201982849974
14    1    0   	   4.991829409836	  -1.078776518464	   0.939553671814
15    6    0   	   4.390295503091	  -0.840926783585	  -1.151109312433
16    1    0   	   4.126721870224	  -0.051386738602	  -1.858967252282
17    1    0   	   5.249240572954	  -1.370569659591	  -1.581570440146
18    6    0   	   3.249804886686	  -1.961517839554	  -1.139650792228
19    1    0   	   3.456895976444	  -2.611221516970	  -0.283009649388
20    1    0   	   3.342894604590	  -2.536649935023	  -2.064828455962
21    6    0   	   1.157920946557	  -1.147718584426	  -2.292425035433
22    1    0   	   0.278081967000	  -0.516033017181	  -2.193690272408
23    1    0   	   1.820500271911	  -0.759589707952	  -3.076231709417
24    1    0   	   0.844129647373	  -2.139820050121	  -2.657763479392
25    6    0   	  -1.921541858169	  -2.612065459059	   0.853253202698
26    6    0   	  -2.048838181796	  -2.586775564899	   2.354394985045
27    1    0   	  -2.605968535330	  -3.470375062777	   2.690498859939
28    1    0   	  -1.091333964777	  -2.586978291583	   2.877923851409
29    1    0   	  -2.619839705797	  -1.715777936674	   2.691904245525
30    6    0   	  -0.379109434739	   2.468007719569	  -0.020867496307
31    6    0   	  -1.445852171085	   2.230429981348	  -0.805307714686
32    6    0   	  -0.261775684305	   3.606879781843	   0.960453791875
33    1    0   	   0.605159473656	   4.236577710529	   0.721384652753
34    1    0   	  -1.144481179926	   4.248233125595	   0.976135172462
35    1    0   	  -0.103155090970	   3.231126884925	   1.980330004507
36    6    0   	  -3.217301946604	  -2.699197448478	   0.071404258901
37    1    0   	  -3.652475155411	  -3.697933261714	   0.223063056655
38    1    0   	  -2.995066400947	  -2.613180011205	  -0.997847632038
39    6    0   	  -4.316898276939	  -1.662732010234	   0.449036419015
40    1    0   	  -5.136328206638	  -1.801124530904	  -0.262425310027
41    1    0   	  -4.729462986760	  -1.937831819509	   1.428455581409
42    6    0   	  -2.772145782922	   2.938861537812	  -0.835641798276
43    1    0   	  -2.681682984039	   3.969807056608	  -0.479939703192
44    1    0   	  -3.127611653584	   3.003139418241	  -1.871167128482
45    6    0   	  -3.904151087999	  -0.210703736547	   0.518425780690
46    1    0   	  -1.393350941021	   1.362796593261	  -1.465657173405
47    6    0   	  -4.197446004381	   0.795155963816	  -0.328582682287
48    1    0   	  -3.363542411170	   0.066920187533	   1.424107713236
49    6    0   	  -3.842599585337	   2.226535176305	   0.042500359911
50    1    0   	  -3.500593722519	   2.253467642444	   1.082859333970
51    1    0   	  -4.760154785166	   2.830327276440	  -0.003425437440
52    6    0   	  -4.944549908449	   0.624743975533	  -1.629903859326
53    1    0   	  -5.190528129155	  -0.415910233181	  -1.850213267753
54    1    0   	  -5.880576566498	   1.197656447462	  -1.616496484022
55    1    0   	  -4.358981674539	   1.010411073858	  -2.473964528990
56    6    0   	   4.906871366039	   0.976180347804	   0.571180680987
57    1    0   	   1.211128548101	   1.443252391946	  -1.078429464630
58    6    0   	   5.385852916247	   1.318661588461	   1.960346807076
59    1    0   	   6.328742509254	   1.877663719308	   1.915402734219
60    1    0   	   4.665058773417	   1.968652289691	   2.472434360173
61    1    0   	   5.547193996468	   0.428997178381	   2.574412291434
62    6    0   	   4.688390906431	   2.166586425290	  -0.328031541169
63    1    0   	   4.053731763878	   2.910915089633	   0.167014121057
64    1    0   	   5.645893767796	   2.663857713280	  -0.528623356061
65    1    0   	   4.236865093250	   1.921335423820	  -1.291291735319
66    1    0   	  -0.808766373687	  -2.717114452218	  -0.902105590054
---------------------------------------------------------------------
SCF Done:  E(scf) =  -977.111500726256     A.U.


IRC-IRC-IRC-IRC-IRC-IRC-IRC-IRC-IRC-IRC-IRC-IRC-IRC-IRC-IRC-IRC-IRC-IRC
Pt  20  Step number   1 out of a maximum of  2608
NET REACTION COORDINATE UP TO THIS POINT =    20.00000
IRC-IRC-IRC-IRC-IRC-IRC-IRC-IRC-IRC-IRC-IRC-IRC-IRC-IRC-IRC-IRC-IRC-IRC
                         Input orientation:
---------------------------------------------------------------------
Center     Atomic      Atomic             Coordinates (Angstroms)
Number     Number       Type             X           Y           Z
---------------------------------------------------------------------
1     6    0   	  -0.749000407413	  -2.620842085929	   0.180957452497
2     6    0   	   0.621267863269	  -2.476721248546	   0.741848754279
3     6    0   	   1.913557100233	  -1.356182737619	  -1.031760852658
4     6    0   	   1.364396103044	  -1.050050312892	   0.276347250886
5     6    0   	   0.344525037079	   0.092789042926	   0.402010343278
6     6    0   	   0.800881653895	   1.492563465930	  -0.055738402211
7     1    0   	   0.626075635498	  -2.393859752961	   1.829765356175
8     1    0   	   1.282293009146	  -3.304921128013	   0.470882454841
9     1    0   	   2.193453902802	  -0.956213297005	   0.987850869707
10    1    0   	  -0.558717063926	  -0.180160843638	  -0.143683389924
11    1    0   	   0.039058196094	   0.141094163903	   1.453774323666
12    1    0   	   1.613945878792	   1.852843316466	   0.583764249683
13    6    0   	   4.749472509140	  -0.308718515365	   0.201258275685
14    1    0   	   4.991065200036	  -1.072082676528	   0.942202931822
15    6    0   	   4.390825025441	  -0.843248636616	  -1.149911226108
16    1    0   	   4.127697301891	  -0.056726707032	  -1.861288387123
17    1    0   	   5.250211357735	  -1.374578759647	  -1.577415913328
18    6    0   	   3.250463382821	  -1.963886592769	  -1.134998824413
19    1    0   	   3.457985334034	  -2.611582347515	  -0.276955922060
20    1    0   	   3.343291739212	  -2.541033567237	  -2.058975958380
21    6    0   	   1.159490294735	  -1.149804313906	  -2.289277288324
22    1    0   	   0.280167396695	  -0.517278564097	  -2.191251295816
23    1    0   	   1.822862928627	  -0.762606246158	  -3.072847898117
24    1    0   	   0.844877437413	  -2.141730671514	  -2.654383804182
25    6    0   	  -1.923667620036	  -2.613233757889	   0.851513099498
26    6    0   	  -2.052569477845	  -2.588781068689	   2.352526439246
27    1    0   	  -2.610535890781	  -3.472291059495	   2.687481945772
28    1    0   	  -1.095629286165	  -2.589815506044	   2.877089483691
29    1    0   	  -2.623473517558	  -1.717691361983	   2.689951701979
30    6    0   	  -0.377418873024	   2.466261994297	  -0.015859268653
31    6    0   	  -1.442904303324	   2.231027800139	  -0.802713229925
32    6    0   	  -0.261398639812	   3.602584431232	   0.968571802022
33    1    0   	   0.606155276906	   4.232606597404	   0.732621959729
34    1    0   	  -1.143928674775	   4.244180103477	   0.984365908952
35    1    0   	  -0.104670167469	   3.224186817294	   1.987764646607
36    6    0   	  -3.218626691119	  -2.698871259542	   0.068169936879
37    1    0   	  -3.654711323394	  -3.697387265337	   0.218655922103
38    1    0   	  -2.995126144260	  -2.612289087948	  -1.000772589457
39    6    0   	  -4.317885004432	  -1.661849174754	   0.445268062342
40    1    0   	  -5.136529871220	  -1.799034556667	  -0.267331634786
41    1    0   	  -4.731889621313	  -1.937431435767	   1.423945894292
42    6    0   	  -2.768834586685	   2.940150773288	  -0.833462758577
43    1    0   	  -2.678137383155	   3.970646573629	  -0.476497277768
44    1    0   	  -3.123295427853	   3.005825092522	  -1.869236769042
45    6    0   	  -3.904145803820	  -0.210183924567	   0.516392522420
46    1    0   	  -1.389554133472	   1.364992377544	  -1.465104800176
47    6    0   	  -4.195803630569	   0.796668488901	  -0.330004277883
48    1    0   	  -3.364378542050	   0.066247618915	   1.422941316015
49    6    0   	  -3.840497610754	   2.227459360110	   0.042898565820
50    1    0   	  -3.499472205725	   2.253107482970	   1.083612428677
51    1    0   	  -4.757684185510	   2.831797914026	  -0.003253578529
52    6    0   	  -4.941523138803	   0.627990933395	  -1.632344270824
53    1    0   	  -5.187968666585	  -0.412287618659	  -1.853906453648
54    1    0   	  -5.877165931155	   1.201542459423	  -1.619490320308
55    1    0   	  -4.354707280096	   1.014036127243	  -2.475365949508
56    6    0   	   4.905190136904	   0.981274768600	   0.565109444161
57    1    0   	   1.212821977907	   1.441554364318	  -1.073438460933
58    6    0   	   5.382909756009	   1.329953695848	   1.953185415285
59    1    0   	   6.325533971861	   1.889269077772	   1.906597090496
60    1    0   	   4.661366358506	   1.981735628368	   2.461944139987
61    1    0   	   5.544246551802	   0.442997901561	   2.571173980387
62    6    0   	   4.686690002728	   2.167785408774	  -0.339273258438
63    1    0   	   4.050735338011	   2.913556158706	   0.151939901735
64    1    0   	   5.643965339819	   2.665114572209	  -0.540788731293
65    1    0   	   4.236521324253	   1.918174404291	  -1.302057953507
66    1    0   	  -0.809122321622	  -2.718263386943	  -0.902694540305
---------------------------------------------------------------------
SCF Done:  E(scf) =  -977.111496075430     A.U.


IRC-IRC-IRC-IRC-IRC-IRC-IRC-IRC-IRC-IRC-IRC-IRC-IRC-IRC-IRC-IRC-IRC-IRC
Pt  21  Step number   1 out of a maximum of  2608
NET REACTION COORDINATE UP TO THIS POINT =    21.00000
IRC-IRC-IRC-IRC-IRC-IRC-IRC-IRC-IRC-IRC-IRC-IRC-IRC-IRC-IRC-IRC-IRC-IRC
                         Input orientation:
---------------------------------------------------------------------
Center     Atomic      Atomic             Coordinates (Angstroms)
Number     Number       Type             X           Y           Z
---------------------------------------------------------------------
1     6    0   	  -0.750730130838	  -2.622943341112	   0.180312480545
2     6    0   	   0.618892415742	  -2.480497210009	   0.743101551338
3     6    0   	   1.914342546472	  -1.359036338679	  -1.027099359957
4     6    0   	   1.363714216969	  -1.053478928754	   0.280450762955
5     6    0   	   0.344323150687	   0.089768275753	   0.405928288901
6     6    0   	   0.802339285081	   1.489718104794	  -0.049634858033
7     1    0   	   0.622459651442	  -2.398854467355	   1.831112856289
8     1    0   	   1.279728267690	  -3.308789612492	   0.471978063795
9     1    0   	   2.191686074327	  -0.960973632449	   0.993317911080
10    1    0   	  -0.558291537438	  -0.181918361561	  -0.141439480385
11    1    0   	   0.037358519847	   0.137065319054	   1.457300323394
12    1    0   	   1.615160554250	   1.848477218261	   0.591027136243
13    6    0   	   4.748662082927	  -0.304432058547	   0.200359615889
14    1    0   	   4.990154842124	  -1.063694038872	   0.945513099029
15    6    0   	   4.391579222969	  -0.846238758317	  -1.148331328204
16    1    0   	   4.129107783740	  -0.063555476767	  -1.864133038735
17    1    0   	   5.251513446060	  -1.379709433781	  -1.572028630801
18    6    0   	   3.251309231228	  -1.966832153289	  -1.129124452996
19    1    0   	   3.459311666417	  -2.612030373015	  -0.269343613154
20    1    0   	   3.343796062098	  -2.546493501343	  -2.051590067866
21    6    0   	   1.161548033884	  -1.152271684468	  -2.285325264211
22    1    0   	   0.282919087846	  -0.518631885372	  -2.188200859325
23    1    0   	   1.825955042270	  -0.766287438264	  -3.068582284683
24    1    0   	   0.845833924816	  -2.143948863127	  -2.650154933998
25    6    0   	  -1.926301628125	  -2.614680934791	   0.849290367471
26    6    0   	  -2.057223971125	  -2.591323450735	   2.350136602437
27    1    0   	  -2.616212579257	  -3.474742671156	   2.683622401685
28    1    0   	  -1.100997465156	  -2.593390292812	   2.875997468654
29    1    0   	  -2.628030381187	  -1.720143176173	   2.687479236836
30    6    0   	  -0.375302701335	   2.464130728189	  -0.009575974464
31    6    0   	  -1.439256567271	   2.231713753310	  -0.799320857752
32    6    0   	  -0.260852365314	   3.597442156833	   0.978489682934
33    1    0   	   0.607472895803	   4.227772863712	   0.746275735783
34    1    0   	  -1.143138703148	   4.239375383028	   0.994343077729
35    1    0   	  -0.106450885240	   3.215939484607	   1.996871118633
36    6    0   	  -3.220244385650	  -2.698450108051	   0.064072322023
37    1    0   	  -3.657439777536	  -3.696704012120	   0.213050438798
38    1    0   	  -2.995156782359	  -2.611119938010	  -1.004473547898
39    6    0   	  -4.319106192955	  -1.660773289354	   0.440535001305
40    1    0   	  -5.136761502030	  -1.796453882707	  -0.273483210788
41    1    0   	  -4.734898764758	  -1.936989331422	   1.418274507003
42    6    0   	  -2.764719419490	   2.941715582780	  -0.830657804339
43    1    0   	  -2.673746292429	   3.971649478005	  -0.472125431765
44    1    0   	  -3.117875194346	   3.009117754722	  -1.866753774591
45    6    0   	  -3.904169042018	  -0.209559420174	   0.513860021589
46    1    0   	  -1.384902260725	   1.367562122902	  -1.464093533822
47    6    0   	  -4.193790402562	   0.798533506059	  -0.331756372839
48    1    0   	  -3.365468805723	   0.065379069592	   1.421493664036
49    6    0   	  -3.837931727716	   2.228585004401	   0.043431453257
50    1    0   	  -3.498179128551	   2.252632662257	   1.084596961350
51    1    0   	  -4.754651736542	   2.833609340549	  -0.003044932402
52    6    0   	  -4.937761745960	   0.632024820543	  -1.635367977146
53    1    0   	  -5.184763221845	  -0.407782530248	  -1.858511519924
54    1    0   	  -5.872934380835	   1.206355411264	  -1.623200197005
55    1    0   	  -4.349392812803	   1.018561430017	  -2.477077812613
56    6    0   	   4.903033162010	   0.987546575618	   0.557477266192
57    1    0   	   1.215070604368	   1.439525522464	  -1.067039869140
58    6    0   	   5.379123537560	   1.344024069090	   1.944114479506
59    1    0   	   6.321412445871	   1.903723389821	   1.895468174562
60    1    0   	   4.656625900045	   1.998015405637	   2.448643936712
61    1    0   	   5.540440283934	   0.460528213168	   2.567016060236
62    6    0   	   4.684441492249	   2.169088609811	  -0.353355198956
63    1    0   	   4.046725023951	   2.916524801179	   0.132988461168
64    1    0   	   5.641376779463	   2.666619152642	  -0.555957297382
65    1    0   	   4.236094692245	   1.913953579730	  -1.315523521183
66    1    0   	  -0.809528838052	  -2.719609313613	  -0.903468272282
---------------------------------------------------------------------
SCF Done:  E(scf) =  -977.111489906913     A.U.


IRC-IRC-IRC-IRC-IRC-IRC-IRC-IRC-IRC-IRC-IRC-IRC-IRC-IRC-IRC-IRC-IRC-IRC
Pt  22  Step number   1 out of a maximum of  2608
NET REACTION COORDINATE UP TO THIS POINT =    22.00000
IRC-IRC-IRC-IRC-IRC-IRC-IRC-IRC-IRC-IRC-IRC-IRC-IRC-IRC-IRC-IRC-IRC-IRC
                         Input orientation:
---------------------------------------------------------------------
Center     Atomic      Atomic             Coordinates (Angstroms)
Number     Number       Type             X           Y           Z
---------------------------------------------------------------------
1     6    0   	  -0.752190461337	  -2.624706952904	   0.179740049399
2     6    0   	   0.616875615094	  -2.483686113749	   0.744159910238
3     6    0   	   1.915017005278	  -1.361415811106	  -1.023122246957
4     6    0   	   1.363138103696	  -1.056364806773	   0.283956285014
5     6    0   	   0.344155765858	   0.087225700502	   0.409295631397
6     6    0   	   0.803589953071	   1.487337709915	  -0.044358636290
7     1    0   	   0.619374739219	  -2.403091535239	   1.832252504876
8     1    0   	   1.277556898589	  -3.312051012934	   0.472900464694
9     1    0   	   2.190186810578	  -0.965011024692	   0.997986132141
10    1    0   	  -0.557916121778	  -0.183378943422	  -0.139513503560
11    1    0   	   0.035901585239	   0.133637961815	   1.460330515408
12    1    0   	   1.616159804862	   1.844797924881	   0.597348580162
13    6    0   	   4.748001027435	  -0.300843481467	   0.199616838068
14    1    0   	   4.989410433001	  -1.056588654408	   0.948379370460
15    6    0   	   4.392274596807	  -0.848883551075	  -1.146956732279
16    1    0   	   4.130452516507	  -0.069488742387	  -1.866580848592
17    1    0   	   5.252659593756	  -1.384258812404	  -1.567337958316
18    6    0   	   3.252004283209	  -1.969359283066	  -1.124111577941
19    1    0   	   3.460370559091	  -2.612453028972	  -0.262855792744
20    1    0   	   3.344172797878	  -2.551156871842	  -2.045296786715
21    6    0   	   1.163331759577	  -1.154247810991	  -2.281955121972
22    1    0   	   0.285333259115	  -0.519605860307	  -2.185594168562
23    1    0   	   1.828650497189	  -0.769325429009	  -3.064932204987
24    1    0   	   0.846617296161	  -2.145684292932	  -2.646571425257
25    6    0   	  -1.928536484084	  -2.615917402980	   0.847367017558
26    6    0   	  -2.061186812107	  -2.593520430238	   2.348070490757
27    1    0   	  -2.621034546506	  -3.476875753167	   2.680287976646
28    1    0   	  -1.105570399437	  -2.596461453057	   2.875041143153
29    1    0   	  -2.631923560040	  -1.722276446223	   2.685354309085
30    6    0   	  -0.373490512298	   2.462367493605	  -0.004208464326
31    6    0   	  -1.436189975711	   2.232254558217	  -0.796325104500
32    6    0   	  -0.260289305531	   3.593271023661	   0.986767352615
33    1    0   	   0.608712091677	   4.223791771811	   0.757598346165
34    1    0   	  -1.142338521273	   4.235533332530	   1.002600323027
35    1    0   	  -0.107845990455	   3.209280568836	   2.004515206351
36    6    0   	  -3.221608408357	  -2.698103670257	   0.060544411123
37    1    0   	  -3.659729230668	  -3.696146828401	   0.208215441954
38    1    0   	  -2.995166119055	  -2.610108748176	  -1.007660547653
39    6    0   	  -4.320155644626	  -1.659900406146	   0.436483853351
40    1    0   	  -5.136965248019	  -1.794303898228	  -0.278745151565
41    1    0   	  -4.737465147760	  -1.936682779381	   1.413419184293
42    6    0   	  -2.761245773206	   2.943015398912	  -0.828211430517
43    1    0   	  -2.670048933537	   3.972472152474	  -0.468347749920
44    1    0   	  -3.113255787862	   3.011881360831	  -1.864594851994
45    6    0   	  -3.904227226153	  -0.209063930418	   0.511707079189
46    1    0   	  -1.381040776253	   1.369608627147	  -1.463003621042
47    6    0   	  -4.192118132313	   0.800088853272	  -0.333239522104
48    1    0   	  -3.366452112021	   0.064602046411	   1.420274755358
49    6    0   	  -3.835808256391	   2.229512588789	   0.043906854662
50    1    0   	  -3.497176412865	   2.252199741152	   1.085468718553
51    1    0   	  -4.752129926872	   2.835119271265	  -0.002880122534
52    6    0   	  -4.934582304059	   0.635426693204	  -1.637944771622
53    1    0   	  -5.182028708528	  -0.403982703685	  -1.862451676197
54    1    0   	  -5.869369801693	   1.210396373616	  -1.626362882513
55    1    0   	  -4.344892129371	   1.022408828417	  -2.478525908511
56    6    0   	   4.901199795704	   0.992838521470	   0.550970132826
57    1    0   	   1.217068521384	   1.437864106410	  -1.061483755704
58    6    0   	   5.375893398495	   1.356003208857	   1.936374803177
59    1    0   	   6.317915254662	   1.915997032416	   1.885962144121
60    1    0   	   4.652597474891	   2.011923901637	   2.437262686464
61    1    0   	   5.537158717986	   0.475478997689	   2.563507158593
62    6    0   	   4.682501440277	   2.170122088668	  -0.365384458262
63    1    0   	   4.043180445786	   2.918927608790	   0.116753884909
64    1    0   	   5.639118268400	   2.667905539435	  -0.568844371150
65    1    0   	   4.235803831083	   1.910229082617	  -1.327058794975
66    1    0   	  -0.809853073114	  -2.720708289801	  -0.904152774438
---------------------------------------------------------------------
SCF Done:  E(scf) =  -977.111484325773     A.U.


IRC-IRC-IRC-IRC-IRC-IRC-IRC-IRC-IRC-IRC-IRC-IRC-IRC-IRC-IRC-IRC-IRC-IRC
Pt  23  Step number   1 out of a maximum of  2608
NET REACTION COORDINATE UP TO THIS POINT =    23.00000
IRC-IRC-IRC-IRC-IRC-IRC-IRC-IRC-IRC-IRC-IRC-IRC-IRC-IRC-IRC-IRC-IRC-IRC
                         Input orientation:
---------------------------------------------------------------------
Center     Atomic      Atomic             Coordinates (Angstroms)
Number     Number       Type             X           Y           Z
---------------------------------------------------------------------
1     6    0   	  -0.753658480682	  -2.626474325684	   0.179181965280
2     6    0   	   0.614829042101	  -2.486896413089	   0.745280532786
3     6    0   	   1.915691092139	  -1.363789530631	  -1.019038061942
4     6    0   	   1.362557167803	  -1.059278763519	   0.287574681577
5     6    0   	   0.343997475970	   0.084665379678	   0.412795862490
6     6    0   	   0.804879031715	   1.484938521278	  -0.038901735947
7     1    0   	   0.616221135082	  -2.407363833996	   1.833452896531
8     1    0   	   1.275360096757	  -3.315334775030	   0.473897488687
9     1    0   	   2.188675407208	  -0.969107930902	   1.002773475124
10    1    0   	  -0.557520397257	  -0.184836267505	  -0.137472390901
11    1    0   	   0.034437621406	   0.130171968432	   1.463486467559
12    1    0   	   1.617145738738	   1.841090221839	   0.603916309714
13    6    0   	   4.747401963003	  -0.297214661649	   0.198767350054
14    1    0   	   4.988864912566	  -1.049412499816	   0.951075736702
15    6    0   	   4.392937020800	  -0.851486206260	  -1.145614252759
16    1    0   	   4.131673901533	  -0.075407979175	  -1.869007741008
17    1    0   	   5.253753067812	  -1.388706151715	  -1.562748135429
18    6    0   	   3.252702174399	  -1.971864475944	  -1.119018644686
19    1    0   	   3.461485389040	  -2.612809502908	  -0.256280851469
20    1    0   	   3.344520365681	  -2.555828355266	  -2.038898349115
21    6    0   	   1.165111963052	  -1.156194074284	  -2.278470940127
22    1    0   	   0.287785139520	  -0.520496002930	  -2.182871650856
23    1    0   	   1.831347813686	  -0.772400826033	  -3.061191328924
24    1    0   	   0.847319374762	  -2.147378292123	  -2.642836996017
25    6    0   	  -1.930803309098	  -2.617166251990	   0.845409655947
26    6    0   	  -2.065246102595	  -2.595756752019	   2.345961260975
27    1    0   	  -2.625952641514	  -3.479060430559	   2.676868843576
28    1    0   	  -1.110264363938	  -2.599568010025	   2.874079702807
29    1    0   	  -2.635940060853	  -1.724463487132	   2.683177924631
30    6    0   	  -0.371626846605	   2.460608095480	   0.001250847714
31    6    0   	  -1.433093917545	   2.232723856645	  -0.793159425791
32    6    0   	  -0.259609543081	   3.589247906195	   0.994937490550
33    1    0   	   0.610059185530	   4.219892116439	   0.768667887781
34    1    0   	  -1.141407128751	   4.231860208045	   1.010700403385
35    1    0   	  -0.109073132959	   3.202930209724	   2.012087110154
36    6    0   	  -3.222966480546	  -2.697757798035	   0.056928135888
37    1    0   	  -3.662009130685	  -3.695594829334	   0.203246992330
38    1    0   	  -2.995123219628	  -2.609073246505	  -1.010921116140
39    6    0   	  -4.321223788401	  -1.659046127281	   0.432319669631
40    1    0   	  -5.137149344818	  -1.792163439201	  -0.284158065081
41    1    0   	  -4.740092232514	  -1.936417359084	   1.408421557110
42    6    0   	  -2.757716674733	   2.944281331877	  -0.825687862567
43    1    0   	  -2.666302782719	   3.973253169187	  -0.464479654409
44    1    0   	  -3.108500559824	   3.014622956518	  -1.862381580697
45    6    0   	  -3.904324429611	  -0.208588680787	   0.509492665674
46    1    0   	  -1.377197882240	   1.371484671674	  -1.461601498869
47    6    0   	  -4.190446903218	   0.801634482443	  -0.334776371772
48    1    0   	  -3.367524263683	   0.063791892844	   1.419022404943
49    6    0   	  -3.833706725624	   2.230421330602	   0.044367881289
50    1    0   	  -3.496278941579	   2.251737756966	   1.086349144291
51    1    0   	  -4.749617686866	   2.836621987709	  -0.002797649340
52    6    0   	  -4.931329686130	   0.638839265375	  -1.640612493378
53    1    0   	  -5.179199236809	  -0.400166898585	  -1.866517136976
54    1    0   	  -5.865734102488	   1.214442704565	  -1.629653449016
55    1    0   	  -4.340277464765	   1.026284505218	  -2.480022910031
56    6    0   	   4.899347160320	   0.998139813129	   0.544350267451
57    1    0   	   1.219196938102	   1.436191291063	  -1.055710301980
58    6    0   	   5.372755225471	   1.367996980687	   1.928432628964
59    1    0   	   6.314431195996	   1.928401836488	   1.876162075977
60    1    0   	   4.648635891364	   2.025704411660	   2.425777705560
61    1    0   	   5.534152461455	   0.490466764309	   2.559717130711
62    6    0   	   4.680338948115	   2.171126444411	  -0.377451004243
63    1    0   	   4.039448005319	   2.921221150115	   0.100584678936
64    1    0   	   5.636574219293	   2.669222595184	  -0.581915820750
65    1    0   	   4.235158410735	   1.906467347866	  -1.338531176203
66    1    0   	  -0.810144816934	  -2.721796187890	  -0.904824003724
---------------------------------------------------------------------
SCF Done:  E(scf) =  -977.111478390969     A.U.


IRC-IRC-IRC-IRC-IRC-IRC-IRC-IRC-IRC-IRC-IRC-IRC-IRC-IRC-IRC-IRC-IRC-IRC
Pt  24  Step number   1 out of a maximum of  2608
NET REACTION COORDINATE UP TO THIS POINT =    24.00000
IRC-IRC-IRC-IRC-IRC-IRC-IRC-IRC-IRC-IRC-IRC-IRC-IRC-IRC-IRC-IRC-IRC-IRC
                         Input orientation:
---------------------------------------------------------------------
Center     Atomic      Atomic             Coordinates (Angstroms)
Number     Number       Type             X           Y           Z
---------------------------------------------------------------------
1     6    0   	  -0.755124278000	  -2.628219706348	   0.178608403949
2     6    0   	   0.612765888395	  -2.490095825524	   0.746424479112
3     6    0   	   1.916386894408	  -1.366136619468	  -1.014884113123
4     6    0   	   1.361975427746	  -1.062181648555	   0.291255602339
5     6    0   	   0.343841047612	   0.082117085535	   0.416360796130
6     6    0   	   0.806185122458	   1.482558758039	  -0.033324764738
7     1    0   	   0.613019012319	  -2.411636232217	   1.834675254384
8     1    0   	   1.273153202476	  -3.318605518694	   0.474927391456
9     1    0   	   2.187148824621	  -0.973214961927	   1.007638556376
10    1    0   	  -0.557103409074	  -0.186269874549	  -0.135395622557
11    1    0   	   0.032944383402	   0.126694450982	   1.466696122852
12    1    0   	   1.618102744890	   1.837391843903	   0.610663005690
13    6    0   	   4.746850305989	  -0.293598281602	   0.197897316451
14    1    0   	   4.988416428487	  -1.042192239365	   0.953758228028
15    6    0   	   4.393643166832	  -0.854158557043	  -1.144233646740
16    1    0   	   4.132974747845	  -0.081447543131	  -1.871427852496
17    1    0   	   5.254877172369	  -1.393256803209	  -1.558068722777
18    6    0   	   3.253404071610	  -1.974384473350	  -1.113840830374
19    1    0   	   3.462585755032	  -2.613161206460	  -0.249610703754
20    1    0   	   3.344846923602	  -2.560540337992	  -2.032394985952
21    6    0   	   1.166948704730	  -1.158064017894	  -2.274928241482
22    1    0   	   0.290338090563	  -0.521249550499	  -2.180103985338
23    1    0   	   1.834135068553	  -0.775454900286	  -3.057386305868
24    1    0   	   0.848006451531	  -2.148973296717	  -2.639040283352
25    6    0   	  -1.933084259196	  -2.618423987218	   0.843404226387
26    6    0   	  -2.069361312998	  -2.598047082520	   2.343797842315
27    1    0   	  -2.630912765113	  -3.481320809998	   2.673353851451
28    1    0   	  -1.115030350449	  -2.602721073145	   2.873088566565
29    1    0   	  -2.640042518275	  -1.726727928855	   2.680956702094
30    6    0   	  -0.369741338904	   2.458880731116	   0.006770802783
31    6    0   	  -1.430012978804	   2.233147714456	  -0.789847740010
32    6    0   	  -0.258833806393	   3.585391915851	   1.002993497112
33    1    0   	   0.611506003309	   4.216094215560	   0.779492563570
34    1    0   	  -1.140358379967	   4.228384086844	   1.018636547508
35    1    0   	  -0.110166904346	   3.196889930201	   2.019584598911
36    6    0   	  -3.224312707055	  -2.697414730730	   0.053227944850
37    1    0   	  -3.664262709140	  -3.695055950745	   0.198149215464
38    1    0   	  -2.995040090457	  -2.608003662485	  -1.014254047606
39    6    0   	  -4.322306669920	  -1.658224577918	   0.428074707701
40    1    0   	  -5.137324552768	  -1.790047835474	  -0.289674551087
41    1    0   	  -4.742753997603	  -1.936217867064	   1.403321497675
42    6    0   	  -2.754187102084	   2.945522731525	  -0.823071934654
43    1    0   	  -2.662565531602	   3.974002609580	  -0.460504705187
44    1    0   	  -3.103694582910	   3.017351601541	  -1.860089546822
45    6    0   	  -3.904462534037	  -0.208145053148	   0.507249029563
46    1    0   	  -1.373422781758	   1.373226729592	  -1.459934497160
47    6    0   	  -4.188803070922	   0.803163521989	  -0.336323246688
48    1    0   	  -3.368666251435	   0.062933447967	   1.417758990479
49    6    0   	  -3.831650598177	   2.231304926514	   0.044857352019
50    1    0   	  -3.495479368642	   2.251235564274	   1.087271882465
51    1    0   	  -4.747144203685	   2.838105117111	  -0.002723769667
52    6    0   	  -4.928064421547	   0.642259083424	  -1.643310405406
53    1    0   	  -5.176335913213	  -0.396339460527	  -1.870646055757
54    1    0   	  -5.862092036540	   1.218484614829	  -1.632983230965
55    1    0   	  -4.335633888316	   1.030194223599	  -2.481522165808
56    6    0   	   4.897482927699	   1.003422560521	   0.537648737666
57    1    0   	   1.221419072797	   1.434560205246	  -1.049785982509
58    6    0   	   5.369626432213	   1.380042013432	   1.920347956975
59    1    0   	   6.310929302520	   1.940891721904	   1.866165083575
60    1    0   	   4.644670075346	   2.039504024075	   2.414140261460
61    1    0   	   5.531213045157	   0.505556577936	   2.555798635227
62    6    0   	   4.678069716674	   2.172040754486	  -0.389615002510
63    1    0   	   4.035574059272	   2.923375401859	   0.084305660059
64    1    0   	   5.633882722015	   2.670504366977	  -0.595134326627
65    1    0   	   4.234398031560	   1.902554803299	  -1.350054472397
66    1    0   	  -0.810404091733	  -2.722832497779	  -0.905513126061
---------------------------------------------------------------------
SCF Done:  E(scf) =  -977.111472098554     A.U.


IRC-IRC-IRC-IRC-IRC-IRC-IRC-IRC-IRC-IRC-IRC-IRC-IRC-IRC-IRC-IRC-IRC-IRC
Pt  25  Step number   1 out of a maximum of  2608
NET REACTION COORDINATE UP TO THIS POINT =    25.00000
IRC-IRC-IRC-IRC-IRC-IRC-IRC-IRC-IRC-IRC-IRC-IRC-IRC-IRC-IRC-IRC-IRC-IRC
                         Input orientation:
---------------------------------------------------------------------
Center     Atomic      Atomic             Coordinates (Angstroms)
Number     Number       Type             X           Y           Z
---------------------------------------------------------------------
1     6    0   	  -0.756588622003	  -2.629938738500	   0.178018422620
2     6    0   	   0.610683851858	  -2.493279018518	   0.747593828905
3     6    0   	   1.917103272168	  -1.368451345204	  -1.010656057421
4     6    0   	   1.361391174624	  -1.065067835899	   0.295003014637
5     6    0   	   0.343684844623	   0.079586473682	   0.419995033761
6     6    0   	   0.807504834374	   1.480203777053	  -0.027625490845
7     1    0   	   0.609763448074	  -2.415903176489	   1.835921522219
8     1    0   	   1.270935080770	  -3.321857522952	   0.475993899791
9     1    0   	   2.185604860280	  -0.977327883783	   1.012585866406
10    1    0   	  -0.556667703075	  -0.187675447082	  -0.133276243600
11    1    0   	   0.031422383754	   0.123212318593	   1.469964569268
12    1    0   	   1.619027124445	   1.833710065386	   0.617589962966
13    6    0   	   4.746352281894	  -0.289998064076	   0.197007642805
14    1    0   	   4.988067746253	  -1.034931359654	   0.956428209810
15    6    0   	   4.394394616856	  -0.856904167756	  -1.142811889501
16    1    0   	   4.134358727889	  -0.087611285154	  -1.873837877123
17    1    0   	   5.256030797303	  -1.397917287228	  -1.553296976621
18    6    0   	   3.254107295172	  -1.976917422675	  -1.108573133313
19    1    0   	   3.463666896386	  -2.613506107791	  -0.242839885781
20    1    0   	   3.345147061781	  -2.565292460875	  -2.025780735714
21    6    0   	   1.168842473310	  -1.159849103062	  -2.271323040719
22    1    0   	   0.292992422687	  -0.521858503448	  -2.177286632333
23    1    0   	   1.837013691787	  -0.778476504981	  -3.053510980861
24    1    0   	   0.848680268097	  -2.150459728841	  -2.635180893448
25    6    0   	  -1.935381344973	  -2.619691234643	   0.841347439477
26    6    0   	  -2.073537422335	  -2.600396248857	   2.341576460264
27    1    0   	  -2.635917608890	  -3.483664263368	   2.669735906912
28    1    0   	  -1.119874420581	  -2.605923855047	   2.872065739335
29    1    0   	  -2.644239344411	  -1.729077208466	   2.678687801965
30    6    0   	  -0.367837656032	   2.457190938262	   0.012352009024
31    6    0   	  -1.426956289033	   2.233523141081	  -0.786381366209
32    6    0   	  -0.257957153037	   3.581720879226	   1.010923581236
33    1    0   	   0.613057511810	   4.212413038321	   0.790047409289
34    1    0   	  -1.139186081187	   4.225124459500	   1.026395279013
35    1    0   	  -0.111116433002	   3.191188684623	   2.027000508754
36    6    0   	  -3.225647256830	  -2.697076968608	   0.049438049921
37    1    0   	  -3.666487149057	  -3.694534351101	   0.192912970169
38    1    0   	  -2.994915159572	  -2.606899123520	  -1.017664268053
39    6    0   	  -4.323408337509	  -1.657442464656	   0.423743631001
40    1    0   	  -5.137493119620	  -1.787964313528	  -0.295301640482
41    1    0   	  -4.745455417067	  -1.936094503701	   1.398112029218
42    6    0   	  -2.750665946820	   2.946736408026	  -0.820356593899
43    1    0   	  -2.658847718615	   3.974716502012	  -0.456413639984
44    1    0   	  -3.098844127246	   3.020065753824	  -1.857712313776
45    6    0   	  -3.904649699576	  -0.207738980399	   0.504974846044
46    1    0   	  -1.369729704131	   1.374823936029	  -1.457985812074
47    6    0   	  -4.187193883938	   0.804670674534	  -0.337880794259
48    1    0   	  -3.369889861249	   0.062020383331	   1.416485200823
49    6    0   	  -3.829650555052	   2.232157971233	   0.045377673533
50    1    0   	  -3.494792002518	   2.250686836031	   1.088240263810
51    1    0   	  -4.744720596929	   2.839562300608	  -0.002658373539
52    6    0   	  -4.924788942744	   0.645681374214	  -1.646041628671
53    1    0   	  -5.173438857892	  -0.392505171427	  -1.874843496072
54    1    0   	  -5.858446828034	   1.222516106315	  -1.636357929729
55    1    0   	  -4.330961554579	   1.034134854583	  -2.483024176320
56    6    0   	   4.895622675002	   1.008681830624	   0.530863429923
57    1    0   	   1.223731655404	   1.432975018484	  -1.043708328676
58    6    0   	   5.366528106695	   1.392132518235	   1.912115946221
59    1    0   	   6.307435835962	   1.953451655322	   1.855963178957
60    1    0   	   4.640727963430	   2.053324624168	   2.402344378505
61    1    0   	   5.528354632213	   0.520743632928	   2.551748693975
62    6    0   	   4.675714782927	   2.172859301378	  -0.401879601934
63    1    0   	   4.031582460312	   2.925386334778	   0.067913044437
64    1    0   	   5.631066093315	   2.671741812837	  -0.608504776885
65    1    0   	   4.233543737349	   1.898486692508	  -1.361630605058
66    1    0   	  -0.810629282617	  -2.723810346683	  -0.906221247571
---------------------------------------------------------------------
SCF Done:  E(scf) =  -977.111465436956     A.U.


IRC-IRC-IRC-IRC-IRC-IRC-IRC-IRC-IRC-IRC-IRC-IRC-IRC-IRC-IRC-IRC-IRC-IRC
Pt  26  Step number   1 out of a maximum of  2608
NET REACTION COORDINATE UP TO THIS POINT =    26.00000
IRC-IRC-IRC-IRC-IRC-IRC-IRC-IRC-IRC-IRC-IRC-IRC-IRC-IRC-IRC-IRC-IRC-IRC
                         Input orientation:
---------------------------------------------------------------------
Center     Atomic      Atomic             Coordinates (Angstroms)
Number     Number       Type             X           Y           Z
---------------------------------------------------------------------
1     6    0   	  -0.758054666449	  -2.631629330436	   0.177410030638
2     6    0   	   0.608577943517	  -2.496444540706	   0.748790662186
3     6    0   	   1.917839064192	  -1.370728670535	  -1.006345805873
4     6    0   	   1.360800777124	  -1.067934807824	   0.298824385345
5     6    0   	   0.343525417333	   0.077076004386	   0.423706866986
6     6    0   	   0.808835528175	   1.477876616830	  -0.021791836716
7     1    0   	   0.606446202455	  -2.420165294368	   1.837193786588
8     1    0   	   1.268701793892	  -3.325088605754	   0.477099412011
9     1    0   	   2.184038276600	  -0.981446983527	   1.017624820881
10    1    0   	  -0.556215588568	  -0.189049896964	  -0.131107549848
11    1    0   	   0.029866513182	   0.119726341856	   1.473299376505
12    1    0   	   1.619912597985	   1.830047429078	   0.624713551219
13    6    0   	   4.745914419372	  -0.286413888378	   0.196098287044
14    1    0   	   4.987822062765	  -1.027626779044	   0.959088441557
15    6    0   	   4.395192423283	  -0.859726852748	  -1.141344851938
16    1    0   	   4.135828741836	  -0.093905807936	  -1.876235574668
17    1    0   	   5.257212144154	  -1.402695155944	  -1.548427382226
18    6    0   	   3.254809011426	  -1.979462167960	  -1.103206015699
19    1    0   	   3.464724641825	  -2.613840958236	  -0.235957191272
20    1    0   	   3.345414687211	  -2.570086796595	  -2.019044141375
21    6    0   	   1.170795372789	  -1.161539549433	  -2.267648154110
22    1    0   	   0.295756326877	  -0.522305309024	  -2.174413902958
23    1    0   	   1.839989026991	  -0.781464295853	  -3.049558721133
24    1    0   	   0.849333143529	  -2.151825081069	  -2.631249378874
25    6    0   	  -1.937699494374	  -2.620969971492	   0.839234059808
26    6    0   	  -2.077783462063	  -2.602810912859	   2.339291293052
27    1    0   	  -2.640975453877	  -3.486099300245	   2.666005068720
28    1    0   	  -1.124807097727	  -2.609182969645	   2.871007900183
29    1    0   	  -2.648542006249	  -1.731519915544	   2.676366270093
30    6    0   	  -0.365918136311	   2.455542854302	   0.018001402600
31    6    0   	  -1.423930772375	   2.233845357269	  -0.782746545873
32    6    0   	  -0.256973366972	   3.578253350484	   1.018720020644
33    1    0   	   0.614721497202	   4.208862293543	   0.800311857720
34    1    0   	  -1.137881584978	   4.222103127411	   1.033963954473
35    1    0   	  -0.111912272448	   3.185858188562	   2.034332940413
36    6    0   	  -3.226972679517	  -2.696746923384	   0.045549671205
37    1    0   	  -3.668682625378	  -3.694034005511	   0.187524970250
38    1    0   	  -2.994748376333	  -2.605757878031	  -1.021159439264
39    6    0   	  -4.324535024290	  -1.656706210830	   0.419318121758
40    1    0   	  -5.137659110679	  -1.785919036249	  -0.301049930331
41    1    0   	  -4.748204347331	  -1.936057657708	   1.392782759345
42    6    0   	  -2.747159135872	   2.947918552089	  -0.817533360609
43    1    0   	  -2.655157182191	   3.975390245220	  -0.452195716989
44    1    0   	  -3.093949743563	   3.022763273611	  -1.855242952385
45    6    0   	  -3.904895834829	  -0.207376287817	   0.502666940353
46    1    0   	  -1.366130911391	   1.376262245484	  -1.455731833094
47    6    0   	  -4.185626314987	   0.806151023832	  -0.339451880707
48    1    0   	  -3.371210245052	   0.061046082696	   1.415200935444
49    6    0   	  -3.827717092180	   2.232975230463	   0.045929893615
50    1    0   	  -3.494233648965	   2.250085276003	   1.089257108693
51    1    0   	  -4.742357252858	   2.840987978919	  -0.002605159072
52    6    0   	  -4.921502965441	   0.649102198605	  -1.648812952057
53    1    0   	  -5.170505453213	  -0.388667871483	  -1.879118717762
54    1    0   	  -5.854798789620	   1.226532396089	  -1.639788681657
55    1    0   	  -4.326256131319	   1.038103932736	  -2.484531940095
56    6    0   	   4.893783909344	   1.013917341290	   0.523986280677
57    1    0   	   1.226137841194	   1.431440142068	  -1.037462661921
58    6    0   	   5.363485240707	   1.404271770808	   1.903723708212
59    1    0   	   6.303976237799	   1.966082158923	   1.845535492324
60    1    0   	   4.636838004049	   2.067172391802	   2.390379360182
61    1    0   	   5.525604145253	   0.536033768480	   2.547556349345
62    6    0   	   4.673297841928	   2.173577762606	  -0.414257786280
63    1    0   	   4.027515262510	   2.927263753597	   0.051397576931
64    1    0   	   5.628153690332	   2.672911951040	  -0.622056759209
65    1    0   	   4.232601347622	   1.894259914182	  -1.373264224441
66    1    0   	  -0.810820565224	  -2.724724742666	  -0.906950582708
---------------------------------------------------------------------
SCF Done:  E(scf) =  -977.111458389971     A.U.


IRC-IRC-IRC-IRC-IRC-IRC-IRC-IRC-IRC-IRC-IRC-IRC-IRC-IRC-IRC-IRC-IRC-IRC
Pt  27  Step number   1 out of a maximum of  2608
NET REACTION COORDINATE UP TO THIS POINT =    27.00000
IRC-IRC-IRC-IRC-IRC-IRC-IRC-IRC-IRC-IRC-IRC-IRC-IRC-IRC-IRC-IRC-IRC-IRC
                         Input orientation:
---------------------------------------------------------------------
Center     Atomic      Atomic             Coordinates (Angstroms)
Number     Number       Type             X           Y           Z
---------------------------------------------------------------------
1     6    0   	  -0.759526018945	  -2.633288436249	   0.176781436184
2     6    0   	   0.606442947906	  -2.499590540237	   0.750016662622
3     6    0   	   1.918592394110	  -1.372962095366	  -1.001945443166
4     6    0   	   1.360200898972	  -1.070779489461	   0.302727697454
5     6    0   	   0.343359695365	   0.074588766521	   0.427506772851
6     6    0   	   0.810173776253	   1.475580802545	  -0.015811960525
7     1    0   	   0.603059347395	  -2.424423423348	   1.838493740427
8     1    0   	   1.266448777693	  -3.328296251431	   0.478245156182
9     1    0   	   2.182444386167	  -0.985572997710	   1.022765114020
10    1    0   	  -0.555750545775	  -0.190390322308	  -0.128878124615
11    1    0   	   0.028274818755	   0.116238561739	   1.476711377235
12    1    0   	   1.620752288156	   1.826408573312	   0.632049143639
13    6    0   	   4.745543699581	  -0.282845902067	   0.195166221260
14    1    0   	   4.987679371833	  -1.020279570113	   0.961736245329
15    6    0   	   4.396035218734	  -0.862625680388	  -1.139832674299
16    1    0   	   4.137380015657	  -0.100329873769	  -1.878618110074
17    1    0   	   5.258416623186	  -1.407589869277	  -1.543464948296
18    6    0   	   3.255506352379	  -1.982014651772	  -1.097732921820
19    1    0   	   3.465757235214	  -2.614160535717	  -0.228955719196
20    1    0   	   3.345642778389	  -2.574921218873	  -2.012177489249
21    6    0   	   1.172807144846	  -1.163124225801	  -2.263895701748
22    1    0   	   0.298631820251	  -0.522575971483	  -2.171477314267
23    1    0   	   1.843062338179	  -0.784408795684	  -3.045520934525
24    1    0   	   0.849961224220	  -2.153056550816	  -2.627239017410
25    6    0   	  -1.940043730277	  -2.622261207818	   0.837059578143
26    6    0   	  -2.082107988711	  -2.605296454386	   2.336937186599
27    1    0   	  -2.646093926254	  -3.488633101606	   2.662152427950
28    1    0   	  -1.129838306093	  -2.612503569540	   2.869912061461
29    1    0   	  -2.652961480885	  -1.734063307635	   2.673987670437
30    6    0   	  -0.363986349117	   2.453940770541	   0.023724266605
31    6    0   	  -1.420945541990	   2.234106826167	  -0.778929111412
32    6    0   	  -0.255876128823	   3.575011706218	   1.026369186225
33    1    0   	   0.616504945277	   4.205459524693	   0.810255335215
34    1    0   	  -1.136436723353	   4.219345008398	   1.041323765656
35    1    0   	  -0.112542213686	   3.180937595162	   2.041575221374
36    6    0   	  -3.228291967876	  -2.696426629016	   0.041555517401
37    1    0   	  -3.670848825512	  -3.693558885795	   0.181973388989
38    1    0   	  -2.994540921111	  -2.604577412120	  -1.024745810758
39    6    0   	  -4.325694018067	  -1.656022840088	   0.414792219470
40    1    0   	  -5.137828161069	  -1.783919797001	  -0.306926766810
41    1    0   	  -4.751008427861	  -1.936118364122	   1.387326047261
42    6    0   	  -2.743674530337	   2.949062825415	  -0.814595366665
43    1    0   	  -2.651503790678	   3.976017182711	  -0.447843222905
44    1    0   	  -3.089012899624	   3.025438001589	  -1.852676472344
45    6    0   	  -3.905213233842	  -0.207063024918	   0.500323437490
46    1    0   	  -1.362641647655	   1.377522319509	  -1.453145348888
47    6    0   	  -4.184109581034	   0.807598212582	  -0.341039437863
48    1    0   	  -3.372645723635	   0.060005089555	   1.413907324899
49    6    0   	  -3.825863482157	   2.233750542875	   0.046513320331
50    1    0   	  -3.493824941640	   2.249425204692	   1.090323683067
51    1    0   	  -4.740067134600	   2.842375732416	  -0.002571363091
52    6    0   	  -4.918207193553	   0.652514217263	  -1.651631521434
53    1    0   	  -5.167534026879	  -0.384835065584	  -1.883479921342
54    1    0   	  -5.851148988365	   1.230525631264	  -1.643288845716
55    1    0   	  -4.321513446348	   1.042094020679	  -2.486048830839
56    6    0   	   4.891989146169	   1.019126880138	   0.517010981761
57    1    0   	   1.228639651386	   1.429959126373	  -1.031034816220
58    6    0   	   5.360525943834	   1.416454483250	   1.895162764955
59    1    0   	   6.300587202234	   1.978763101344	   1.834872462437
60    1    0   	   4.633038012917	   2.081053984753	   2.378233778834
61    1    0   	   5.522976577322	   0.551421771949	   2.543214974755
62    6    0   	   4.670854088239	   2.174194289874	  -0.426757056982
63    1    0   	   4.023408129525	   2.929007619212	   0.034747849682
64    1    0   	   5.625183943316	   2.674008704508	  -0.635792282321
65    1    0   	   4.231612611968	   1.889875940582	  -1.384965261510
66    1    0   	  -0.810979029100	  -2.725569852981	  -0.907703056805
---------------------------------------------------------------------
SCF Done:  E(scf) =  -977.111450942661     A.U.


IRC-IRC-IRC-IRC-IRC-IRC-IRC-IRC-IRC-IRC-IRC-IRC-IRC-IRC-IRC-IRC-IRC-IRC
Pt  28  Step number   1 out of a maximum of  2608
NET REACTION COORDINATE UP TO THIS POINT =    28.00000
IRC-IRC-IRC-IRC-IRC-IRC-IRC-IRC-IRC-IRC-IRC-IRC-IRC-IRC-IRC-IRC-IRC-IRC
                         Input orientation:
---------------------------------------------------------------------
Center     Atomic      Atomic             Coordinates (Angstroms)
Number     Number       Type             X           Y           Z
---------------------------------------------------------------------
1     6    0   	  -0.761017539274	  -2.634923862726	   0.176121695439
2     6    0   	   0.604257503009	  -2.502737630329	   0.751276581953
3     6    0   	   1.919369115898	  -1.375156554128	  -0.997415423081
4     6    0   	   1.359581154332	  -1.073617081143	   0.306746956271
5     6    0   	   0.343178856459	   0.072110319945	   0.431428167810
6     6    0   	   0.811522884791	   1.473305615965	  -0.009625046045
7     1    0   	   0.599570564284	  -2.428712136572	   1.839826599971
8     1    0   	   1.264154940760	  -3.331499391139	   0.479431675701
9     1    0   	   2.180801521179	  -0.989734014040	   1.028053976098
10    1    0   	  -0.555272173417	  -0.191701656127	  -0.126572527030
11    1    0   	   0.026621082086	   0.112721925866	   1.480228550172
12    1    0   	   1.621536783626	   1.822771284811	   0.639678491125
13    6    0   	   4.745246122141	  -0.279271263582	   0.194207939831
14    1    0   	   4.987636653267	  -1.012835095945	   0.964398170322
15    6    0   	   4.396934361898	  -0.865627951567	  -1.138255446124
16    1    0   	   4.139034798687	  -0.106939715250	  -1.880995967175
17    1    0   	   5.259655469739	  -1.412648770636	  -1.538360685971
18    6    0   	   3.256202398457	  -1.984588492658	  -1.092102195640
19    1    0   	   3.466764936623	  -2.614460784644	  -0.221771708162
20    1    0   	   3.345827559690	  -2.579829005243	  -2.005116163655
21    6    0   	   1.174900071787	  -1.164594644131	  -2.260033252655
22    1    0   	   0.301661095993	  -0.522634875595	  -2.168454677771
23    1    0   	   1.846270695536	  -0.787331882799	  -3.041365257560
24    1    0   	   0.850554333370	  -2.154137683765	  -2.623108486343
25    6    0   	  -1.942435631339	  -2.623574834852	   0.834800597802
26    6    0   	  -2.086548305351	  -2.607876958636	   2.334488585489
27    1    0   	  -2.651317235749	  -3.491290173931	   2.658137669295
28    1    0   	  -1.135011374705	  -2.615919178744	   2.868762512908
29    1    0   	  -2.657534904441	  -1.736732224073	   2.671528608758
30    6    0   	  -0.362035166706	   2.452379663866	   0.029569333201
31    6    0   	  -1.417992460065	   2.234300420373	  -0.774882521145
32    6    0   	  -0.254652318375	   3.572003395670	   1.033907469181
33    1    0   	   0.618429125171	   4.202201138843	   0.819911276901
34    1    0   	  -1.134831300104	   4.216867123251	   1.048497823030
35    1    0   	  -0.113003264678	   3.176445348408	   2.048770323875
36    6    0   	  -3.229617972231	  -2.696114830824	   0.037418319207
37    1    0   	  -3.672999872253	  -3.693109076379	   0.176203852496
38    1    0   	  -2.994294349438	  -2.603343469255	  -1.028456438531
39    6    0   	  -4.326901869128	  -1.655395372701	   0.410129695322
40    1    0   	  -5.138009132042	  -1.781961121324	  -0.312977692560
41    1    0   	  -4.753893897924	  -1.936290469124	   1.381697559551
42    6    0   	  -2.740198916691	   2.950169605354	  -0.811511962788
43    1    0   	  -2.647876364897	   3.976593749808	  -0.443315078291
44    1    0   	  -3.084001994261	   3.028100617234	  -1.849987027807
45    6    0   	  -3.905619472348	  -0.206803638081	   0.497928184682
46    1    0   	  -1.359258130719	   1.378588852698	  -1.450171138936
47    6    0   	  -4.182644990432	   0.809014795509	  -0.342655755857
48    1    0   	  -3.374229460321	   0.058884521717	   1.412599031631
49    6    0   	  -3.824094429360	   2.234482165461	   0.047132750127
50    1    0   	  -3.493590287738	   2.248696139663	   1.091450453877
51    1    0   	  -4.737851634220	   2.843727453845	  -0.002564699832
52    6    0   	  -4.914880101240	   0.655931566103	  -1.654522741961
53    1    0   	  -5.164501545358	  -0.380990040834	  -1.887964220716
54    1    0   	  -5.847474171496	   1.234512643796	  -1.646895808529
55    1    0   	  -4.316696602386	   1.046123199304	  -2.487586583534
56    6    0   	   4.890251691038	   1.024342221637	   0.509879774999
57    1    0   	   1.231262560107	   1.428532654187	  -1.024354749521
58    6    0   	   5.357659887063	   1.428766023979	   1.886357445215
59    1    0   	   6.297278296183	   1.991575208540	   1.823875199169
60    1    0   	   4.629336883756	   2.095073587609	   2.365805660824
61    1    0   	   5.520479826057	   0.567020476842	   2.538683074525
62    6    0   	   4.668408150701	   2.174701180107	  -0.439480971460
63    1    0   	   4.019291378137	   2.930635125883	   0.017828520334
64    1    0   	   5.622186979635	   2.675003906310	  -0.649833934058
65    1    0   	   4.230599493811	   1.885292891627	  -1.396824661240
66    1    0   	  -0.811108599836	  -2.726343441922	  -0.908490494615
---------------------------------------------------------------------
SCF Done:  E(scf) =  -977.111443021191     A.U.


IRC-IRC-IRC-IRC-IRC-IRC-IRC-IRC-IRC-IRC-IRC-IRC-IRC-IRC-IRC-IRC-IRC-IRC
Pt  29  Step number   1 out of a maximum of  2608
NET REACTION COORDINATE UP TO THIS POINT =    29.00000
IRC-IRC-IRC-IRC-IRC-IRC-IRC-IRC-IRC-IRC-IRC-IRC-IRC-IRC-IRC-IRC-IRC-IRC
                         Input orientation:
---------------------------------------------------------------------
Center     Atomic      Atomic             Coordinates (Angstroms)
Number     Number       Type             X           Y           Z
---------------------------------------------------------------------
1     6    0   	  -0.762497720924	  -2.636496143581	   0.175441765001
2     6    0   	   0.602071711822	  -2.505810305858	   0.752532886794
3     6    0   	   1.920141747931	  -1.377247716708	  -0.992869509735
4     6    0   	   1.358952550987	  -1.076375376129	   0.310784775079
5     6    0   	   0.342983788062	   0.069703153448	   0.435386072601
6     6    0   	   0.812845837481	   1.471110616066	  -0.003369632063
7     1    0   	   0.596064050310	  -2.432934582063	   1.841153955290
8     1    0   	   1.261873481389	  -3.334618667090	   0.480617043664
9     1    0   	   2.179148299040	  -0.993830995422	   1.033361639342
10    1    0   	  -0.554799033083	  -0.192949253965	  -0.124233176099
11    1    0   	   0.024947443626	   0.109260623734	   1.483778355630
12    1    0   	   1.622239077167	   1.819230451602	   0.647433235913
13    6    0   	   4.745034748116	  -0.275781275045	   0.193252772520
14    1    0   	   4.987687342957	  -1.005484459499	   0.967020116620
15    6    0   	   4.397866526603	  -0.868661492897	  -1.136652195780
16    1    0   	   4.140761751524	  -0.113571749959	  -1.883316308322
17    1    0   	   5.260891225791	  -1.417761281348	  -1.533236724919
18    6    0   	   3.256868491792	  -1.987115992426	  -1.086460124812
19    1    0   	   3.467707954411	  -2.614738069254	  -0.214591973341
20    1    0   	   3.345948796153	  -2.584680035070	  -1.998047538531
21    6    0   	   1.177010635053	  -1.165895387217	  -2.256154693314
22    1    0   	   0.304761274940	  -0.522454444168	  -2.165415344097
23    1    0   	   1.849523277235	  -0.790147523147	  -3.037196332459
24    1    0   	   0.851076368484	  -2.155021375082	  -2.618955823434
25    6    0   	  -1.944820888818	  -2.624879540468	   0.832509988730
26    6    0   	  -2.090995762182	  -2.610487713303	   2.332004254961
27    1    0   	  -2.656521275292	  -3.494000860763	   2.654061606097
28    1    0   	  -1.140197659160	  -2.619347845954	   2.867583934481
29    1    0   	  -2.662144907077	  -1.739456234164	   2.669048149005
30    6    0   	  -0.360117234271	   2.450901768211	   0.035396977839
31    6    0   	  -1.415154464533	   2.234411499295	  -0.770694828321
32    6    0   	  -0.253326705252	   3.569328018336	   1.041131352209
33    1    0   	   0.620451877192	   4.199189795769	   0.829003066884
34    1    0   	  -1.133099070257	   4.214756934850	   1.055284234470
35    1    0   	  -0.113270651566	   3.172538081266	   2.055732320308
36    6    0   	  -3.230925403896	  -2.695822903275	   0.033239696269
37    1    0   	  -3.675086946736	  -3.692701452184	   0.170358855540
38    1    0   	  -2.994025025940	  -2.602088100795	  -1.032201310063
39    6    0   	  -4.328138914397	  -1.654847204163	   0.405449087671
40    1    0   	  -5.138210685052	  -1.780102302602	  -0.319047531410
41    1    0   	  -4.756795211072	  -1.936579914110	   1.376041936090
42    6    0   	  -2.736827068893	   2.951203169193	  -0.808359717510
43    1    0   	  -2.644375460999	   3.977098925757	  -0.438726523283
44    1    0   	  -3.079042066628	   3.030673421688	  -1.847245366400
45    6    0   	  -3.906119076665	  -0.206610248591	   0.495542136216
46    1    0   	  -1.356080284878	   1.379412276883	  -1.446856187306
47    6    0   	  -4.181280979212	   0.810357146132	  -0.344264803839
48    1    0   	  -3.375942606538	   0.057710682347	   1.411313169972
49    6    0   	  -3.822470518974	   2.235146123172	   0.047766233956
50    1    0   	  -3.493561783646	   2.247914913061	   1.092606667858
51    1    0   	  -4.735782678926	   2.845002832304	  -0.002603576904
52    6    0   	  -4.911608992803	   0.659254703918	  -1.657423923164
53    1    0   	  -5.161482866119	  -0.377245114179	  -1.892467713977
54    1    0   	  -5.843873389245	   1.238375546477	  -1.650536055340
55    1    0   	  -4.311926559977	   1.050077782990	  -2.489114316177
56    6    0   	   4.888646975471	   1.029434683204	   0.502772598501
57    1    0   	   1.233945583823	   1.427200410169	  -1.017571023985
58    6    0   	   5.355003705619	   1.440898406461	   1.877532591514
59    1    0   	   6.294205236982	   2.004153996404	   1.812823365541
60    1    0   	   4.625901580671	   2.108924700597	   2.353394720049
61    1    0   	   5.518178384014	   0.582440349404	   2.534096002149
62    6    0   	   4.666071245923	   2.175092434327	  -0.452117038892
63    1    0   	   4.015286168456	   2.932099799392	   0.001034884079
64    1    0   	   5.619285644963	   2.675901618385	  -0.663797704699
65    1    0   	   4.229682480862	   1.880624894211	  -1.408572313199
66    1    0   	  -0.811213173283	  -2.727027415869	  -0.909299072141
---------------------------------------------------------------------
SCF Done:  E(scf) =  -977.111434813634     A.U.


IRC-IRC-IRC-IRC-IRC-IRC-IRC-IRC-IRC-IRC-IRC-IRC-IRC-IRC-IRC-IRC-IRC-IRC
Pt  30  Step number   1 out of a maximum of  2608
NET REACTION COORDINATE UP TO THIS POINT =    30.00000
IRC-IRC-IRC-IRC-IRC-IRC-IRC-IRC-IRC-IRC-IRC-IRC-IRC-IRC-IRC-IRC-IRC-IRC
                         Input orientation:
---------------------------------------------------------------------
Center     Atomic      Atomic             Coordinates (Angstroms)
Number     Number       Type             X           Y           Z
---------------------------------------------------------------------
1     6    0   	  -0.763887757195	  -2.637922715446	   0.174792911150
2     6    0   	   0.600008452866	  -2.508639638510	   0.753722542237
3     6    0   	   1.920862999526	  -1.379125793277	  -0.988570962602
4     6    0   	   1.358351766033	  -1.078906167260	   0.314610736657
5     6    0   	   0.342786664511	   0.067496913937	   0.439153287209
6     6    0   	   0.814066986060	   1.469114461978	   0.002596516042
7     1    0   	   0.592741033977	  -2.436853111073	   1.842409658674
8     1    0   	   1.259729048344	  -3.337486188648	   0.481743645410
9     1    0   	   2.177583890690	  -0.997635801113	   1.038382808155
10    1    0   	  -0.554356460622	  -0.194071252320	  -0.121996026960
11    1    0   	   0.023349100594	   0.106043799469	   1.487156610758
12    1    0   	   1.622814117401	   1.815983682972	   0.654875055428
13    6    0   	   4.744931789840	  -0.272568797393	   0.192324875037
14    1    0   	   4.987851942960	  -0.998680925360	   0.969394849215
15    6    0   	   4.398743761627	  -0.871502257601	  -1.135165898529
16    1    0   	   4.142356539608	  -0.119757519502	  -1.885451717418
17    1    0   	   5.262015520055	  -1.422545687685	  -1.528521029190
18    6    0   	   3.257469539819	  -1.989444620411	  -1.081147174315
19    1    0   	   3.468568428994	  -2.614956236851	  -0.207842721402
20    1    0   	   3.345998943776	  -2.589193594632	  -1.991392781109
21    6    0   	   1.179005101455	  -1.166972337154	  -2.252481624526
22    1    0   	   0.307780768545	  -0.522016930228	  -2.162542693533
23    1    0   	   1.852620440239	  -0.792793526759	  -3.033285015360
24    1    0   	   0.851412964724	  -2.155671870969	  -2.614959830079
25    6    0   	  -1.947069084829	  -2.626096138452	   0.830331823990
26    6    0   	  -2.095201876513	  -2.612963215833	   2.329639919448
27    1    0   	  -2.661425696353	  -3.496585748414	   2.650176615018
28    1    0   	  -1.145106150527	  -2.622585093896	   2.866458094138
29    1    0   	  -2.666524058922	  -1.742054584885	   2.666695441055
30    6    0   	  -0.358345093360	   2.449582192943	   0.040866318956
31    6    0   	  -1.412590977915	   2.234425411819	  -0.766623861132
32    6    0   	  -0.251988672610	   3.567123653572	   1.047629807840
33    1    0   	   0.622447576450	   4.196585227975	   0.837028327870
34    1    0   	  -1.131352880361	   4.213120014054	   1.061292289280
35    1    0   	  -0.113354424275	   3.169416182772	   2.062065389213
36    6    0   	  -3.232147684550	  -2.695563417304	   0.029272504656
37    1    0   	  -3.676999411191	  -3.692355869175	   0.164788057188
38    1    0   	  -2.993758760106	  -2.600879698580	  -1.035753963618
39    6    0   	  -4.329342649304	  -1.654405700603	   0.401032230215
40    1    0   	  -5.138432659477	  -1.778450217826	  -0.324772362143
41    1    0   	  -4.759550924190	  -1.936963059299	   1.370700219010
42    6    0   	  -2.733749120683	   2.952097118216	  -0.805344842076
43    1    0   	  -2.641195281259	   3.977500425696	  -0.434375310625
44    1    0   	  -3.074413820047	   3.032993258209	  -1.844636238214
45    6    0   	  -3.906692375696	  -0.206487846588	   0.493306739934
46    1    0   	  -1.353281005389	   1.379939066136	  -1.443411666245
47    6    0   	  -4.180100022440	   0.811547821081	  -0.345780911285
48    1    0   	  -3.377698327331	   0.056564588166	   1.410128764520
49    6    0   	  -3.821085313564	   2.235707001833	   0.048358964377
50    1    0   	  -3.493741112083	   2.247137582262	   1.093708736263
51    1    0   	  -4.733977844770	   2.846133539748	  -0.002710527719
52    6    0   	  -4.908580227784	   0.662281658331	  -1.660178855010
53    1    0   	  -5.158658097995	  -0.373827811463	  -1.896730636359
54    1    0   	  -5.840546929517	   1.241889854282	  -1.654025026145
55    1    0   	  -4.307466783713	   1.053703968951	  -2.490557250899
56    6    0   	   4.887291403979	   1.034119640438	   0.496110607883
57    1    0   	   1.236541890221	   1.426032883271	  -1.011068185122
58    6    0   	   5.352751786534	   1.452114800616	   1.869231141607
59    1    0   	   6.291556792887	   2.015788451012	   1.802395544687
60    1    0   	   4.622949802169	   2.121718409652	   2.341812570889
61    1    0   	   5.516302530500	   0.596713713085	   2.529703121741
62    6    0   	   4.664007256240	   2.175398761316	  -0.463896411254
63    1    0   	   4.011749113893	   2.933426435582	  -0.014553462867
64    1    0   	   5.616701806211	   2.676627934294	  -0.676901645120
65    1    0   	   4.228838194931	   1.876251762089	  -1.419474802422
66    1    0   	  -0.811296557340	  -2.727601342386	  -0.910069819050
---------------------------------------------------------------------
SCF Done:  E(scf) =  -977.111426837010     A.U.


IRC-IRC-IRC-IRC-IRC-IRC-IRC-IRC-IRC-IRC-IRC-IRC-IRC-IRC-IRC-IRC-IRC-IRC
Pt  31  Step number   1 out of a maximum of  2608
NET REACTION COORDINATE UP TO THIS POINT =    31.00000
IRC-IRC-IRC-IRC-IRC-IRC-IRC-IRC-IRC-IRC-IRC-IRC-IRC-IRC-IRC-IRC-IRC-IRC
                         Input orientation:
---------------------------------------------------------------------
Center     Atomic      Atomic             Coordinates (Angstroms)
Number     Number       Type             X           Y           Z
---------------------------------------------------------------------
1     6    0   	  -0.765992183995	  -2.639963099228	   0.173692301774
2     6    0   	   0.596860330481	  -2.512844236446	   0.755419261025
3     6    0   	   1.921966789377	  -1.381749906530	  -0.981979938515
4     6    0   	   1.357414212443	  -1.082604709897	   0.320472069108
5     6    0   	   0.342444211999	   0.064267739320	   0.444987108358
6     6    0   	   0.815814853720	   1.466202826863	   0.011754963266
7     1    0   	   0.587674864311	  -2.442806258620	   1.844200421163
8     1    0   	   1.256474995744	  -3.341709101381	   0.483270351147
9     1    0   	   2.175139729247	  -1.003347003232	   1.046092581038
10    1    0   	  -0.553736208392	  -0.195683081372	  -0.118428317618
11    1    0   	   0.020932895999	   0.101278834837	   1.492405476054
12    1    0   	   1.623508498367	   1.811237574260	   0.666306358354
13    6    0   	   4.744931045916	  -0.267819646607	   0.190951106389
14    1    0   	   4.988172555190	  -0.988454646428	   0.972955209910
15    6    0   	   4.400169678767	  -0.875838182932	  -1.132774284577
16    1    0   	   4.144955003434	  -0.129193324038	  -1.888466713569
17    1    0   	   5.263766744938	  -1.429821659773	  -1.521194559584
18    6    0   	   3.258370089611	  -1.992816700864	  -1.073022914991
19    1    0   	   3.469781257100	  -2.615189573957	  -0.197594142326
20    1    0   	   3.346010414913	  -2.595843398357	  -1.981232928062
21    6    0   	   1.182093797746	  -1.168254986016	  -2.246841401013
22    1    0   	   0.312281780995	  -0.521226993364	  -2.158022594867
23    1    0   	   1.857367105800	  -0.796058438565	  -3.027100675657
24    1    0   	   0.852291508180	  -2.156273397939	  -2.609173540829
25    6    0   	  -1.950461243040	  -2.627888522745	   0.826921454812
26    6    0   	  -2.101546673813	  -2.616718892524	   2.325933714479
27    1    0   	  -2.668840086509	  -3.500496677495	   2.644134663226
28    1    0   	  -1.152520034430	  -2.627540888822	   2.864614272226
29    1    0   	  -2.673104988941	  -1.745992640976	   2.663041839654
30    6    0   	  -0.355773307185	   2.447699583950	   0.049130933020
31    6    0   	  -1.408975462035	   2.234249944859	  -0.760179067519
32    6    0   	  -0.249809641792	   3.564373944241	   1.056897655712
33    1    0   	   0.625609842019	   4.193074570517	   0.848127925751
34    1    0   	  -1.128509450516	   4.211288723474	   1.069691821112
35    1    0   	  -0.113141394914	   3.165753293719	   2.071235967214
36    6    0   	  -3.233980306208	  -2.695150935036	   0.023179246110
37    1    0   	  -3.679770805211	  -3.691858692925	   0.156184417882
38    1    0   	  -2.993363842258	  -2.598920960462	  -1.041202005641
39    6    0   	  -4.331236394764	  -1.653852925044	   0.394367251996
40    1    0   	  -5.138852562876	  -1.776110490116	  -0.333373518225
41    1    0   	  -4.763713026365	  -1.937741595386	   1.362628965258
42    6    0   	  -2.729319132845	   2.953286340306	  -0.800650610966
43    1    0   	  -2.636651082877	   3.977946938004	  -0.427684452642
44    1    0   	  -3.067515734691	   3.036302890589	  -1.840582486691
45    6    0   	  -3.907782657063	  -0.206391864269	   0.489978647149
46    1    0   	  -1.349478938837	   1.380237094963	  -1.437543827054
47    6    0   	  -4.178532954642	   0.813217648068	  -0.348048992850
48    1    0   	  -3.380678572360	   0.054789902712	   1.408415175670
49    6    0   	  -3.819310770264	   2.236440627421	   0.049263555524
50    1    0   	  -3.494483667007	   2.245903394740	   1.095410819726
51    1    0   	  -4.731560607076	   2.847718713548	  -0.003017070893
52    6    0   	  -4.904089472733	   0.666652696780	  -1.664356190179
53    1    0   	  -5.154394315592	  -0.368879713112	  -1.903174777991
54    1    0   	  -5.835628941640	   1.246954993380	  -1.659403856425
55    1    0   	  -4.300770050204	   1.058975328407	  -2.492701020398
56    6    0   	   4.885547891202	   1.040970161939	   0.486025233696
57    1    0   	   1.240466132391	   1.424357661203	  -1.001049468955
58    6    0   	   5.349724105505	   1.468769473017	   1.856525632702
59    1    0   	   6.288010574550	   2.032899587433	   1.786433941488
60    1    0   	   4.618970890893	   2.140807483757	   2.324115923802
61    1    0   	   5.513727247088	   0.618060775724	   2.522868758415
62    6    0   	   4.661283979134	   2.175555767395	  -0.481628063695
63    1    0   	   4.006763252179	   2.935022963589	  -0.038086492792
64    1    0   	   5.613197067561	   2.677421712182	  -0.696569651140
65    1    0   	   4.228055875563	   1.869375777742	  -1.435830729887
66    1    0   	  -0.811410997557	  -2.728288879039	  -0.911350770456
---------------------------------------------------------------------
SCF Done:  E(scf) =  -977.111414296030     A.U.


IRC-IRC-IRC-IRC-IRC-IRC-IRC-IRC-IRC-IRC-IRC-IRC-IRC-IRC-IRC-IRC-IRC-IRC
Pt  32  Step number   1 out of a maximum of  2608
NET REACTION COORDINATE UP TO THIS POINT =    32.00000
IRC-IRC-IRC-IRC-IRC-IRC-IRC-IRC-IRC-IRC-IRC-IRC-IRC-IRC-IRC-IRC-IRC-IRC
                         Input orientation:
---------------------------------------------------------------------
Center     Atomic      Atomic             Coordinates (Angstroms)
Number     Number       Type             X           Y           Z
---------------------------------------------------------------------
1     6    0   	  -0.767303425535	  -2.641191321492	   0.172960718558
2     6    0   	   0.594903118844	  -2.515414839423	   0.756421504574
3     6    0   	   1.922662126931	  -1.383294593494	  -0.977889750758
4     6    0   	   1.356797706560	  -1.084806296650	   0.324072314372
5     6    0   	   0.342090547615	   0.062262731878	   0.448414804275
6     6    0   	   0.816807167995	   1.464471033390	   0.017825420974
7     1    0   	   0.584547158473	  -2.446462525479	   1.845263220986
8     1    0   	   1.254466744856	  -3.344271587715	   0.484147916363
9     1    0   	   2.173530048323	  -1.006731999500	   1.050898359840
10    1    0   	  -0.553172644218	  -0.196596670447	  -0.116822381839
11    1    0   	   0.018818320957	   0.098060805372	   1.495253780081
12    1    0   	   1.623394083589	   1.808190403503	   0.674287132141
13    6    0   	   4.745109363562	  -0.264994222143	   0.190079370184
14    1    0   	   4.988562393246	  -0.982283501798	   0.975105319951
15    6    0   	   4.401125438822	  -0.878581530119	  -1.131323645999
16    1    0   	   4.146632716237	  -0.135032314670	  -1.890325004339
17    1    0   	   5.264881083386	  -1.434420824995	  -1.516774728078
18    6    0   	   3.258935493601	  -1.994865596997	  -1.067986594447
19    1    0   	   3.470499765794	  -2.615293767196	  -0.191232137617
20    1    0   	   3.345977238028	  -2.599964223039	  -1.974908851913
21    6    0   	   1.184028018563	  -1.168916931694	  -2.243341377900
22    1    0   	   0.314259110295	  -0.521593970725	  -2.154978885497
23    1    0   	   1.860214651738	  -0.796480866667	  -3.022802201006
24    1    0   	   0.854272306396	  -2.156772884857	  -2.606537297358
25    6    0   	  -1.952561948277	  -2.628958506825	   0.824778445609
26    6    0   	  -2.105452045980	  -2.618976505897	   2.323612995378
27    1    0   	  -2.673385728631	  -3.502859150748	   2.640398634944
28    1    0   	  -1.157076111737	  -2.630510120687	   2.863437126006
29    1    0   	  -2.677168175313	  -1.748365426124	   2.660743532983
30    6    0   	  -0.354264816740	   2.446621515172	   0.054323338365
31    6    0   	  -1.406884518120	   2.234018895022	  -0.755975556820
32    6    0   	  -0.248401834249	   3.563137362896	   1.062259642861
33    1    0   	   0.627683353536	   4.191195728395	   0.854348428193
34    1    0   	  -1.126622816297	   4.210709020994	   1.074284463398
35    1    0   	  -0.112953806242	   3.164335211433	   2.076680088913
36    6    0   	  -3.235131616000	  -2.694893109495	   0.019399334781
37    1    0   	  -3.681446199542	  -3.691578421646	   0.150835689875
38    1    0   	  -2.993163473738	  -2.597666845192	  -1.044586377773
39    6    0   	  -4.332477562564	  -1.653581849022	   0.390288297407
40    1    0   	  -5.139200989023	  -1.774777543712	  -0.338623678024
41    1    0   	  -4.766304731699	  -1.938334618546	   1.357692865354
42    6    0   	  -2.726691791721	   2.953930527950	  -0.797714323832
43    1    0   	  -2.633989547769	   3.978156021052	  -0.423572586290
44    1    0   	  -3.063261714407	   3.038183818580	  -1.838081607242
45    6    0   	  -3.908611369591	  -0.206376137957	   0.487963696568
46    1    0   	  -1.347404809105	   1.380076083680	  -1.433404880408
47    6    0   	  -4.177701799981	   0.814171793787	  -0.349456177219
48    1    0   	  -3.382741913033	   0.053694173126	   1.407424828112
49    6    0   	  -3.818409218295	   2.236842100986	   0.049785521716
50    1    0   	  -3.495242511519	   2.245145630366	   1.096456293457
51    1    0   	  -4.730258690113	   2.848634936264	  -0.003368147788
52    6    0   	  -4.901372086559	   0.669203047300	  -1.666981601634
53    1    0   	  -5.151755415050	  -0.365993658692	  -1.907175177858
54    1    0   	  -5.832681179869	   1.249885458809	  -1.662837427351
55    1    0   	  -4.296668064107	   1.062088444291	  -2.494055492997
56    6    0   	   4.884711513243	   1.045089245527	   0.479798763820
57    1    0   	   1.243382007892	   1.423669743997	  -0.994120310167
58    6    0   	   5.348183110212	   1.478885756378	   1.848683841902
59    1    0   	   6.286146727831	   2.043302844332	   1.776548726111
60    1    0   	   4.616871650518	   2.152406087475	   2.313295318876
61    1    0   	   5.512508889779	   0.631023210374	   2.518602891531
62    6    0   	   4.659835791920	   2.175588360432	  -0.492539722925
63    1    0   	   4.004048158222	   2.936023632826	  -0.052476770720
64    1    0   	   5.611302328436	   2.677746334354	  -0.708762580091
65    1    0   	   4.227649528954	   1.865127128816	  -1.445862453590
66    1    0   	  -0.811481086241	  -2.728677643356	  -0.912197198149
---------------------------------------------------------------------
SCF Done:  E(scf) =  -977.111406157477     A.U.


IRC-IRC-IRC-IRC-IRC-IRC-IRC-IRC-IRC-IRC-IRC-IRC-IRC-IRC-IRC-IRC-IRC-IRC
Pt  33  Step number   1 out of a maximum of  2608
NET REACTION COORDINATE UP TO THIS POINT =    33.00000
IRC-IRC-IRC-IRC-IRC-IRC-IRC-IRC-IRC-IRC-IRC-IRC-IRC-IRC-IRC-IRC-IRC-IRC
                         Input orientation:
---------------------------------------------------------------------
Center     Atomic      Atomic             Coordinates (Angstroms)
Number     Number       Type             X           Y           Z
---------------------------------------------------------------------
1     6    0   	  -0.768652410607	  -2.642271758613	   0.172133995521
2     6    0   	   0.592925184577	  -2.517903429043	   0.757283861166
3     6    0   	   1.923433496028	  -1.384661165269	  -0.973827305550
4     6    0   	   1.356237430491	  -1.086976028241	   0.327703659012
5     6    0   	   0.341996417722	   0.060459305344	   0.452370197493
6     6    0   	   0.817830095956	   1.462861562408	   0.023207179515
7     1    0   	   0.581402539361	  -2.450205082916	   1.846183991309
8     1    0   	   1.252390668521	  -3.346748615441	   0.484768548942
9     1    0   	   2.172066606584	  -1.010346360468	   1.055658800995
10    1    0   	  -0.553114945507	  -0.197563010189	  -0.113701556246
11    1    0   	   0.018112578031	   0.095543707608	   1.499177087910
12    1    0   	   1.624258885678	   1.805778296028	   0.680543854233
13    6    0   	   4.745369854580	  -0.262263533624	   0.189274978261
14    1    0   	   4.989008963038	  -0.976205123184	   0.977271028195
15    6    0   	   4.402140215186	  -0.881353060507	  -1.129768201928
16    1    0   	   4.148471667330	  -0.140938697616	  -1.892052920224
17    1    0   	   5.265985644039	  -1.439088135131	  -1.512170133893
18    6    0   	   3.259467714499	  -1.996905203916	  -1.062900734410
19    1    0   	   3.471140075252	  -2.615444045631	  -0.184860855238
20    1    0   	   3.345887098807	  -2.603976841680	  -1.968611553098
21    6    0   	   1.186294392572	  -1.169183135852	  -2.239959635484
22    1    0   	   0.319161575887	  -0.518596598523	  -2.152772861577
23    1    0   	   1.863861727026	  -0.800728347610	  -3.019704859281
24    1    0   	   0.852323952111	  -2.155827161024	  -2.601547509587
25    6    0   	  -1.954684084299	  -2.629959236667	   0.822568688065
26    6    0   	  -2.109320818022	  -2.621213638814	   2.321221562168
27    1    0   	  -2.678008455135	  -3.505110013681	   2.636590522904
28    1    0   	  -1.161580189233	  -2.633613566033	   2.862133387388
29    1    0   	  -2.681039107683	  -1.750638643246	   2.658426076599
30    6    0   	  -0.352816967967	   2.445592469456	   0.059370059416
31    6    0   	  -1.405010029614	   2.233707656131	  -0.751681503370
32    6    0   	  -0.246894800913	   3.561998087531	   1.067440798014
33    1    0   	   0.629687422566	   4.189543776255	   0.860079325033
34    1    0   	  -1.124733537446	   4.210105990080	   1.078964887987
35    1    0   	  -0.112282001403	   3.163060598219	   2.081924922079
36    6    0   	  -3.236324319410	  -2.694605360184	   0.015601581963
37    1    0   	  -3.683068240801	  -3.691307388378	   0.145430679504
38    1    0   	  -2.993056716377	  -2.596302739288	  -1.047985755529
39    6    0   	  -4.333826540158	  -1.653396731351	   0.386296517539
40    1    0   	  -5.139696613828	  -1.773579184704	  -0.343728386423
41    1    0   	  -4.768904776849	  -1.939071474074	   1.352863471175
42    6    0   	  -2.724303550421	   2.954482503171	  -0.794638038283
43    1    0   	  -2.631566350733	   3.978246526752	  -0.419262306316
44    1    0   	  -3.059199643810	   3.040044048112	  -1.835453004674
45    6    0   	  -3.909666746914	  -0.206420393398	   0.486035570916
46    1    0   	  -1.345547487093	   1.379776958133	  -1.429148057645
47    6    0   	  -4.177076948284	   0.815018856456	  -0.350829385672
48    1    0   	  -3.385135728796	   0.052604081126	   1.406550263926
49    6    0   	  -3.817813982580	   2.237152678097	   0.050341186770
50    1    0   	  -3.496425163600	   2.244328241206	   1.097568694866
51    1    0   	  -4.729273037237	   2.849441216924	  -0.003802635171
52    6    0   	  -4.898695901418	   0.671558424457	  -1.669633922083
53    1    0   	  -5.149162182294	  -0.363314232106	  -1.911151780753
54    1    0   	  -5.829736834833	   1.252656363614	  -1.666458708068
55    1    0   	  -4.292491672398	   1.064903340907	  -2.495379075446
56    6    0   	   4.884026354345	   1.049052327898	   0.473664801692
57    1    0   	   1.245177518923	   1.422568077334	  -0.988601374047
58    6    0   	   5.346852504752	   1.488755737293	   1.840874488098
59    1    0   	   6.284582933144	   2.053291893257	   1.766714457967
60    1    0   	   4.615087580881	   2.163826192293	   2.302468785522
61    1    0   	   5.511366884989	   0.643764246513	   2.514337520790
62    6    0   	   4.658525127591	   2.175464343776	  -0.503255417312
63    1    0   	   4.001182038569	   2.936572211650	  -0.066752836398
64    1    0   	   5.609445017912	   2.678200875669	  -0.720502427866
65    1    0   	   4.227716989201	   1.860729997285	  -1.455771478553
66    1    0   	  -0.811654862297	  -2.728874762909	  -0.913132682700
---------------------------------------------------------------------
SCF Done:  E(scf) =  -977.111397919983     A.U.


IRC-IRC-IRC-IRC-IRC-IRC-IRC-IRC-IRC-IRC-IRC-IRC-IRC-IRC-IRC-IRC-IRC-IRC
Pt  34  Step number   1 out of a maximum of  2608
NET REACTION COORDINATE UP TO THIS POINT =    34.00000
IRC-IRC-IRC-IRC-IRC-IRC-IRC-IRC-IRC-IRC-IRC-IRC-IRC-IRC-IRC-IRC-IRC-IRC
                         Input orientation:
---------------------------------------------------------------------
Center     Atomic      Atomic             Coordinates (Angstroms)
Number     Number       Type             X           Y           Z
---------------------------------------------------------------------
1     6    0   	  -0.770014123959	  -2.643427992525	   0.171267335904
2     6    0   	   0.590941975531	  -2.520406363500	   0.758074439321
3     6    0   	   1.924288242411	  -1.385902131596	  -0.969789119212
4     6    0   	   1.355560495218	  -1.089042411604	   0.331187674670
5     6    0   	   0.341433515997	   0.058455212165	   0.455485887577
6     6    0   	   0.818693624291	   1.461305351327	   0.029909834926
7     1    0   	   0.578304679563	  -2.453846723497	   1.847034463630
8     1    0   	   1.250376382512	  -3.349200765631	   0.485351440742
9     1    0   	   2.170282310921	  -1.013545302936	   1.060464692236
10    1    0   	  -0.552295057912	  -0.198360762572	  -0.113068817375
11    1    0   	   0.015059407472	   0.091916726846	   1.501416788368
12    1    0   	   1.623411668027	   1.802694866090	   0.689867250531
13    6    0   	   4.745913766747	  -0.259646684128	   0.188272269413
14    1    0   	   4.989736435575	  -0.970354887483	   0.979136437413
15    6    0   	   4.403249050399	  -0.884083428467	  -1.128425578988
16    1    0   	   4.150147471866	  -0.146655495330	  -1.893802371615
17    1    0   	   5.267157787698	  -1.443578584256	  -1.508132658507
18    6    0   	   3.260127921098	  -1.998829829020	  -1.057856768289
19    1    0   	   3.471898397893	  -2.615401340463	  -0.178484969814
20    1    0   	   3.345853158832	  -2.608012390240	  -1.962250317128
21    6    0   	   1.188419881658	  -1.169414423285	  -2.236506653337
22    1    0   	   0.321367173363	  -0.517735352917	  -2.149893785634
23    1    0   	   1.867341726297	  -0.801647027760	  -3.016119284976
24    1    0   	   0.853790895596	  -2.156681724611	  -2.598260545996
25    6    0   	  -1.956784626716	  -2.630872237603	   0.820382021105
26    6    0   	  -2.113079189653	  -2.623159497808	   2.318865377307
27    1    0   	  -2.682254843964	  -3.507174345934	   2.633001083198
28    1    0   	  -1.165944202575	  -2.636083727227	   2.860823465480
29    1    0   	  -2.685001858848	  -1.752723806218	   2.656060657927
30    6    0   	  -0.351496856286	   2.444647406509	   0.064758909948
31    6    0   	  -1.403197500508	   2.233172183789	  -0.747046787927
32    6    0   	  -0.245494883324	   3.561595784767	   1.072199407320
33    1    0   	   0.631535325603	   4.188537459438	   0.864935635845
34    1    0   	  -1.122960861370	   4.210178748657	   1.082839149858
35    1    0   	  -0.111634069808	   3.163184132184	   2.086955029270
36    6    0   	  -3.237553595081	  -2.694307181031	   0.011928732164
37    1    0   	  -3.684679088352	  -3.691034743023	   0.140270961812
38    1    0   	  -2.993068572684	  -2.595002819526	  -1.051282872283
39    6    0   	  -4.335223906204	  -1.653215242437	   0.382467152680
40    1    0   	  -5.140302774577	  -1.772469392644	  -0.348579000134
41    1    0   	  -4.771444475324	  -1.939776247987	   1.348253922234
42    6    0   	  -2.721902771096	   2.954864458715	  -0.791724824401
43    1    0   	  -2.629236229298	   3.978272058879	  -0.415384269629
44    1    0   	  -3.054915639638	   3.041425438544	  -1.833071325161
45    6    0   	  -3.910831536188	  -0.206440048066	   0.484157876537
46    1    0   	  -1.343924415129	   1.378900220836	  -1.424061889420
47    6    0   	  -4.176534811208	   0.815794509413	  -0.352275236761
48    1    0   	  -3.387673197517	   0.051635937485	   1.405721503401
49    6    0   	  -3.817347650251	   2.237449755151	   0.050675677295
50    1    0   	  -3.497885800713	   2.243650854159	   1.098495134412
51    1    0   	  -4.728393796360	   2.850233119244	  -0.004676835749
52    6    0   	  -4.896096713670	   0.673658970054	  -1.672352316457
53    1    0   	  -5.146361533359	  -0.360960868739	  -1.915167680362
54    1    0   	  -5.827068358272	   1.254886056523	  -1.670084358518
55    1    0   	  -4.288563692660	   1.067653512842	  -2.496809178543
56    6    0   	   4.883648100060	   1.052856988993	   0.467479989887
57    1    0   	   1.248781446600	   1.422541144357	  -0.980642785951
58    6    0   	   5.345763018426	   1.498230743961	   1.833117137012
59    1    0   	   6.283128704098	   2.063117605042	   1.757127529997
60    1    0   	   4.613369945047	   2.174492908108	   2.291965523191
61    1    0   	   5.510685823928	   0.655922021510	   2.509861870737
62    6    0   	   4.657603383079	   2.175337156768	  -0.513864173267
63    1    0   	   3.999175639698	   2.937366284792	  -0.080566318031
64    1    0   	   5.608125836289	   2.678268818457	  -0.732362310832
65    1    0   	   4.227695858442	   1.856605030381	  -1.465462228646
66    1    0   	  -0.811847450457	  -2.729321802733	  -0.914095451165
---------------------------------------------------------------------
SCF Done:  E(scf) =  -977.111389149314     A.U.


IRC-IRC-IRC-IRC-IRC-IRC-IRC-IRC-IRC-IRC-IRC-IRC-IRC-IRC-IRC-IRC-IRC-IRC
Pt  35  Step number   1 out of a maximum of  2608
NET REACTION COORDINATE UP TO THIS POINT =    35.00000
IRC-IRC-IRC-IRC-IRC-IRC-IRC-IRC-IRC-IRC-IRC-IRC-IRC-IRC-IRC-IRC-IRC-IRC
                         Input orientation:
---------------------------------------------------------------------
Center     Atomic      Atomic             Coordinates (Angstroms)
Number     Number       Type             X           Y           Z
---------------------------------------------------------------------
1     6    0   	  -0.771475300794	  -2.644267292306	   0.170147836557
2     6    0   	   0.588959998865	  -2.522736180903	   0.758387974252
3     6    0   	   1.925427219264	  -1.386952677894	  -0.966032288375
4     6    0   	   1.354919739605	  -1.091021976039	   0.334388947241
5     6    0   	   0.341168515034	   0.056775092186	   0.458871119778
6     6    0   	   0.819502730647	   1.460039503469	   0.035430839697
7     1    0   	   0.575320349209	  -2.457681275053	   1.847417471434
8     1    0   	   1.248201647959	  -3.351507713930	   0.485148844607
9     1    0   	   2.168601717290	  -1.016932128471	   1.064955464638
10    1    0   	  -0.552130312478	  -0.199155810288	  -0.110945378865
11    1    0   	   0.013730692134	   0.089215633180	   1.504630680482
12    1    0   	   1.623622546067	   1.800506205417	   0.696817219925
13    6    0   	   4.746457992874	  -0.257351257951	   0.187689902367
14    1    0   	   4.990237241701	  -0.964754371624	   0.981543440984
15    6    0   	   4.404680142489	  -0.887205515000	  -1.126697510982
16    1    0   	   4.152631168495	  -0.152838349696	  -1.895381178342
17    1    0   	   5.268639936310	  -1.448783937742	  -1.503256427421
18    6    0   	   3.260820922201	  -2.000992505742	  -1.052647739527
19    1    0   	   3.472406741891	  -2.615659946762	  -0.171935154921
20    1    0   	   3.345938623681	  -2.612168725169	  -1.955810414783
21    6    0   	   1.191631487087	  -1.168758693654	  -2.233648451806
22    1    0   	   0.330898594742	  -0.510111491703	  -2.149387559093
23    1    0   	   1.872057466209	  -0.810591489322	  -3.014567709864
24    1    0   	   0.847212117668	  -2.152639078213	  -2.590604169265
25    6    0   	  -1.958889539037	  -2.631680007517	   0.818115945253
26    6    0   	  -2.116575278242	  -2.625319101667	   2.316445674234
27    1    0   	  -2.686227867290	  -3.509501928345	   2.629261283340
28    1    0   	  -1.169934717464	  -2.638916418658	   2.859264068752
29    1    0   	  -2.688613118661	  -1.755052748349	   2.653880173224
30    6    0   	  -0.350398370980	   2.443850896346	   0.069720692922
31    6    0   	  -1.401835515466	   2.232689653312	  -0.742518871987
32    6    0   	  -0.244084075031	   3.561263639164	   1.076637349799
33    1    0   	   0.633371119173	   4.187604557050	   0.869258579055
34    1    0   	  -1.121207625559	   4.210378042725	   1.086706281491
35    1    0   	  -0.110696351429	   3.163249139808	   2.091642800832
36    6    0   	  -3.238908951027	  -2.693880054421	   0.008379375365
37    1    0   	  -3.686276279202	  -3.690710863245	   0.135106344084
38    1    0   	  -2.993411144533	  -2.593329212474	  -1.054482324669
39    6    0   	  -4.336796234259	  -1.653108083713	   0.379147299940
40    1    0   	  -5.141251175182	  -1.771474810713	  -0.352733155911
41    1    0   	  -4.773876695362	  -1.940694256002	   1.344234391105
42    6    0   	  -2.720021221150	   2.955244793950	  -0.788604604399
43    1    0   	  -2.627382461696	   3.978234304469	  -0.411142688193
44    1    0   	  -3.051273289451	   3.042985051567	  -1.830437040837
45    6    0   	  -3.912342165296	  -0.206486342043	   0.482767669903
46    1    0   	  -1.342769688829	   1.378082379166	  -1.419151991730
47    6    0   	  -4.176231683301	   0.816415454256	  -0.353420793440
48    1    0   	  -3.390778676298	   0.050790848849	   1.405465664991
49    6    0   	  -3.817315782408	   2.237651906925	   0.051237316537
50    1    0   	  -3.499790023282	   2.242958710745	   1.099658478845
51    1    0   	  -4.728029818440	   2.850825431026	  -0.005355961791
52    6    0   	  -4.893337827492	   0.675373009046	  -1.674960178439
53    1    0   	  -5.143593550744	  -0.359002675006	  -1.918825273080
54    1    0   	  -5.824066857542	   1.257008545773	  -1.674131149697
55    1    0   	  -4.284062193354	   1.069570686270	  -2.498044815764
56    6    0   	   4.883314275469	   1.056354906580	   0.461608660820
57    1    0   	   1.250970679632	   1.422320263559	  -0.974708910792
58    6    0   	   5.344523159862	   1.507554009626	   1.825673901796
59    1    0   	   6.281566048873	   2.072727410689	   1.747860142541
60    1    0   	   4.611482245435	   2.185172108500	   2.281525088846
61    1    0   	   5.509673896606	   0.668039209134	   2.505870225618
62    6    0   	   4.656931134502	   2.174784970664	  -0.524322635337
63    1    0   	   3.997093799470	   2.937651464244	  -0.094584412695
64    1    0   	   5.607052205112	   2.678061480648	  -0.743753231733
65    1    0   	   4.228356457862	   1.851898173537	  -1.475149284247
66    1    0   	  -0.812406264697	  -2.729298412195	  -0.915313845170
---------------------------------------------------------------------
SCF Done:  E(scf) =  -977.111379511092     A.U.


IRC-IRC-IRC-IRC-IRC-IRC-IRC-IRC-IRC-IRC-IRC-IRC-IRC-IRC-IRC-IRC-IRC-IRC
Pt  36  Step number   1 out of a maximum of  2608
NET REACTION COORDINATE UP TO THIS POINT =    36.00000
IRC-IRC-IRC-IRC-IRC-IRC-IRC-IRC-IRC-IRC-IRC-IRC-IRC-IRC-IRC-IRC-IRC-IRC
                         Input orientation:
---------------------------------------------------------------------
Center     Atomic      Atomic             Coordinates (Angstroms)
Number     Number       Type             X           Y           Z
---------------------------------------------------------------------
1     6    0   	  -0.772793849511	  -2.644996371707	   0.168893967370
2     6    0   	   0.587113044376	  -2.525016270589	   0.758504543606
3     6    0   	   1.926218632698	  -1.387659341594	  -0.962418342664
4     6    0   	   1.354122226983	  -1.092550326337	   0.337334784180
5     6    0   	   0.340137189710	   0.054965401182	   0.461532221696
6     6    0   	   0.819938406857	   1.458901184130	   0.042266597880
7     1    0   	   0.572692210792	  -2.461375445211	   1.847593712012
8     1    0   	   1.246324950896	  -3.353565733894	   0.484605656993
9     1    0   	   2.166565289449	  -1.019595949144	   1.069338954181
10    1    0   	  -0.551615913229	  -0.199798660002	  -0.111132177582
11    1    0   	   0.009814189581	   0.085317473953	   1.506404353098
12    1    0   	   1.622127839678	   1.797783233860	   0.706794752949
13    6    0   	   4.747317728713	  -0.255422871969	   0.187169085624
14    1    0   	   4.991004257089	  -0.959534027095	   0.983919334373
15    6    0   	   4.406427929404	  -0.890578414381	  -1.124872271461
16    1    0   	   4.155977555933	  -0.159241976042	  -1.896882772490
17    1    0   	   5.270344594864	  -1.454453382632	  -1.497970729539
18    6    0   	   3.261398183554	  -2.002663817832	  -1.047889828805
19    1    0   	   3.472414702722	  -2.615734075030	  -0.165932588383
20    1    0   	   3.345807386375	  -2.615875470595	  -1.949765744514
21    6    0   	   1.194200951930	  -1.168389724143	  -2.230927303229
22    1    0   	   0.328061350671	  -0.514121336687	  -2.145993359137
23    1    0   	   1.876924794848	  -0.801969622265	  -3.009025483885
24    1    0   	   0.857693602083	  -2.155694491041	  -2.594003671414
25    6    0   	  -1.960729296492	  -2.632378646926	   0.815941982317
26    6    0   	  -2.119678482330	  -2.627149442139	   2.314146715406
27    1    0   	  -2.690340864142	  -3.511105301262	   2.625752107384
28    1    0   	  -1.173535701139	  -2.641956338673	   2.857796765436
29    1    0   	  -2.691295647816	  -1.756681852723	   2.651775634613
30    6    0   	  -0.349571609080	   2.443305694828	   0.074969812769
31    6    0   	  -1.400650859427	   2.232091481559	  -0.737732781284
32    6    0   	  -0.243010491670	   3.561910973155	   1.080527562805
33    1    0   	   0.635484217773	   4.186854353517	   0.873379535075
34    1    0   	  -1.119291584300	   4.212155105415	   1.088674969468
35    1    0   	  -0.111329239280	   3.165087192010	   2.096200291779
36    6    0   	  -3.240109192609	  -2.693364846216	   0.005106730626
37    1    0   	  -3.687661972393	  -3.690315859537	   0.130239913239
38    1    0   	  -2.993719637030	  -2.591553846966	  -1.057425951685
39    6    0   	  -4.338250712641	  -1.652983338479	   0.376212741201
40    1    0   	  -5.142141535070	  -1.770587414838	  -0.356418021760
41    1    0   	  -4.776071532651	  -1.941588828174	   1.340647932939
42    6    0   	  -2.718256654796	   2.955482971532	  -0.785780907908
43    1    0   	  -2.625802348523	   3.978177015409	  -0.407504743664
44    1    0   	  -3.047522677484	   3.044009907672	  -1.828172234329
45    6    0   	  -3.913911318827	  -0.206447934994	   0.481602148711
46    1    0   	  -1.341866285962	   1.376765582520	  -1.413438028750
47    6    0   	  -4.175966653062	   0.816942463328	  -0.354553824093
48    1    0   	  -3.394140295024	   0.050238500852	   1.405462306669
49    6    0   	  -3.817487091275	   2.237887662988	   0.051501371218
50    1    0   	  -3.502101487052	   2.242613748569	   1.100552083170
51    1    0   	  -4.727865809284	   2.851382557013	  -0.006677307038
52    6    0   	  -4.890394709078	   0.676673351194	  -1.677609602905
53    1    0   	  -5.140733730505	  -0.357496074801	  -1.922266766610
54    1    0   	  -5.820769069659	   1.258858750716	  -1.678587295275
55    1    0   	  -4.279168735147	   1.070724963635	  -2.499312324384
56    6    0   	   4.883327066392	   1.059361806167	   0.455889164812
57    1    0   	   1.254634375479	   1.422903017716	  -0.966592107262
58    6    0   	   5.343662588471	   1.516295271293	   1.818290773359
59    1    0   	   6.280599038583	   2.081379445867	   1.738631585470
60    1    0   	   4.610209123823	   2.195572709608	   2.270959024019
61    1    0   	   5.508679855203	   0.679661241971	   2.502004650886
62    6    0   	   4.656615961307	   2.173729577675	  -0.534509952257
63    1    0   	   3.995074408512	   2.937165961613	  -0.108482059725
64    1    0   	   5.606239128052	   2.677601140207	  -0.754679013705
65    1    0   	   4.229726078621	   1.846668608123	  -1.484626505857
66    1    0   	  -0.812703617333	  -2.728728134739	  -0.916708074486
---------------------------------------------------------------------
SCF Done:  E(scf) =  -977.111369146519     A.U.


IRC-IRC-IRC-IRC-IRC-IRC-IRC-IRC-IRC-IRC-IRC-IRC-IRC-IRC-IRC-IRC-IRC-IRC
Pt  37  Step number   1 out of a maximum of  2608
NET REACTION COORDINATE UP TO THIS POINT =    37.00000
IRC-IRC-IRC-IRC-IRC-IRC-IRC-IRC-IRC-IRC-IRC-IRC-IRC-IRC-IRC-IRC-IRC-IRC
                         Input orientation:
---------------------------------------------------------------------
Center     Atomic      Atomic             Coordinates (Angstroms)
Number     Number       Type             X           Y           Z
---------------------------------------------------------------------
1     6    0   	  -0.774033608617	  -2.646022172556	   0.168069255284
2     6    0   	   0.585456815401	  -2.526997780166	   0.758745319807
3     6    0   	   1.927636137236	  -1.388204730683	  -0.959460674080
4     6    0   	   1.353172524590	  -1.094324613150	   0.339656806781
5     6    0   	   0.339184912677	   0.053159990029	   0.463173586214
6     6    0   	   0.820531869081	   1.458046953819	   0.049010530710
7     1    0   	   0.570101195516	  -2.464596985007	   1.847894210907
8     1    0   	   1.244574271217	  -3.355508505079	   0.484473061925
9     1    0   	   2.164502732932	  -1.022063972221	   1.073003156138
10    1    0   	  -0.550686879986	  -0.200348555856	  -0.112931943193
11    1    0   	   0.005386608828	   0.081297268718	   1.506970724637
12    1    0   	   1.620171114024	   1.795129399607	   0.717497487488
13    6    0   	   4.748000081044	  -0.253621921124	   0.186581155835
14    1    0   	   4.991603334554	  -0.954760194975	   0.986015144761
15    6    0   	   4.407875717969	  -0.893624258272	  -1.123387250311
16    1    0   	   4.158404088023	  -0.165145074789	  -1.898449457775
17    1    0   	   5.271736460167	  -1.459553767893	  -1.493584103130
18    6    0   	   3.262031631579	  -2.004822122317	  -1.042942007561
19    1    0   	   3.472662733205	  -2.615753328752	  -0.159462793797
20    1    0   	   3.345916462241	  -2.620154499269	  -1.943485917999
21    6    0   	   1.197996673310	  -1.166563643142	  -2.228848811314
22    1    0   	   0.345544101587	  -0.496459372466	  -2.148357841563
23    1    0   	   1.882902299458	  -0.822818350241	  -3.012172724900
24    1    0   	   0.839290257018	  -2.148127891161	  -2.578978149891
25    6    0   	  -1.962561921243	  -2.633065916747	   0.814058733697
26    6    0   	  -2.122827749202	  -2.628912920334	   2.312103039247
27    1    0   	  -2.694647406315	  -3.512575802732	   2.622432702305
28    1    0   	  -1.177180141149	  -2.645101755178	   2.856569030368
29    1    0   	  -2.693932887552	  -1.758178635848	   2.649918407046
30    6    0   	  -0.348865346325	   2.442766876779	   0.079935069748
31    6    0   	  -1.399597726568	   2.231351082903	  -0.733173627012
32    6    0   	  -0.242176449376	   3.562491436438	   1.084244278989
33    1    0   	   0.637190921815	   4.186269964815	   0.877244381926
34    1    0   	  -1.117770353283	   4.213691502258	   1.090814716205
35    1    0   	  -0.111862656209	   3.166667822251	   2.100502704263
36    6    0   	  -3.241232095054	  -2.692893311001	   0.002010307246
37    1    0   	  -3.688929200782	  -3.690000242142	   0.125436218103
38    1    0   	  -2.993896841462	  -2.589705629243	  -1.060176435559
39    6    0   	  -4.339707801658	  -1.652982615299	   0.373425964960
40    1    0   	  -5.143002974003	  -1.769865412093	  -0.359984015417
41    1    0   	  -4.778280759054	  -1.942648417478	   1.337191349926
42    6    0   	  -2.716680464817	   2.955582888148	  -0.783075766617
43    1    0   	  -2.624344855752	   3.977978869680	  -0.403995058822
44    1    0   	  -3.044077649571	   3.044920249677	  -1.826014727223
45    6    0   	  -3.915557121945	  -0.206513332947	   0.480577948789
46    1    0   	  -1.341214845722	   1.375145904764	  -1.407780052881
47    6    0   	  -4.175868684242	   0.817335543357	  -0.355565508477
48    1    0   	  -3.397541807856	   0.049621334192	   1.405585239166
49    6    0   	  -3.817799968842	   2.238005805935	   0.051805922799
50    1    0   	  -3.504461499173	   2.242192482408	   1.101493980642
51    1    0   	  -4.727881820029	   2.851819398870	  -0.007910587959
52    6    0   	  -4.887686357562	   0.677802098965	  -1.680122845184
53    1    0   	  -5.138053282803	  -0.356168653053	  -1.925602061649
54    1    0   	  -5.817742233759	   1.260497014392	  -1.682881880178
55    1    0   	  -4.274537420064	   1.071752475428	  -2.500463999171
56    6    0   	   4.883319110313	   1.062227524703	   0.450562110508
57    1    0   	   1.259368190097	   1.424800058747	  -0.958093062630
58    6    0   	   5.343034007026	   1.524474660714	   1.811439742201
59    1    0   	   6.279960800198	   2.089335709805	   1.729906921965
60    1    0   	   4.609371700979	   2.205559863652	   2.261090931968
61    1    0   	   5.507817765910	   0.690532772530	   2.498530088803
62    6    0   	   4.656343526744	   2.172890243789	  -0.544019374840
63    1    0   	   3.993343591685	   2.937034518704	  -0.121455961902
64    1    0   	   5.605575494505	   2.677160343913	  -0.764971492680
65    1    0   	   4.230904334308	   1.841942692550	  -1.493503063206
66    1    0   	  -0.813356643060	  -2.729572835083	  -0.917568146823
---------------------------------------------------------------------
SCF Done:  E(scf) =  -977.111362781407     A.U.


IRC-IRC-IRC-IRC-IRC-IRC-IRC-IRC-IRC-IRC-IRC-IRC-IRC-IRC-IRC-IRC-IRC-IRC
Pt  38  Step number   1 out of a maximum of  2608
NET REACTION COORDINATE UP TO THIS POINT =    38.00000
IRC-IRC-IRC-IRC-IRC-IRC-IRC-IRC-IRC-IRC-IRC-IRC-IRC-IRC-IRC-IRC-IRC-IRC
                         Input orientation:
---------------------------------------------------------------------
Center     Atomic      Atomic             Coordinates (Angstroms)
Number     Number       Type             X           Y           Z
---------------------------------------------------------------------
1     6    0   	  -0.775489488478	  -2.646778876449	   0.166540566312
2     6    0   	   0.583489586251	  -2.529609503399	   0.758575168784
3     6    0   	   1.928538473860	  -1.388754331750	  -0.955511473983
4     6    0   	   1.352434632481	  -1.096045990376	   0.343004128651
5     6    0   	   0.338385833244	   0.051279821381	   0.466768106631
6     6    0   	   0.820947896534	   1.456814703412	   0.056251833159
7     1    0   	   0.567382017813	  -2.469149216254	   1.847808153053
8     1    0   	   1.242475396159	  -3.357845202816	   0.483241707715
9     1    0   	   2.162499786778	  -1.025386953094	   1.077858553149
10    1    0   	  -0.550372312704	  -0.201100386051	  -0.111544447764
11    1    0   	   0.002482381477	   0.077484143031	   1.509961655524
12    1    0   	   1.618840463587	   1.792613006586	   0.727537166404
13    6    0   	   4.749126704697	  -0.251665673512	   0.185962425929
14    1    0   	   4.992694246068	  -0.949379230427	   0.988371420369
15    6    0   	   4.409744033249	  -0.897149351367	  -1.121519477991
16    1    0   	   4.161937040246	  -0.171825059927	  -1.900013549207
17    1    0   	   5.273469799069	  -1.465546046746	  -1.488164425402
18    6    0   	   3.262599836680	  -2.006521740306	  -1.037915983774
19    1    0   	   3.472712568124	  -2.615865577240	  -0.153226171892
20    1    0   	   3.345588630242	  -2.623867850700	  -1.937206235442
21    6    0   	   1.200854553763	  -1.165417920345	  -2.225769408597
22    1    0   	   0.345781174565	  -0.497281468308	  -2.145058880113
23    1    0   	   1.887817467056	  -0.816979654163	  -3.006806167520
24    1    0   	   0.846131623535	  -2.148380391101	  -2.580171453118
25    6    0   	  -1.964529180843	  -2.633634265065	   0.811632755180
26    6    0   	  -2.125995853502	  -2.630550520957	   2.309547641797
27    1    0   	  -2.699058041346	  -3.513811316841	   2.618707834687
28    1    0   	  -1.180832849760	  -2.648187786241	   2.854796675730
29    1    0   	  -2.696422653230	  -1.759443788257	   2.647545902439
30    6    0   	  -0.348142483104	   2.442055216010	   0.085539167225
31    6    0   	  -1.398541954886	   2.230395288983	  -0.727952597283
32    6    0   	  -0.241120596103	   3.563222410188	   1.088209961746
33    1    0   	   0.639175721947	   4.185651495163	   0.881105242362
34    1    0   	  -1.115943379411	   4.215463840251	   1.092912739437
35    1    0   	  -0.112236009626	   3.168824573980	   2.105199905505
36    6    0   	  -3.242589495935	  -2.692184099676	  -0.001465605189
37    1    0   	  -3.690366688516	  -3.689471681344	   0.120219942402
38    1    0   	  -2.994424193268	  -2.587544418695	  -1.063314747589
39    6    0   	  -4.341404923872	  -1.652840413892	   0.370493523123
40    1    0   	  -5.144216478174	  -1.769029204612	  -0.363567314885
41    1    0   	  -4.780555895292	  -1.943625067755	   1.333643866624
42    6    0   	  -2.714959463280	   2.955611816008	  -0.780199673615
43    1    0   	  -2.622785703283	   3.977711403603	  -0.400311718101
44    1    0   	  -3.040018802057	   3.045751967284	  -1.823811360081
45    6    0   	  -3.917547645854	  -0.206407844901	   0.479393554191
46    1    0   	  -1.340478955873	   1.373252712451	  -1.401365675504
47    6    0   	  -4.175911537589	   0.817807531251	  -0.356894479912
48    1    0   	  -3.401567813257	   0.049285632788	   1.405649976766
49    6    0   	  -3.818413791739	   2.238244921193	   0.051771767780
50    1    0   	  -3.507676189730	   2.242023026128	   1.102225288114
51    1    0   	  -4.728099293542	   2.852422427556	  -0.010040180204
52    6    0   	  -4.884739260424	   0.678828158897	  -1.683104836173
53    1    0   	  -5.134839774505	  -0.355010860845	  -1.929419308595
54    1    0   	  -5.814597443627	   1.261813285575	  -1.687873501624
55    1    0   	  -4.269583053972	   1.072795124613	  -2.501934762466
56    6    0   	   4.883698158198	   1.065283555775	   0.444499467030
57    1    0   	   1.262716849835	   1.425097349858	  -0.949692052675
58    6    0   	   5.342770455105	   1.533501439755	   1.803528959861
59    1    0   	   6.279596212464	   2.098218830001	   1.719874775136
60    1    0   	   4.608800831223	   2.216358972483	   2.249948990461
61    1    0   	   5.507508059089	   0.702599443236	   2.494264300349
62    6    0   	   4.656295234735	   2.171702989270	  -0.554694646080
63    1    0   	   3.991448755629	   2.936353573360	  -0.136002636921
64    1    0   	   5.604962614059	   2.676685526391	  -0.776404819430
65    1    0   	   4.232661343388	   1.836398751583	  -1.503437036758
66    1    0   	  -0.813870757047	  -2.729087909441	  -0.919228110905
---------------------------------------------------------------------
SCF Done:  E(scf) =  -977.111354027684     A.U.


IRC-IRC-IRC-IRC-IRC-IRC-IRC-IRC-IRC-IRC-IRC-IRC-IRC-IRC-IRC-IRC-IRC-IRC
Pt  39  Step number   1 out of a maximum of  2608
NET REACTION COORDINATE UP TO THIS POINT =    39.00000
IRC-IRC-IRC-IRC-IRC-IRC-IRC-IRC-IRC-IRC-IRC-IRC-IRC-IRC-IRC-IRC-IRC-IRC
                         Input orientation:
---------------------------------------------------------------------
Center     Atomic      Atomic             Coordinates (Angstroms)
Number     Number       Type             X           Y           Z
---------------------------------------------------------------------
1     6    0   	  -0.777212561959	  -2.648048498060	   0.165060074642
2     6    0   	   0.581258272764	  -2.532562937465	   0.758394073053
3     6    0   	   1.930294691142	  -1.389133754736	  -0.951333400262
4     6    0   	   1.351210528687	  -1.098267363781	   0.346305549512
5     6    0   	   0.336882851022	   0.048726002952	   0.469580265371
6     6    0   	   0.821371200282	   1.455631113020	   0.066249705712
7     1    0   	   0.564226995133	  -2.474173631102	   1.847709084255
8     1    0   	   1.240126767502	  -3.360526495126	   0.482006807502
9     1    0   	   2.159649890218	  -1.028880275340	   1.083073319980
10    1    0   	  -0.549304839094	  -0.201899636512	  -0.113388544828
11    1    0   	  -0.003677453572	   0.071550217297	   1.511320147646
12    1    0   	   1.615667076249	   1.789077274800	   0.742979861284
13    6    0   	   4.750780039803	  -0.249543294487	   0.184868398198
14    1    0   	   4.994477048232	  -0.943371113739	   0.990591948393
15    6    0   	   4.411990617001	  -0.901266595808	  -1.119698088456
16    1    0   	   4.165523390922	  -0.179605936506	  -1.901996524835
17    1    0   	   5.275463936061	  -1.472367338160	  -1.482698830923
18    6    0   	   3.263510022785	  -2.008901440998	  -1.031588991887
19    1    0   	   3.473055149052	  -2.615768483693	  -0.145123726870
20    1    0   	   3.345477449269	  -2.628933496424	  -1.929199422468
21    6    0   	   1.205739255276	  -1.162795963998	  -2.222808174430
22    1    0   	   0.360254088577	  -0.482529672278	  -2.145608327549
23    1    0   	   1.895950604260	  -0.830557835762	  -3.007158440082
24    1    0   	   0.834864260087	  -2.142374008407	  -2.568815515316
25    6    0   	  -1.966876399875	  -2.634213671710	   0.809063169343
26    6    0   	  -2.129701899866	  -2.631964373231	   2.306815443813
27    1    0   	  -2.704181675582	  -3.514689353697	   2.614868255383
28    1    0   	  -1.185065119112	  -2.651140710074	   2.852918385162
29    1    0   	  -2.699335861146	  -1.760346743118	   2.644838632930
30    6    0   	  -0.347572916022	   2.441308721315	   0.092761451703
31    6    0   	  -1.397397873060	   2.229011694196	  -0.721324457477
32    6    0   	  -0.240374135347	   3.564709704381	   1.092916079072
33    1    0   	   0.641049245103	   4.185451188038	   0.885513013926
34    1    0   	  -1.114297327054	   4.218170350624	   1.094936815759
35    1    0   	  -0.113323050361	   3.172474032910	   2.110973372888
36    6    0   	  -3.244222460301	  -2.691426903303	  -0.005253260147
37    1    0   	  -3.692070707077	  -3.688912652218	   0.114597818668
38    1    0   	  -2.995100460577	  -2.585273237933	  -1.066726790630
39    6    0   	  -4.343470180398	  -1.652717367116	   0.367172899894
40    1    0   	  -5.145711485173	  -1.768235705626	  -0.367626406445
41    1    0   	  -4.783274456444	  -1.944699786345	   1.329647779115
42    6    0   	  -2.712995490356	   2.955423249803	  -0.776986998494
43    1    0   	  -2.621162674958	   3.977291398835	  -0.396439428389
44    1    0   	  -3.034990463551	   3.046179469933	  -1.821520599596
45    6    0   	  -3.920036844511	  -0.206291880093	   0.477945238717
46    1    0   	  -1.339784762476	   1.370388273502	  -1.392842937802
47    6    0   	  -4.176165102393	   0.818248929151	  -0.358622561824
48    1    0   	  -3.406453704791	   0.049015925853	   1.405635978731
49    6    0   	  -3.819417435648	   2.238477996441	   0.051421478053
50    1    0   	  -3.511959511729	   2.241938208729	   1.102843128973
51    1    0   	  -4.728616190363	   2.853089827566	  -0.013146207778
52    6    0   	  -4.881484929882	   0.679731395239	  -1.686752438595
53    1    0   	  -5.131115082932	  -0.354010363468	  -1.933971391272
54    1    0   	  -5.811217037553	   1.262894186181	  -1.693862262532
55    1    0   	  -4.264076470498	   1.073778084547	  -2.503851897149
56    6    0   	   4.884368105736	   1.068665366829	   0.437263523098
57    1    0   	   1.268866319871	   1.427524113475	  -0.937291557362
58    6    0   	   5.342785243018	   1.543577629049	   1.794200480571
59    1    0   	   6.279379126169	   2.108321166474	   1.708159896049
60    1    0   	   4.608363435326	   2.228196133216	   2.237167024839
61    1    0   	   5.507698656337	   0.716036135936	   2.488921072825
62    6    0   	   4.656243441482	   2.170309085873	  -0.567048183758
63    1    0   	   3.989402520260	   2.935500324865	  -0.152505294404
64    1    0   	   5.604235498037	   2.676116175263	  -0.789737933081
65    1    0   	   4.234458675471	   1.830127753361	  -1.514883537904
66    1    0   	  -0.814810309765	  -2.729878660880	  -0.920774397178
---------------------------------------------------------------------
SCF Done:  E(scf) =  -977.111341559767     A.U.


IRC-IRC-IRC-IRC-IRC-IRC-IRC-IRC-IRC-IRC-IRC-IRC-IRC-IRC-IRC-IRC-IRC-IRC
Pt  40  Step number   1 out of a maximum of  2608
NET REACTION COORDINATE UP TO THIS POINT =    40.00000
IRC-IRC-IRC-IRC-IRC-IRC-IRC-IRC-IRC-IRC-IRC-IRC-IRC-IRC-IRC-IRC-IRC-IRC
                         Input orientation:
---------------------------------------------------------------------
Center     Atomic      Atomic             Coordinates (Angstroms)
Number     Number       Type             X           Y           Z
---------------------------------------------------------------------
1     6    0   	  -0.778632816434	  -2.649048557803	   0.163626075837
2     6    0   	   0.579451775837	  -2.535153857386	   0.757944981309
3     6    0   	   1.931735449707	  -1.389246290634	  -0.947838870162
4     6    0   	   1.350223079292	  -1.100032580034	   0.349063945973
5     6    0   	   0.335545655676	   0.046551349444	   0.472131942261
6     6    0   	   0.821551864306	   1.454668526063	   0.075032651511
7     1    0   	   0.561810107142	  -2.478746792690	   1.847336732027
8     1    0   	   1.238204805651	  -3.362790124105	   0.480370371968
9     1    0   	   2.157250112057	  -1.031868351201	   1.087488658543
10    1    0   	  -0.548463463053	  -0.202573154126	  -0.114752954583
11    1    0   	  -0.008913136826	   0.066331082786	   1.512645215400
12    1    0   	   1.612653471784	   1.786154829039	   0.756501153019
13    6    0   	   4.752418209310	  -0.248007057342	   0.183969928726
14    1    0   	   4.996274949461	  -0.938556754153	   0.992444332769
15    6    0   	   4.414123931704	  -0.904956793559	  -1.118122342839
16    1    0   	   4.169098605802	  -0.186373995629	  -1.903673433950
17    1    0   	   5.277310977039	  -1.478522530917	  -1.477865364028
18    6    0   	   3.264249351307	  -2.010765393280	  -1.026439542540
19    1    0   	   3.473160142974	  -2.615755662275	  -0.138582429294
20    1    0   	   3.345236384845	  -2.632979240196	  -1.922691517045
21    6    0   	   1.209869090349	  -1.160228230903	  -2.220351077055
22    1    0   	   0.369631590486	  -0.472849586970	  -2.145189176921
23    1    0   	   1.902893753682	  -0.836669438874	  -3.006028701751
24    1    0   	   0.829966823895	  -2.138126804163	  -2.562603272271
25    6    0   	  -1.968731884501	  -2.634534325103	   0.806883825998
26    6    0   	  -2.132514051156	  -2.632783638085	   2.304522159304
27    1    0   	  -2.708380348556	  -3.514863435189	   2.611820035630
28    1    0   	  -1.188269685512	  -2.653423018991	   2.851240425098
29    1    0   	  -2.701216644390	  -1.760546008940	   2.642517605899
30    6    0   	  -0.347297983504	   2.440690837761	   0.098995084238
31    6    0   	  -1.396605714596	   2.227692206784	  -0.715591521590
32    6    0   	  -0.239969231705	   3.566234063022	   1.096732087204
33    1    0   	   0.642526717057	   4.185371132538	   0.889083188973
34    1    0   	  -1.113036632785	   4.220836122683	   1.096135219020
35    1    0   	  -0.114717154758	   3.176104439972	   2.115819112993
36    6    0   	  -3.245587564931	  -2.690660495762	  -0.008275917446
37    1    0   	  -3.693422363158	  -3.688336344472	   0.110092678909
38    1    0   	  -2.995806888351	  -2.583235161861	  -1.069465543300
39    6    0   	  -4.345222114127	  -1.652557730383	   0.364668766056
40    1    0   	  -5.147089953957	  -1.767633953465	  -0.370618626107
41    1    0   	  -4.785400155344	  -1.945524443051	   1.326659108899
42    6    0   	  -2.711466209831	   2.955143267684	  -0.774457312690
43    1    0   	  -2.619960501404	   3.976870255544	  -0.393490054707
44    1    0   	  -3.030674949715	   3.046265600254	  -1.819834217112
45    6    0   	  -3.922283281355	  -0.206083313194	   0.476838330336
46    1    0   	  -1.339358923663	   1.367669020569	  -1.385301107778
47    6    0   	  -4.176551490514	   0.818574457341	  -0.360144357566
48    1    0   	  -3.410830059486	   0.049092367846	   1.405735634160
49    6    0   	  -3.820563752423	   2.238722902573	   0.050836433501
50    1    0   	  -3.516120466719	   2.242148540942	   1.103132808362
51    1    0   	  -4.729330894835	   2.853677352863	  -0.016401378162
52    6    0   	  -4.878794984813	   0.680165162939	  -1.689914398729
53    1    0   	  -5.127833051580	  -0.353566825082	  -1.937790010795
54    1    0   	  -5.808508024809	   1.263324749281	  -1.699143203225
55    1    0   	  -4.259495120130	   1.074282525675	  -2.505550738256
56    6    0   	   4.885114942127	   1.071230213515	   0.431220861302
57    1    0   	   1.274051436855	   1.429630361959	  -0.926391158783
58    6    0   	   5.343016715378	   1.551779257102	   1.786345564278
59    1    0   	   6.279405806595	   2.116544449606	   1.698238285703
60    1    0   	   4.608230441352	   2.237875249587	   2.226404184664
61    1    0   	   5.508115203565	   0.727102343625	   2.484411156452
62    6    0   	   4.656257260505	   2.168839346338	  -0.577341860727
63    1    0   	   3.987491772381	   2.934271525084	  -0.166351208337
64    1    0   	   5.603574504057	   2.675590037209	  -0.800727483441
65    1    0   	   4.236250479721	   1.824510219984	  -1.524466592203
66    1    0   	  -0.815626473690	  -2.730365534052	  -0.922273725261
---------------------------------------------------------------------
SCF Done:  E(scf) =  -977.111330166310     A.U.


IRC-IRC-IRC-IRC-IRC-IRC-IRC-IRC-IRC-IRC-IRC-IRC-IRC-IRC-IRC-IRC-IRC-IRC
Pt  41  Step number   1 out of a maximum of  2608
NET REACTION COORDINATE UP TO THIS POINT =    41.00000
IRC-IRC-IRC-IRC-IRC-IRC-IRC-IRC-IRC-IRC-IRC-IRC-IRC-IRC-IRC-IRC-IRC-IRC
                         Input orientation:
---------------------------------------------------------------------
Center     Atomic      Atomic             Coordinates (Angstroms)
Number     Number       Type             X           Y           Z
---------------------------------------------------------------------
1     6    0   	  -0.780010680808	  -2.650181305813	   0.162262036367
2     6    0   	   0.577744975405	  -2.537739920469	   0.757390789480
3     6    0   	   1.933481310300	  -1.389159108447	  -0.944535680924
4     6    0   	   1.349149019823	  -1.101845422179	   0.351562695645
5     6    0   	   0.333980366030	   0.044209335185	   0.474174921611
6     6    0   	   0.821607698372	   1.453806053870	   0.084673343469
7     1    0   	   0.559543085337	  -2.483316976427	   1.846851543487
8     1    0   	   1.236388071365	  -3.365031421586	   0.478593828758
9     1    0   	   2.154687175569	  -1.034715146841	   1.091715277554
10    1    0   	  -0.547266771810	  -0.203201747887	  -0.117504124749
11    1    0   	  -0.015305070074	   0.060371017708	   1.513093890280
12    1    0   	   1.608697148361	   1.782958725391	   0.771873816191
13    6    0   	   4.754320844530	  -0.246670738004	   0.182881859879
14    1    0   	   4.998459126099	  -0.933993141261	   0.993997083962
15    6    0   	   4.416402311254	  -0.908744274373	  -1.116718842278
16    1    0   	   4.172688165422	  -0.193230641767	  -1.905439937786
17    1    0   	   5.279225458239	  -1.484763119706	  -1.473340714685
18    6    0   	   3.265098139704	  -2.012729099116	  -1.021218238733
19    1    0   	   3.473348364746	  -2.615690327343	  -0.131884801769
20    1    0   	   3.345032439869	  -2.637205404474	  -1.916059782938
21    6    0   	   1.214629992020	  -1.156920317797	  -2.218123453575
22    1    0   	   0.384117997401	  -0.457532147166	  -2.146129926542
23    1    0   	   1.910640813986	  -0.849272064449	  -3.007094858759
24    1    0   	   0.818547723276	  -2.131166611763	  -2.552239692431
25    6    0   	  -1.970517718029	  -2.634705528991	   0.804831679558
26    6    0   	  -2.135149926849	  -2.633143851756	   2.302361985499
27    1    0   	  -2.712402725097	  -3.514498992807	   2.609122065407
28    1    0   	  -1.191257718628	  -2.655165150409	   2.849623166628
29    1    0   	  -2.702870628154	  -1.760207204759	   2.640202746003
30    6    0   	  -0.347249523333	   2.440076950310	   0.105598446002
31    6    0   	  -1.395920435909	   2.226188720658	  -0.709591882360
32    6    0   	  -0.239914972930	   3.568057913432	   1.100576052694
33    1    0   	   0.643704749132	   4.185497451803	   0.892645146312
34    1    0   	  -1.112096351648	   4.223813045172	   1.097020798501
35    1    0   	  -0.116627853029	   3.180330532066	   2.120808478311
36    6    0   	  -3.246932973924	  -2.689854861516	  -0.011084641542
37    1    0   	  -3.694706892164	  -3.687723947868	   0.105946233770
38    1    0   	  -2.996563017135	  -2.581272485201	  -1.072015700463
39    6    0   	  -4.346987729336	  -1.652373641179	   0.362323749932
40    1    0   	  -5.148519291854	  -1.767144921376	  -0.373388454416
41    1    0   	  -4.787459593955	  -1.946244267929	   1.323889163742
42    6    0   	  -2.709992571486	   2.954716655759	  -0.772107059455
43    1    0   	  -2.618894085399	   3.976376933403	  -0.390904341574
44    1    0   	  -3.026167794483	   3.045999088650	  -1.818409883061
45    6    0   	  -3.924641984326	  -0.205808453435	   0.475705901439
46    1    0   	  -1.339053284926	   1.364573625120	  -1.377220126624
47    6    0   	  -4.177107948057	   0.818848828887	  -0.361811733140
48    1    0   	  -3.415339315612	   0.049380020319	   1.405772506673
49    6    0   	  -3.821952326140	   2.238985745659	   0.049935645226
50    1    0   	  -3.520739971089	   2.242548106350	   1.103154484993
51    1    0   	  -4.730248149712	   2.854287952780	  -0.020256860774
52    6    0   	  -4.876270749166	   0.680342608020	  -1.693191262000
53    1    0   	  -5.124536268269	  -0.353439854171	  -1.941650242780
54    1    0   	  -5.806067149303	   1.263326732798	  -1.704541726773
55    1    0   	  -4.255179874945	   1.074601520902	  -2.507396224925
56    6    0   	   4.885996485315	   1.073558319354	   0.425125888917
57    1    0   	   1.280194773743	   1.432651650595	  -0.914054840153
58    6    0   	   5.343415241419	   1.559602151394	   1.778446570153
59    1    0   	   6.279517801438	   2.124516633655	   1.688307221342
60    1    0   	   4.608194780719	   2.246981274985	   2.215756795126
61    1    0   	   5.508853033127	   0.737716513394	   2.479704407747
62    6    0   	   4.656203060165	   2.167215192469	  -0.587505038051
63    1    0   	   3.985460758717	   2.932725281756	  -0.179891765373
64    1    0   	   5.602765987218	   2.675057008176	  -0.811575463641
65    1    0   	   4.237961147250	   1.818831352849	  -1.533918195731
66    1    0   	  -0.816563433571	  -2.731414057728	  -0.923664834921
---------------------------------------------------------------------
SCF Done:  E(scf) =  -977.111317571735     A.U.


IRC-IRC-IRC-IRC-IRC-IRC-IRC-IRC-IRC-IRC-IRC-IRC-IRC-IRC-IRC-IRC-IRC-IRC
Pt  42  Step number   1 out of a maximum of  2608
NET REACTION COORDINATE UP TO THIS POINT =    42.00000
IRC-IRC-IRC-IRC-IRC-IRC-IRC-IRC-IRC-IRC-IRC-IRC-IRC-IRC-IRC-IRC-IRC-IRC
                         Input orientation:
---------------------------------------------------------------------
Center     Atomic      Atomic             Coordinates (Angstroms)
Number     Number       Type             X           Y           Z
---------------------------------------------------------------------
1     6    0   	  -0.781294869694	  -2.651205430808	   0.160943132507
2     6    0   	   0.576263922628	  -2.540145594164	   0.756577795030
3     6    0   	   1.935268156810	  -1.388631037936	  -0.941663381949
4     6    0   	   1.348167522375	  -1.103456618917	   0.353724643920
5     6    0   	   0.332524397199	   0.042050585174	   0.476377602772
6     6    0   	   0.821604145231	   1.453115447565	   0.093700472459
7     1    0   	   0.557742969347	  -2.487808060543	   1.846105400749
8     1    0   	   1.234767878365	  -3.367031401580	   0.476339194894
9     1    0   	   2.152356149600	  -1.037435902184	   1.095454954211
10    1    0   	  -0.546550131781	  -0.203810065639	  -0.119417559759
11    1    0   	  -0.020756742070	   0.054801125248	   1.514158127048
12    1    0   	   1.605679759545	   1.780343697587	   0.785748769553
13    6    0   	   4.756374400580	  -0.245681518371	   0.181781180141
14    1    0   	   5.000887390914	  -0.930058466339	   0.995243600675
15    6    0   	   4.418758124532	  -0.912407584293	  -1.115519088484
16    1    0   	   4.176408728171	  -0.199700649708	  -1.907156024247
17    1    0   	   5.281154745024	  -1.490815263117	  -1.469193074905
18    6    0   	   3.265915021256	  -2.014420814190	  -1.016534556625
19    1    0   	   3.473384902655	  -2.615623702260	  -0.125883033968
20    1    0   	   3.344726426440	  -2.640938782491	  -1.910125984585
21    6    0   	   1.219383632954	  -1.153455178269	  -2.216309818223
22    1    0   	   0.397310083637	  -0.442415828898	  -2.147938699429
23    1    0   	   1.918624451525	  -0.862524767122	  -3.008878773293
24    1    0   	   0.807817249785	  -2.125745332606	  -2.541781812431
25    6    0   	  -1.972093024163	  -2.634727406190	   0.803043688111
26    6    0   	  -2.137319100510	  -2.633133563516	   2.300495784419
27    1    0   	  -2.715835830695	  -3.513776425114	   2.606970450036
28    1    0   	  -1.193668235212	  -2.656362450200	   2.848131816667
29    1    0   	  -2.704084210987	  -1.759478800562	   2.638134856018
30    6    0   	  -0.347389815882	   2.439519665692	   0.112081062196
31    6    0   	  -1.395386227945	   2.224625810599	  -0.703722793357
32    6    0   	  -0.240122030164	   3.569966888895	   1.104261217911
33    1    0   	   0.644287212772	   4.186119466152	   0.895599505191
34    1    0   	  -1.111798752636	   4.226490895513	   1.098138416781
35    1    0   	  -0.118151707515	   3.184656248464	   2.125631198996
36    6    0   	  -3.248211460130	  -2.689068187628	  -0.013398694640
37    1    0   	  -3.695913385372	  -3.687098023938	   0.102612878122
38    1    0   	  -2.997426163821	  -2.579593294812	  -1.074138920104
39    6    0   	  -4.348630006891	  -1.652116302788	   0.360390833286
40    1    0   	  -5.149931833647	  -1.766758549159	  -0.375602368392
41    1    0   	  -4.789255225995	  -1.946672314902	   1.321664295827
42    6    0   	  -2.708658360349	   2.954155654870	  -0.770139527794
43    1    0   	  -2.618016630292	   3.975845316805	  -0.388940584319
44    1    0   	  -3.021677949114	   3.045344835320	  -1.817406515557
45    6    0   	  -3.926897514491	  -0.205425297662	   0.474611377887
46    1    0   	  -1.338752391883	   1.361408907929	  -1.369254954558
47    6    0   	  -4.177816522108	   0.819077958312	  -0.363548875030
48    1    0   	  -3.419574571557	   0.049963471320	   1.405696439253
49    6    0   	  -3.823530398273	   2.239296644324	   0.048672793073
50    1    0   	  -3.525640430336	   2.243229268793	   1.102816429276
51    1    0   	  -4.731328793190	   2.854925067389	  -0.024677878256
52    6    0   	  -4.874184733796	   0.680225200892	  -1.696352082068
53    1    0   	  -5.121541454921	  -0.353679607519	  -1.945245209423
54    1    0   	  -5.804177766670	   1.262853178492	  -1.709637314270
55    1    0   	  -4.251574976059	   1.074687387060	  -2.509300604580
56    6    0   	   4.886903809670	   1.075427277268	   0.419539127417
57    1    0   	   1.285179260037	   1.435425823469	  -0.903160424436
58    6    0   	   5.343836133637	   1.566433797280	   1.771220917864
59    1    0   	   6.279609886159	   2.131595522279	   1.679264252168
60    1    0   	   4.608144582199	   2.254843166497	   2.206104763030
61    1    0   	   5.509686903678	   0.747069184625	   2.475315026976
62    6    0   	   4.656011850411	   2.165505742925	  -0.596678962403
63    1    0   	   3.983259592542	   2.930848780166	  -0.192063299213
64    1    0   	   5.601754593366	   2.674615235227	  -0.821288923199
65    1    0   	   4.239502965406	   1.813422229843	  -1.542473313258
66    1    0   	  -0.817621921911	  -2.732395706093	  -0.925002171590
---------------------------------------------------------------------
SCF Done:  E(scf) =  -977.111302752368     A.U.


IRC-IRC-IRC-IRC-IRC-IRC-IRC-IRC-IRC-IRC-IRC-IRC-IRC-IRC-IRC-IRC-IRC-IRC
Pt  43  Step number   1 out of a maximum of  2608
NET REACTION COORDINATE UP TO THIS POINT =    43.00000
IRC-IRC-IRC-IRC-IRC-IRC-IRC-IRC-IRC-IRC-IRC-IRC-IRC-IRC-IRC-IRC-IRC-IRC
                         Input orientation:
---------------------------------------------------------------------
Center     Atomic      Atomic             Coordinates (Angstroms)
Number     Number       Type             X           Y           Z
---------------------------------------------------------------------
1     6    0   	  -0.782401798129	  -2.652530082145	   0.160064519716
2     6    0   	   0.574990927562	  -2.542509621994	   0.756058516904
3     6    0   	   1.937166523585	  -1.388447408351	  -0.939394362540
4     6    0   	   1.347049796334	  -1.105321279135	   0.355240276843
5     6    0   	   0.330707279781	   0.039502201753	   0.476897090862
6     6    0   	   0.821359604166	   1.452346925923	   0.104051687180
7     1    0   	   0.556111570267	  -2.491709680255	   1.845644830786
8     1    0   	   1.233376451161	  -3.369139479279	   0.474804696048
9     1    0   	   2.149886220322	  -1.039725103574	   1.098538759249
10    1    0   	  -0.544476187479	  -0.204281921548	  -0.124990618538
11    1    0   	  -0.028894902807	   0.047801529591	   1.512215620493
12    1    0   	   1.599362415859	   1.776524317877	   0.803640112553
13    6    0   	   4.758245428588	  -0.244935834214	   0.180491488280
14    1    0   	   5.003181823334	  -0.926806792021	   0.995964375338
15    6    0   	   4.420799612401	  -0.915653863659	  -1.114829128099
16    1    0   	   4.179261967044	  -0.205370153532	  -1.908917840901
17    1    0   	   5.282787298463	  -1.496049591900	  -1.466267152769
18    6    0   	   3.266761377292	  -2.016344695129	  -1.012296671556
19    1    0   	   3.473729154430	  -2.615654644415	  -0.120324619933
20    1    0   	   3.344630439717	  -2.644773479117	  -1.904707473678
21    6    0   	   1.224692921818	  -1.148605304885	  -2.215067648409
22    1    0   	   0.419325743093	  -0.419637380828	  -2.150088083444
23    1    0   	   1.926634487716	  -0.880488730541	  -3.012663575532
24    1    0   	   0.787627787120	  -2.112201968443	  -2.528461880373
25    6    0   	  -1.973460780013	  -2.634652368696	   0.801763509346
26    6    0   	  -2.139122332615	  -2.632556059267	   2.299146583446
27    1    0   	  -2.718130605654	  -3.512781671140	   2.605691951319
28    1    0   	  -1.195701166227	  -2.656037961263	   2.847106972344
29    1    0   	  -2.705556532285	  -1.758576725423	   2.636315876270
30    6    0   	  -0.347692545391	   2.438885627785	   0.118203569680
31    6    0   	  -1.394760612519	   2.222900913492	  -0.698524084375
32    6    0   	  -0.240805791799	   3.572109623518	   1.107276445764
33    1    0   	   0.644704076776	   4.186511157974	   0.898571003826
34    1    0   	  -1.111455877759	   4.229698678833	   1.097659934465
35    1    0   	  -0.121174931559	   3.189587914414	   2.129822102338
36    6    0   	  -3.249347649208	  -2.688384891259	  -0.015078037117
37    1    0   	  -3.696999553681	  -3.686527155454	   0.100235290540
38    1    0   	  -2.998228212745	  -2.578332690954	  -1.075677548609
39    6    0   	  -4.350076817679	  -1.651824759952	   0.358884044296
40    1    0   	  -5.151162171392	  -1.766454644324	  -0.377354645757
41    1    0   	  -4.790856506654	  -1.946851101627	   1.319930554909
42    6    0   	  -2.707301421977	   2.953448655809	  -0.768944932412
43    1    0   	  -2.617106614331	   3.975288441773	  -0.388088237100
44    1    0   	  -3.017436764936	   3.044185684480	  -1.817162962861
45    6    0   	  -3.928872970770	  -0.205011950479	   0.473641895751
46    1    0   	  -1.338430471774	   1.357935835692	  -1.361716618862
47    6    0   	  -4.178477029759	   0.819258781904	  -0.365197044958
48    1    0   	  -3.423165995087	   0.050656625459	   1.405535981925
49    6    0   	  -3.824843435157	   2.239594554009	   0.047216135592
50    1    0   	  -3.529810963787	   2.243993300031	   1.102194942088
51    1    0   	  -4.732191842841	   2.855573377463	  -0.028975719087
52    6    0   	  -4.872508860783	   0.679950612083	  -1.699190251167
53    1    0   	  -5.119129421841	  -0.354072311055	  -1.948305684289
54    1    0   	  -5.802653006244	   1.262300617088	  -1.714177029500
55    1    0   	  -4.248629212103	   1.074451903707	  -2.511150403874
56    6    0   	   4.887687190041	   1.076995764115	   0.414414338399
57    1    0   	   1.293248070956	   1.439816475656	  -0.888469934304
58    6    0   	   5.344206361205	   1.572264230778	   1.764727741636
59    1    0   	   6.279481964977	   2.138001653389	   1.671228248132
60    1    0   	   4.607881734580	   2.261218965790	   2.197682817573
61    1    0   	   5.510792238469	   0.754996793086	   2.471127350060
62    6    0   	   4.655798638576	   2.164023968932	  -0.604905739057
63    1    0   	   3.981939876670	   2.929586008732	  -0.202579102760
64    1    0   	   5.600963527118	   2.673744292613	  -0.830541665765
65    1    0   	   4.240107663174	   1.808877457910	  -1.549930843393
66    1    0   	  -0.818606201957	  -2.734338912114	  -0.925847869568
---------------------------------------------------------------------
SCF Done:  E(scf) =  -977.111290300341     A.U.


IRC-IRC-IRC-IRC-IRC-IRC-IRC-IRC-IRC-IRC-IRC-IRC-IRC-IRC-IRC-IRC-IRC-IRC
Pt  44  Step number   1 out of a maximum of  2608
NET REACTION COORDINATE UP TO THIS POINT =    44.00000
IRC-IRC-IRC-IRC-IRC-IRC-IRC-IRC-IRC-IRC-IRC-IRC-IRC-IRC-IRC-IRC-IRC-IRC
                         Input orientation:
---------------------------------------------------------------------
Center     Atomic      Atomic             Coordinates (Angstroms)
Number     Number       Type             X           Y           Z
---------------------------------------------------------------------
1     6    0   	  -0.783534908935	  -2.653888764543	   0.158672065510
2     6    0   	   0.573756411698	  -2.545201554386	   0.754893800382
3     6    0   	   1.939168769738	  -1.387424283799	  -0.936603274315
4     6    0   	   1.346221800827	  -1.106964653831	   0.357326477418
5     6    0   	   0.329326810140	   0.037217436854	   0.479236278593
6     6    0   	   0.821056449033	   1.451616688961	   0.113612625598
7     1    0   	   0.554769698136	  -2.496571833626	   1.844545134055
8     1    0   	   1.232074605334	  -3.371269733809	   0.471964906287
9     1    0   	   2.147719421052	  -1.042651133108	   1.102189220288
10    1    0   	  -0.543590739191	  -0.204893046228	  -0.126652778417
11    1    0   	  -0.034076699235	   0.041966909168	   1.513302536934
12    1    0   	   1.595789993415	   1.773909438214	   0.817907350479
13    6    0   	   4.760572828197	  -0.244472665462	   0.179176201965
14    1    0   	   5.005878301927	  -0.923505256785	   0.996867939882
15    6    0   	   4.423349944871	  -0.919597349745	  -1.113891779157
16    1    0   	   4.183033308479	  -0.211788374456	  -1.910562047421
17    1    0   	   5.284861825704	  -1.502190463070	  -1.462756445852
18    6    0   	   3.267583663808	  -2.018050201109	  -1.008016703053
19    1    0   	   3.473707747349	  -2.615964581155	  -0.114983169600
20    1    0   	   3.344072015245	  -2.648219794804	  -1.899408130280
21    6    0   	   1.229471993373	  -1.143256717441	  -2.212880874326
22    1    0   	   0.431798290262	  -0.403592868063	  -2.150574507289
23    1    0   	   1.933742008852	  -0.890066941674	  -3.013843078780
24    1    0   	   0.778141576545	  -2.105111216531	  -2.519163981002
25    6    0   	  -1.974745168625	  -2.634383917209	   0.800190440045
26    6    0   	  -2.140544477511	  -2.631742741999	   2.297544659066
27    1    0   	  -2.719168311462	  -3.512201560185	   2.604344253650
28    1    0   	  -1.197149321577	  -2.654618994822	   2.845610499736
29    1    0   	  -2.707450029371	  -1.757920862448	   2.634376467509
30    6    0   	  -0.348228354348	   2.438149739023	   0.124964320607
31    6    0   	  -1.394298047128	   2.221138023672	  -0.692783316141
32    6    0   	  -0.241598026365	   3.574066931413	   1.110958568385
33    1    0   	   0.643895292785	   4.187978744484	   0.900538852306
34    1    0   	  -1.112383042742	   4.231509181322	   1.099545951165
35    1    0   	  -0.121829925588	   3.194119699160	   2.134475510894
36    6    0   	  -3.250575441981	  -2.687517170905	  -0.016786822133
37    1    0   	  -3.698127124967	  -3.685775946696	   0.098025649729
38    1    0   	  -2.999309368679	  -2.577006427317	  -1.077298119216
39    6    0   	  -4.351571606415	  -1.651344706405	   0.357467561964
40    1    0   	  -5.152606153168	  -1.766145555596	  -0.378804395590
41    1    0   	  -4.792244715919	  -1.946740213156	   1.318438873380
42    6    0   	  -2.705968554716	   2.952737062038	  -0.767695398984
43    1    0   	  -2.616317968566	   3.974723239646	  -0.387118058761
44    1    0   	  -3.012796545739	   3.043094409149	  -1.816929051879
45    6    0   	  -3.931007386882	  -0.204357552920	   0.472454634210
46    1    0   	  -1.337958280183	   1.354703079904	  -1.354021366179
47    6    0   	  -4.179266500911	   0.819483566010	  -0.367296229921
48    1    0   	  -3.427024769789	   0.051792266442	   1.405146201012
49    6    0   	  -3.826513496632	   2.240009424380	   0.045234268805
50    1    0   	  -3.534749671032	   2.244935684110	   1.101113730153
51    1    0   	  -4.733346564826	   2.856308038160	  -0.034112676915
52    6    0   	  -4.870760144238	   0.679409012498	  -1.702514876694
53    1    0   	  -5.117058320685	  -0.354748159804	  -1.951398563357
54    1    0   	  -5.800829567848	   1.261833102573	  -1.719483625812
55    1    0   	  -4.245378550573	   1.073417190640	  -2.513541236019
56    6    0   	   4.888533354026	   1.078293913089	   0.408830284484
57    1    0   	   1.297959559207	   1.442861643705	  -0.876791056702
58    6    0   	   5.344237613741	   1.578230180571	   1.757704984902
59    1    0   	   6.278847995937	   2.144815333678	   1.662931527275
60    1    0   	   4.606950876184	   2.267328546695	   2.188801341393
61    1    0   	   5.511719996351	   0.763153958581	   2.466464477389
62    6    0   	   4.655361169057	   2.161999850412	  -0.613708326143
63    1    0   	   3.980435750280	   2.927762583019	  -0.213408871129
64    1    0   	   5.599901763520	   2.672439730555	  -0.840363185800
65    1    0   	   4.240295106991	   1.803752078719	  -1.557807635974
66    1    0   	  -0.819761131035	  -2.736265661122	  -0.927197924966
---------------------------------------------------------------------
SCF Done:  E(scf) =  -977.111271958126     A.U.


IRC-IRC-IRC-IRC-IRC-IRC-IRC-IRC-IRC-IRC-IRC-IRC-IRC-IRC-IRC-IRC-IRC-IRC
Pt  45  Step number   1 out of a maximum of  2608
NET REACTION COORDINATE UP TO THIS POINT =    45.00000
IRC-IRC-IRC-IRC-IRC-IRC-IRC-IRC-IRC-IRC-IRC-IRC-IRC-IRC-IRC-IRC-IRC-IRC
                         Input orientation:
---------------------------------------------------------------------
Center     Atomic      Atomic             Coordinates (Angstroms)
Number     Number       Type             X           Y           Z
---------------------------------------------------------------------
1     6    0   	  -0.784332254746	  -2.655254731867	   0.157708119935
2     6    0   	   0.572957534850	  -2.547342394745	   0.753826533468
3     6    0   	   1.940899815018	  -1.387123561769	  -0.935201973459
4     6    0   	   1.345029044256	  -1.108453432865	   0.358028387451
5     6    0   	   0.327174812284	   0.034810343826	   0.479300904293
6     6    0   	   0.820613581738	   1.451169940294	   0.123242135360
7     1    0   	   0.553978105550	  -2.500440426870	   1.843528043729
8     1    0   	   1.231171111446	  -3.373004425322	   0.469539477807
9     1    0   	   2.145292461573	  -1.044312532570	   1.104303105677
10    1    0   	  -0.542258959341	  -0.205380339248	  -0.132655449242
11    1    0   	  -0.042372490453	   0.034921511983	   1.511392143832
12    1    0   	   1.589949935594	   1.770635370448	   0.835111412107
13    6    0   	   4.762224902191	  -0.244194791877	   0.178253584619
14    1    0   	   5.008062057433	  -0.920996251708	   0.997636114831
15    6    0   	   4.425489735808	  -0.922845691404	  -1.113085843934
16    1    0   	   4.186674711481	  -0.217415225555	  -1.912267833206
17    1    0   	   5.286550887468	  -1.507708247618	  -1.459202504734
18    6    0   	   3.268268194800	  -2.019741321950	  -1.004413595840
19    1    0   	   3.473602908264	  -2.616001391795	  -0.110154401279
20    1    0   	   3.343965384941	  -2.651618915931	  -1.894714824492
21    6    0   	   1.235038581802	  -1.138632098030	  -2.212785333687
22    1    0   	   0.457901213948	  -0.379587590211	  -2.155366722783
23    1    0   	   1.940474736668	  -0.912067125132	  -3.018148448656
24    1    0   	   0.755073707758	  -2.087240380928	  -2.505199546888
25    6    0   	  -1.975606240961	  -2.634325630105	   0.799176350483
26    6    0   	  -2.141447206835	  -2.630712556680	   2.296510504602
27    1    0   	  -2.722134548038	  -3.509666271499	   2.603735802401
28    1    0   	  -1.198123397202	  -2.655406176153	   2.844613034245
29    1    0   	  -2.706401375668	  -1.755395759221	   2.632817410901
30    6    0   	  -0.348861200445	   2.437784067463	   0.130570167649
31    6    0   	  -1.393913023500	   2.219679327161	  -0.688193618119
32    6    0   	  -0.242754674852	   3.576414130414	   1.113522571316
33    1    0   	   0.644178188226	   4.188374767266	   0.903304725900
34    1    0   	  -1.112494674661	   4.235236459514	   1.098165963793
35    1    0   	  -0.125873112958	   3.199301379977	   2.138460167275
36    6    0   	  -3.251428318506	  -2.686907012037	  -0.017814963638
37    1    0   	  -3.699041752692	  -3.685185979605	   0.096635240956
38    1    0   	  -3.000177716883	  -2.576048548966	  -1.078294923346
39    6    0   	  -4.352464235351	  -1.650911644012	   0.356798588457
40    1    0   	  -5.153597517564	  -1.765781575232	  -0.379364936051
41    1    0   	  -4.792940496596	  -1.946511269073	   1.317786728112
42    6    0   	  -2.704889085900	   2.952108511634	  -0.767072223503
43    1    0   	  -2.615725578532	   3.974393789780	  -0.387224740981
44    1    0   	  -3.008980705078	   3.041574917731	  -1.817200937983
45    6    0   	  -3.932345847482	  -0.203777110603	   0.471866522182
46    1    0   	  -1.337770845423	   1.351411307531	  -1.346952039487
47    6    0   	  -4.179752436482	   0.819668296280	  -0.368618262054
48    1    0   	  -3.429766859689	   0.052895122497	   1.405165848404
49    6    0   	  -3.827773716567	   2.240477494564	   0.043629642931
50    1    0   	  -3.538733120844	   2.246297367224	   1.100246609179
51    1    0   	  -4.734218047614	   2.856949840272	  -0.038679906787
52    6    0   	  -4.869335314419	   0.678798008398	  -1.704745119245
53    1    0   	  -5.114774062395	  -0.355575692777	  -1.953625942839
54    1    0   	  -5.799631024022	   1.260800842781	  -1.723299902920
55    1    0   	  -4.242949956377	   1.072771323477	  -2.515030690955
56    6    0   	   4.888908714858	   1.079244696722	   0.404695018394
57    1    0   	   1.305550619305	   1.447453710938	  -0.863509726259
58    6    0   	   5.344205775231	   1.582945041805	   1.752294032389
59    1    0   	   6.278588836005	   2.149658412982	   1.655984431282
60    1    0   	   4.606604536785	   2.273001767465	   2.181303416086
61    1    0   	   5.511926690973	   0.769885125360	   2.463277231604
62    6    0   	   4.654523790907	   2.160183707682	  -0.620495914541
63    1    0   	   3.977042384849	   2.925102293455	  -0.222929347542
64    1    0   	   5.598081676862	   2.672464646171	  -0.847064505604
65    1    0   	   4.241755498125	   1.798777221585	  -1.564427445758
66    1    0   	  -0.820810409675	  -2.738452655889	  -0.928116873812
---------------------------------------------------------------------
SCF Done:  E(scf) =  -977.111258071806     A.U.


IRC-IRC-IRC-IRC-IRC-IRC-IRC-IRC-IRC-IRC-IRC-IRC-IRC-IRC-IRC-IRC-IRC-IRC
Pt  46  Step number   1 out of a maximum of  2608
NET REACTION COORDINATE UP TO THIS POINT =    46.00000
IRC-IRC-IRC-IRC-IRC-IRC-IRC-IRC-IRC-IRC-IRC-IRC-IRC-IRC-IRC-IRC-IRC-IRC
                         Input orientation:
---------------------------------------------------------------------
Center     Atomic      Atomic             Coordinates (Angstroms)
Number     Number       Type             X           Y           Z
---------------------------------------------------------------------
1     6    0   	  -0.784820561743	  -2.656756473712	   0.157075229478
2     6    0   	   0.572338681260	  -2.549154117564	   0.753352878500
3     6    0   	   1.942122097710	  -1.385965738268	  -0.933583131424
4     6    0   	   1.343883405276	  -1.109428499481	   0.358911582923
5     6    0   	   0.325039300111	   0.032827888094	   0.478913581488
6     6    0   	   0.819924923697	   1.450503697451	   0.131803363728
7     1    0   	   0.553247653695	  -2.503228444687	   1.843067267126
8     1    0   	   1.230886356626	  -3.374237038596	   0.468247106570
9     1    0   	   2.143000939143	  -1.045311377690	   1.106443666412
10    1    0   	  -0.540569363161	  -0.205515131556	  -0.138675718934
11    1    0   	  -0.050589716833	   0.028961835560	   1.508426726980
12    1    0   	   1.583884753390	   1.767032533003	   0.850181567678
13    6    0   	   4.763664505558	  -0.244209815842	   0.177257158956
14    1    0   	   5.009929657014	  -0.919157842958	   0.997993643844
15    6    0   	   4.427011770875	  -0.925747239646	  -1.112572984529
16    1    0   	   4.189061645914	  -0.221989534437	  -1.913452226522
17    1    0   	   5.287735289137	  -1.512070148329	  -1.456943788546
18    6    0   	   3.268511899198	  -2.020822619779	  -1.001746277780
19    1    0   	   3.472959961568	  -2.616236020807	  -0.106758374263
20    1    0   	   3.343134193678	  -2.653966099639	  -1.891313634734
21    6    0   	   1.238781913819	  -1.133841403836	  -2.211693112187
22    1    0   	   0.458399265171	  -0.372981867243	  -2.153459024768
23    1    0   	   1.948790579219	  -0.906900252883	  -3.017506623419
24    1    0   	   0.758636185604	  -2.088633894359	  -2.506190819514
25    6    0   	  -1.976157544958	  -2.634305565239	   0.798449773291
26    6    0   	  -2.142143050069	  -2.629384381496	   2.295766619780
27    1    0   	  -2.724674559848	  -3.506926763232	   2.603478397199
28    1    0   	  -1.198955690931	  -2.655671279344	   2.844021894897
29    1    0   	  -2.705348428821	  -1.752714970349	   2.631444319560
30    6    0   	  -0.349341935627	   2.437412271667	   0.135275224864
31    6    0   	  -1.393379917283	   2.218526957002	  -0.684572694954
32    6    0   	  -0.243842599698	   3.578236222107	   1.115707514270
33    1    0   	   0.644529253110	   4.188340495163	   0.906173652823
34    1    0   	  -1.112503426142	   4.238308550025	   1.096697165749
35    1    0   	  -0.129946258271	   3.203336982156	   2.141750366191
36    6    0   	  -3.251982636774	  -2.686512493993	  -0.018558755005
37    1    0   	  -3.699685679404	  -3.684772762534	   0.095779279067
38    1    0   	  -3.000682794494	  -2.575598834194	  -1.079017185528
39    6    0   	  -4.353044711144	  -1.650552703617	   0.356137282586
40    1    0   	  -5.154189253658	  -1.765548083046	  -0.379999351196
41    1    0   	  -4.793450952851	  -1.946211156217	   1.317132389354
42    6    0   	  -2.703728364733	   2.951580265703	  -0.766823583205
43    1    0   	  -2.615049944031	   3.974119040842	  -0.387582742552
44    1    0   	  -3.005631442517	   3.040280414622	  -1.817625454324
45    6    0   	  -3.933251440351	  -0.203298651405	   0.471166065758
46    1    0   	  -1.337359030425	   1.349018014566	  -1.341582883171
47    6    0   	  -4.179932056742	   0.819808459389	  -0.369937976565
48    1    0   	  -3.431660631375	   0.053779250698	   1.404874704052
49    6    0   	  -3.828464489638	   2.240825870293	   0.042072103253
50    1    0   	  -3.541475345355	   2.247256301055	   1.099220568058
51    1    0   	  -4.734553658734	   2.857474017277	  -0.042393504446
52    6    0   	  -4.868146693514	   0.678310638093	  -1.706695393429
53    1    0   	  -5.112658506641	  -0.356259005058	  -1.955673912420
54    1    0   	  -5.798827353757	   1.259669980000	  -1.726148202539
55    1    0   	  -4.241302329771	   1.072652734972	  -2.516437942658
56    6    0   	   4.889319952892	   1.079727958192	   0.400983232263
57    1    0   	   1.312024058637	   1.450988043850	  -0.851051931403
58    6    0   	   5.344300047409	   1.586441348451	   1.747536311923
59    1    0   	   6.278505779723	   2.153251159783	   1.650211955418
60    1    0   	   4.606401893560	   2.277036315317	   2.175144936765
61    1    0   	   5.512241776115	   0.774889664971	   2.460176397082
62    6    0   	   4.653832064216	   2.158523796857	  -0.626177236830
63    1    0   	   3.974553977632	   2.922738031075	  -0.230318016969
64    1    0   	   5.596587783696	   2.672303930228	  -0.852624068869
65    1    0   	   4.242623973792	   1.794928603265	  -1.569907485516
66    1    0   	  -0.821129263797	  -2.740563402159	  -0.928736713521
---------------------------------------------------------------------
SCF Done:  E(scf) =  -977.111227874381     A.U.


IRC-IRC-IRC-IRC-IRC-IRC-IRC-IRC-IRC-IRC-IRC-IRC-IRC-IRC-IRC-IRC-IRC-IRC
Pt  47  Step number   1 out of a maximum of  2608
NET REACTION COORDINATE UP TO THIS POINT =    47.00000
IRC-IRC-IRC-IRC-IRC-IRC-IRC-IRC-IRC-IRC-IRC-IRC-IRC-IRC-IRC-IRC-IRC-IRC
                         Input orientation:
---------------------------------------------------------------------
Center     Atomic      Atomic             Coordinates (Angstroms)
Number     Number       Type             X           Y           Z
---------------------------------------------------------------------
1     6    0   	  -0.785256295726	  -2.658172207275	   0.156500461974
2     6    0   	   0.571939053177	  -2.550669821887	   0.752521771724
3     6    0   	   1.943594780401	  -1.386030803397	  -0.932770165796
4     6    0   	   1.343175068984	  -1.110581276097	   0.359264749256
5     6    0   	   0.323740443032	   0.031119726688	   0.478428519896
6     6    0   	   0.819893808063	   1.450451610420	   0.138649140952
7     1    0   	   0.552753952452	  -2.505842391348	   1.842267988328
8     1    0   	   1.230409032582	  -3.375537148832	   0.466635348657
9     1    0   	   2.141391294100	  -1.046397887431	   1.107811183548
10    1    0   	  -0.539040703184	  -0.205850095295	  -0.144081349310
11    1    0   	  -0.056797610204	   0.023890410323	   1.506414071748
12    1    0   	   1.579698372339	   1.764954016315	   0.862987667193
13    6    0   	   4.764696257114	  -0.243983998261	   0.176607341495
14    1    0   	   5.011372881885	  -0.917386272753	   0.998529339773
15    6    0   	   4.428397542573	  -0.928002269914	  -1.112055798336
16    1    0   	   4.191354999174	  -0.226023576905	  -1.914790051812
17    1    0   	   5.288806330500	  -1.515963160695	  -1.454508946111
18    6    0   	   3.269026991298	  -2.022478688661	  -0.998908769587
19    1    0   	   3.473113865611	  -2.616125876359	  -0.102718081566
20    1    0   	   3.343339341906	  -2.657154645993	  -1.887437902566
21    6    0   	   1.242500182950	  -1.129733530845	  -2.211287110853
22    1    0   	   0.493321401905	  -0.342183697007	  -2.160302741085
23    1    0   	   1.949266096712	  -0.942655939314	  -3.024574751226
24    1    0   	   0.721804935095	  -2.062910843737	  -2.483389221930
25    6    0   	  -1.976716806728	  -2.634279942099	   0.797731653356
26    6    0   	  -2.142765902784	  -2.628537407255	   2.295014495294
27    1    0   	  -2.727367637619	  -3.504642960429	   2.602928240466
28    1    0   	  -1.199649897769	  -2.656843193621	   2.843270047780
29    1    0   	  -2.704003881826	  -1.750459251338	   2.630391960062
30    6    0   	  -0.349792911875	   2.437166342708	   0.139145864533
31    6    0   	  -1.393049437336	   2.217495209689	  -0.681499090124
32    6    0   	  -0.244947458136	   3.579611843169	   1.117808433406
33    1    0   	   0.645550041950	   4.187277578758	   0.910076533399
34    1    0   	  -1.112057841224	   4.241736550055	   1.094735859748
35    1    0   	  -0.135296418277	   3.206308702671	   2.144994707071
36    6    0   	  -3.252478166247	  -2.686144839052	  -0.019369002288
37    1    0   	  -3.700215640470	  -3.684427544258	   0.094681070783
38    1    0   	  -3.001148313283	  -2.574945857321	  -1.079792483448
39    6    0   	  -4.353602554381	  -1.650324515328	   0.355537065873
40    1    0   	  -5.154774523403	  -1.765369250039	  -0.380569268088
41    1    0   	  -4.793911533196	  -1.946166610505	   1.316513353811
42    6    0   	  -2.702992523489	   2.951109865152	  -0.766407548324
43    1    0   	  -2.614648539567	   3.973826193604	  -0.387588750918
44    1    0   	  -3.003046488138	   3.039289556929	  -1.817829384657
45    6    0   	  -3.934157759001	  -0.202959186244	   0.470681416131
46    1    0   	  -1.337118097118	   1.346712025229	  -1.336801117486
47    6    0   	  -4.180265977457	   0.819889426477	  -0.370905637363
48    1    0   	  -3.433604751161	   0.054472712737	   1.404851225698
49    6    0   	  -3.829382484247	   2.241104389008	   0.040938164071
50    1    0   	  -3.544360871815	   2.248171548837	   1.098643388981
51    1    0   	  -4.735237623295	   2.857856760792	  -0.045647954334
52    6    0   	  -4.867149066277	   0.677861825010	  -1.708303815935
53    1    0   	  -5.110410929157	  -0.356927936201	  -1.957641881620
54    1    0   	  -5.798366108839	   1.258338193334	  -1.728603191614
55    1    0   	  -4.239899898939	   1.072873151974	  -2.517417640650
56    6    0   	   4.889528837607	   1.080461196150	   0.398101892502
57    1    0   	   1.318323852491	   1.455336925904	  -0.841390095122
58    6    0   	   5.344458102775	   1.589900471983	   1.743692376220
59    1    0   	   6.278384574208	   2.156984486047	   1.645020759627
60    1    0   	   4.606347222047	   2.281118944054	   2.169949436716
61    1    0   	   5.512878622847	   0.779834515982	   2.457929088562
62    6    0   	   4.653057662360	   2.157305471161	  -0.630937394966
63    1    0   	   3.971985370414	   2.920925586102	  -0.236978329158
64    1    0   	   5.595074495350	   2.672421755618	  -0.857453233859
65    1    0   	   4.243379299817	   1.791412813253	  -1.574511075567
66    1    0   	  -0.822100103315	  -2.744163672859	  -0.929111931695
---------------------------------------------------------------------
SCF Done:  E(scf) =  -977.111231882885     A.U.


IRC-IRC-IRC-IRC-IRC-IRC-IRC-IRC-IRC-IRC-IRC-IRC-IRC-IRC-IRC-IRC-IRC-IRC
Pt  48  Step number   1 out of a maximum of  2608
NET REACTION COORDINATE UP TO THIS POINT =    48.00000
IRC-IRC-IRC-IRC-IRC-IRC-IRC-IRC-IRC-IRC-IRC-IRC-IRC-IRC-IRC-IRC-IRC-IRC
                         Input orientation:
---------------------------------------------------------------------
Center     Atomic      Atomic             Coordinates (Angstroms)
Number     Number       Type             X           Y           Z
---------------------------------------------------------------------
1     6    0   	  -0.785930298298	  -2.659961364101	   0.155463088665
2     6    0   	   0.571156576436	  -2.553327612363	   0.751568402068
3     6    0   	   1.945094207305	  -1.384951265885	  -0.930527719130
4     6    0   	   1.341849382861	  -1.112021468537	   0.360699902657
5     6    0   	   0.321150319179	   0.028380717588	   0.478991974775
6     6    0   	   0.818899516384	   1.449480517207	   0.150260734672
7     1    0   	   0.552046235865	  -2.510495929698	   1.841363004273
8     1    0   	   1.229772402140	  -3.377451815812	   0.463993831019
9     1    0   	   2.138612881058	  -1.048239700684	   1.110866610694
10    1    0   	  -0.537197542071	  -0.206254730866	  -0.150229786913
11    1    0   	  -0.066448286475	   0.015896580659	   1.504071356816
12    1    0   	   1.571699984318	   1.760467634592	   0.883090259882
13    6    0   	   4.766815942903	  -0.243887090042	   0.175390179490
14    1    0   	   5.014365500733	  -0.914618544115	   0.999201462426
15    6    0   	   4.430806908859	  -0.932054414393	  -1.111146382728
16    1    0   	   4.195783173449	  -0.232739618588	  -1.916731238093
17    1    0   	   5.290639614070	  -1.522679226937	  -1.450346952472
18    6    0   	   3.269387023811	  -2.023898121688	  -0.995244019809
19    1    0   	   3.472370979751	  -2.616374611255	  -0.098063971212
20    1    0   	   3.342291073088	  -2.660262219067	  -1.882761901323
21    6    0   	   1.247522565646	  -1.123918752481	  -2.209947079678
22    1    0   	   0.502243053659	  -0.330051567511	  -2.159305291127
23    1    0   	   1.957964431002	  -0.942638937015	  -3.023746329254
24    1    0   	   0.719105991737	  -2.056547304130	  -2.481435556709
25    6    0   	  -1.977440486693	  -2.634110814760	   0.796638398401
26    6    0   	  -2.143598271285	  -2.626450812083	   2.293896789331
27    1    0   	  -2.730559891250	  -3.500622897650	   2.602713291984
28    1    0   	  -1.200639243955	  -2.656551865462	   2.842304769783
29    1    0   	  -2.702574421474	  -1.746522909873	   2.628184358569
30    6    0   	  -0.350586860468	   2.436525769390	   0.145634376276
31    6    0   	  -1.392451701880	   2.215945673210	  -0.676540210509
32    6    0   	  -0.246700959038	   3.581572599656	   1.121360523253
33    1    0   	   0.646528382738	   4.185950676435	   0.916031541972
34    1    0   	  -1.111606721534	   4.246211872781	   1.092397572181
35    1    0   	  -0.142885722304	   3.210992634891	   2.150071514601
36    6    0   	  -3.253185480806	  -2.685597098367	  -0.020486358681
37    1    0   	  -3.701031924264	  -3.683844173138	   0.093526706549
38    1    0   	  -3.001775188425	  -2.574481556881	  -1.080898762306
39    6    0   	  -4.354385583269	  -1.649795109828	   0.354297607885
40    1    0   	  -5.155401355774	  -1.764963282837	  -0.381971631710
41    1    0   	  -4.794857462446	  -1.945698635625	   1.315169612221
42    6    0   	  -2.701526775467	   2.950496559569	  -0.765925909152
43    1    0   	  -2.613744139376	   3.973490322924	  -0.387768903908
44    1    0   	  -2.998463860088	   3.037817663661	  -1.818299152717
45    6    0   	  -3.935409645675	  -0.202267701383	   0.469501981672
46    1    0   	  -1.336627956707	   1.343457337814	  -1.329437149152
47    6    0   	  -4.180652908724	   0.820182145588	  -0.372818293321
48    1    0   	  -3.436318969156	   0.055718978654	   1.404286060747
49    6    0   	  -3.830614867554	   2.241699602167	   0.038753109100
50    1    0   	  -3.548776425482	   2.249740773355	   1.097278562997
51    1    0   	  -4.735968841883	   2.858662944102	  -0.051210672352
52    6    0   	  -4.865588045664	   0.677384059659	  -1.711131588087
53    1    0   	  -5.107142776367	  -0.357695127984	  -1.960930820355
54    1    0   	  -5.797521151831	   1.256654938308	  -1.732665091531
55    1    0   	  -4.237760761922	   1.073304505284	  -2.519356205912
56    6    0   	   4.890147627536	   1.081289279897	   0.393015463542
57    1    0   	   1.326672327232	   1.459657039652	  -0.824696227868
58    6    0   	   5.344975608347	   1.595265882503	   1.736877410724
59    1    0   	   6.278265034696	   2.163013915210	   1.636011846315
60    1    0   	   4.606327276675	   2.287093389003	   2.161193589284
61    1    0   	   5.514518395168	   0.787620184795	   2.453531064131
62    6    0   	   4.651830664425	   2.154822017414	  -0.639043031142
63    1    0   	   3.968619354624	   2.917826032446	  -0.247639421124
64    1    0   	   5.592696608336	   2.671591398387	  -0.866505335017
65    1    0   	   4.243639744217	   1.785370399614	  -1.581872585448
66    1    0   	  -0.822707561745	  -2.746803903175	  -0.930119443369
---------------------------------------------------------------------
SCF Done:  E(scf) =  -977.111217041247     A.U.


IRC-IRC-IRC-IRC-IRC-IRC-IRC-IRC-IRC-IRC-IRC-IRC-IRC-IRC-IRC-IRC-IRC-IRC
Pt  49  Step number   1 out of a maximum of  2608
NET REACTION COORDINATE UP TO THIS POINT =    49.00000
IRC-IRC-IRC-IRC-IRC-IRC-IRC-IRC-IRC-IRC-IRC-IRC-IRC-IRC-IRC-IRC-IRC-IRC
                         Input orientation:
---------------------------------------------------------------------
Center     Atomic      Atomic             Coordinates (Angstroms)
Number     Number       Type             X           Y           Z
---------------------------------------------------------------------
1     6    0   	  -0.786418381432	  -2.662059225653	   0.154896811278
2     6    0   	   0.570576498491	  -2.555558663330	   0.750986210315
3     6    0   	   1.946890311269	  -1.384548035152	  -0.928787273206
4     6    0   	   1.340814092964	  -1.113521519638	   0.361698105815
5     6    0   	   0.319159852186	   0.025958435453	   0.478962518981
6     6    0   	   0.818245826636	   1.448900907469	   0.160090550628
7     1    0   	   0.551270221396	  -2.513893426875	   1.840797763532
8     1    0   	   1.229365760149	  -3.379212969201	   0.462563291532
9     1    0   	   2.136330695537	  -1.049774571581	   1.113243598832
10    1    0   	  -0.535323330766	  -0.206640001435	  -0.156378075996
11    1    0   	  -0.074683994013	   0.008993659474	   1.501653312765
12    1    0   	   1.565456424674	   1.756922443381	   0.900072517441
13    6    0   	   4.768607690007	  -0.243680236730	   0.173985942123
14    1    0   	   5.016888115783	  -0.912248123644	   0.999332795744
15    6    0   	   4.432604744896	  -0.935239137626	  -1.110744013360
16    1    0   	   4.198344074506	  -0.238132894421	  -1.918458838548
17    1    0   	   5.291970665267	  -1.527674136449	  -1.447918388335
18    6    0   	   3.270004036837	  -2.025731942364	  -0.991578648787
19    1    0   	   3.472484578222	  -2.616363346500	  -0.093134085473
20    1    0   	   3.341933850130	  -2.663957178578	  -1.877898053674
21    6    0   	   1.252333183121	  -1.118357538525	  -2.208712580590
22    1    0   	   0.529439180939	  -0.304340388659	  -2.162722421260
23    1    0   	   1.961649148593	  -0.965942851302	  -3.027893411380
24    1    0   	   0.693747420758	  -2.036247991296	  -2.465103714423
25    6    0   	  -1.978107852457	  -2.633920786508	   0.795820284573
26    6    0   	  -2.144459629344	  -2.624353790244	   2.293029693059
27    1    0   	  -2.732753861860	  -3.497345248785	   2.602675055242
28    1    0   	  -1.201624853882	  -2.655253248027	   2.841593545410
29    1    0   	  -2.702231164457	  -1.743272479565	   2.626291050113
30    6    0   	  -0.351431691075	   2.435922856596	   0.151567736203
31    6    0   	  -1.391947047303	   2.214646926703	  -0.672130952054
32    6    0   	  -0.248465170208	   3.583051363686	   1.124961594057
33    1    0   	   0.646018017526	   4.185857768153	   0.920354710483
34    1    0   	  -1.112479864999	   4.248726900642	   1.092481015759
35    1    0   	  -0.147462728676	   3.214576718123	   2.154731521287
36    6    0   	  -3.253751240380	  -2.685249381376	  -0.021458960373
37    1    0   	  -3.701694962207	  -3.683449053759	   0.092668984585
38    1    0   	  -3.002176868472	  -2.574374279123	  -1.081855718672
39    6    0   	  -4.355053447260	  -1.649398311190	   0.352961146037
40    1    0   	  -5.155869584210	  -1.764762726448	  -0.383498680248
41    1    0   	  -4.795736370906	  -1.945264439486	   1.313744093057
42    6    0   	  -2.700321684611	   2.949986828317	  -0.765449199208
43    1    0   	  -2.613082330737	   3.973204843347	  -0.387800237544
44    1    0   	  -2.994516172102	   3.036650886499	  -1.818665690899
45    6    0   	  -3.936479135821	  -0.201733760133	   0.468149985462
46    1    0   	  -1.335996389356	   1.340894354056	  -1.323242598430
47    6    0   	  -4.181070551622	   0.820417543693	  -0.374720754446
48    1    0   	  -3.438529484134	   0.056689718607	   1.403416267585
49    6    0   	  -3.831747345644	   2.242140455361	   0.036803174929
50    1    0   	  -3.552547842858	   2.250800091157	   1.096026911740
51    1    0   	  -4.736689942404	   2.859303340827	  -0.055840565315
52    6    0   	  -4.864461642265	   0.677049775429	  -1.713761279603
53    1    0   	  -5.104904800421	  -0.358233368503	  -1.963814058062
54    1    0   	  -5.796847312408	   1.255558377946	  -1.736267054443
55    1    0   	  -4.236100309853	   1.073507027391	  -2.521307165924
56    6    0   	   4.890666861599	   1.082121973611	   0.388479221776
57    1    0   	   1.333747152144	   1.464394544135	  -0.810857811141
58    6    0   	   5.345401356053	   1.599667288237	   1.731018050432
59    1    0   	   6.278186149255	   2.167969818331	   1.628605098839
60    1    0   	   4.606265606182	   2.291837563214	   2.153925040739
61    1    0   	   5.515817402617	   0.793833062587	   2.449515606273
62    6    0   	   4.650773130794	   2.153060337450	  -0.645916431777
63    1    0   	   3.966112100616	   2.915663372461	  -0.256236458311
64    1    0   	   5.590780052277	   2.671031763661	  -0.874191693458
65    1    0   	   4.243499090740	   1.780925626785	  -1.588097925908
66    1    0   	  -0.823406598015	  -2.751303158515	  -0.930496948935
---------------------------------------------------------------------
SCF Done:  E(scf) =  -977.111200910364     A.U.


IRC-IRC-IRC-IRC-IRC-IRC-IRC-IRC-IRC-IRC-IRC-IRC-IRC-IRC-IRC-IRC-IRC-IRC
Pt  50  Step number   1 out of a maximum of  2608
NET REACTION COORDINATE UP TO THIS POINT =    50.00000
IRC-IRC-IRC-IRC-IRC-IRC-IRC-IRC-IRC-IRC-IRC-IRC-IRC-IRC-IRC-IRC-IRC-IRC
                         Input orientation:
---------------------------------------------------------------------
Center     Atomic      Atomic             Coordinates (Angstroms)
Number     Number       Type             X           Y           Z
---------------------------------------------------------------------
1     6    0   	  -0.786867732530	  -2.664344551647	   0.154359593187
2     6    0   	   0.570015923430	  -2.558008092575	   0.750450409166
3     6    0   	   1.948581152217	  -1.383943973094	  -0.926910409738
4     6    0   	   1.339546023903	  -1.115041514333	   0.362720903416
5     6    0   	   0.316623942928	   0.023212706316	   0.478598299009
6     6    0   	   0.817206489728	   1.448020281609	   0.171109232010
7     1    0   	   0.550618164989	  -2.517599224010	   1.840279633888
8     1    0   	   1.229061492697	  -3.381064385052	   0.461017863578
9     1    0   	   2.133665500213	  -1.051163217528	   1.115784413577
10    1    0   	  -0.533137714674	  -0.207043337282	  -0.163820391995
11    1    0   	  -0.084637578724	   0.001068949036	   1.498211524115
12    1    0   	   1.557548716302	   1.752381192050	   0.919429797864
13    6    0   	   4.770570396245	  -0.243543759635	   0.172508506762
14    1    0   	   5.019743043499	  -0.909780651770	   0.999453367587
15    6    0   	   4.434598894387	  -0.938741360202	  -1.110274051095
16    1    0   	   4.201461347887	  -0.244025819852	  -1.920342338552
17    1    0   	   5.293456391005	  -1.533236357514	  -1.445041617000
18    6    0   	   3.270550062289	  -2.027411547931	  -0.987931134410
19    1    0   	   3.472325705559	  -2.616375140732	  -0.088284754425
20    1    0   	   3.341325863227	  -2.667522888494	  -1.873049698670
21    6    0   	   1.257376527305	  -1.112503512919	  -2.207452398108
22    1    0   	   0.549490782970	  -0.284313128868	  -2.164005689198
23    1    0   	   1.967162395176	  -0.978933123436	  -3.029824362403
24    1    0   	   0.677974570356	  -2.020929908813	  -2.455254206324
25    6    0   	  -1.978690353351	  -2.633743502829	   0.795087055853
26    6    0   	  -2.145222085516	  -2.621736812783	   2.292248881548
27    1    0   	  -2.735196126832	  -3.493173309040	   2.603046643399
28    1    0   	  -1.202537572994	  -2.653557559209	   2.841002871382
29    1    0   	  -2.701440509089	  -1.739159708789	   2.624132011370
30    6    0   	  -0.352384423938	   2.435256210045	   0.157880533592
31    6    0   	  -1.391401142524	   2.213342844063	  -0.667537087702
32    6    0   	  -0.250432858226	   3.584615348196	   1.128763843783
33    1    0   	   0.646166150812	   4.184883292459	   0.926023646462
34    1    0   	  -1.112768030471	   4.252172443409	   1.091418951093
35    1    0   	  -0.154071465050	   3.218466374461	   2.159789905095
36    6    0   	  -3.254259422084	  -2.684998596522	  -0.022294086566
37    1    0   	  -3.702389001158	  -3.683081790052	   0.092199741708
38    1    0   	  -3.002519023633	  -2.574673656128	  -1.082706538311
39    6    0   	  -4.355608530942	  -1.648928232449	   0.351492402052
40    1    0   	  -5.156103539142	  -1.764478342036	  -0.385293896002
41    1    0   	  -4.796710267430	  -1.944627850988	   1.312129770263
42    6    0   	  -2.698970937298	   2.949546127276	  -0.765034539451
43    1    0   	  -2.612303522630	   3.973000771321	  -0.387929253993
44    1    0   	  -2.990262777974	   3.035481108763	  -1.819122418782
45    6    0   	  -3.937389239393	  -0.201130178964	   0.466632977013
46    1    0   	  -1.335411619892	   1.338218379455	  -1.316677583334
47    6    0   	  -4.181394576911	   0.820735501048	  -0.376754398496
48    1    0   	  -3.440574867562	   0.057752005201	   1.402364840525
49    6    0   	  -3.832837968928	   2.242693709417	   0.034681206068
50    1    0   	  -3.556468009635	   2.252079719138	   1.094630106739
51    1    0   	  -4.737334707294	   2.860042617256	  -0.060872000935
52    6    0   	  -4.863266684304	   0.676816999828	  -1.716507996285
53    1    0   	  -5.102278731865	  -0.358693568566	  -1.967005315745
54    1    0   	  -5.796274262697	   1.254284958779	  -1.739880567699
55    1    0   	  -4.234520052488	   1.074142402664	  -2.523329111291
56    6    0   	   4.891206285181	   1.082898428384	   0.383670695126
57    1    0   	   1.341806879136	   1.469291360738	  -0.794783284497
58    6    0   	   5.345884500910	   1.604305314201	   1.724723203792
59    1    0   	   6.278013303317	   2.173350515702	   1.620472349837
60    1    0   	   4.606171827095	   2.296767340635	   2.146134693451
61    1    0   	   5.517451401605	   0.800483926237	   2.445179420580
62    6    0   	   4.649521351992	   2.151004532116	  -0.653233752148
63    1    0   	   3.963244224710	   2.913137106984	  -0.265478905526
64    1    0   	   5.588536916220	   2.670304174189	  -0.882537589862
65    1    0   	   4.243221836076	   1.775888051589	  -1.594661605672
66    1    0   	  -0.823918906052	  -2.755819565537	  -0.930872399051
---------------------------------------------------------------------
SCF Done:  E(scf) =  -977.111181582418     A.U.


IRC-IRC-IRC-IRC-IRC-IRC-IRC-IRC-IRC-IRC-IRC-IRC-IRC-IRC-IRC-IRC-IRC-IRC
Pt  51  Step number   1 out of a maximum of  2608
NET REACTION COORDINATE UP TO THIS POINT =    51.00000
IRC-IRC-IRC-IRC-IRC-IRC-IRC-IRC-IRC-IRC-IRC-IRC-IRC-IRC-IRC-IRC-IRC-IRC
                         Input orientation:
---------------------------------------------------------------------
Center     Atomic      Atomic             Coordinates (Angstroms)
Number     Number       Type             X           Y           Z
---------------------------------------------------------------------
1     6    0   	  -0.787228604634	  -2.666846715900	   0.154226808996
2     6    0   	   0.569563459869	  -2.560217917365	   0.750251140319
3     6    0   	   1.950530230737	  -1.383846181449	  -0.925283120173
4     6    0   	   1.338395069255	  -1.116635335586	   0.363423602042
5     6    0   	   0.314266805194	   0.020515728269	   0.477377783978
6     6    0   	   0.816199198041	   1.447215133777	   0.181538527208
7     1    0   	   0.549934892454	  -2.520480891655	   1.840076164921
8     1    0   	   1.228860984320	  -3.382871467394	   0.460358804209
9     1    0   	   2.131117813483	  -1.052200441169	   1.117962135416
10    1    0   	  -0.530470244061	  -0.207379162920	  -0.172394658156
11    1    0   	  -0.094704757362	  -0.006681131668	   1.493694962901
12    1    0   	   1.549712103699	   1.747757269734	   0.938019980654
13    6    0   	   4.772337649420	  -0.243257077612	   0.170775272702
14    1    0   	   5.022320542015	  -0.907437951333	   0.999113712576
15    6    0   	   4.436227812017	  -0.941706100760	  -1.110198455687
16    1    0   	   4.203364912319	  -0.249204285830	  -1.922221904798
17    1    0   	   5.294669866691	  -1.537705596965	  -1.443275595175
18    6    0   	   3.271351765516	  -2.029366217880	  -0.984169900380
19    1    0   	   3.472845409048	  -2.616089692972	  -0.083069701024
20    1    0   	   3.341218917420	  -2.671622553932	  -1.867848333070
21    6    0   	   1.262447879072	  -1.106830084229	  -2.206205478562
22    1    0   	   0.581472322363	  -0.256635424180	  -2.167832801408
23    1    0   	   1.969233239857	  -1.005525033404	  -3.034414941541
24    1    0   	   0.649369933548	  -1.996000378078	  -2.436963399413
25    6    0   	  -1.979270236499	  -2.633594814229	   0.794616168164
26    6    0   	  -2.146092735017	  -2.619106598563	   2.291702168037
27    1    0   	  -2.737195075912	  -3.489385833441	   2.603599937934
28    1    0   	  -1.203564409458	  -2.651281274351	   2.840690855072
29    1    0   	  -2.701353355315	  -1.735413043765	   2.622181416114
30    6    0   	  -0.353387604787	   2.434571677935	   0.163990496471
31    6    0   	  -1.390884479837	   2.212215332324	  -0.663205007373
32    6    0   	  -0.252393305404	   3.585874527068	   1.132682773813
33    1    0   	   0.645725826737	   4.184296985804	   0.931189152102
34    1    0   	  -1.113533711670	   4.254718253783	   1.091477439267
35    1    0   	  -0.159453336513	   3.221735051428	   2.164720058123
36    6    0   	  -3.254685299368	  -2.684922197885	  -0.022991581704
37    1    0   	  -3.703043812722	  -3.682852027259	   0.092008020184
38    1    0   	  -3.002676807366	  -2.575332743559	  -1.083412778416
39    6    0   	  -4.356080751475	  -1.648516856202	   0.349872164208
40    1    0   	  -5.156150068378	  -1.764276663551	  -0.387344796567
41    1    0   	  -4.797754912244	  -1.943945066910	   1.310329529552
42    6    0   	  -2.697699442658	   2.949232458795	  -0.764578651784
43    1    0   	  -2.611600702969	   3.972874290197	  -0.387880250407
44    1    0   	  -2.986277571675	   3.034591572490	  -1.819465368263
45    6    0   	  -3.938132782603	  -0.200611260127	   0.464934610341
46    1    0   	  -1.334782576795	   1.335981593928	  -1.310720050505
47    6    0   	  -4.181678747006	   0.821059731107	  -0.378825173522
48    1    0   	  -3.442258164653	   0.058635320099	   1.401055584138
49    6    0   	  -3.833811535449	   2.243192034648	   0.032682366218
50    1    0   	  -3.560009038096	   2.253093979661	   1.093286232888
51    1    0   	  -4.737901123293	   2.860715128495	  -0.065413051024
52    6    0   	  -4.862272440961	   0.676764108890	  -1.719183780758
53    1    0   	  -5.100216248663	  -0.358908862289	  -1.970042978106
54    1    0   	  -5.795730721363	   1.253471941445	  -1.743270826664
55    1    0   	  -4.233147310861	   1.074748450570	  -2.525383675759
56    6    0   	   4.891652467953	   1.083746683473	   0.379051534543
57    1    0   	   1.349660582832	   1.474674081941	  -0.779222272924
58    6    0   	   5.346203642301	   1.608431675737	   1.718867261298
59    1    0   	   6.277739962039	   2.178175202360	   1.613178824868
60    1    0   	   4.605911370748	   2.301022424335	   2.139042762551
61    1    0   	   5.518761399516	   0.806287969294	   2.440951262201
62    6    0   	   4.648383269002	   2.149421560068	  -0.659971038740
63    1    0   	   3.960822521173	   2.911183438730	  -0.273751734986
64    1    0   	   5.586570919848	   2.669808291847	  -0.890177760429
65    1    0   	   4.242842156253	   1.771785614758	  -1.600720572662
66    1    0   	  -0.824479920905	  -2.761462366105	  -0.930736929000
---------------------------------------------------------------------
SCF Done:  E(scf) =  -977.111162496577     A.U.


IRC-IRC-IRC-IRC-IRC-IRC-IRC-IRC-IRC-IRC-IRC-IRC-IRC-IRC-IRC-IRC-IRC-IRC
Pt  52  Step number   1 out of a maximum of  2608
NET REACTION COORDINATE UP TO THIS POINT =    52.00000
IRC-IRC-IRC-IRC-IRC-IRC-IRC-IRC-IRC-IRC-IRC-IRC-IRC-IRC-IRC-IRC-IRC-IRC
                         Input orientation:
---------------------------------------------------------------------
Center     Atomic      Atomic             Coordinates (Angstroms)
Number     Number       Type             X           Y           Z
---------------------------------------------------------------------
1     6    0   	  -0.787457842673	  -2.668361130285	   0.154375004817
2     6    0   	   0.569269473196	  -2.561365862281	   0.750398053634
3     6    0   	   1.951822238401	  -1.383555809083	  -0.924367973163
4     6    0   	   1.337701735655	  -1.117556543060	   0.363736723370
5     6    0   	   0.312979744526	   0.019037657928	   0.476461870692
6     6    0   	   0.815591248943	   1.446695776134	   0.187050224707
7     1    0   	   0.549443075104	  -2.521599704763	   1.840200049186
8     1    0   	   1.228825338872	  -3.383792710678	   0.460529271799
9     1    0   	   2.129710794557	  -1.052676765980	   1.119021533460
10    1    0   	  -0.528928740607	  -0.207490448683	  -0.177281476381
11    1    0   	  -0.100144696250	  -0.010709310132	   1.490870340270
12    1    0   	   1.545879877839	   1.745189500367	   0.947319896445
13    6    0   	   4.773117913784	  -0.243061074558	   0.169713722026
14    1    0   	   5.023412594101	  -0.906185004170	   0.998793355556
15    6    0   	   4.436809443511	  -0.943186449219	  -1.110250832455
16    1    0   	   4.203466392731	  -0.251596354619	  -1.922928653257
17    1    0   	   5.295132240169	  -1.539465761135	  -1.443025419700
18    6    0   	   3.271791315480	  -2.030635610997	  -0.982090140409
19    1    0   	   3.473206437669	  -2.616343973190	  -0.080378567165
20    1    0   	   3.341158952216	  -2.673726808773	  -1.865274732142
21    6    0   	   1.265706785274	  -1.103371605640	  -2.205584665346
22    1    0   	   0.594029802918	  -0.242362881462	  -2.169618865736
23    1    0   	   1.972452621378	  -1.018296384396	  -3.037144009581
24    1    0   	   0.636666527023	  -1.988450087074	  -2.428412688322
25    6    0   	  -1.979671592389	  -2.633526814491	   0.794471505099
26    6    0   	  -2.146690905717	  -2.617725771769	   2.291518080843
27    1    0   	  -2.738054885008	  -3.487662228610	   2.603984584849
28    1    0   	  -1.204197844736	  -2.649893999027	   2.840600769860
29    1    0   	  -2.701708796754	  -1.733655937479	   2.621373609088
30    6    0   	  -0.353985242939	   2.434099285128	   0.167502100798
31    6    0   	  -1.390538602879	   2.211648081467	  -0.660842364258
32    6    0   	  -0.253424863419	   3.586584695285	   1.134814549629
33    1    0   	   0.644627319660	   4.184886191451	   0.932556688505
34    1    0   	  -1.114609124214	   4.255241943428	   1.092501197549
35    1    0   	  -0.160474668948	   3.223698648679	   2.167224413170
36    6    0   	  -3.254967656319	  -2.684872460112	  -0.023335134446
37    1    0   	  -3.703439514827	  -3.682723750551	   0.091951935040
38    1    0   	  -3.002757849731	  -2.575665752098	  -1.083737030944
39    6    0   	  -4.356352665347	  -1.648266725588	   0.349034388239
40    1    0   	  -5.156341475635	  -1.764223207592	  -0.388221557572
41    1    0   	  -4.798125488270	  -1.943463539309	   1.309529613871
42    6    0   	  -2.696926441710	   2.949103099539	  -0.764397776699
43    1    0   	  -2.611217223128	   3.972879130203	  -0.387993445674
44    1    0   	  -2.984171610577	   3.034071645252	  -1.819684487133
45    6    0   	  -3.938461167504	  -0.200319551231	   0.463913599155
46    1    0   	  -1.334350297201	   1.335008699250	  -1.307761896318
47    6    0   	  -4.181696575579	   0.821255513403	  -0.380048427840
48    1    0   	  -3.442958693848	   0.059071040852	   1.400198396119
49    6    0   	  -3.834116320950	   2.243430479905	   0.031609763086
50    1    0   	  -3.561395798778	   2.253400871975	   1.092497844794
51    1    0   	  -4.738027598085	   2.861047928407	  -0.067429836049
52    6    0   	  -4.861789449521	   0.676768917489	  -1.720626026906
53    1    0   	  -5.099530899495	  -0.358982563637	  -1.971376255100
54    1    0   	  -5.795378528124	   1.253272087945	  -1.744889192032
55    1    0   	  -4.232545672810	   1.074832630397	  -2.526659986724
56    6    0   	   4.891810765962	   1.084232429638	   0.376398448470
57    1    0   	   1.353191423363	   1.477446700713	  -0.771286227931
58    6    0   	   5.346207933999	   1.610391488148	   1.715718793591
59    1    0   	   6.277564372818	   2.180349780791	   1.609821543610
60    1    0   	   4.605610163364	   2.302785814273	   2.135697217291
61    1    0   	   5.519124005462	   0.808787031996	   2.438406671178
62    6    0   	   4.647832785762	   2.148824240705	  -0.663527383886
63    1    0   	   3.959889877318	   2.910410376522	  -0.277517574930
64    1    0   	   5.585731048270	   2.669693331594	  -0.893798688694
65    1    0   	   4.242479055785	   1.770337445837	  -1.603961363615
66    1    0   	  -0.824782167503	  -2.764422377295	  -0.930487130884
---------------------------------------------------------------------
SCF Done:  E(scf) =  -977.111136162737     A.U.


IRC-IRC-IRC-IRC-IRC-IRC-IRC-IRC-IRC-IRC-IRC-IRC-IRC-IRC-IRC-IRC-IRC-IRC
Pt  53  Step number   1 out of a maximum of  2608
NET REACTION COORDINATE UP TO THIS POINT =    53.00000
IRC-IRC-IRC-IRC-IRC-IRC-IRC-IRC-IRC-IRC-IRC-IRC-IRC-IRC-IRC-IRC-IRC-IRC
                         Input orientation:
---------------------------------------------------------------------
Center     Atomic      Atomic             Coordinates (Angstroms)
Number     Number       Type             X           Y           Z
---------------------------------------------------------------------
1     6    0   	  -0.787719904150	  -2.670196820868	   0.154205672873
2     6    0   	   0.568901860447	  -2.562980358350	   0.750283827581
3     6    0   	   1.953030298625	  -1.384528602626	  -0.923288607545
4     6    0   	   1.336984485201	  -1.118974322579	   0.364246468090
5     6    0   	   0.311554148004	   0.017071086581	   0.475552989670
6     6    0   	   0.815203813607	   1.446231564459	   0.194367033424
7     1    0   	   0.548721346938	  -2.523712158635	   1.840087893755
8     1    0   	   1.228484610413	  -3.385327448026	   0.460300850007
9     1    0   	   2.127998566672	  -1.053656376492	   1.120572822402
10    1    0   	  -0.526914974449	  -0.207790524014	  -0.183501282378
11    1    0   	  -0.107125352814	  -0.016338378601	   1.487780228543
12    1    0   	   1.540251672067	   1.741945654323	   0.961047243168
13    6    0   	   4.773906196286	  -0.242480707232	   0.168675379543
14    1    0   	   5.024570691990	  -0.903953776449	   0.998971342341
15    6    0   	   4.437896090266	  -0.945207980375	  -1.109991077831
16    1    0   	   4.204988189280	  -0.255624490642	  -1.924485736417
17    1    0   	   5.296032544549	  -1.542757816538	  -1.441022857203
18    6    0   	   3.272484778511	  -2.032301300555	  -0.979164644354
19    1    0   	   3.473875314013	  -2.615843872040	  -0.076076620914
20    1    0   	   3.341548628669	  -2.677345794492	  -1.860902980788
21    6    0   	   1.268844135591	  -1.099710836950	  -2.204429357006
22    1    0   	   0.632698543013	  -0.214911872952	  -2.174131138122
23    1    0   	   1.969007088946	  -1.049642437251	  -3.042078172773
24    1    0   	   0.601888867063	  -1.955306629054	  -2.407440349579
25    6    0   	  -1.980148966104	  -2.633560302079	   0.793962863095
26    6    0   	  -2.147513015027	  -2.616190569875	   2.290928970867
27    1    0   	  -2.740169039624	  -3.485026036861	   2.603934666972
28    1    0   	  -1.205235859521	  -2.649092806407	   2.840290639363
29    1    0   	  -2.701493377983	  -1.731107687910	   2.619813724753
30    6    0   	  -0.354490294687	   2.433661712244	   0.171628806231
31    6    0   	  -1.389949313226	   2.211012232965	  -0.658023310573
32    6    0   	  -0.254888434017	   3.587003250108	   1.138059474642
33    1    0   	   0.645560138136	   4.182840912172	   0.938792871435
34    1    0   	  -1.114337883816	   4.257830659789	   1.091674539863
35    1    0   	  -0.166968954134	   3.224967138574	   2.171386561574
36    6    0   	  -3.255260168551	  -2.684870939700	  -0.024105809553
37    1    0   	  -3.703956693041	  -3.682603316534	   0.091364337013
38    1    0   	  -3.002805256681	  -2.576063424405	  -1.084496946830
39    6    0   	  -4.356677530815	  -1.648031199852	   0.347658442732
40    1    0   	  -5.156217896303	  -1.763921635481	  -0.390113059501
41    1    0   	  -4.799089791889	  -1.943190784967	   1.307861028943
42    6    0   	  -2.695920807199	   2.948955488989	  -0.763923868968
43    1    0   	  -2.610539184426	   3.972803408033	  -0.387653434737
44    1    0   	  -2.981357628006	   3.033682625002	  -1.819732527204
45    6    0   	  -3.938926202845	  -0.200049218490	   0.462800679907
46    1    0   	  -1.333525333078	   1.333683215614	  -1.303893968130
47    6    0   	  -4.181698789339	   0.821494041431	  -0.381339447236
48    1    0   	  -3.444236991628	   0.059489768557	   1.399460692990
49    6    0   	  -3.834578860208	   2.243751275362	   0.030468414283
50    1    0   	  -3.563639434531	   2.254050025091	   1.091806603690
51    1    0   	  -4.738208845396	   2.861495917799	  -0.070361483153
52    6    0   	  -4.860648450323	   0.676931351484	  -1.722499145754
53    1    0   	  -5.097314161844	  -0.358905700273	  -1.973923679006
54    1    0   	  -5.794650166400	   1.252728298074	  -1.747412095791
55    1    0   	  -4.231028938166	   1.075802589028	  -2.527870528100
56    6    0   	   4.891835043965	   1.085264980793	   0.373054534434
57    1    0   	   1.359680207421	   1.481785625200	  -0.760006955565
58    6    0   	   5.346087937368	   1.614202080909	   1.711319902379
59    1    0   	   6.277248669704	   2.184248984731	   1.603999674694
60    1    0   	   4.605320285135	   2.307443867188	   2.129565887720
61    1    0   	   5.519212449710	   0.814229839287	   2.435695506878
62    6    0   	   4.647111184956	   2.147751642275	  -0.668888256399
63    1    0   	   3.958160362388	   2.909345539526	  -0.284802549245
64    1    0   	   5.584484408643	   2.669148084097	  -0.900122528366
65    1    0   	   4.242544473549	   1.766938623120	  -1.608787701689
66    1    0   	  -0.825207229482	  -2.769280142954	  -0.930354684692
---------------------------------------------------------------------
SCF Done:  E(scf) =  -977.111131633020     A.U.


IRC-IRC-IRC-IRC-IRC-IRC-IRC-IRC-IRC-IRC-IRC-IRC-IRC-IRC-IRC-IRC-IRC-IRC
Pt  54  Step number   1 out of a maximum of  2608
NET REACTION COORDINATE UP TO THIS POINT =    54.00000
IRC-IRC-IRC-IRC-IRC-IRC-IRC-IRC-IRC-IRC-IRC-IRC-IRC-IRC-IRC-IRC-IRC-IRC
                         Input orientation:
---------------------------------------------------------------------
Center     Atomic      Atomic             Coordinates (Angstroms)
Number     Number       Type             X           Y           Z
---------------------------------------------------------------------
1     6    0   	  -0.788056851684	  -2.671799496933	   0.154128336754
2     6    0   	   0.568432874403	  -2.564627723459	   0.750365329987
3     6    0   	   1.954310235532	  -1.383902350225	  -0.921576473719
4     6    0   	   1.336197121968	  -1.120022818839	   0.365318485994
5     6    0   	   0.309952625136	   0.015187179618	   0.475502877217
6     6    0   	   0.814440823563	   1.445316138190	   0.201568274337
7     1    0   	   0.548077694968	  -2.525869400179	   1.840162438668
8     1    0   	   1.228267350404	  -3.386584773940	   0.459959677656
9     1    0   	   2.126251502085	  -1.054573498053	   1.122644786706
10    1    0   	  -0.525315756366	  -0.208123078919	  -0.188057586843
11    1    0   	  -0.113485385471	  -0.021325718993	   1.485537791313
12    1    0   	   1.535602561817	   1.738684903473	   0.972836919433
13    6    0   	   4.774782829106	  -0.242082705993	   0.167500515302
14    1    0   	   5.025684202237	  -0.901775498297	   0.999100026550
15    6    0   	   4.438896946588	  -0.947552408497	  -1.109643315983
16    1    0   	   4.206418143144	  -0.259620459912	  -1.925639087307
17    1    0   	   5.296850042150	  -1.546152383180	  -1.439159239740
18    6    0   	   3.272770598896	  -2.033608896515	  -0.976500215929
19    1    0   	   3.473857062079	  -2.616238812351	  -0.072809629433
20    1    0   	   3.340938533025	  -2.679634227427	  -1.857669745942
21    6    0   	   1.272212878916	  -1.095487198024	  -2.202979575498
22    1    0   	   0.640722700538	  -0.203619943824	  -2.173867777070
23    1    0   	   1.972799387466	  -1.055450478307	  -3.042304837444
24    1    0   	   0.595297147716	  -1.949672440821	  -2.402199536481
25    6    0   	  -1.980698036838	  -2.633508729995	   0.793508195556
26    6    0   	  -2.148399569721	  -2.614687736538	   2.290410877940
27    1    0   	  -2.741348865153	  -3.483069570869	   2.604050944902
28    1    0   	  -1.206267411532	  -2.647440654753	   2.840016800902
29    1    0   	  -2.702152455976	  -1.729193326180	   2.618440028989
30    6    0   	  -0.355090302180	   2.432917433264	   0.176154823329
31    6    0   	  -1.389292960018	   2.210281629293	  -0.655037745275
32    6    0   	  -0.256282303055	   3.587330368132	   1.141375055623
33    1    0   	   0.645844041940	   4.181138371525	   0.944030018990
34    1    0   	  -1.114125723026	   4.259732464477	   1.091365731622
35    1    0   	  -0.172182124887	   3.226557851064	   2.175309856837
36    6    0   	  -3.255610587413	  -2.684767278447	  -0.024879117106
37    1    0   	  -3.704454639837	  -3.682410560815	   0.090845568742
38    1    0   	  -3.002807124782	  -2.576410137698	  -1.085222914332
39    6    0   	  -4.357096312606	  -1.647711601497	   0.346170576905
40    1    0   	  -5.156240704351	  -1.763656037032	  -0.392019778041
41    1    0   	  -4.800049727466	  -1.942778301623	   1.306165421333
42    6    0   	  -2.694696563199	   2.948790639703	  -0.763544493274
43    1    0   	  -2.609715255408	   3.972756903278	  -0.387525764605
44    1    0   	  -2.978416925547	   3.033141404280	  -1.819839351797
45    6    0   	  -3.939429613275	  -0.199700995326	   0.461483345007
46    1    0   	  -1.332679739873	   1.332480608273	  -1.300188573048
47    6    0   	  -4.181555121618	   0.821815039531	  -0.382872016641
48    1    0   	  -3.445526918245	   0.059905846518	   1.398539809529
49    6    0   	  -3.834794954711	   2.244094065397	   0.029203394552
50    1    0   	  -3.565411956567	   2.254510779730	   1.090933956565
51    1    0   	  -4.738139381239	   2.862009089056	  -0.073030192677
52    6    0   	  -4.859448126009	   0.677177789378	  -1.724545411348
53    1    0   	  -5.095570522887	  -0.358728071073	  -1.976208361834
54    1    0   	  -5.793675014049	   1.252596523255	  -1.749963112932
55    1    0   	  -4.229431773827	   1.076419978756	  -2.529399446424
56    6    0   	   4.891963771714	   1.086085899373	   0.369220511281
57    1    0   	   1.363895632128	   1.484288968399	  -0.749887070480
58    6    0   	   5.345887502755	   1.617746175509	   1.706526992720
59    1    0   	   6.276787101890	   2.188068103830	   1.598432335156
60    1    0   	   4.604726460759	   2.311156492221	   2.123780249331
61    1    0   	   5.519471197514	   0.819062832307	   2.432266031020
62    6    0   	   4.646553191226	   2.146513604262	  -0.674617362561
63    1    0   	   3.957176009188	   2.908282795976	  -0.291571848241
64    1    0   	   5.583582324160	   2.668175562846	  -0.906609329271
65    1    0   	   4.242152266726	   1.763860069751	  -1.613791659472
66    1    0   	  -0.825470763015	  -2.772068259401	  -0.930337346200
---------------------------------------------------------------------
SCF Done:  E(scf) =  -977.111108566733     A.U.


IRC-IRC-IRC-IRC-IRC-IRC-IRC-IRC-IRC-IRC-IRC-IRC-IRC-IRC-IRC-IRC-IRC-IRC
Pt  55  Step number   1 out of a maximum of  2608
NET REACTION COORDINATE UP TO THIS POINT =    55.00000
IRC-IRC-IRC-IRC-IRC-IRC-IRC-IRC-IRC-IRC-IRC-IRC-IRC-IRC-IRC-IRC-IRC-IRC
                         Input orientation:
---------------------------------------------------------------------
Center     Atomic      Atomic             Coordinates (Angstroms)
Number     Number       Type             X           Y           Z
---------------------------------------------------------------------
1     6    0   	  -0.788371956886	  -2.673643753876	   0.153851942966
2     6    0   	   0.567933804635	  -2.566409769081	   0.750335256460
3     6    0   	   1.955379811315	  -1.385150393986	  -0.920038436937
4     6    0   	   1.335611538792	  -1.121511625251	   0.366278100428
5     6    0   	   0.308895174571	   0.013337320494	   0.475024580521
6     6    0   	   0.814106553262	   1.444633488724	   0.208533928673
7     1    0   	   0.547123549742	  -2.528210286130	   1.840141343857
8     1    0   	   1.227806980221	  -3.388279214852	   0.459840713736
9     1    0   	   2.124648481994	  -1.055900391846	   1.124677202187
10    1    0   	  -0.522953747140	  -0.208246614290	  -0.193318091692
11    1    0   	  -0.119584501270	  -0.026292983764	   1.482718938932
12    1    0   	   1.530277376379	   1.735389944204	   0.985211935449
13    6    0   	   4.775429921936	  -0.241263322965	   0.166315899558
14    1    0   	   5.026569990280	  -0.899306967114	   0.999188290464
15    6    0   	   4.439669239188	  -0.949364070474	  -1.109474351770
16    1    0   	   4.207144262769	  -0.263397440138	  -1.927103742626
17    1    0   	   5.297455315374	  -1.548921661603	  -1.437633907252
18    6    0   	   3.273432243240	  -2.035332099063	  -0.973325797391
19    1    0   	   3.474789567328	  -2.615644492249	  -0.068221734460
20    1    0   	   3.341238138923	  -2.683399419846	  -1.853000200283
21    6    0   	   1.275068462151	  -1.092058757282	  -2.201290029169
22    1    0   	   0.681973326199	  -0.176590744375	  -2.178231480748
23    1    0   	   1.967580305578	  -1.088103398663	  -3.046285827593
24    1    0   	   0.560099140208	  -1.913780132893	  -2.381167676316
25    6    0   	  -1.981271826168	  -2.633548374369	   0.792820051427
26    6    0   	  -2.149374185037	  -2.613350098280	   2.289628211829
27    1    0   	  -2.741888184952	  -3.481843908616	   2.603848936391
28    1    0   	  -1.207386206688	  -2.644946249232	   2.839535788137
29    1    0   	  -2.703866030838	  -1.727940388560	   2.616644552641
30    6    0   	  -0.355483013167	   2.432229395411	   0.180316026821
31    6    0   	  -1.388560130590	   2.209636388353	  -0.652301372384
32    6    0   	  -0.257661476088	   3.587209861236	   1.144983091874
33    1    0   	   0.643184917164	   4.182472904367	   0.946680841126
34    1    0   	  -1.116632380195	   4.258150535721	   1.095723857497
35    1    0   	  -0.171923104600	   3.226917743677	   2.178850682692
36    6    0   	  -3.255963681362	  -2.684673066784	  -0.025890152981
37    1    0   	  -3.705062980231	  -3.682200137274	   0.089878520420
38    1    0   	  -3.002870183046	  -2.576580067978	  -1.086193120187
39    6    0   	  -4.357422315088	  -1.647382931844	   0.344680641882
40    1    0   	  -5.156192609835	  -1.763208578350	  -0.393926094984
41    1    0   	  -4.800916036566	  -1.942450552244	   1.304406454643
42    6    0   	  -2.693515226954	   2.948717151338	  -0.763025017686
43    1    0   	  -2.608774191534	   3.972719145081	  -0.387066022972
44    1    0   	  -2.975437450588	   3.032984524328	  -1.819826813845
45    6    0   	  -3.939839352634	  -0.199356345741	   0.460278654637
46    1    0   	  -1.331637778144	   1.331450527257	  -1.296824780606
47    6    0   	  -4.181475664670	   0.822144071631	  -0.384242296319
48    1    0   	  -3.446699273422	   0.060355517250	   1.397697137100
49    6    0   	  -3.835132636620	   2.244488475843	   0.028009581188
50    1    0   	  -3.567559057622	   2.255189849063	   1.090197637090
51    1    0   	  -4.738174016538	   2.862549632434	  -0.076003298266
52    6    0   	  -4.858234705737	   0.677435087838	  -1.726481539677
53    1    0   	  -5.094171355696	  -0.358463323852	  -1.978340240637
54    1    0   	  -5.792376020828	   1.252935923816	  -1.752844335130
55    1    0   	  -4.227446652348	   1.076570538879	  -2.530799498853
56    6    0   	   4.891953275890	   1.087368803167	   0.365622243965
57    1    0   	   1.369553413940	   1.487812606464	  -0.738935746592
58    6    0   	   5.345410932630	   1.621852719516	   1.701963132321
59    1    0   	   6.275465574054	   2.193295813944	   1.592610487000
60    1    0   	   4.603335899930	   2.315064212833	   2.117911412789
61    1    0   	   5.520148216723	   0.824728303471	   2.429086550930
62    6    0   	   4.646157951659	   2.145640891662	  -0.680349536474
63    1    0   	   3.956453980030	   2.907980787717	  -0.299097125876
64    1    0   	   5.583003165520	   2.667091893754	  -0.913564127196
65    1    0   	   4.242018074312	   1.760807134652	  -1.618787074548
66    1    0   	  -0.825822560248	  -2.776763004433	  -0.930337295944
---------------------------------------------------------------------
SCF Done:  E(scf) =  -977.111100952486     A.U.


IRC-IRC-IRC-IRC-IRC-IRC-IRC-IRC-IRC-IRC-IRC-IRC-IRC-IRC-IRC-IRC-IRC-IRC
Pt  56  Step number   1 out of a maximum of  2608
NET REACTION COORDINATE UP TO THIS POINT =    56.00000
IRC-IRC-IRC-IRC-IRC-IRC-IRC-IRC-IRC-IRC-IRC-IRC-IRC-IRC-IRC-IRC-IRC-IRC
                         Input orientation:
---------------------------------------------------------------------
Center     Atomic      Atomic             Coordinates (Angstroms)
Number     Number       Type             X           Y           Z
---------------------------------------------------------------------
1     6    0   	  -0.788721130491	  -2.675537744895	   0.153394831715
2     6    0   	   0.567312505309	  -2.568378122853	   0.750345683238
3     6    0   	   1.956542855271	  -1.384811095446	  -0.917762230890
4     6    0   	   1.335019097645	  -1.122726941979	   0.367964789458
5     6    0   	   0.307891358846	   0.011690450591	   0.476163702963
6     6    0   	   0.813545211359	   1.443693372058	   0.214245371767
7     1    0   	   0.546042140740	  -2.530833007423	   1.840138444285
8     1    0   	   1.227542101947	  -3.389808097485	   0.459524779918
9     1    0   	   2.123104137093	  -1.057608229371	   1.127383196910
10    1    0   	  -0.522085337836	  -0.208807100876	  -0.194820563481
11    1    0   	  -0.123190675404	  -0.029843056824	   1.482631290548
12    1    0   	   1.527762823100	   1.732978084795	   0.993278319246
13    6    0   	   4.776038375252	  -0.240589605564	   0.165039182320
14    1    0   	   5.027207720538	  -0.896796890108	   0.999318659013
15    6    0   	   4.440301067143	  -0.951509772610	  -1.109177424984
16    1    0   	   4.207492779092	  -0.267130844103	  -1.928083024505
17    1    0   	   5.298026146077	  -1.551659251943	  -1.436411582571
18    6    0   	   3.273773241141	  -2.036720062174	  -0.970279398389
19    1    0   	   3.475131956249	  -2.615809953737	  -0.064448028284
20    1    0   	   3.340661063339	  -2.686077358422	  -1.849123294035
21    6    0   	   1.277724795220	  -1.088184710845	  -2.198907304026
22    1    0   	   0.689369703528	  -0.166316570359	  -2.176402747579
23    1    0   	   1.969946445595	  -1.092819899015	  -3.045845022828
24    1    0   	   0.553651088750	  -1.907704395594	  -2.374853929311
25    6    0   	  -1.981876245005	  -2.633649736894	   0.791904044983
26    6    0   	  -2.150298417823	  -2.612140187678	   2.288645463430
27    1    0   	  -2.743296089903	  -3.480192088725	   2.603315091934
28    1    0   	  -1.208410891131	  -2.643941255293	   2.838741273196
29    1    0   	  -2.704403198303	  -1.726252049983	   2.615016734280
30    6    0   	  -0.355978507882	   2.431397794692	   0.184666985555
31    6    0   	  -1.387793277489	   2.209193207520	  -0.649587909989
32    6    0   	  -0.258841222048	   3.586960510772	   1.148695773731
33    1    0   	   0.641442376627	   4.183041056473	   0.949216667520
34    1    0   	  -1.118621365508	   4.257077511108	   1.099358669321
35    1    0   	  -0.171964211974	   3.227340287123	   2.182854821623
36    6    0   	  -3.256426174198	  -2.684483956849	  -0.027040002206
37    1    0   	  -3.705778394040	  -3.681890033999	   0.088850479275
38    1    0   	  -3.003156855429	  -2.576627725945	  -1.087316838354
39    6    0   	  -4.357726304563	  -1.646932281912	   0.343332667930
40    1    0   	  -5.156548140290	  -1.762793190715	  -0.395206689578
41    1    0   	  -4.801200922212	  -1.941851112594	   1.303119213675
42    6    0   	  -2.692255501419	   2.948771659704	  -0.762614528374
43    1    0   	  -2.607907730714	   3.972846597426	  -0.386773292487
44    1    0   	  -2.972526595086	   3.032839385930	  -1.819866135296
45    6    0   	  -3.940101729112	  -0.198898225748	   0.458898831041
46    1    0   	  -1.330358266575	   1.330969508831	  -1.293985286477
47    6    0   	  -4.181164266305	   0.822551769156	  -0.385842453123
48    1    0   	  -3.447569120351	   0.060926075930	   1.396603318007
49    6    0   	  -3.835202004096	   2.244902688418	   0.026739834430
50    1    0   	  -3.569108807882	   2.255609896420	   1.089292151381
51    1    0   	  -4.738010224628	   2.863075110512	  -0.078530200030
52    6    0   	  -4.857069811345	   0.677709961229	  -1.728488460544
53    1    0   	  -5.092917205002	  -0.358241255138	  -1.980258004381
54    1    0   	  -5.791241387468	   1.253153556230	  -1.755355611081
55    1    0   	  -4.225894373104	   1.076746408355	  -2.532531405619
56    6    0   	   4.891969193928	   1.088464509667	   0.361574402006
57    1    0   	   1.371513070936	   1.489195573647	  -0.731692299231
58    6    0   	   5.344721376439	   1.625566851377	   1.697127220949
59    1    0   	   6.274496540619	   2.197362473390	   1.587418673695
60    1    0   	   4.602033854464	   2.318716047961	   2.112107010128
61    1    0   	   5.519755471863	   0.829544710642	   2.425456689372
62    6    0   	   4.645935743478	   2.144773698941	  -0.686306959173
63    1    0   	   3.955738695240	   2.907305909501	  -0.306196891302
64    1    0   	   5.582572942688	   2.666512379356	  -0.919708310274
65    1    0   	   4.242300703271	   1.758394495859	  -1.624293158357
66    1    0   	  -0.825982700843	  -2.780263759045	  -0.930644270317
---------------------------------------------------------------------
SCF Done:  E(scf) =  -977.111078698323     A.U.


IRC-IRC-IRC-IRC-IRC-IRC-IRC-IRC-IRC-IRC-IRC-IRC-IRC-IRC-IRC-IRC-IRC-IRC
Pt  57  Step number   1 out of a maximum of  2608
NET REACTION COORDINATE UP TO THIS POINT =    57.00000
IRC-IRC-IRC-IRC-IRC-IRC-IRC-IRC-IRC-IRC-IRC-IRC-IRC-IRC-IRC-IRC-IRC-IRC
                         Input orientation:
---------------------------------------------------------------------
Center     Atomic      Atomic             Coordinates (Angstroms)
Number     Number       Type             X           Y           Z
---------------------------------------------------------------------
1     6    0   	  -0.788985254671	  -2.677125511102	   0.152882647337
2     6    0   	   0.566911673023	  -2.570049253670	   0.750021616506
3     6    0   	   1.957328247859	  -1.386043690111	  -0.916521065060
4     6    0   	   1.334410905993	  -1.123887255538	   0.368625970790
5     6    0   	   0.306535186405	   0.009901271418	   0.475726698312
6     6    0   	   0.812986257675	   1.443050350323	   0.220907218828
7     1    0   	   0.545458666298	  -2.533037340983	   1.839831036029
8     1    0   	   1.227202213346	  -3.391277460049	   0.458878404647
9     1    0   	   2.121542871214	  -1.058435373677	   1.129012965629
10    1    0   	  -0.520428576854	  -0.208877824278	  -0.199805805868
11    1    0   	  -0.129257778536	  -0.034891806774	   1.480207673222
12    1    0   	   1.522849379224	   1.729943522845	   1.005149552403
13    6    0   	   4.776508887444	  -0.239765989771	   0.164476015833
14    1    0   	   5.027497722349	  -0.894107893805	   1.000329478424
15    6    0   	   4.441559158066	  -0.953649065286	  -1.108351120303
16    1    0   	   4.209956295184	  -0.271423158483	  -1.929407129528
17    1    0   	   5.299172970262	  -1.555363546450	  -1.433044983296
18    6    0   	   3.274352692914	  -2.038173690861	  -0.967512138772
19    1    0   	   3.475528519047	  -2.615591136318	  -0.060580416799
20    1    0   	   3.341090326682	  -2.689071386956	  -1.845208655835
21    6    0   	   1.280080272957	  -1.086001126336	  -2.197721170251
22    1    0   	   0.728375983275	  -0.145539085096	  -2.182406719416
23    1    0   	   1.962485572041	  -1.122578738861	  -3.048145365636
24    1    0   	   0.524808325008	  -1.872548015762	  -2.357240269073
25    6    0   	  -1.982319307294	  -2.633773755901	   0.791119647711
26    6    0   	  -2.151056700001	  -2.610989468692	   2.287810592838
27    1    0   	  -2.746970706477	  -3.476922389465	   2.602759386137
28    1    0   	  -1.209420610067	  -2.645566343045	   2.838153794642
29    1    0   	  -2.702388983013	  -1.723132179057	   2.613589962662
30    6    0   	  -0.356501009196	   2.430891301017	   0.188594429213
31    6    0   	  -1.387148997581	   2.208857468138	  -0.647146009498
32    6    0   	  -0.260374070814	   3.586882874363	   1.152238585701
33    1    0   	   0.643331235750	   4.179302542409	   0.957510539304
34    1    0   	  -1.117249115662	   4.260269512825	   1.097429496501
35    1    0   	  -0.180878134181	   3.227796629182	   2.187194526605
36    6    0   	  -3.256683131323	  -2.684330909016	  -0.028092150184
37    1    0   	  -3.706219324907	  -3.681666343391	   0.087717761190
38    1    0   	  -3.003163511825	  -2.576544392193	  -1.088314264896
39    6    0   	  -4.357966834029	  -1.646648285053	   0.342029997962
40    1    0   	  -5.156500223006	  -1.762346070073	  -0.396857376396
41    1    0   	  -4.801850474354	  -1.941683390114	   1.301596474309
42    6    0   	  -2.691248583842	   2.948841517221	  -0.762060865520
43    1    0   	  -2.607198109260	   3.972956012529	  -0.386268037222
44    1    0   	  -2.970164946111	   3.032752339214	  -1.819697459345
45    6    0   	  -3.940414312857	  -0.198605370461	   0.457988965962
46    1    0   	  -1.329349656561	   1.330380892276	  -1.291094196464
47    6    0   	  -4.180872803929	   0.822891843078	  -0.386871761327
48    1    0   	  -3.448740706940	   0.061238054792	   1.396139028394
49    6    0   	  -3.835300549195	   2.245261792805	   0.026001784995
50    1    0   	  -3.570522645147	   2.256101501723	   1.088891352599
51    1    0   	  -4.737917154164	   2.863513318628	  -0.080506911143
52    6    0   	  -4.855607560698	   0.678080884596	  -1.730111763916
53    1    0   	  -5.090664733222	  -0.357924721669	  -1.982418259543
54    1    0   	  -5.790047807088	   1.253051243945	  -1.757626725849
55    1    0   	  -4.223921859476	   1.077701859729	  -2.533474669404
56    6    0   	   4.891871763638	   1.089795240606	   0.358213726730
57    1    0   	   1.376506381289	   1.492422664632	  -0.721741421459
58    6    0   	   5.344093422607	   1.630084804084	   1.692713016483
59    1    0   	   6.274164294640	   2.201228561696	   1.581939338694
60    1    0   	   4.601497186156	   2.324734557074	   2.105396031886
61    1    0   	   5.518407546539	   0.835886520728	   2.423251085864
62    6    0   	   4.645620027432	   2.143660341860	  -0.692139099232
63    1    0   	   3.953710309681	   2.905953084011	  -0.314596556527
64    1    0   	   5.581755522168	   2.666294972745	  -0.925524769943
65    1    0   	   4.243848634439	   1.754578915606	  -1.629872011391
66    1    0   	  -0.826182665848	  -2.783900038175	  -0.930958334203
---------------------------------------------------------------------
SCF Done:  E(scf) =  -977.111069731689     A.U.


IRC-IRC-IRC-IRC-IRC-IRC-IRC-IRC-IRC-IRC-IRC-IRC-IRC-IRC-IRC-IRC-IRC-IRC
Pt  58  Step number   1 out of a maximum of  2608
NET REACTION COORDINATE UP TO THIS POINT =    58.00000
IRC-IRC-IRC-IRC-IRC-IRC-IRC-IRC-IRC-IRC-IRC-IRC-IRC-IRC-IRC-IRC-IRC-IRC
                         Input orientation:
---------------------------------------------------------------------
Center     Atomic      Atomic             Coordinates (Angstroms)
Number     Number       Type             X           Y           Z
---------------------------------------------------------------------
1     6    0   	  -0.789396923471	  -2.679376771974	   0.152460991017
2     6    0   	   0.566109606607	  -2.572528249871	   0.750238696706
3     6    0   	   1.958441588403	  -1.385586363549	  -0.913648121588
4     6    0   	   1.333197139716	  -1.125430390568	   0.370707473790
5     6    0   	   0.304296082251	   0.007330757190	   0.475809875771
6     6    0   	   0.812130729273	   1.441466448696	   0.230724396439
7     1    0   	   0.544083946529	  -2.536689603142	   1.840050840970
8     1    0   	   1.226804128938	  -3.393187009518	   0.458472543966
9     1    0   	   2.118835752105	  -1.060047028163	   1.132647231555
10    1    0   	  -0.517695062269	  -0.209369374971	  -0.206194228567
11    1    0   	  -0.138607796434	  -0.041553280495	   1.476746478780
12    1    0   	   1.515276871112	   1.724640094183	   1.022102712808
13    6    0   	   4.777159520303	  -0.238691334019	   0.163315912285
14    1    0   	   5.028093363599	  -0.890096130572	   1.001405474027
15    6    0   	   4.442912345306	  -0.956909014059	  -1.107289263348
16    1    0   	   4.212682823760	  -0.277613172651	  -1.931065109288
17    1    0   	   5.300361911156	  -1.560507662968	  -1.428799457136
18    6    0   	   3.274558403901	  -2.039567517290	  -0.963618463556
19    1    0   	   3.475173855302	  -2.615588353197	  -0.055678747150
20    1    0   	   3.340053125421	  -2.692249141600	  -1.840151705100
21    6    0   	   1.283353130986	  -1.081734173704	  -2.195030737415
22    1    0   	   0.730027483750	  -0.137944991820	  -2.177200838515
23    1    0   	   1.968881674316	  -1.118873000911	  -3.046200500058
24    1    0   	   0.524280185359	  -1.871505818803	  -2.355542788670
25    6    0   	  -1.983066786373	  -2.633983425778	   0.790032415441
26    6    0   	  -2.152629041997	  -2.609141714673	   2.286579778004
27    1    0   	  -2.751046707888	  -3.473100688451	   2.602084478071
28    1    0   	  -1.211475147933	  -2.645452362902	   2.837588142933
29    1    0   	  -2.701911234530	  -1.719495054021	   2.610903529709
30    6    0   	  -0.356734731720	   2.429882370775	   0.194168891093
31    6    0   	  -1.385722516309	   2.208291605297	  -0.643724985672
32    6    0   	  -0.262302385793	   3.586106984516	   1.157730362125
33    1    0   	   0.644125490169	   4.175747707483	   0.967884005017
34    1    0   	  -1.116824708907	   4.261977246772	   1.098278840240
35    1    0   	  -0.189488230090	   3.227132594391	   2.193167744004
36    6    0   	  -3.257038339509	  -2.684179282348	  -0.029789155903
37    1    0   	  -3.706934729625	  -3.681376559284	   0.085856902585
38    1    0   	  -3.002920631867	  -2.576642758770	  -1.089898440070
39    6    0   	  -4.358370542099	  -1.646214100461	   0.339549316860
40    1    0   	  -5.156090431117	  -1.761503380365	  -0.400288555078
41    1    0   	  -4.803410850824	  -1.941436187486	   1.298501225869
42    6    0   	  -2.689199305352	   2.948946850514	  -0.761191764139
43    1    0   	  -2.605442482279	   3.973011007833	  -0.385207689462
44    1    0   	  -2.966074700802	   3.032943797925	  -1.819335137080
45    6    0   	  -3.940821471440	  -0.198215365147	   0.456348892420
46    1    0   	  -1.327535849117	   1.329513535069	  -1.287120829300
47    6    0   	  -4.180242328535	   0.823486477133	  -0.388557185725
48    1    0   	  -3.450342917241	   0.061476720722	   1.395140160534
49    6    0   	  -3.834964328204	   2.245787393106	   0.024846231721
50    1    0   	  -3.572174477825	   2.256684628050	   1.088209976443
51    1    0   	  -4.737132829100	   2.864356635483	  -0.083467531249
52    6    0   	  -4.853288941928	   0.679071271290	  -1.732674894254
53    1    0   	  -5.087507472628	  -0.356876753470	  -1.985967831962
54    1    0   	  -5.787909832679	   1.253687885008	  -1.761134152983
55    1    0   	  -4.220727759279	   1.079461675169	  -2.534981042338
56    6    0   	   4.891697701970	   1.091476397746	   0.352741417247
57    1    0   	   1.383726997597	   1.495081712916	  -0.706562971759
58    6    0   	   5.343170260524	   1.636734582903	   1.685381836221
59    1    0   	   6.273145090972	   2.207662432035	   1.572609162421
60    1    0   	   4.600298226716	   2.333006311181	   2.094743428885
61    1    0   	   5.517260780296	   0.845537064532	   2.419067638707
62    6    0   	   4.645127046011	   2.141556563116	  -0.701285143119
63    1    0   	   3.951386568200	   2.903942378112	  -0.327455591628
64    1    0   	   5.580639912508	   2.664950703413	  -0.935454117839
65    1    0   	   4.245326186999	   1.748666693936	  -1.638256392015
66    1    0   	  -0.826161094048	  -2.787832308700	  -0.931251874823
---------------------------------------------------------------------
SCF Done:  E(scf) =  -977.111054895197     A.U.


IRC-IRC-IRC-IRC-IRC-IRC-IRC-IRC-IRC-IRC-IRC-IRC-IRC-IRC-IRC-IRC-IRC-IRC
Pt  59  Step number   1 out of a maximum of  2608
NET REACTION COORDINATE UP TO THIS POINT =    59.00000
IRC-IRC-IRC-IRC-IRC-IRC-IRC-IRC-IRC-IRC-IRC-IRC-IRC-IRC-IRC-IRC-IRC-IRC
                         Input orientation:
---------------------------------------------------------------------
Center     Atomic      Atomic             Coordinates (Angstroms)
Number     Number       Type             X           Y           Z
---------------------------------------------------------------------
1     6    0   	  -0.789694490666	  -2.681495181905	   0.152051448967
2     6    0   	   0.565477265503	  -2.574511641472	   0.750432667175
3     6    0   	   1.959427175771	  -1.387084007824	  -0.911457197890
4     6    0   	   1.332769283634	  -1.126871957441	   0.372200708860
5     6    0   	   0.303420004613	   0.005536707852	   0.475819328272
6     6    0   	   0.811879064471	   1.440652722318	   0.237402168233
7     1    0   	   0.542832726028	  -2.538906940582	   1.840235594765
8     1    0   	   1.226399292201	  -3.395002257119	   0.458837762434
9     1    0   	   2.117250951254	  -1.061454174641	   1.135307058960
10    1    0   	  -0.515465340644	  -0.209354425057	  -0.210510111328
11    1    0   	  -0.143995329492	  -0.046086801162	   1.474627274546
12    1    0   	   1.511122402942	   1.721537602332	   1.033128245677
13    6    0   	   4.777512243051	  -0.237431505427	   0.161991603568
14    1    0   	   5.028527046100	  -0.886903881285	   1.001588581184
15    6    0   	   4.443445402642	  -0.958723480425	  -1.106980070498
16    1    0   	   4.212886360914	  -0.281558812365	  -1.932447516863
17    1    0   	   5.300927797390	  -1.563016272246	  -1.427126624244
18    6    0   	   3.275281267565	  -2.041403131939	  -0.960062872743
19    1    0   	   3.476388744514	  -2.615039138712	  -0.050745206919
20    1    0   	   3.340452828461	  -2.696185726858	  -1.835027453535
21    6    0   	   1.285395425602	  -1.079207555473	  -2.192379991472
22    1    0   	   0.769603971496	  -0.115961505259	  -2.181752512948
23    1    0   	   1.959777912455	  -1.150372379672	  -3.048022871799
24    1    0   	   0.493896988283	  -1.835595806463	  -2.334793173481
25    6    0   	  -1.983728159086	  -2.634148860984	   0.789014569459
26    6    0   	  -2.153899200864	  -2.607815770654	   2.285453890368
27    1    0   	  -2.753208579670	  -3.471046693385	   2.601305426012
28    1    0   	  -1.213019949672	  -2.644576236408	   2.836895159082
29    1    0   	  -2.702584862348	  -1.717485637733	   2.608893293170
30    6    0   	  -0.357027958826	   2.429090398388	   0.198638603711
31    6    0   	  -1.384689852179	   2.207933837337	  -0.640983370106
32    6    0   	  -0.263667788099	   3.585451030478	   1.162152423909
33    1    0   	   0.643530325233	   4.174465409034	   0.973862898330
34    1    0   	  -1.117639680431	   4.261884058321	   1.100926095224
35    1    0   	  -0.192999321387	   3.226632197833	   2.197816982481
36    6    0   	  -3.257388491512	  -2.684170377283	  -0.031280917668
37    1    0   	  -3.707555074120	  -3.681246302222	   0.084399897905
38    1    0   	  -3.002857798129	  -2.576910295057	  -1.091314864576
39    6    0   	  -4.358697181288	  -1.645931377591	   0.337505079738
40    1    0   	  -5.155987483729	  -1.761016327715	  -0.402828334595
41    1    0   	  -4.804366853604	  -1.941214546650	   1.296148079055
42    6    0   	  -2.687764895062	   2.949059837451	  -0.760401938311
43    1    0   	  -2.604329454556	   3.973088282476	  -0.384254011194
44    1    0   	  -2.963051763634	   3.033165302522	  -1.818960937146
45    6    0   	  -3.941111020129	  -0.197964557689	   0.454804986356
46    1    0   	  -1.325913000404	   1.329243396974	  -1.284382627769
47    6    0   	  -4.179855775493	   0.823920355576	  -0.390075094380
48    1    0   	  -3.451416741470	   0.061596631614	   1.394038617504
49    6    0   	  -3.834865704293	   2.246134775609	   0.023914120891
50    1    0   	  -3.573591764193	   2.256899005827	   1.087659176381
51    1    0   	  -4.736754288162	   2.864895196680	  -0.085645499615
52    6    0   	  -4.851830777137	   0.679788233444	  -1.734757794475
53    1    0   	  -5.085641326222	  -0.356133540404	  -1.988557531541
54    1    0   	  -5.786556807705	   1.254209093945	  -1.763739203387
55    1    0   	  -4.218737446619	   1.080581650890	  -2.536443566457
56    6    0   	   4.891521341427	   1.093216046908	   0.348528210162
57    1    0   	   1.388151166325	   1.498022724552	  -0.696786844893
58    6    0   	   5.342582897455	   1.641534830484	   1.680105591191
59    1    0   	   6.272378813998	   2.212553953642	   1.566303943870
60    1    0   	   4.599376045897	   2.338410064162	   2.087874122475
61    1    0   	   5.516827537196	   0.851940516347	   2.415530531431
62    6    0   	   4.644636769012	   2.140956862147	  -0.707797362336
63    1    0   	   3.949990104352	   2.903506836620	  -0.335895598518
64    1    0   	   5.579819488710	   2.664728108443	  -0.942433250778
65    1    0   	   4.245799750465	   1.745781740494	  -1.644253193046
66    1    0   	  -0.826159197319	  -2.792960950157	  -0.931355923349
---------------------------------------------------------------------
SCF Done:  E(scf) =  -977.111049975420     A.U.


IRC-IRC-IRC-IRC-IRC-IRC-IRC-IRC-IRC-IRC-IRC-IRC-IRC-IRC-IRC-IRC-IRC-IRC
Pt  60  Step number   1 out of a maximum of  2608
NET REACTION COORDINATE UP TO THIS POINT =    60.00000
IRC-IRC-IRC-IRC-IRC-IRC-IRC-IRC-IRC-IRC-IRC-IRC-IRC-IRC-IRC-IRC-IRC-IRC
                         Input orientation:
---------------------------------------------------------------------
Center     Atomic      Atomic             Coordinates (Angstroms)
Number     Number       Type             X           Y           Z
---------------------------------------------------------------------
1     6    0   	  -0.790234864055	  -2.683755376305	   0.151385314045
2     6    0   	   0.564480458467	  -2.577238444706	   0.750660719299
3     6    0   	   1.960479258160	  -1.387940892884	  -0.908148127305
4     6    0   	   1.331981727947	  -1.128719497741	   0.374743792379
5     6    0   	   0.302058034554	   0.003146383518	   0.477256990490
6     6    0   	   0.811396703578	   1.439120316633	   0.246013327615
7     1    0   	   0.541152278181	  -2.542689626716	   1.840468909467
8     1    0   	   1.225677334536	  -3.397310719218	   0.458624875560
9     1    0   	   2.115093075659	  -1.063774533964	   1.139270141115
10    1    0   	  -0.513562052411	  -0.209787705547	  -0.213532368806
11    1    0   	  -0.150040451978	  -0.051573508882	   1.473754610238
12    1    0   	   1.506318628926	   1.717382625279	   1.046446398108
13    6    0   	   4.778036768240	  -0.235711581700	   0.160541133659
14    1    0   	   5.029025691230	  -0.882225144394	   1.002417955376
15    6    0   	   4.444501002234	  -0.961487691825	  -1.106060346786
16    1    0   	   4.214449960676	  -0.287278884449	  -1.934071775250
17    1    0   	   5.301977289379	  -1.567150403536	  -1.423599302690
18    6    0   	   3.275910607108	  -2.043134745826	  -0.955631003598
19    1    0   	   3.477121766165	  -2.614764333735	  -0.045089087516
20    1    0   	   3.340166311152	  -2.699991083065	  -1.829143142340
21    6    0   	   1.288084067908	  -1.076678500471	  -2.189070175804
22    1    0   	   0.789063329419	  -0.103746703594	  -2.180835070701
23    1    0   	   1.958490951276	  -1.163054071839	  -3.046670005945
24    1    0   	   0.480906780447	  -1.818439642899	  -2.324212803960
25    6    0   	  -1.984691565941	  -2.634376933993	   0.787559339365
26    6    0   	  -2.155733884991	  -2.606439353697	   2.283860080005
27    1    0   	  -2.756671896922	  -3.468415827270	   2.600032238059
28    1    0   	  -1.215277981215	  -2.644277608896	   2.835934093743
29    1    0   	  -2.703184708469	  -1.714959304233	   2.606196702727
30    6    0   	  -0.357217675408	   2.427880615328	   0.204582169953
31    6    0   	  -1.383178944977	   2.207499089140	  -0.637311332968
32    6    0   	  -0.265332904299	   3.584153113812	   1.168360034799
33    1    0   	   0.643266485956	   4.171914871458	   0.982976086439
34    1    0   	  -1.118170878793	   4.261755629664	   1.104428006616
35    1    0   	  -0.198434465599	   3.225240529367	   2.204241420442
36    6    0   	  -3.257894846464	  -2.683920033922	  -0.033452360529
37    1    0   	  -3.708444745147	  -3.680853874902	   0.082007699783
38    1    0   	  -3.002709279315	  -2.576824588598	  -1.093343002141
39    6    0   	  -4.359181845279	  -1.645379848987	   0.334656176546
40    1    0   	  -5.155838555614	  -1.760076302023	  -0.406421669635
41    1    0   	  -4.805784301543	  -1.940820551006	   1.292813133594
42    6    0   	  -2.685634440747	   2.949332328826	  -0.759222031226
43    1    0   	  -2.602513294274	   3.973265460462	  -0.382749099128
44    1    0   	  -2.958809221335	   3.033698680309	  -1.818305300228
45    6    0   	  -3.941501575791	  -0.197488180986	   0.452767968647
46    1    0   	  -1.323696258547	   1.328950215331	  -1.280775952493
47    6    0   	  -4.179208317603	   0.824684864986	  -0.392055512214
48    1    0   	  -3.452923707094	   0.061820565844	   1.392642114307
49    6    0   	  -3.834537569686	   2.246744487927	   0.022771832695
50    1    0   	  -3.575294845495	   2.257289692069	   1.087012203328
51    1    0   	  -4.735990293942	   2.865833891349	  -0.088444994596
52    6    0   	  -4.849626472612	   0.681048500395	  -1.737560955825
53    1    0   	  -5.082859641450	  -0.354806435306	  -1.992172568485
54    1    0   	  -5.784471171498	   1.255234987818	  -1.767307612620
55    1    0   	  -4.215729943128	   1.082446844325	  -2.538309723947
56    6    0   	   4.891240733988	   1.095585676407	   0.342649515794
57    1    0   	   1.392847508792	   1.499921036896	  -0.684719102735
58    6    0   	   5.341479856346	   1.648669767183	   1.672532162585
59    1    0   	   6.271067982220	   2.219713599160	   1.557158758190
60    1    0   	   4.597779946855	   2.346617197788	   2.077552185501
61    1    0   	   5.515751514236	   0.861696938578	   2.410742250131
62    6    0   	   4.644043582180	   2.139657251262	  -0.717241807504
63    1    0   	   3.948007348499	   2.902472289102	  -0.348479070986
64    1    0   	   5.578746924057	   2.663930551090	  -0.952647892057
65    1    0   	   4.246704278834	   1.740973763805	  -1.652849994216
66    1    0   	  -0.826136994345	  -2.797164214145	  -0.931846014693
---------------------------------------------------------------------
SCF Done:  E(scf) =  -977.111037268925     A.U.


IRC-IRC-IRC-IRC-IRC-IRC-IRC-IRC-IRC-IRC-IRC-IRC-IRC-IRC-IRC-IRC-IRC-IRC
Pt  61  Step number   1 out of a maximum of  2608
NET REACTION COORDINATE UP TO THIS POINT =    61.00000
IRC-IRC-IRC-IRC-IRC-IRC-IRC-IRC-IRC-IRC-IRC-IRC-IRC-IRC-IRC-IRC-IRC-IRC
                         Input orientation:
---------------------------------------------------------------------
Center     Atomic      Atomic             Coordinates (Angstroms)
Number     Number       Type             X           Y           Z
---------------------------------------------------------------------
1     6    0   	  -0.790740240278	  -2.686038345061	   0.150772598025
2     6    0   	   0.563520533155	  -2.579826441428	   0.750938822701
3     6    0   	   1.961510857383	  -1.389250855750	  -0.905008105962
4     6    0   	   1.331272105950	  -1.130527112265	   0.377049726531
5     6    0   	   0.300847885932	   0.000902271692	   0.478198301978
6     6    0   	   0.810992417347	   1.437706333322	   0.254028639436
7     1    0   	   0.539488358215	  -2.546043875830	   1.840743867885
8     1    0   	   1.224986744582	  -3.399569896918	   0.458710429475
9     1    0   	   2.112998318949	  -1.065886778334	   1.142983800879
10    1    0   	  -0.511479021330	  -0.210013316508	  -0.217016885965
11    1    0   	  -0.155946070783	  -0.056767014075	   1.472336814387
12    1    0   	   1.501697274934	   1.713359308918	   1.058988672166
13    6    0   	   4.778336444456	  -0.233931791870	   0.159054021939
14    1    0   	   5.029312891032	  -0.877711186158	   1.003017214251
15    6    0   	   4.445256367290	  -0.963885094096	  -1.105301525864
16    1    0   	   4.215236331608	  -0.292488620461	  -1.935591196308
17    1    0   	   5.302832959289	  -1.570530520208	  -1.420660960602
18    6    0   	   3.276658383753	  -2.044990977558	  -0.951220056094
19    1    0   	   3.478204078000	  -2.614294122648	  -0.039317171989
20    1    0   	   3.340245613176	  -2.704088776103	  -1.823098125597
21    6    0   	   1.290657248964	  -1.074440564747	  -2.185817243939
22    1    0   	   0.815866545600	  -0.089218955049	  -2.181658203827
23    1    0   	   1.954316728720	  -1.181833022470	  -3.045926115269
24    1    0   	   0.463093432411	  -1.794547520337	  -2.310561604891
25    6    0   	  -1.985607624465	  -2.634650053401	   0.786186025145
26    6    0   	  -2.157473735352	  -2.605091525781	   2.282351203692
27    1    0   	  -2.759688458429	  -3.466048482892	   2.598872444142
28    1    0   	  -1.217409965420	  -2.643646327677	   2.835028446298
29    1    0   	  -2.704022553564	  -1.712680492815	   2.603600458953
30    6    0   	  -0.357369324876	   2.426758186936	   0.210130283614
31    6    0   	  -1.381689573647	   2.207191448513	  -0.633949845523
32    6    0   	  -0.266864920300	   3.582873425372	   1.174242198864
33    1    0   	   0.642935292869	   4.169586352904	   0.991475252722
34    1    0   	  -1.118717960559	   4.261476436472	   1.107953432706
35    1    0   	  -0.203286565731	   3.223811106247	   2.210274580737
36    6    0   	  -3.258381611970	  -2.683823688836	  -0.035487686940
37    1    0   	  -3.709334965356	  -3.680587700711	   0.079901190207
38    1    0   	  -3.002586014531	  -2.577030383277	  -1.095257925034
39    6    0   	  -4.359593025555	  -1.644895536815	   0.331878843875
40    1    0   	  -5.155619552057	  -1.759186983858	  -0.409937789787
41    1    0   	  -4.807147063039	  -1.940431263035	   1.289560741743
42    6    0   	  -2.683597853752	   2.949652574628	  -0.758064839497
43    1    0   	  -2.600790608561	   3.973480766812	  -0.381240836057
44    1    0   	  -2.954886883383	   3.034309268177	  -1.817606595618
45    6    0   	  -3.941729581462	  -0.197102299810	   0.450773104350
46    1    0   	  -1.321492655790	   1.328884913562	  -1.277614177413
47    6    0   	  -4.178507120121	   0.825413239940	  -0.393896945790
48    1    0   	  -3.454103884630	   0.061893490068	   1.391218103954
49    6    0   	  -3.834082202041	   2.247289022162	   0.021811740638
50    1    0   	  -3.576611099329	   2.257521166387	   1.086481707946
51    1    0   	  -4.735148814541	   2.866683804091	  -0.090775187520
52    6    0   	  -4.847607151914	   0.682365949822	  -1.740112845857
53    1    0   	  -5.080390222977	  -0.353397284589	  -1.995517206630
54    1    0   	  -5.782533827679	   1.256387234443	  -1.770439226422
55    1    0   	  -4.213020455638	   1.084340249956	  -2.540024003529
56    6    0   	   4.890819580940	   1.097944411280	   0.337105971879
57    1    0   	   1.397398476294	   1.502011799251	  -0.673291540872
58    6    0   	   5.340307974429	   1.655331348397	   1.665444856825
59    1    0   	   6.269710266958	   2.226393344251	   1.548680505055
60    1    0   	   4.596152545791	   2.354214250593	   2.067996037927
61    1    0   	   5.514599552798	   0.870722599837	   2.406151587770
62    6    0   	   4.643378490322	   2.138670505863	  -0.726014187543
63    1    0   	   3.946088831706	   2.901721239314	  -0.360105184552
64    1    0   	   5.577661729136	   2.663390308446	  -0.962073251895
65    1    0   	   4.247440602670	   1.736806652004	  -1.660854217551
66    1    0   	  -0.826080838700	  -2.801684599201	  -0.932240323803
---------------------------------------------------------------------
SCF Done:  E(scf) =  -977.111026031306     A.U.


IRC-IRC-IRC-IRC-IRC-IRC-IRC-IRC-IRC-IRC-IRC-IRC-IRC-IRC-IRC-IRC-IRC-IRC
Pt  62  Step number   1 out of a maximum of  2608
NET REACTION COORDINATE UP TO THIS POINT =    62.00000
IRC-IRC-IRC-IRC-IRC-IRC-IRC-IRC-IRC-IRC-IRC-IRC-IRC-IRC-IRC-IRC-IRC-IRC
                         Input orientation:
---------------------------------------------------------------------
Center     Atomic      Atomic             Coordinates (Angstroms)
Number     Number       Type             X           Y           Z
---------------------------------------------------------------------
1     6    0   	  -0.791258043752	  -2.688203282815	   0.150238706253
2     6    0   	   0.562546484203	  -2.582204816670	   0.751318277793
3     6    0   	   1.962466138305	  -1.390991680437	  -0.902038813075
4     6    0   	   1.330690243630	  -1.132278392988	   0.379187715917
5     6    0   	   0.299910915326	  -0.001125120683	   0.478875680341
6     6    0   	   0.810818617320	   1.436431436080	   0.261042736012
7     1    0   	   0.537767261181	  -2.548899748033	   1.841113014370
8     1    0   	   1.224242158263	  -3.401743451608	   0.459153485463
9     1    0   	   2.111080901663	  -1.067845909465	   1.146452736475
10    1    0   	  -0.509412374562	  -0.210130788122	  -0.220391957653
11    1    0   	  -0.161197172791	  -0.061356885748	   1.470860789064
12    1    0   	   1.497848108859	   1.709714192596	   1.069990053707
13    6    0   	   4.778355022524	  -0.232013350567	   0.157646503261
14    1    0   	   5.029264351393	  -0.873273938041	   1.003558684588
15    6    0   	   4.445722672690	  -0.965859723661	  -1.104629180562
16    1    0   	   4.215339511369	  -0.297098433375	  -1.936970739723
17    1    0   	   5.303523689993	  -1.573162469134	  -1.418197798936
18    6    0   	   3.277498386943	  -2.046898949296	  -0.946898090717
19    1    0   	   3.479592559196	  -2.613660819100	  -0.033559474148
20    1    0   	   3.340699452370	  -2.708302437844	  -1.817035795657
21    6    0   	   1.292866752316	  -1.072834167838	  -2.182641442557
22    1    0   	   0.847994898434	  -0.073205618335	  -2.184236028656
23    1    0   	   1.947427586523	  -1.206145902106	  -3.045675874989
24    1    0   	   0.441073451514	  -1.765805566430	  -2.294142286644
25    6    0   	  -1.986561416147	  -2.635029631991	   0.784867593527
26    6    0   	  -2.159292053645	  -2.604207734636	   2.280895601627
27    1    0   	  -2.762473559039	  -3.464448456746	   2.597558086817
28    1    0   	  -1.219607817590	  -2.643280889016	   2.834182927581
29    1    0   	  -2.705271060442	  -1.711138302099	   2.601253254430
30    6    0   	  -0.357363519001	   2.425711610913	   0.215124188271
31    6    0   	  -1.380171053712	   2.207040435007	  -0.631001169645
32    6    0   	  -0.268131361603	   3.581452376701	   1.179806495489
33    1    0   	   0.642585414227	   4.167533470605	   0.999257771281
34    1    0   	  -1.119326986330	   4.260729195675	   1.111748486208
35    1    0   	  -0.207134132893	   3.222025303709	   2.215918496572
36    6    0   	  -3.258884387672	  -2.683802219754	  -0.037503457117
37    1    0   	  -3.710268190942	  -3.680388253013	   0.077763626093
38    1    0   	  -3.002462818308	  -2.577254357479	  -1.097142837483
39    6    0   	  -4.359984372470	  -1.644461758317	   0.329172813791
40    1    0   	  -5.155398969220	  -1.758285548561	  -0.413371202864
41    1    0   	  -4.808483028864	  -1.940115297443	   1.286378143932
42    6    0   	  -2.681633247487	   2.950039513709	  -0.756883205987
43    1    0   	  -2.599096331911	   3.973734587662	  -0.379641023877
44    1    0   	  -2.951342231852	   3.035075566107	  -1.816798188057
45    6    0   	  -3.941849126143	  -0.196799136212	   0.448905831239
46    1    0   	  -1.319243134556	   1.329141080435	  -1.275086287976
47    6    0   	  -4.177722510426	   0.826126196472	  -0.395522773250
48    1    0   	  -3.455057764959	   0.061785406867	   1.389890144106
49    6    0   	  -3.833445042825	   2.247773511674	   0.021131144909
50    1    0   	  -3.577441119264	   2.257572711785	   1.086159432914
51    1    0   	  -4.734180530571	   2.867458126248	  -0.092490062613
52    6    0   	  -4.845658028400	   0.683782447796	  -1.742386051923
53    1    0   	  -5.078175087604	  -0.351853267638	  -1.998562696259
54    1    0   	  -5.780587291151	   1.257772808838	  -1.773187519166
55    1    0   	  -4.210404251713	   1.086240157731	  -2.541524671800
56    6    0   	   4.890253451002	   1.100407118328	   0.331949750394
57    1    0   	   1.401523706385	   1.504014453506	  -0.663285300640
58    6    0   	   5.339028417184	   1.661720715369	   1.658909329197
59    1    0   	   6.268251237820	   2.232817552423	   1.540884510894
60    1    0   	   4.594434043453	   2.361436195858	   2.059267025466
61    1    0   	   5.513349299081	   0.879224592072	   2.401885541392
62    6    0   	   4.642733250771	   2.138081236752	  -0.734164116424
63    1    0   	   3.944428217910	   2.901487854758	  -0.370859211346
64    1    0   	   5.576727789308	   2.663042616054	  -0.970805632740
65    1    0   	   4.247999754291	   1.733342642069	  -1.668308540181
66    1    0   	  -0.826024882922	  -2.806158007670	  -0.932538668017
---------------------------------------------------------------------
SCF Done:  E(scf) =  -977.111015226784     A.U.


IRC-IRC-IRC-IRC-IRC-IRC-IRC-IRC-IRC-IRC-IRC-IRC-IRC-IRC-IRC-IRC-IRC-IRC
Pt  63  Step number   1 out of a maximum of  2608
NET REACTION COORDINATE UP TO THIS POINT =    63.00000
IRC-IRC-IRC-IRC-IRC-IRC-IRC-IRC-IRC-IRC-IRC-IRC-IRC-IRC-IRC-IRC-IRC-IRC
                         Input orientation:
---------------------------------------------------------------------
Center     Atomic      Atomic             Coordinates (Angstroms)
Number     Number       Type             X           Y           Z
---------------------------------------------------------------------
1     6    0   	  -0.792026727338	  -2.690105114727	   0.149658449941
2     6    0   	   0.561253222042	  -2.584821320773	   0.751909589126
3     6    0   	   1.963154885114	  -1.392704151050	  -0.898550853865
4     6    0   	   1.330002839289	  -1.134327424785	   0.381980811088
5     6    0   	   0.299096719723	  -0.003267773807	   0.480974532782
6     6    0   	   0.810809072515	   1.434737361235	   0.267907976622
7     1    0   	   0.535657348303	  -2.552381283486	   1.841710027452
8     1    0   	   1.223091037976	  -3.404150760444	   0.459570968953
9     1    0   	   2.109252640557	  -1.070525242878	   1.150430702397
10    1    0   	  -0.508191668493	  -0.210617999792	  -0.221128145904
11    1    0   	  -0.164962551399	  -0.065498324679	   1.471458420248
12    1    0   	   1.495228825167	   1.706108241896	   1.079712386179
13    6    0   	   4.778196906992	  -0.229514996472	   0.156427348629
14    1    0   	   5.028832219271	  -0.867666839465	   1.004745716571
15    6    0   	   4.446390295539	  -0.968026985074	  -1.103357778959
16    1    0   	   4.216369667713	  -0.302388324808	  -1.938238421654
17    1    0   	   5.304404045725	  -1.576320192522	  -1.414175557233
18    6    0   	   3.278208757744	  -2.048616016323	  -0.942288685985
19    1    0   	   3.480654130266	  -2.613268156428	  -0.027713156380
20    1    0   	   3.340925333430	  -2.712038561729	  -1.810964645583
21    6    0   	   1.295059155357	  -1.072102943185	  -2.179304036465
22    1    0   	   0.870389839353	  -0.063613118055	  -2.184271792727
23    1    0   	   1.944426633769	  -1.221168244171	  -3.043704664538
24    1    0   	   0.428210704535	  -1.746726928712	  -2.283781727578
25    6    0   	  -1.987842612966	  -2.635587749571	   0.783319252294
26    6    0   	  -2.161725657260	  -2.604114528010	   2.279196897695
27    1    0   	  -2.765970109355	  -3.463683204465	   2.595597546084
28    1    0   	  -1.222541194645	  -2.643929031101	   2.833247222855
29    1    0   	  -2.707115132241	  -1.710467788592	   2.598904724339
30    6    0   	  -0.357038483919	   2.424403730858	   0.220497435113
31    6    0   	  -1.378266180359	   2.206975028819	  -0.627838983929
32    6    0   	  -0.269244643354	   3.579266490616	   1.186367161683
33    1    0   	   0.642628620938	   4.164334252690	   1.008953141750
34    1    0   	  -1.119357146655	   4.259662693434	   1.116408834340
35    1    0   	  -0.211725405017	   3.218965873484	   2.222278365424
36    6    0   	  -3.259529731803	  -2.683625227952	  -0.040055404747
37    1    0   	  -3.711436212394	  -3.680031336921	   0.074708576048
38    1    0   	  -3.002206284949	  -2.577052539309	  -1.099466672972
39    6    0   	  -4.360512948372	  -1.643886786715	   0.325912254374
40    1    0   	  -5.155194548932	  -1.757040834581	  -0.417519882169
41    1    0   	  -4.810152464975	  -1.939781184886	   1.282512441268
42    6    0   	  -2.679235762204	   2.950588113686	  -0.755359179455
43    1    0   	  -2.596892640925	   3.974076847699	  -0.377511739876
44    1    0   	  -2.947335604713	   3.036216252573	  -1.815634574964
45    6    0   	  -3.941969591848	  -0.196425425268	   0.446800069682
46    1    0   	  -1.316502127448	   1.329709205368	  -1.272680523177
47    6    0   	  -4.176687353380	   0.827074366095	  -0.397256940090
48    1    0   	  -3.456117867394	   0.061522716391	   1.388438905012
49    6    0   	  -3.832451781493	   2.248380302177	   0.020626823677
50    1    0   	  -3.577953571103	   2.257525007179	   1.086021729065
51    1    0   	  -4.732791417036	   2.868463226069	  -0.093947585120
52    6    0   	  -4.843283978020	   0.685734677889	  -1.744881957186
53    1    0   	  -5.075577857054	  -0.349711573383	  -2.002043674710
54    1    0   	  -5.778165441536	   1.259773308650	  -1.776178293738
55    1    0   	  -4.207228882485	   1.088765257786	  -2.543086783104
56    6    0   	   4.889497396033	   1.103514023433	   0.326038614040
57    1    0   	   1.404590154883	   1.504513730286	  -0.654255041188
58    6    0   	   5.337293757144	   1.669694877504	   1.651232576320
59    1    0   	   6.266607178118	   2.240366441896	   1.531884550211
60    1    0   	   4.592395181717	   2.370772921233	   2.048471105335
61    1    0   	   5.511094104477	   0.889929449902	   2.397132799429
62    6    0   	   4.642115621464	   2.137308296875	  -0.743825285843
63    1    0   	   3.942479983866	   2.901060614083	  -0.383908308640
64    1    0   	   5.575767468335	   2.662593088257	  -0.981084237464
65    1    0   	   4.249051843747	   1.728978417516	  -1.677061731570
66    1    0   	  -0.825967564287	  -2.809133882239	  -0.933018327986
---------------------------------------------------------------------
SCF Done:  E(scf) =  -977.111005994635     A.U.


IRC-IRC-IRC-IRC-IRC-IRC-IRC-IRC-IRC-IRC-IRC-IRC-IRC-IRC-IRC-IRC-IRC-IRC
Pt  64  Step number   1 out of a maximum of  2608
NET REACTION COORDINATE UP TO THIS POINT =    64.00000
IRC-IRC-IRC-IRC-IRC-IRC-IRC-IRC-IRC-IRC-IRC-IRC-IRC-IRC-IRC-IRC-IRC-IRC
                         Input orientation:
---------------------------------------------------------------------
Center     Atomic      Atomic             Coordinates (Angstroms)
Number     Number       Type             X           Y           Z
---------------------------------------------------------------------
1     6    0   	  -0.792929226333	  -2.691858097493	   0.148988540868
2     6    0   	   0.559735767381	  -2.587374186055	   0.752666527811
3     6    0   	   1.964117835645	  -1.394394119826	  -0.894499062855
4     6    0   	   1.329584621602	  -1.136354100054	   0.385279485389
5     6    0   	   0.298804310407	  -0.005156613562	   0.483335201009
6     6    0   	   0.811231372347	   1.433125101798	   0.273894841877
7     1    0   	   0.533060984953	  -2.555727462151	   1.842455291583
8     1    0   	   1.221694510368	  -3.406593686412	   0.460375538715
9     1    0   	   2.107490956238	  -1.073514422883	   1.155097053077
10    1    0   	  -0.506681046776	  -0.211056139119	  -0.221162586640
11    1    0   	  -0.167822272529	  -0.068725136947	   1.472462396641
12    1    0   	   1.493737611353	   1.703001085300	   1.087734224492
13    6    0   	   4.777849140321	  -0.226860824083	   0.154811834871
14    1    0   	   5.028184229034	  -0.862024044827	   1.005479114565
15    6    0   	   4.446611344028	  -0.969919428378	  -1.102529752044
16    1    0   	   4.215855137317	  -0.307272562132	  -1.939637409648
17    1    0   	   5.305043419427	  -1.578638788745	  -1.411517068756
18    6    0   	   3.279121289549	  -2.050463155216	  -0.937301392759
19    1    0   	   3.482381278431	  -2.612544089507	  -0.021350896170
20    1    0   	   3.341220133658	  -2.716279559689	  -1.804183463205
21    6    0   	   1.296915522838	  -1.071288249849	  -2.175037535323
22    1    0   	   0.891943467226	  -0.054188841994	  -2.183979990618
23    1    0   	   1.939422020748	  -1.237168682862	  -3.041258485423
24    1    0   	   0.415426305781	  -1.727781443324	  -2.270905158151
25    6    0   	  -1.989339432040	  -2.636233703072	   0.781567098179
26    6    0   	  -2.164478293152	  -2.604578675345	   2.277282547769
27    1    0   	  -2.768718125633	  -3.464358114283	   2.593195733052
28    1    0   	  -1.225757103756	  -2.644072200257	   2.832155930147
29    1    0   	  -2.710437629785	  -1.711110396993	   2.596467619847
30    6    0   	  -0.356425886350	   2.423011482458	   0.225548676337
31    6    0   	  -1.376128779142	   2.206917021493	  -0.624941533173
32    6    0   	  -0.270039468629	   3.576726465269	   1.192931454282
33    1    0   	   0.641333184494	   4.162955087644	   1.016464198672
34    1    0   	  -1.120811622063	   4.256370948967	   1.123553747863
35    1    0   	  -0.212389896713	   3.215190947225	   2.228431551939
36    6    0   	  -3.260377045185	  -2.683500534151	  -0.042843194848
37    1    0   	  -3.712842057823	  -3.679724171683	   0.071376063684
38    1    0   	  -3.002184232222	  -2.576848738104	  -1.102034163464
39    6    0   	  -4.361168907627	  -1.643326091115	   0.322566853461
40    1    0   	  -5.155189987679	  -1.755722971656	  -0.421672340380
41    1    0   	  -4.811865089940	  -1.939492124435	   1.278578911249
42    6    0   	  -2.676675369001	   2.951091013329	  -0.753795275133
43    1    0   	  -2.594472864218	   3.974342123593	  -0.375266009384
44    1    0   	  -2.943285241513	   3.037435608029	  -1.814383174668
45    6    0   	  -3.942075649905	  -0.196116804027	   0.444659468060
46    1    0   	  -1.313385255426	   1.330521314247	  -1.270871792429
47    6    0   	  -4.175583532008	   0.828011782235	  -0.398968588926
48    1    0   	  -3.457016963062	   0.061083469719	   1.386908368795
49    6    0   	  -3.831227500447	   2.248912387239	   0.020209137308
50    1    0   	  -3.578130934001	   2.257284997851	   1.085941552477
51    1    0   	  -4.731147204479	   2.869453565943	  -0.095156280355
52    6    0   	  -4.841013090942	   0.687774364699	  -1.747283021372
53    1    0   	  -5.073304808992	  -0.347442913557	  -2.005361282434
54    1    0   	  -5.775770414744	   1.262002686986	  -1.778971004110
55    1    0   	  -4.204197723077	   1.091243584422	  -2.544653861529
56    6    0   	   4.888594250446	   1.106760267915	   0.319967003622
57    1    0   	   1.407189345638	   1.504651306590	  -0.646619662099
58    6    0   	   5.335187275823	   1.677469562506	   1.643668359009
59    1    0   	   6.264068206167	   2.248579074273	   1.523128479207
60    1    0   	   4.589415097711	   2.379067706539	   2.038425733157
61    1    0   	   5.509264635055	   0.900117301860	   2.392069081211
62    6    0   	   4.641585815291	   2.137002595974	  -0.753464034557
63    1    0   	   3.941239391265	   2.901577359435	  -0.396564198405
64    1    0   	   5.575164207547	   2.662052127033	  -0.991513569987
65    1    0   	   4.249600157434	   1.725508204042	  -1.685782772119
66    1    0   	  -0.825953664100	  -2.812038784737	  -0.933583859129
---------------------------------------------------------------------
SCF Done:  E(scf) =  -977.110997176378     A.U.


IRC-IRC-IRC-IRC-IRC-IRC-IRC-IRC-IRC-IRC-IRC-IRC-IRC-IRC-IRC-IRC-IRC-IRC
Pt  65  Step number   1 out of a maximum of  2608
NET REACTION COORDINATE UP TO THIS POINT =    65.00000
IRC-IRC-IRC-IRC-IRC-IRC-IRC-IRC-IRC-IRC-IRC-IRC-IRC-IRC-IRC-IRC-IRC-IRC
                         Input orientation:
---------------------------------------------------------------------
Center     Atomic      Atomic             Coordinates (Angstroms)
Number     Number       Type             X           Y           Z
---------------------------------------------------------------------
1     6    0   	  -0.793557092748	  -2.692539294480	   0.148323849769
2     6    0   	   0.558767193086	  -2.588950372392	   0.752869757922
3     6    0   	   1.964528314812	  -1.395904388351	  -0.892152232634
4     6    0   	   1.329369699011	  -1.137588104551	   0.387170342856
5     6    0   	   0.298678592587	  -0.006280248932	   0.485041933977
6     6    0   	   0.811423331816	   1.432150574589	   0.277091926160
7     1    0   	   0.531609737572	  -2.557965835005	   1.842673669305
8     1    0   	   1.220663675461	  -3.408128971857	   0.460373249949
9     1    0   	   2.106561240263	  -1.075367263955	   1.157723825373
10    1    0   	  -0.506201672539	  -0.211391437956	  -0.220383698819
11    1    0   	  -0.168835064019	  -0.070544745792	   1.473741354393
12    1    0   	   1.493534915018	   1.701375163875	   1.091520549728
13    6    0   	   4.777560412774	  -0.225074439112	   0.154440778242
14    1    0   	   5.027356647193	  -0.858001822183	   1.007002757937
15    6    0   	   4.447335363428	  -0.971537424134	  -1.101241575247
16    1    0   	   4.217213067609	  -0.311075406654	  -1.940312246011
17    1    0   	   5.306043210673	  -1.581092702884	  -1.407956166762
18    6    0   	   3.279771714574	  -2.051652276913	  -0.934151879724
19    1    0   	   3.483109659251	  -2.612391140933	  -0.017404372988
20    1    0   	   3.341778102200	  -2.718757749404	  -1.800048665018
21    6    0   	   1.298213410133	  -1.072029667174	  -2.172995975492
22    1    0   	   0.908852648449	  -0.050885949765	  -2.185510890312
23    1    0   	   1.935800343541	  -1.248575024507	  -3.039252333669
24    1    0   	   0.408599258744	  -1.713574645073	  -2.264767031455
25    6    0   	  -1.990281811461	  -2.636634421492	   0.780316687022
26    6    0   	  -2.166156076945	  -2.605428743945	   2.275959162172
27    1    0   	  -2.771287374153	  -3.464812610797	   2.591240465986
28    1    0   	  -1.227741598816	  -2.645965877631	   2.831289865136
29    1    0   	  -2.711485147808	  -1.711612744212	   2.595251884272
30    6    0   	  -0.356186966503	   2.422141562207	   0.228764359584
31    6    0   	  -1.374967824741	   2.207143298990	  -0.623115228267
32    6    0   	  -0.270776604449	   3.574727699383	   1.197599653197
33    1    0   	   0.640976873618	   4.160975076663	   1.022927773963
34    1    0   	  -1.121319649879	   4.254630372126	   1.127806276680
35    1    0   	  -0.214554332540	   3.212050504020	   2.232807362987
36    6    0   	  -3.260906160417	  -2.683087221452	  -0.044773203276
37    1    0   	  -3.713685229587	  -3.679256666049	   0.068700483271
38    1    0   	  -3.002144060417	  -2.575939490894	  -1.103773860861
39    6    0   	  -4.361608651232	  -1.642835202322	   0.320667211442
40    1    0   	  -5.155371541986	  -1.754733899548	  -0.423932255276
41    1    0   	  -4.812737422356	  -1.939352632074	   1.276377511843
42    6    0   	  -2.675284519305	   2.951665526307	  -0.752535493988
43    1    0   	  -2.593133496483	   3.974719050754	  -0.373448332914
44    1    0   	  -2.941091008634	   3.038603960631	  -1.813281239602
45    6    0   	  -3.942286168859	  -0.195755229332	   0.443618922265
46    1    0   	  -1.311529185517	   1.331550901093	  -1.270073447383
47    6    0   	  -4.174890297804	   0.828747067479	  -0.399810178237
48    1    0   	  -3.457967840638	   0.061000512252	   1.386375227702
49    6    0   	  -3.830602191007	   2.249406999133	   0.020235368110
50    1    0   	  -3.578372791357	   2.257277624337	   1.086180106382
51    1    0   	  -4.730320271949	   2.870159302410	  -0.095596070654
52    6    0   	  -4.839226346635	   0.689122711744	  -1.748731409141
53    1    0   	  -5.071762014571	  -0.345949552571	  -2.007208102369
54    1    0   	  -5.773709680684	   1.263756726827	  -1.781084306636
55    1    0   	  -4.201551095392	   1.092470095176	  -2.545478847415
56    6    0   	   4.887947249956	   1.109042681359	   0.316141465717
57    1    0   	   1.407843080037	   1.504417035515	  -0.643087023298
58    6    0   	   5.333416860893	   1.683322042445	   1.638774729140
59    1    0   	   6.262352780572	   2.254201487910	   1.517546130612
60    1    0   	   4.587237446290	   2.385862642996	   2.031231103652
61    1    0   	   5.507012373938	   0.907830869948	   2.389343131365
62    6    0   	   4.641536247119	   2.136489305996	  -0.760206911767
63    1    0   	   3.940470577194	   2.901679916482	  -0.405856556691
64    1    0   	   5.575118925561	   2.661383967102	  -0.998567490549
65    1    0   	   4.250690178582	   1.722455491791	  -1.691940943429
66    1    0   	  -0.825955347043	  -2.812397597180	  -0.934283514481
---------------------------------------------------------------------
SCF Done:  E(scf) =  -977.110987616952     A.U.


IRC-IRC-IRC-IRC-IRC-IRC-IRC-IRC-IRC-IRC-IRC-IRC-IRC-IRC-IRC-IRC-IRC-IRC
Pt  66  Step number   1 out of a maximum of  2608
NET REACTION COORDINATE UP TO THIS POINT =    66.00000
IRC-IRC-IRC-IRC-IRC-IRC-IRC-IRC-IRC-IRC-IRC-IRC-IRC-IRC-IRC-IRC-IRC-IRC
                         Input orientation:
---------------------------------------------------------------------
Center     Atomic      Atomic             Coordinates (Angstroms)
Number     Number       Type             X           Y           Z
---------------------------------------------------------------------
1     6    0   	  -0.794391867415	  -2.693770973666	   0.147715490063
2     6    0   	   0.557443659058	  -2.591199969534	   0.753313020753
3     6    0   	   1.965531845395	  -1.396086054594	  -0.888711400742
4     6    0   	   1.328500890519	  -1.139314609092	   0.389946276468
5     6    0   	   0.297686079605	  -0.008168240407	   0.487505373967
6     6    0   	   0.811382074098	   1.430350781041	   0.282587744125
7     1    0   	   0.529502957807	  -2.561594505188	   1.843116723162
8     1    0   	   1.219449457922	  -3.410062692988	   0.460198317007
9     1    0   	   2.104575250785	  -1.077980596755	   1.161675894876
10    1    0   	  -0.505905605032	  -0.212311255057	  -0.219718738338
11    1    0   	  -0.171758833897	  -0.073688303517	   1.475200322097
12    1    0   	   1.491870434945	   1.698051513001	   1.098883284611
13    6    0   	   4.777430276687	  -0.222843505887	   0.154020223001
14    1    0   	   5.026435179787	  -0.852180802555	   1.009376058732
15    6    0   	   4.448740005735	  -0.974335856376	  -1.099058729136
16    1    0   	   4.220228051896	  -0.317194807226	  -1.941072705566
17    1    0   	   5.307643309488	  -1.585448444994	  -1.401914871863
18    6    0   	   3.280355391661	  -2.052859998350	  -0.929680760081
19    1    0   	   3.483156425385	  -2.612521668385	  -0.012142680897
20    1    0   	   3.341556447946	  -2.721362609488	  -1.794660703430
21    6    0   	   1.300949099581	  -1.071514615414	  -2.170247239378
22    1    0   	   0.896462209893	  -0.053339834383	  -2.178663029193
23    1    0   	   1.945627767047	  -1.237054433391	  -3.035540284637
24    1    0   	   0.418301917625	  -1.727765677031	  -2.268300469499
25    6    0   	  -1.991607181909	  -2.637188014336	   0.778752692706
26    6    0   	  -2.168733956093	  -2.606311229133	   2.274239336787
27    1    0   	  -2.775071381358	  -3.465148101748	   2.588669299934
28    1    0   	  -1.230874090653	  -2.647993815688	   2.830393111864
29    1    0   	  -2.713458687817	  -1.712041054454	   2.593291889991
30    6    0   	  -0.355707568840	   2.420843869754	   0.233382160485
31    6    0   	  -1.373106945549	   2.207325410629	  -0.620513340089
32    6    0   	  -0.271858856422	   3.571836641993	   1.204220667940
33    1    0   	   0.640919271994	   4.157450456669	   1.033138103496
34    1    0   	  -1.121584351059	   4.252635413487	   1.133320133276
35    1    0   	  -0.218850100145	   3.207365932752	   2.238955930729
36    6    0   	  -3.261541670486	  -2.682535069920	  -0.047439640804
37    1    0   	  -3.714815217266	  -3.678600498605	   0.064932100424
38    1    0   	  -3.001798799835	  -2.574791652409	  -1.106139273188
39    6    0   	  -4.362204935016	  -1.642109984281	   0.317640728808
40    1    0   	  -5.155190039739	  -1.753158773207	  -0.427913417747
41    1    0   	  -4.814493720634	  -1.939132904036	   1.272630773310
42    6    0   	  -2.673006940582	   2.952407130201	  -0.750849792640
43    1    0   	  -2.590824760490	   3.975154150421	  -0.370934547537
44    1    0   	  -2.937626547861	   3.040211054092	  -1.811803395041
45    6    0   	  -3.942492500790	  -0.195270408489	   0.442005684711
46    1    0   	  -1.308850274538	   1.332597114797	  -1.268546123536
47    6    0   	  -4.173855592214	   0.829862192261	  -0.400993644459
48    1    0   	  -3.459069899537	   0.060708523037	   1.385420836734
49    6    0   	  -3.829414966032	   2.250113124806	   0.020284838518
50    1    0   	  -3.578277328444	   2.257221997115	   1.086488210443
51    1    0   	  -4.728734960951	   2.871334255860	  -0.096090437107
52    6    0   	  -4.836811793968	   0.691434698596	  -1.750706126617
53    1    0   	  -5.069473401678	  -0.343337702594	  -2.010232350341
54    1    0   	  -5.770992772677	   1.266518453879	  -1.783687811212
55    1    0   	  -4.198080969132	   1.095112347818	  -2.546445707921
56    6    0   	   4.887039036088	   1.111859120895	   0.310430538470
57    1    0   	   1.409867699609	   1.503504265426	  -0.636184182475
58    6    0   	   5.330713820412	   1.691929174785	   1.631022514739
59    1    0   	   6.259714481613	   2.262406417467	   1.508366267112
60    1    0   	   4.583968201989	   2.396168637318	   2.019166907702
61    1    0   	   5.503362032740	   0.919949233576	   2.385260705176
62    6    0   	   4.641247182089	   2.134682351286	  -0.770366888760
63    1    0   	   3.938743793456	   2.900480139768	  -0.420401420396
64    1    0   	   5.574590878787	   2.659634616237	  -1.009529816886
65    1    0   	   4.252356784263	   1.716451221733	  -1.700985842030
66    1    0   	  -0.826091284807	  -2.813256936822	  -0.934972167863
---------------------------------------------------------------------
SCF Done:  E(scf) =  -977.110983749080     A.U.


IRC-IRC-IRC-IRC-IRC-IRC-IRC-IRC-IRC-IRC-IRC-IRC-IRC-IRC-IRC-IRC-IRC-IRC
Pt  67  Step number   1 out of a maximum of  2608
NET REACTION COORDINATE UP TO THIS POINT =    67.00000
IRC-IRC-IRC-IRC-IRC-IRC-IRC-IRC-IRC-IRC-IRC-IRC-IRC-IRC-IRC-IRC-IRC-IRC
                         Input orientation:
---------------------------------------------------------------------
Center     Atomic      Atomic             Coordinates (Angstroms)
Number     Number       Type             X           Y           Z
---------------------------------------------------------------------
1     6    0   	  -0.795311362299	  -2.695474739104	   0.146865371741
2     6    0   	   0.555898330023	  -2.593951802476	   0.753929830894
3     6    0   	   1.966401663057	  -1.398373676804	  -0.884633094121
4     6    0   	   1.328033147848	  -1.141494494851	   0.393180862074
5     6    0   	   0.297273480639	  -0.010258539528	   0.489761348217
6     6    0   	   0.811742888069	   1.428594627239	   0.289040917837
7     1    0   	   0.526958165204	  -2.565246921125	   1.843734240661
8     1    0   	   1.217950357584	  -3.412720359129	   0.460746485012
9     1    0   	   2.102700251968	  -1.081037080468	   1.166329676175
10    1    0   	  -0.504294841539	  -0.212732575368	  -0.220162047480
11    1    0   	  -0.175042013472	  -0.077447198715	   1.475956408126
12    1    0   	   1.490032266020	   1.694546824278	   1.107725602164
13    6    0   	   4.776895419186	  -0.219895217294	   0.152829621155
14    1    0   	   5.025367187422	  -0.845694474952	   1.010966871269
15    6    0   	   4.449414714583	  -0.976666105954	  -1.097487342907
16    1    0   	   4.221052957026	  -0.323084174248	  -1.942336909775
17    1    0   	   5.308799785422	  -1.588622126542	  -1.397337219366
18    6    0   	   3.281412551970	  -2.054893250206	  -0.924297412459
19    1    0   	   3.484720431526	  -2.611864951573	  -0.005244915320
20    1    0   	   3.342292035719	  -2.725909615333	  -1.787342021570
21    6    0   	   1.303146553347	  -1.071408266776	  -2.166242604951
22    1    0   	   0.925786948745	  -0.043911007113	  -2.180211139094
23    1    0   	   1.938972834184	  -1.257446024111	  -3.032819542351
24    1    0   	   0.403530372237	  -1.702232519134	  -2.255043384056
25    6    0   	  -1.993105327551	  -2.637896159480	   0.776827642478
26    6    0   	  -2.171573135967	  -2.607016053892	   2.272151109880
27    1    0   	  -2.778720603157	  -3.465547844337	   2.585873257591
28    1    0   	  -1.234267755235	  -2.649351583713	   2.829189161982
29    1    0   	  -2.716078218078	  -1.712490267723	   2.590829110078
30    6    0   	  -0.355105570586	   2.419388857573	   0.238786021330
31    6    0   	  -1.370853747198	   2.207422616285	  -0.617446574053
32    6    0   	  -0.272890606454	   3.568939287095	   1.211489041367
33    1    0   	   0.640483066597	   4.154453717500	   1.043231641190
34    1    0   	  -1.122203309380	   4.250165379068	   1.139757167712
35    1    0   	  -0.222235200022	   3.202947851219	   2.245812541596
36    6    0   	  -3.262323327924	  -2.682253507948	  -0.050507837988
37    1    0   	  -3.716190569302	  -3.678144886939	   0.061046986955
38    1    0   	  -3.001589046524	  -2.574213718295	  -1.108933553499
39    6    0   	  -4.362816658273	  -1.641444446914	   0.314063137963
40    1    0   	  -5.155050659141	  -1.751606790669	  -0.432421954400
41    1    0   	  -4.816291789586	  -1.938868559972	   1.268367556685
42    6    0   	  -2.670328372055	   2.953094119377	  -0.749010177861
43    1    0   	  -2.588249118744	   3.975555883595	  -0.368290620360
44    1    0   	  -2.933501864627	   3.041739742806	  -1.810250264418
45    6    0   	  -3.942552806945	  -0.194879650506	   0.439863122312
46    1    0   	  -1.305519421636	   1.333736679601	  -1.266759030697
47    6    0   	  -4.172653819778	   0.830994818531	  -0.402583026356
48    1    0   	  -3.459989905903	   0.060225761458	   1.383952409645
49    6    0   	  -3.828046475603	   2.250781690780	   0.020141569503
50    1    0   	  -3.578245858607	   2.256999065818	   1.086666014013
51    1    0   	  -4.726930318034	   2.872507011825	  -0.096909132830
52    6    0   	  -4.834346397331	   0.693887234696	  -1.753048842808
53    1    0   	  -5.067069839280	  -0.340598894127	  -2.013669774818
54    1    0   	  -5.768322086884	   1.269279665433	  -1.786448243706
55    1    0   	  -4.194724077515	   1.098047694970	  -2.547827166449
56    6    0   	   4.885807815803	   1.115473662986	   0.303983573892
57    1    0   	   1.412747403445	   1.503727807048	  -0.627864068850
58    6    0   	   5.327984529983	   1.701058287819	   1.622696835951
59    1    0   	   6.256889724917	   2.271395995415	   1.498659997986
60    1    0   	   4.580580489773	   2.406586095584	   2.007276438292
61    1    0   	   5.500191668413	   0.932169815500	   2.380227147283
62    6    0   	   4.640526008645	   2.133919768541	  -0.781122247252
63    1    0   	   3.936756918741	   2.900392913424	  -0.435108116935
64    1    0   	   5.573667889384	   2.658902237564	  -1.020994039573
65    1    0   	   4.253423788500	   1.711694198429	  -1.710714536406
66    1    0   	  -0.825985297974	  -2.815609739214	  -0.935761423422
---------------------------------------------------------------------
SCF Done:  E(scf) =  -977.110977989924     A.U.


IRC-IRC-IRC-IRC-IRC-IRC-IRC-IRC-IRC-IRC-IRC-IRC-IRC-IRC-IRC-IRC-IRC-IRC
Pt  68  Step number   1 out of a maximum of  2608
NET REACTION COORDINATE UP TO THIS POINT =    68.00000
IRC-IRC-IRC-IRC-IRC-IRC-IRC-IRC-IRC-IRC-IRC-IRC-IRC-IRC-IRC-IRC-IRC-IRC
                         Input orientation:
---------------------------------------------------------------------
Center     Atomic      Atomic             Coordinates (Angstroms)
Number     Number       Type             X           Y           Z
---------------------------------------------------------------------
1     6    0   	  -0.796290794577	  -2.696936112173	   0.146062341786
2     6    0   	   0.554321247843	  -2.596617814909	   0.754524113998
3     6    0   	   1.967362188901	  -1.399969581557	  -0.880593731415
4     6    0   	   1.327427443798	  -1.143651105158	   0.396440905992
5     6    0   	   0.296740170602	  -0.012335992333	   0.492441936927
6     6    0   	   0.812063805489	   1.426645651410	   0.294746470972
7     1    0   	   0.524429312610	  -2.569078630910	   1.844327467734
8     1    0   	   1.216407383236	  -3.415226342641	   0.461023165991
9     1    0   	   2.100806564702	  -1.084171733641	   1.170904217499
10    1    0   	  -0.503430077719	  -0.213561989097	  -0.219405201541
11    1    0   	  -0.177604559921	  -0.080719722333	   1.477577310338
12    1    0   	   1.488963159749	   1.691161032153	   1.115046816134
13    6    0   	   4.776483955915	  -0.216941799006	   0.151981620584
14    1    0   	   5.024351383594	  -0.839050937173	   1.012969420409
15    6    0   	   4.450406592340	  -0.979059036013	  -1.095514980415
16    1    0   	   4.222691229351	  -0.329019367252	  -1.943262368192
17    1    0   	   5.310229703928	  -1.592036967792	  -1.392005858810
18    6    0   	   3.282427674586	  -2.056561103509	  -0.919067853697
19    1    0   	   3.485881249419	  -2.611505700629	   0.001174631124
20    1    0   	   3.342850850036	  -2.729599156875	  -1.780615086833
21    6    0   	   1.305581223550	  -1.071817134291	  -2.162658069770
22    1    0   	   0.935539391379	  -0.041316963117	  -2.177939409492
23    1    0   	   1.939920780800	  -1.263306820432	  -3.029247801669
24    1    0   	   0.400904022131	  -1.695886090781	  -2.249756323882
25    6    0   	  -1.994665213812	  -2.638613025239	   0.774917807606
26    6    0   	  -2.174519243559	  -2.608141875682	   2.270076696143
27    1    0   	  -2.782524591265	  -3.466399855516	   2.582888517271
28    1    0   	  -1.237779149014	  -2.651292441271	   2.827998960155
29    1    0   	  -2.718760123166	  -1.713395539643	   2.588568615350
30    6    0   	  -0.354405764434	   2.417858029650	   0.243889609879
31    6    0   	  -1.368677945209	   2.207548647129	  -0.614494284437
32    6    0   	  -0.273668178990	   3.565809630037	   1.218604260201
33    1    0   	   0.640215389467	   4.151294361059	   1.053050403527
34    1    0   	  -1.122631538204	   4.247417985736	   1.146366473436
35    1    0   	  -0.225095478408	   3.198128517196	   2.252428000812
36    6    0   	  -3.263120668162	  -2.681770944442	  -0.053638962765
37    1    0   	  -3.717596719256	  -3.677503205067	   0.056863879006
38    1    0   	  -3.001326237201	  -2.573216013567	  -1.111748432446
39    6    0   	  -4.363450822509	  -1.640643347791	   0.310543073732
40    1    0   	  -5.154959296396	  -1.749875234561	  -0.436846393361
41    1    0   	  -4.818070041879	  -1.938532869063	   1.264157824853
42    6    0   	  -2.667689409672	   2.953882791362	  -0.747061607508
43    1    0   	  -2.585593054089	   3.976027220230	  -0.365483170630
44    1    0   	  -2.929547240438	   3.043449332951	  -1.808543626615
45    6    0   	  -3.942625170595	  -0.194371297872	   0.437837844955
46    1    0   	  -1.302424447880	   1.334899150521	  -1.265103713558
47    6    0   	  -4.171506323572	   0.832281787262	  -0.403991913450
48    1    0   	  -3.460836853622	   0.059793521212	   1.382573264331
49    6    0   	  -3.826655919886	   2.251569902297	   0.020207025735
50    1    0   	  -3.578078557718	   2.256844205033	   1.087021276396
51    1    0   	  -4.725086794066	   2.873843241408	  -0.097397329453
52    6    0   	  -4.832037058765	   0.696574665148	  -1.755164536377
53    1    0   	  -5.064867567346	  -0.337603571662	  -2.016910912081
54    1    0   	  -5.765793029274	   1.272304361877	  -1.788884236995
55    1    0   	  -4.191572184129	   1.101232533128	  -2.549009047047
56    6    0   	   4.884588531478	   1.119066192952	   0.297668524605
57    1    0   	   1.414760907422	   1.502932251159	  -0.620934184366
58    6    0   	   5.325066280747	   1.710409160335	   1.614382893395
59    1    0   	   6.253833572449	   2.280668570487	   1.488960870866
60    1    0   	   4.576902561024	   2.417176917395	   1.995185903174
61    1    0   	   5.496820936306	   0.944794751193	   2.375320738993
62    6    0   	   4.639840791152	   2.132892103891	  -0.791894418820
63    1    0   	   3.934911176902	   2.900127087145	  -0.449935268777
64    1    0   	   5.572810267613	   2.657760302163	  -1.032670723100
65    1    0   	   4.254371188356	   1.706549525190	  -1.720286115540
66    1    0   	  -0.826001233454	  -2.816975048912	  -0.936595539744
---------------------------------------------------------------------
SCF Done:  E(scf) =  -977.110970611594     A.U.


IRC-IRC-IRC-IRC-IRC-IRC-IRC-IRC-IRC-IRC-IRC-IRC-IRC-IRC-IRC-IRC-IRC-IRC
Pt  69  Step number   1 out of a maximum of  2608
NET REACTION COORDINATE UP TO THIS POINT =    69.00000
IRC-IRC-IRC-IRC-IRC-IRC-IRC-IRC-IRC-IRC-IRC-IRC-IRC-IRC-IRC-IRC-IRC-IRC
                         Input orientation:
---------------------------------------------------------------------
Center     Atomic      Atomic             Coordinates (Angstroms)
Number     Number       Type             X           Y           Z
---------------------------------------------------------------------
1     6    0   	  -0.797301063080	  -2.698419346789	   0.145171731086
2     6    0   	   0.552682476830	  -2.599351723241	   0.755109315210
3     6    0   	   1.968420948006	  -1.401857494657	  -0.876408176884
4     6    0   	   1.326853211653	  -1.145876617320	   0.399750286808
5     6    0   	   0.296249950674	  -0.014452986864	   0.494960168240
6     6    0   	   0.812434861974	   1.424669874072	   0.300453578845
7     1    0   	   0.521787516841	  -2.572942105737	   1.844908984495
8     1    0   	   1.214787254269	  -3.417834667000	   0.461357899782
9     1    0   	   2.098830325884	  -1.087348492887	   1.175629044944
10    1    0   	  -0.502359209761	  -0.214359758259	  -0.218989604451
11    1    0   	  -0.180337569912	  -0.084056405515	   1.478921649883
12    1    0   	   1.487897474725	   1.687674076891	   1.122421252170
13    6    0   	   4.776001665302	  -0.213830151574	   0.151173657292
14    1    0   	   5.023196807660	  -0.832085328882	   1.015132366492
15    6    0   	   4.451462088937	  -0.981524887877	  -1.093375743461
16    1    0   	   4.224358873149	  -0.335211572166	  -1.944135227984
17    1    0   	   5.311795540782	  -1.595480173969	  -1.386366916727
18    6    0   	   3.283611424169	  -2.058389097140	  -0.913503705551
19    1    0   	   3.487234743688	  -2.611053540193	   0.008068563233
20    1    0   	   3.343690073997	  -2.733650190762	  -1.773370315758
21    6    0   	   1.308191608761	  -1.072444150729	  -2.158948751899
22    1    0   	   0.949459793103	  -0.037894591734	  -2.176535992074
23    1    0   	   1.939588183281	  -1.272336256160	  -3.025667343059
24    1    0   	   0.396348178826	  -1.685960196293	  -2.242998001932
25    6    0   	  -1.996275494642	  -2.639371092182	   0.772886728015
26    6    0   	  -2.177562558183	  -2.609389632347	   2.267876871656
27    1    0   	  -2.786365822638	  -3.467440944682	   2.579710444404
28    1    0   	  -1.241403659902	  -2.653316369806	   2.826711556537
29    1    0   	  -2.721618932280	  -1.714485909405	   2.586219913762
30    6    0   	  -0.353677174137	   2.416289384444	   0.249063402398
31    6    0   	  -1.366450961012	   2.207726425633	  -0.611507142516
32    6    0   	  -0.274446296771	   3.562532448770	   1.225915692371
33    1    0   	   0.639919920126	   4.148034980066	   1.063113961838
34    1    0   	  -1.123082640022	   4.244503897056	   1.153257525708
35    1    0   	  -0.227927224441	   3.193054170885	   2.259194195544
36    6    0   	  -3.263944795483	  -2.681283039739	  -0.056926778105
37    1    0   	  -3.719054152177	  -3.676848738429	   0.052481383564
38    1    0   	  -3.001062340458	  -2.572184624444	  -1.114709146914
39    6    0   	  -4.364091689196	  -1.639819771081	   0.306882402242
40    1    0   	  -5.154857505829	  -1.748060225989	  -0.441435004963
41    1    0   	  -4.819888164321	  -1.938206873736	   1.259780930559
42    6    0   	  -2.665010462498	   2.954729346616	  -0.744977949892
43    1    0   	  -2.582878455715	   3.976537197423	  -0.362493628530
44    1    0   	  -2.925600803826	   3.045273531047	  -1.806682952087
45    6    0   	  -3.942656352702	  -0.193864178701	   0.435758492664
46    1    0   	  -1.299241752909	   1.336210025981	  -1.263532683709
47    6    0   	  -4.170360513034	   0.833646950597	  -0.405344064101
48    1    0   	  -3.461558486348	   0.059266101116	   1.381121079088
49    6    0   	  -3.825194400297	   2.252389536193	   0.020423477941
50    1    0   	  -3.577773368396	   2.256626786788	   1.087510651354
51    1    0   	  -4.723161319309	   2.875246714066	  -0.097625265071
52    6    0   	  -4.829855229308	   0.699479251146	  -1.757173912186
53    1    0   	  -5.062814684695	  -0.334363648463	  -2.020130953081
54    1    0   	  -5.763397436907	   1.275545428751	  -1.791062386609
55    1    0   	  -4.188626282499	   1.104718544239	  -2.550102465583
56    6    0   	   4.883257196251	   1.122828085298	   0.291176181802
57    1    0   	   1.416854254035	   1.502239218090	  -0.613958601069
58    6    0   	   5.321894751493	   1.720150059920	   1.605820684511
59    1    0   	   6.250526899817	   2.290324538675	   1.479017295618
60    1    0   	   4.572920376192	   2.428188761640	   1.982658634271
61    1    0   	   5.493136205638	   0.957944356132	   2.370295765316
62    6    0   	   4.639130390772	   2.131834904968	  -0.803021157949
63    1    0   	   3.932969327265	   2.899840931428	  -0.465321451153
64    1    0   	   5.571931059620	   2.656593578016	  -1.044674424160
65    1    0   	   4.255428198766	   1.701208335034	  -1.730174139337
66    1    0   	  -0.825989122573	  -2.818370170893	  -0.937513541072
---------------------------------------------------------------------
SCF Done:  E(scf) =  -977.110963014306     A.U.


IRC-IRC-IRC-IRC-IRC-IRC-IRC-IRC-IRC-IRC-IRC-IRC-IRC-IRC-IRC-IRC-IRC-IRC
Pt  70  Step number   1 out of a maximum of  2608
NET REACTION COORDINATE UP TO THIS POINT =    70.00000
IRC-IRC-IRC-IRC-IRC-IRC-IRC-IRC-IRC-IRC-IRC-IRC-IRC-IRC-IRC-IRC-IRC-IRC
                         Input orientation:
---------------------------------------------------------------------
Center     Atomic      Atomic             Coordinates (Angstroms)
Number     Number       Type             X           Y           Z
---------------------------------------------------------------------
1     6    0   	  -0.798310998967	  -2.699803349006	   0.144243507631
2     6    0   	   0.551050819877	  -2.602013671573	   0.755641007203
3     6    0   	   1.969577767683	  -1.403707691109	  -0.872271268396
4     6    0   	   1.326280191694	  -1.148057299285	   0.402963556889
5     6    0   	   0.295753958456	  -0.016523238063	   0.497314308877
6     6    0   	   0.812794272614	   1.422703313118	   0.305768083620
7     1    0   	   0.519162728584	  -2.576740557233	   1.845434738499
8     1    0   	   1.213160655789	  -3.420380647820	   0.461628538222
9     1    0   	   2.096827777314	  -1.090435928197	   1.180278611893
10    1    0   	  -0.501348256344	  -0.215212542026	  -0.218646752193
11    1    0   	  -0.182997164251	  -0.087222521078	   1.480143944679
12    1    0   	   1.487013235968	   1.684248115234	   1.129221433571
13    6    0   	   4.775540044856	  -0.210728035404	   0.150544107784
14    1    0   	   5.021988084626	  -0.825079396674	   1.017504042769
15    6    0   	   4.452661330988	  -0.984029559583	  -1.091039328512
16    1    0   	   4.226290434151	  -0.341465865860	  -1.944834359117
17    1    0   	   5.313526230158	  -1.598969085455	  -1.380411011324
18    6    0   	   3.284891139752	  -2.060200714015	  -0.907878557786
19    1    0   	   3.488568985604	  -2.610632438161	   0.015014580876
20    1    0   	   3.344686980244	  -2.737651311767	  -1.766084737177
21    6    0   	   1.310989717504	  -1.073318797825	  -2.155406507229
22    1    0   	   0.960907308242	  -0.035671150208	  -2.174834095220
23    1    0   	   1.940459768786	  -1.279591402279	  -3.022002518800
24    1    0   	   0.393711946977	  -1.678779539112	  -2.237491452907
25    6    0   	  -1.997878015937	  -2.640128233200	   0.770828556740
26    6    0   	  -2.180590861488	  -2.610784195417	   2.265652601566
27    1    0   	  -2.790144038955	  -3.468686118335	   2.576437963988
28    1    0   	  -1.245007723414	  -2.655486909757	   2.825387701150
29    1    0   	  -2.724506161901	  -1.715778147723	   2.583928929530
30    6    0   	  -0.352956351760	   2.414734404657	   0.254028769700
31    6    0   	  -1.364316978724	   2.207952988496	  -0.608627503387
32    6    0   	  -0.275162471081	   3.559198039439	   1.233086098069
33    1    0   	   0.639643281559	   4.144755144414	   1.072975063602
34    1    0   	  -1.123503196109	   4.241509225944	   1.160158691383
35    1    0   	  -0.230565491800	   3.187849868080	   2.265780493708
36    6    0   	  -3.264761982396	  -2.680747584922	  -0.060239951440
37    1    0   	  -3.720498863229	  -3.676154388794	   0.048010045384
38    1    0   	  -3.000794980931	  -2.571035267408	  -1.117687495503
39    6    0   	  -4.364724545418	  -1.638974463642	   0.303264235709
40    1    0   	  -5.154767488235	  -1.746199713707	  -0.445959927874
41    1    0   	  -4.821668429282	  -1.937892812267	   1.255448612199
42    6    0   	  -2.662441646997	   2.955623834264	  -0.742822054804
43    1    0   	  -2.580226319915	   3.977082219851	  -0.359409752815
44    1    0   	  -2.921889542784	   3.047179448502	  -1.804713729941
45    6    0   	  -3.942670484129	  -0.193345272760	   0.433754458368
46    1    0   	  -1.296202811174	   1.337604860427	  -1.262118129587
47    6    0   	  -4.169301170882	   0.835068372536	  -0.406535315796
48    1    0   	  -3.462140174163	   0.058694045232	   1.379695369092
49    6    0   	  -3.823752685595	   2.253238594703	   0.020826891848
50    1    0   	  -3.577354284599	   2.256386575320	   1.088154108354
51    1    0   	  -4.721260918536	   2.876697907599	  -0.097523419333
52    6    0   	  -4.827937181006	   0.702521576216	  -1.758941691674
53    1    0   	  -5.061044546256	  -0.330969345001	  -2.023150397484
54    1    0   	  -5.761278670842	   1.278913003602	  -1.792833167423
55    1    0   	  -4.186056897647	   1.108405556896	  -2.551010835402
56    6    0   	   4.881916020328	   1.126563998060	   0.284806586027
57    1    0   	   1.418720568672	   1.501431574339	  -0.607528707134
58    6    0   	   5.318575321380	   1.729928700213	   1.597364913181
59    1    0   	   6.247058285081	   2.300048977579	   1.469232361332
60    1    0   	   4.568730020083	   2.439204447178	   1.970140047331
61    1    0   	   5.489267883524	   0.971184846017	   2.365407802518
62    6    0   	   4.638500533222	   2.130675146587	  -0.814077441767
63    1    0   	   3.931130304715	   2.899482235325	  -0.480713805784
64    1    0   	   5.571164324986	   2.655266073555	  -1.056606848768
65    1    0   	   4.256576837554	   1.695733622929	  -1.739959037651
66    1    0   	  -0.825989780592	  -2.819491184077	  -0.938488770538
---------------------------------------------------------------------
SCF Done:  E(scf) =  -977.110955569003     A.U.


IRC-IRC-IRC-IRC-IRC-IRC-IRC-IRC-IRC-IRC-IRC-IRC-IRC-IRC-IRC-IRC-IRC-IRC
Pt  71  Step number   1 out of a maximum of  2608
NET REACTION COORDINATE UP TO THIS POINT =    71.00000
IRC-IRC-IRC-IRC-IRC-IRC-IRC-IRC-IRC-IRC-IRC-IRC-IRC-IRC-IRC-IRC-IRC-IRC
                         Input orientation:
---------------------------------------------------------------------
Center     Atomic      Atomic             Coordinates (Angstroms)
Number     Number       Type             X           Y           Z
---------------------------------------------------------------------
1     6    0   	  -0.799430455598	  -2.701253780547	   0.143116170875
2     6    0   	   0.549239531664	  -2.604907642288	   0.756133513907
3     6    0   	   1.971001789099	  -1.405851787649	  -0.867697127900
4     6    0   	   1.325658867970	  -1.150432194904	   0.406409597924
5     6    0   	   0.295204473815	  -0.018772261658	   0.499607648529
6     6    0   	   0.813174767587	   1.420558029889	   0.311318669396
7     1    0   	   0.516249270501	  -2.580878649853	   1.845916052664
8     1    0   	   1.211339453291	  -3.423165432805	   0.461849989633
9     1    0   	   2.094526446122	  -1.093740760576	   1.185391934717
10    1    0   	  -0.500136618367	  -0.216149632505	  -0.218649512310
11    1    0   	  -0.186048558335	  -0.090626260114	   1.481120867326
12    1    0   	   1.486100213133	   1.680467246023	   1.136341886847
13    6    0   	   4.774994316663	  -0.207255386588	   0.150050418591
14    1    0   	   5.020439095054	  -0.817152902119	   1.020416272212
15    6    0   	   4.454168146690	  -0.986885467982	  -1.088159188847
16    1    0   	   4.228744901785	  -0.348598421740	  -1.945386388669
17    1    0   	   5.315673591531	  -1.602892466708	  -1.373307481821
18    6    0   	   3.286476221103	  -2.062265340067	  -0.901438213578
19    1    0   	   3.490095410311	  -2.610137162020	   0.022981086259
20    1    0   	   3.346082613966	  -2.742210532673	  -1.757722090084
21    6    0   	   1.314368973006	  -1.074529832006	  -2.151594886854
22    1    0   	   0.974226352792	  -0.033508401881	  -2.173273528124
23    1    0   	   1.941632043680	  -1.288116726175	  -3.017942430498
24    1    0   	   0.391076599585	  -1.670719462867	  -2.231527228581
25    6    0   	  -1.999644401258	  -2.640972202341	   0.768466725609
26    6    0   	  -2.183921722037	  -2.612472928449	   2.263108878061
27    1    0   	  -2.794229038045	  -3.470284225571	   2.572666624842
28    1    0   	  -1.248969049783	  -2.658008722552	   2.823825831898
29    1    0   	  -2.727749530753	  -1.717425696108	   2.581396035168
30    6    0   	  -0.352193707289	   2.413032008383	   0.259361863988
31    6    0   	  -1.362056788881	   2.208275350135	  -0.605516424080
32    6    0   	  -0.275937386950	   3.555439130173	   1.240936806495
33    1    0   	   0.639315597088	   4.141083897992	   1.083765614954
34    1    0   	  -1.123975179367	   4.238110510421	   1.167849706034
35    1    0   	  -0.233359082814	   3.181942283772	   2.272937534442
36    6    0   	  -3.265664952978	  -2.680121246440	  -0.063975396714
37    1    0   	  -3.722089650779	  -3.675356966698	   0.042941026292
38    1    0   	  -3.000512453966	  -2.569667672899	  -1.121046533723
39    6    0   	  -4.365415384878	  -1.638025634543	   0.299271067092
40    1    0   	  -5.154678475017	  -1.744088850214	  -0.450933688074
41    1    0   	  -4.823599539107	  -1.937574278148	   1.250662627726
42    6    0   	  -2.659728584101	   2.956673920195	  -0.740309866719
43    1    0   	  -2.577382878896	   3.977728617432	  -0.355838628979
44    1    0   	  -2.918049886505	   3.049391774207	  -1.802366543473
45    6    0   	  -3.942659765987	  -0.192774025220	   0.431602981884
46    1    0   	  -1.292969893466	   1.339287560849	  -1.260707046070
47    6    0   	  -4.168231950925	   0.836706162579	  -0.407662904583
48    1    0   	  -3.462605702687	   0.057975403539	   1.378125388888
49    6    0   	  -3.822180791028	   2.254202208703	   0.021519327313
50    1    0   	  -3.576758931292	   2.256064470811	   1.089072845384
51    1    0   	  -4.719189466988	   2.878348501859	  -0.096985376513
52    6    0   	  -4.826143424825	   0.706074599969	  -1.760604341984
53    1    0   	  -5.059432868068	  -0.327001679652	  -2.026264679273
54    1    0   	  -5.759284015893	   1.282804313685	  -1.794277357040
55    1    0   	  -4.183689320169	   1.112768035775	  -2.551788286364
56    6    0   	   4.880400804192	   1.130700970262	   0.277805954835
57    1    0   	   1.420658374378	   1.500590147211	  -0.600807067848
58    6    0   	   5.314634273802	   1.740894423975	   1.587997856763
59    1    0   	   6.243005905823	   2.310886519963	   1.458502307639
60    1    0   	   4.563792115944	   2.451582775042	   1.956012205630
61    1    0   	   5.484519962000	   0.986114799388	   2.360095489233
62    6    0   	   4.637996480484	   2.129217772720	  -0.826386732878
63    1    0   	   3.929201770877	   2.898880425273	  -0.498072412818
64    1    0   	   5.570543047925	   2.653624630930	  -1.069745660102
65    1    0   	   4.258259708954	   1.689391837244	  -1.750845523976
66    1    0   	  -0.825989717755	  -2.820538337147	  -0.939677928405
---------------------------------------------------------------------
SCF Done:  E(scf) =  -977.110947300047     A.U.


IRC-IRC-IRC-IRC-IRC-IRC-IRC-IRC-IRC-IRC-IRC-IRC-IRC-IRC-IRC-IRC-IRC-IRC
Pt  72  Step number   1 out of a maximum of  2608
NET REACTION COORDINATE UP TO THIS POINT =    72.00000
IRC-IRC-IRC-IRC-IRC-IRC-IRC-IRC-IRC-IRC-IRC-IRC-IRC-IRC-IRC-IRC-IRC-IRC
                         Input orientation:
---------------------------------------------------------------------
Center     Atomic      Atomic             Coordinates (Angstroms)
Number     Number       Type             X           Y           Z
---------------------------------------------------------------------
1     6    0   	  -0.800473302165	  -2.702519737303	   0.141988000648
2     6    0   	   0.547565462589	  -2.607514136537	   0.756489856261
3     6    0   	   1.972441857068	  -1.407916265723	  -0.863543457065
4     6    0   	   1.325096359912	  -1.152573814935	   0.409431200663
5     6    0   	   0.294694399077	  -0.020798102306	   0.501381758605
6     6    0   	   0.813511654379	   1.418624497459	   0.316048365725
7     1    0   	   0.513565095277	  -2.584600964059	   1.846262133736
8     1    0   	   1.209639799896	  -3.425693302517	   0.461979991471
9     1    0   	   2.092342026709	  -1.096656912356	   1.190014856257
10    1    0   	  -0.498959216306	  -0.217015002635	  -0.219047155632
11    1    0   	  -0.188948798554	  -0.093655453856	   1.481642011592
12    1    0   	   1.485346442318	   1.677015276387	   1.142439818164
13    6    0   	   4.774469940049	  -0.204049103109	   0.149846599617
14    1    0   	   5.018808756454	  -0.809754999273	   1.023467301895
15    6    0   	   4.455736791595	  -0.989633977228	  -1.085234877026
16    1    0   	   4.231363484885	  -0.355374554479	  -1.945739183523
17    1    0   	   5.317870345784	  -1.606676155366	  -1.366265030453
18    6    0   	   3.288068346929	  -2.064254988063	  -0.895349079564
19    1    0   	   3.491496520408	  -2.609709514587	   0.030539482982
20    1    0   	   3.347619930022	  -2.746552536509	  -1.749807858300
21    6    0   	   1.317743175345	  -1.075861588423	  -2.148243043945
22    1    0   	   0.987010315714	  -0.031688783917	  -2.172194315115
23    1    0   	   1.942968895399	  -1.296436852971	  -3.014273473602
24    1    0   	   0.388813677564	  -1.663279833182	  -2.226166735510
25    6    0   	  -2.001274025818	  -2.641766121162	   0.766225390439
26    6    0   	  -2.186967458959	  -2.614184980890	   2.260706385136
27    1    0   	  -2.797896240298	  -3.471987914605	   2.569070553843
28    1    0   	  -1.252581843553	  -2.660465053688	   2.822308366066
29    1    0   	  -2.730778867204	  -1.719171039317	   2.579091957268
30    6    0   	  -0.351522277594	   2.411494214298	   0.264065163699
31    6    0   	  -1.360098788081	   2.208642255685	  -0.602763970376
32    6    0   	  -0.276602983352	   3.551931192513	   1.248043441691
33    1    0   	   0.639035203252	   4.137689339983	   1.093531265771
34    1    0   	  -1.124382634521	   4.234922547953	   1.174950699612
35    1    0   	  -0.235770482786	   3.176374796693	   2.279372725844
36    6    0   	  -3.266514907446	  -2.679522745529	  -0.067461394887
37    1    0   	  -3.723568321148	  -3.674608416604	   0.038177901652
38    1    0   	  -3.000292872986	  -2.568320137075	  -1.124184718611
39    6    0   	  -4.366060386947	  -1.637152356587	   0.295637063431
40    1    0   	  -5.154636902634	  -1.742110989425	  -0.455442276885
41    1    0   	  -4.825346790893	  -1.937326031604	   1.246305196824
42    6    0   	  -2.657384857327	   2.957698518326	  -0.737890707775
43    1    0   	  -2.574871977146	   3.978367632805	  -0.352416927196
44    1    0   	  -2.914824361253	   3.051527147026	  -1.800057749876
45    6    0   	  -3.942639771220	  -0.192259584179	   0.429710760064
46    1    0   	  -1.290166785481	   1.340963785551	  -1.259601020928
47    6    0   	  -4.167371417798	   0.838266778689	  -0.408495393875
48    1    0   	  -3.462866359765	   0.057226899018	   1.376707341592
49    6    0   	  -3.820773450346	   2.255108562877	   0.022404212824
50    1    0   	  -3.576081820926	   2.255713874774	   1.090126836194
51    1    0   	  -4.717333232301	   2.879903931775	  -0.096060110892
52    6    0   	  -4.824845185429	   0.709506816936	  -1.761825547101
53    1    0   	  -5.058338217493	  -0.323166129502	  -2.028873412246
54    1    0   	  -5.757810639713	   1.286537505393	  -1.795087192326
55    1    0   	  -4.182003310729	   1.117021702204	  -2.552266117876
56    6    0   	   4.879024462719	   1.134533631550	   0.271472501329
57    1    0   	   1.422311819532	   1.499873275236	  -0.595075873197
58    6    0   	   5.310827624445	   1.751149107447	   1.579494976568
59    1    0   	   6.239093966414	   2.321044891046	   1.448793977233
60    1    0   	   4.558983165557	   2.463154295912	   1.942983741765
61    1    0   	   5.479904137599	   1.000080254757	   2.355429285100
62    6    0   	   4.637787484960	   2.127782438902	  -0.837769380467
63    1    0   	   3.927792708838	   2.898424822431	  -0.514249738539
64    1    0   	   5.570348767983	   2.651798904729	  -1.081890573582
65    1    0   	   4.260016123919	   1.683394374224	  -1.760900747207
66    1    0   	  -0.826011205874	  -2.821341019871	  -0.940872658170
---------------------------------------------------------------------
SCF Done:  E(scf) =  -977.110939589109     A.U.


IRC-IRC-IRC-IRC-IRC-IRC-IRC-IRC-IRC-IRC-IRC-IRC-IRC-IRC-IRC-IRC-IRC-IRC
Pt  73  Step number   1 out of a maximum of  2608
NET REACTION COORDINATE UP TO THIS POINT =    73.00000
IRC-IRC-IRC-IRC-IRC-IRC-IRC-IRC-IRC-IRC-IRC-IRC-IRC-IRC-IRC-IRC-IRC-IRC
                         Input orientation:
---------------------------------------------------------------------
Center     Atomic      Atomic             Coordinates (Angstroms)
Number     Number       Type             X           Y           Z
---------------------------------------------------------------------
1     6    0   	  -0.801610257460	  -2.703766507657	   0.140698528596
2     6    0   	   0.545747014698	  -2.610258148298	   0.756797721957
3     6    0   	   1.974150532707	  -1.410088951136	  -0.859059738615
4     6    0   	   1.324472208214	  -1.154835403597	   0.412610412672
5     6    0   	   0.294104423282	  -0.022940533725	   0.503110395083
6     6    0   	   0.813819150077	   1.416535058504	   0.320678597827
7     1    0   	   0.510658678843	  -2.588583112563	   1.846554650805
8     1    0   	   1.207781519509	  -3.428355612309	   0.462017088534
9     1    0   	   2.089901438540	  -1.099702048204	   1.194977038463
10    1    0   	  -0.497786946189	  -0.218041544742	  -0.219554675652
11    1    0   	  -0.192027277568	  -0.096723290028	   1.482067167964
12    1    0   	   1.484738166302	   1.673352792309	   1.148302865042
13    6    0   	   4.773950649755	  -0.200560945748	   0.149856873447
14    1    0   	   5.016879311753	  -0.801622437322	   1.027069604206
15    6    0   	   4.457657782540	  -0.992666251205	  -1.081766301771
16    1    0   	   4.234577740765	  -0.362832791162	  -1.945848611267
17    1    0   	   5.320493009333	  -1.610830354190	  -1.358160432070
18    6    0   	   3.289946674651	  -2.066371241775	  -0.888599796521
19    1    0   	   3.493008728821	  -2.609249176658	   0.038881112991
20    1    0   	   3.349514734530	  -2.751196321352	  -1.741088543946
21    6    0   	   1.321689981842	  -1.077626377111	  -2.144800212967
22    1    0   	   0.997652407719	  -0.031293554689	  -2.170604725850
23    1    0   	   1.946063709745	  -1.303123569827	  -3.010145915727
24    1    0   	   0.388926760604	  -1.658832184459	  -2.221996439528
25    6    0   	  -2.003041685507	  -2.642626560249	   0.763734887582
26    6    0   	  -2.190271209754	  -2.616242459006	   2.258042650256
27    1    0   	  -2.801820762995	  -3.474106812956	   2.565011817258
28    1    0   	  -1.256497746424	  -2.663342752546	   2.820593243651
29    1    0   	  -2.734115330308	  -1.721332893396	   2.576645064279
30    6    0   	  -0.350855400172	   2.409831021530	   0.268920888381
31    6    0   	  -1.358143429989	   2.209093111494	  -0.599893006655
32    6    0   	  -0.277300519981	   3.548033735296	   1.255592607877
33    1    0   	   0.638682774692	   4.133978731806	   1.103864326055
34    1    0   	  -1.124858295293	   4.231324159797	   1.182710595007
35    1    0   	  -0.238158190288	   3.170148934348	   2.286138813410
36    6    0   	  -3.267432182604	  -2.678803037734	  -0.071306116097
37    1    0   	  -3.725155966129	  -3.673738051198	   0.032850718220
38    1    0   	  -3.000049634480	  -2.566682961490	  -1.127638551463
39    6    0   	  -4.366760344018	  -1.636177293130	   0.291728221670
40    1    0   	  -5.154618508143	  -1.739908556239	  -0.460269016420
41    1    0   	  -4.827198404432	  -1.937079669075	   1.241613640121
42    6    0   	  -2.655031653856	   2.958866392611	  -0.735155056915
43    1    0   	  -2.572273262307	   3.979100430605	  -0.348567791472
44    1    0   	  -2.911670471153	   3.053941602504	  -1.797396708831
45    6    0   	  -3.942616652215	  -0.191686744363	   0.427739982470
46    1    0   	  -1.287355520355	   1.342883569494	  -1.258578377985
47    6    0   	  -4.166610214288	   0.840041610004	  -0.409184464692
48    1    0   	  -3.462958394083	   0.056346871044	   1.375176686203
49    6    0   	  -3.819327100509	   2.256133419027	   0.023620090864
50    1    0   	  -3.575255217058	   2.255301740972	   1.091484516035
51    1    0   	  -4.715403805432	   2.881663831825	  -0.094613152854
52    6    0   	  -4.823888434226	   0.713435084853	  -1.762812613971
53    1    0   	  -5.057593124384	  -0.318779036973	  -2.031442791635
54    1    0   	  -5.756710752279	   1.290741213912	  -1.795354788823
55    1    0   	  -4.180820039973	   1.121975756437	  -2.552535851729
56    6    0   	   4.877633540124	   1.138655363598	   0.264714932434
57    1    0   	   1.423744502487	   1.498944263547	  -0.589574860112
58    6    0   	   5.306562122691	   1.762347162596	   1.570334653436
59    1    0   	   6.234989317809	   2.331731472354	   1.438603522369
60    1    0   	   4.553825551215	   2.476106238794	   1.928399178273
61    1    0   	   5.474135532657	   1.015484111966	   2.350605379290
62    6    0   	   4.637933568338	   2.126042760579	  -0.850102587201
63    1    0   	   3.926131747819	   2.897349701043	  -0.532247631953
64    1    0   	   5.570381288338	   2.650101979710	  -1.094540374162
65    1    0   	   4.263106004534	   1.676535684815	  -1.771911883520
66    1    0   	  -0.826051126574	  -2.821851851013	  -0.942260484912
---------------------------------------------------------------------
SCF Done:  E(scf) =  -977.110931191076     A.U.


IRC-IRC-IRC-IRC-IRC-IRC-IRC-IRC-IRC-IRC-IRC-IRC-IRC-IRC-IRC-IRC-IRC-IRC
Pt  74  Step number   1 out of a maximum of  2608
NET REACTION COORDINATE UP TO THIS POINT =    74.00000
IRC-IRC-IRC-IRC-IRC-IRC-IRC-IRC-IRC-IRC-IRC-IRC-IRC-IRC-IRC-IRC-IRC-IRC
                         Input orientation:
---------------------------------------------------------------------
Center     Atomic      Atomic             Coordinates (Angstroms)
Number     Number       Type             X           Y           Z
---------------------------------------------------------------------
1     6    0   	  -0.802710567369	  -2.704886545573	   0.139352644527
2     6    0   	   0.543992651187	  -2.612841075872	   0.756981355841
3     6    0   	   1.975967630808	  -1.412234877073	  -0.854751942655
4     6    0   	   1.323865687295	  -1.156953846816	   0.415539109018
5     6    0   	   0.293493514400	  -0.024963147420	   0.504413632638
6     6    0   	   0.814047505709	   1.414565465551	   0.324794453503
7     1    0   	   0.507861937854	  -2.592358332584	   1.846720598772
8     1    0   	   1.205976400225	  -3.430870258122	   0.461940275605
9     1    0   	   2.087434298891	  -1.102479272349	   1.199715760916
10    1    0   	  -0.496582060666	  -0.219042200307	  -0.220507121415
11    1    0   	  -0.195178040673	  -0.099597641206	   1.482035609048
12    1    0   	   1.484139834059	   1.669840077007	   1.153564652633
13    6    0   	   4.773526408625	  -0.197204523386	   0.150086798879
14    1    0   	   5.014989871400	  -0.793697445754	   1.030824090783
15    6    0   	   4.459722612200	  -0.995684121560	  -1.078134866809
16    1    0   	   4.238020872943	  -0.370205196848	  -1.945729084902
17    1    0   	   5.323260492418	  -1.614938685974	  -1.349889450144
18    6    0   	   3.291932416709	  -2.068458602057	  -0.881859948079
19    1    0   	   3.494506394028	  -2.608755671967	   0.047230429765
20    1    0   	   3.351625404100	  -2.755805214557	  -1.732359910243
21    6    0   	   1.325844982892	  -1.079533627656	  -2.141623328627
[truncated: 10,665,096 more chars]
