# Supplementary material for: Inherent atomic mobility changes in carbocation intermediates during the sesterterpene cyclization cascade
Source: Beilstein J Org Chem. 2019 Aug 7;15:1890–7. doi: 10.3762/bjoc.15.184 (PMC6693403; doi:10.3762/bjoc.15.184)
Supplement: File 2 — Coordinates and energies of sesterfisherol biosynthesis. [file Beilstein_J_Org_Chem-15-1890-s002.log]

Entering Link 1

%mem=32TB
%nprocshared=3200
----------------------------------------------------------------------
# opt pm6 neb=nbeads=15
----------------------------------------------------------------------


IRC-IRC-IRC-IRC-IRC-IRC-IRC-IRC-IRC-IRC-IRC-IRC-IRC-IRC-IRC-IRC-IRC-IRC
IRC-IRC-IRC-IRC-IRC-IRC-IRC-IRC-IRC-IRC-IRC-IRC-IRC-IRC-IRC-IRC-IRC-IRC
                         Input orientation:
---------------------------------------------------------------------
Center     Atomic      Atomic             Coordinates (Angstroms)
Number     Number       Type             X           Y           Z
---------------------------------------------------------------------
1     6    0   	  -0.251004446561	  -1.613418335811	   1.485939315953
2     6    0   	   1.229781925341	  -1.900648942995	   1.300802805726
3     6    0   	   2.627193336845	   2.447383793877	   1.205943981659
4     6    0   	   1.792854074709	  -2.232562902572	   0.135671639239
5     6    0   	   3.969865392309	   1.926823070272	   0.614556706101
6     6    0   	   3.920337868391	   0.470039747956	   0.239201044400
7     1    0   	   2.398915126093	   1.872180280870	   2.110124219606
8     1    0   	   4.743383137047	   2.083244210961	   1.373398386771
9     1    0   	   2.749554169127	   3.494159751916	   1.501447539193
10    1    0   	   4.246597967380	   2.550649742689	  -0.239292436151
11    1    0   	   1.150619649789	  -2.340710183144	  -0.740256611029
12    6    0   	   0.922735601240	   1.082693873911	   0.132691162385
13    1    0   	  -0.323832550696	  -0.704713762573	   2.097871643203
14    6    0   	   1.511731988870	   2.289729005043	   0.203248245637
15    1    0   	   1.253618808168	   0.348167516654	   0.856757709973
16    6    0   	  -1.298768969949	  -0.219235742147	  -0.574735796889
17    6    0   	  -1.164478763323	  -1.515507206876	   0.254872366225
18    6    0   	   0.082469953581	   0.546412764302	  -0.967410522675
19    6    0   	  -2.065680391873	   0.897037006309	  -0.062733744474
20    1    0   	  -2.186299260635	  -1.764093012517	   0.564425382091
21    1    0   	  -0.888709918821	  -2.302565537400	  -0.453516942790
22    1    0   	  -1.711768013246	  -0.487077758943	  -1.552188278500
23    1    0   	  -0.138174783001	   1.290088590317	  -1.736357690168
24    1    0   	   0.629025648698	  -0.273575034745	  -1.450265970708
25    6    0   	  -4.349422816757	   1.249066972962	  -0.813185435979
26    6    0   	  -4.540499872629	  -0.205004465562	  -1.139425010676
27    6    0   	  -2.856345567326	   1.718128286533	  -0.993507921869
28    1    0   	  -4.930675033880	   1.874467720778	  -1.497174010352
29    1    0   	  -4.679845985969	   1.492831215809	   0.198492828061
30    1    0   	  -4.453623756088	  -0.457185020318	  -2.196260841378
31    1    0   	  -2.791893737026	   2.780567164915	  -0.739569813076
32    1    0   	  -2.557410861844	   1.553379812090	  -2.031919922135
33    6    0   	  -4.807676140991	  -1.195864365008	  -0.278615704267
34    1    0   	  -0.659414432813	  -2.407008680764	   2.125384112192
35    6    0   	  -4.977171628784	  -1.025921514338	   1.208598599453
36    1    0   	  -4.313197502933	  -1.711967545753	   1.747815856149
37    1    0   	  -4.786858782413	  -0.012769501555	   1.567026069814
38    1    0   	  -5.997338297929	  -1.295971825333	   1.500955183487
39    6    0   	  -4.986007514605	  -2.609262024904	  -0.764695329472
40    1    0   	  -5.983117357395	  -2.979144366601	  -0.504110151472
41    1    0   	  -4.862282253292	  -2.688937610459	  -1.846064512305
42    1    0   	  -4.266686405117	  -3.279454615132	  -0.279955699152
43    6    0   	  -1.997787745093	   1.301782663181	   1.337536640614
44    1    0   	  -2.700071473989	   2.094537470285	   1.595227452028
45    1    0   	  -2.061479897663	   0.457925334360	   2.028531861561
46    1    0   	  -0.957983459205	   1.695814733829	   1.432121057638
47    6    0   	   1.290982246644	   3.435052116673	  -0.741380678200
48    1    0   	   2.212610646675	   3.649321720526	  -1.294828651562
49    1    0   	   0.497358612173	   3.258457044897	  -1.470018606487
50    1    0   	   1.047093932393	   4.343334045114	  -0.180936714202
51    6    0   	   1.991314318072	  -1.734953123602	   2.590970066660
52    1    0   	   1.491422008501	  -2.277646397236	   3.400478230314
53    1    0   	   3.017535260889	  -2.095005121805	   2.534803370894
54    1    0   	   2.016604846606	  -0.678143359797	   2.891361395057
55    6    0   	   3.249763303588	  -2.454560473278	  -0.166209219993
56    6    0   	   3.735741116540	  -1.524415898615	  -1.287231677021
57    6    0   	   3.785013315056	  -0.035439161462	  -0.992765420714
58    1    0   	   3.389632925407	  -3.487092931509	  -0.507288180193
59    1    0   	   3.873865494301	  -2.339639486519	   0.722213024436
60    1    0   	   4.733451499330	  -1.843169208597	  -1.616350499148
61    1    0   	   3.087167874484	  -1.674964235249	  -2.162705186987
62    1    0   	   3.958929573573	  -0.221447818644	   1.081514973620
63    6    0   	   3.686938005057	   0.807480004343	  -2.238777277194
64    1    0   	   4.346053180164	   0.414563756841	  -3.020077836694
65    1    0   	   2.666009791460	   0.766331737372	  -2.642994889501
66    1    0   	   3.942033031885	   1.855569878471	  -2.082413111021
---------------------------------------------------------------------
SCF Done:  E(scf) =  -976.594274679567     A.U.


IRC-IRC-IRC-IRC-IRC-IRC-IRC-IRC-IRC-IRC-IRC-IRC-IRC-IRC-IRC-IRC-IRC-IRC
IRC-IRC-IRC-IRC-IRC-IRC-IRC-IRC-IRC-IRC-IRC-IRC-IRC-IRC-IRC-IRC-IRC-IRC
                         Input orientation:
---------------------------------------------------------------------
Center     Atomic      Atomic             Coordinates (Angstroms)
Number     Number       Type             X           Y           Z
---------------------------------------------------------------------
1     6    0   	  -0.251067109854	  -1.613860266721	   1.485333492886
2     6    0   	   1.229767150862	  -1.900936441920	   1.300333634695
3     6    0   	   2.626877675171	   2.447241174041	   1.206292983884
4     6    0   	   1.793017804629	  -2.232693740599	   0.135242754159
5     6    0   	   3.969644938301	   1.926857627502	   0.614961500210
6     6    0   	   3.920279023060	   0.470116634720	   0.239416614692
7     1    0   	   2.398553560481	   1.871922379380	   2.110386897436
8     1    0   	   4.743082777132	   2.083259438428	   1.373888183748
9     1    0   	   2.749125605319	   3.493996294813	   1.501918991111
10    1    0   	   4.246392805030	   2.550816332235	  -0.238786891877
11    1    0   	   1.150905818348	  -2.340847084345	  -0.740773575469
12    6    0   	   0.922675120747	   1.082527697418	   0.132663735261
13    1    0   	  -0.324045034892	  -0.705236448401	   2.097370935756
14    6    0   	   1.511534106652	   2.289615939397	   0.203464023955
15    1    0   	   1.253551210412	   0.347935315687	   0.856664064381
16    6    0   	  -1.298636620556	  -0.219491382229	  -0.575288355730
17    6    0   	  -1.164400346186	  -1.515856026277	   0.254176148279
18    6    0   	   0.082620104113	   0.546312350058	  -0.967630487475
19    6    0   	  -2.065685072556	   0.896677349342	  -0.063279215326
20    1    0   	  -2.186251321179	  -1.764513493084	   0.563577751891
21    1    0   	  -0.888511002020	  -2.302823871756	  -0.454266187968
22    1    0   	  -1.711435280161	  -0.487232176756	  -1.552851722189
23    1    0   	  -0.137947336478	   1.290049818141	  -1.736539572706
24    1    0   	   0.629313608716	  -0.273588825644	  -1.450476871259
25    6    0   	  -4.349339417026	   1.249201983030	  -0.813735588387
26    6    0   	  -4.540508047412	  -0.205046481364	  -1.139191518207
27    6    0   	  -2.856191743841	   1.717912390068	  -0.994098469512
28    1    0   	  -4.930455171211	   1.874285550749	  -1.498128053102
29    1    0   	  -4.679842147778	   1.493527486237	   0.197778145931
30    1    0   	  -4.453551708479	  -0.457824579657	  -2.195879523605
31    1    0   	  -2.791468457108	   2.780352872411	  -0.740221555836
32    1    0   	  -2.557254772038	   1.553047211174	  -2.032491813703
33    6    0   	  -4.807734771941	  -1.195440606032	  -0.277861052738
34    1    0   	  -0.659485846747	  -2.407562270962	   2.124634111466
35    6    0   	  -4.977274992581	  -1.024739645719	   1.209259673066
36    1    0   	  -4.312724040956	  -1.709949820638	   1.748841549201
37    1    0   	  -4.787744191555	  -0.011230268667	   1.567078095364
38    1    0   	  -5.997206120539	  -1.295428959693	   1.501836881095
39    6    0   	  -4.985995831955	  -2.609107639565	  -0.763196576686
40    1    0   	  -5.983195880274	  -2.978799031018	  -0.502686056243
41    1    0   	  -4.861961068662	  -2.689410341090	  -1.844483934293
42    1    0   	  -4.266852059947	  -3.279070975696	  -0.277873412215
43    6    0   	  -1.998044380650	   1.301252417992	   1.337049209947
44    1    0   	  -2.700384017535	   2.093967915129	   1.594707791985
45    1    0   	  -2.061854652071	   0.457308452071	   2.027927558407
46    1    0   	  -0.958261864072	   1.695290091037	   1.431852945651
47    6    0   	   1.290758518068	   3.435046448227	  -0.741028473413
48    1    0   	   2.212433571806	   3.649531004042	  -1.294315500072
49    1    0   	   0.497270029859	   3.258437711707	  -1.469812241983
50    1    0   	   1.046650661803	   4.343215415127	  -0.180498045048
51    6    0   	   1.991123536185	  -1.735250579998	   2.590607957304
52    1    0   	   1.491144904679	  -2.277981616693	   3.400037403996
53    1    0   	   3.017372620989	  -2.095241735231	   2.534582467966
54    1    0   	   2.016317416823	  -0.678445968254	   2.891035626680
55    6    0   	   3.249997526931	  -2.454494711530	  -0.166448658366
56    6    0   	   3.736058820712	  -1.524170400999	  -1.287286070365
57    6    0   	   3.785151653810	  -0.035223175568	  -0.992629872773
58    1    0   	   3.390044064705	  -3.486976223381	  -0.507605054807
59    1    0   	   3.873942548077	  -2.339592367403	   0.722087760892
60    1    0   	   4.733855549600	  -1.842789247759	  -1.616272813991
61    1    0   	   3.087642834755	  -1.674678192809	  -2.162880619511
62    1    0   	   3.958829404177	  -0.221466534622	   1.081653343440
63    6    0   	   3.687175148113	   0.807834927189	  -2.238555650235
64    1    0   	   4.346466122061	   0.415083553685	  -3.019791240276
65    1    0   	   2.666319527567	   0.766606292200	  -2.642946622739
66    1    0   	   3.942121883147	   1.855936518901	  -2.082032110162
---------------------------------------------------------------------
SCF Done:  E(scf) =  -976.594274675912     A.U.


IRC-IRC-IRC-IRC-IRC-IRC-IRC-IRC-IRC-IRC-IRC-IRC-IRC-IRC-IRC-IRC-IRC-IRC
Pt  1  Step number   1 out of a maximum of  2639
NET REACTION COORDINATE UP TO THIS POINT =    1.00000
IRC-IRC-IRC-IRC-IRC-IRC-IRC-IRC-IRC-IRC-IRC-IRC-IRC-IRC-IRC-IRC-IRC-IRC
                         Input orientation:
---------------------------------------------------------------------
Center     Atomic      Atomic             Coordinates (Angstroms)
Number     Number       Type             X           Y           Z
---------------------------------------------------------------------
1     6    0   	  -0.251034001255	  -1.613736539694	   1.485553833320
2     6    0   	   1.229782747110	  -1.900851596804	   1.300475968016
3     6    0   	   2.627015286226	   2.447288053999	   1.206168238629
4     6    0   	   1.792952512658	  -2.232682903271	   0.135367111565
5     6    0   	   3.969729691559	   1.926840648736	   0.614771932804
6     6    0   	   3.920300574281	   0.470084362791	   0.239293352123
7     1    0   	   2.398734875918	   1.872017176451	   2.110303710615
8     1    0   	   4.743221650253	   2.083253745090	   1.373641041577
9     1    0   	   2.749311574395	   3.494053404145	   1.501737605859
10    1    0   	   4.246440394841	   2.550753888245	  -0.239021633972
11    1    0   	   1.150783171418	  -2.340869484924	  -0.740603133401
12    6    0   	   0.922697207589	   1.082574496062	   0.132722835857
13    1    0   	  -0.323955203127	  -0.705088305393	   2.097561619930
14    6    0   	   1.511603762377	   2.289645313377	   0.203418421858
15    1    0   	   1.253585997922	   0.348012239733	   0.856748573620
16    6    0   	  -1.298685838444	  -0.219417584766	  -0.575056798094
17    6    0   	  -1.164439422878	  -1.515756152504	   0.254447127571
18    6    0   	   0.082573154172	   0.546323375379	  -0.967501928520
19    6    0   	  -2.065678861691	   0.896789726615	  -0.063044782450
20    1    0   	  -2.186276492665	  -1.764378020763	   0.563921138300
21    1    0   	  -0.888612868224	  -2.302757055607	  -0.453983150002
22    1    0   	  -1.711549108759	  -0.487181456222	  -1.552586925498
23    1    0   	  -0.138008920615	   1.290027354769	  -1.736438870812
24    1    0   	   0.629223558770	  -0.273617795945	  -1.450329736571
25    6    0   	  -4.349341971406	   1.249175738181	  -0.813556263286
26    6    0   	  -4.540464917008	  -0.205008955997	  -1.139302809949
27    6    0   	  -2.856210863637	   1.718000337579	  -0.993853026570
28    1    0   	  -4.930480076659	   1.874372660604	  -1.497826919440
29    1    0   	  -4.679852211108	   1.493298613357	   0.198004464986
30    1    0   	  -4.453484507231	  -0.457573772177	  -2.196039660796
31    1    0   	  -2.791577766749	   2.780435894489	  -0.739939797400
32    1    0   	  -2.557249072920	   1.553186973378	  -2.032247848632
33    6    0   	  -4.807701517638	  -1.195574869170	  -0.278173772759
34    1    0   	  -0.659432089023	  -2.407405401884	   2.124908657943
35    6    0   	  -4.977296691827	  -1.025152354982	   1.208972823726
36    1    0   	  -4.312951178733	  -1.710637662866	   1.748453533484
37    1    0   	  -4.787539492511	  -0.011763821897	   1.567017047090
38    1    0   	  -5.997315139930	  -1.295650975317	   1.501425218275
39    6    0   	  -4.985937951615	  -2.609148263449	  -0.763786397294
40    1    0   	  -5.983112104013	  -2.978929204151	  -0.503303985696
41    1    0   	  -4.861949747134	  -2.689228502457	  -1.845095361054
42    1    0   	  -4.266745427462	  -3.279179933639	  -0.278630057284
43    6    0   	  -1.997968378323	   1.301405555323	   1.337269565463
44    1    0   	  -2.700296880277	   2.094127918704	   1.594938278001
45    1    0   	  -2.061735551185	   0.457485489062	   2.028180295202
46    1    0   	  -0.958183237912	   1.695453435497	   1.432004023835
47    6    0   	   1.290815703770	   3.435027130029	  -0.741130109973
48    1    0   	   2.212461910942	   3.649435615702	  -1.294494610534
49    1    0   	   0.497268363597	   3.258409507947	  -1.469847767469
50    1    0   	   1.046787211767	   4.343241802135	  -0.180639295438
51    6    0   	   1.991224060775	  -1.735116928811	   2.590693713282
52    1    0   	   1.491284666035	  -2.277796031939	   3.400182117477
53    1    0   	   3.017461839915	  -2.095133309217	   2.534621596194
54    1    0   	   2.016460374003	  -0.678297842209	   2.891066815580
55    6    0   	   3.249908586806	  -2.454529033490	  -0.166405099850
56    6    0   	   3.735918341764	  -1.524262422907	  -1.287312902965
57    6    0   	   3.785058603922	  -0.035303482270	  -0.992721160887
58    1    0   	   3.389911745219	  -3.487028314046	  -0.507526021967
59    1    0   	   3.873911850004	  -2.339601642523	   0.722087282375
60    1    0   	   4.733688451164	  -1.842914979433	  -1.616348340256
61    1    0   	   3.087444071218	  -1.674795025021	  -2.162859983120
62    1    0   	   3.958908833598	  -0.221464830615	   1.081555715696
63    6    0   	   3.686987756133	   0.807706324260	  -2.238672128485
64    1    0   	   4.346218437788	   0.414925027989	  -3.019944059237
65    1    0   	   2.666100607423	   0.766461713364	  -2.642982615585
66    1    0   	   3.941945119753	   1.855814102413	  -2.082207772939
---------------------------------------------------------------------
SCF Done:  E(scf) =  -976.594274675579     A.U.


IRC-IRC-IRC-IRC-IRC-IRC-IRC-IRC-IRC-IRC-IRC-IRC-IRC-IRC-IRC-IRC-IRC-IRC
Pt  2  Step number   1 out of a maximum of  2639
NET REACTION COORDINATE UP TO THIS POINT =    2.00000
IRC-IRC-IRC-IRC-IRC-IRC-IRC-IRC-IRC-IRC-IRC-IRC-IRC-IRC-IRC-IRC-IRC-IRC
                         Input orientation:
---------------------------------------------------------------------
Center     Atomic      Atomic             Coordinates (Angstroms)
Number     Number       Type             X           Y           Z
---------------------------------------------------------------------
1     6    0   	  -0.251092553432	  -1.613582906369	   1.485482612612
2     6    0   	   1.229708436977	  -1.900817013634	   1.300507477189
3     6    0   	   2.627131181097	   2.447213156257	   1.206143317844
4     6    0   	   1.792910738117	  -2.232773617717	   0.135453508265
5     6    0   	   3.969885280866	   1.926762854357	   0.614840845168
6     6    0   	   3.920570131752	   0.469981109903	   0.239427119348
7     1    0   	   2.398777488341	   1.871931226677	   2.110249408463
8     1    0   	   4.743339461988	   2.083242488481	   1.373729716368
9     1    0   	   2.749424059041	   3.493970595157	   1.501741376578
10    1    0   	   4.246622541839	   2.550644236462	  -0.238969682686
11    1    0   	   1.150789178735	  -2.340968060852	  -0.740543211048
12    6    0   	   0.922844627767	   1.082580718917	   0.132542445977
13    1    0   	  -0.323968336522	  -0.704898941369	   2.097440707038
14    6    0   	   1.511780922185	   2.289630620372	   0.203320340574
15    1    0   	   1.253712264044	   0.347965376156	   0.856517732112
16    6    0   	  -1.298627200960	  -0.219223725788	  -0.575171324492
17    6    0   	  -1.164400344902	  -1.515583389264	   0.254308646929
18    6    0   	   0.082650038121	   0.546434497111	  -0.967674332802
19    6    0   	  -2.065599089857	   0.896989548743	  -0.063110397511
20    1    0   	  -2.186250001280	  -1.764236999426	   0.563684947611
21    1    0   	  -0.888503053728	  -2.302545988350	  -0.454128603803
22    1    0   	  -1.711561276483	  -0.486981618028	  -1.552673432922
23    1    0   	  -0.137925903674	   1.290194150059	  -1.736556808633
24    1    0   	   0.629240066244	  -0.273498356156	  -1.450585889180
25    6    0   	  -4.349368772750	   1.249121045571	  -0.813350680208
26    6    0   	  -4.540456455416	  -0.205023425900	  -1.139277152221
27    6    0   	  -2.856304575754	   1.718098004395	  -0.993834923191
28    1    0   	  -4.930652450067	   1.874373699856	  -1.497435174731
29    1    0   	  -4.679726471516	   1.493088401709	   0.198294140449
30    1    0   	  -4.453646079997	  -0.457427214306	  -2.196064183825
31    1    0   	  -2.791771953250	   2.780539524150	  -0.739933250429
32    1    0   	  -2.557463728556	   1.553300667186	  -2.032262704879
33    6    0   	  -4.807497104379	  -1.195728736334	  -0.278255830913
34    1    0   	  -0.659594394020	  -2.407183219042	   2.124851752384
35    6    0   	  -4.976828329691	  -1.025539800831	   1.208942279719
36    1    0   	  -4.312280943682	  -1.710988044089	   1.748182282388
37    1    0   	  -4.787160338476	  -0.012183837065	   1.567108190669
38    1    0   	  -5.996725038180	  -1.296240871344	   1.501549543131
39    6    0   	  -4.985732571432	  -2.609238588431	  -0.764054395660
40    1    0   	  -5.982837970099	  -2.979123846516	  -0.503455222277
41    1    0   	  -4.861928591940	  -2.689143246033	  -1.845399508629
42    1    0   	  -4.266410272475	  -3.279299434183	  -0.279128711844
43    6    0   	  -1.997743255004	   1.301678648115	   1.337174338072
44    1    0   	  -2.700020521242	   2.094438293543	   1.594864956494
45    1    0   	  -2.061490555540	   0.457795827123	   2.028133457547
46    1    0   	  -0.957930046324	   1.695670424859	   1.431818680311
47    6    0   	   1.291016778976	   3.435090928816	  -0.741132895532
48    1    0   	   2.212730272418	   3.649666035135	  -1.294320814290
49    1    0   	   0.497608887311	   3.258471809556	  -1.470000162678
50    1    0   	   1.046800978612	   4.343216765883	  -0.180576529521
51    6    0   	   1.991098267895	  -1.735018739953	   2.590740861637
52    1    0   	   1.491061696595	  -2.277550530425	   3.400264239951
53    1    0   	   3.017296174142	  -2.095153445785	   2.534755230801
54    1    0   	   2.016435326528	  -0.678167709154	   2.890993795197
55    6    0   	   3.249868572793	  -2.454657556327	  -0.166240243303
56    6    0   	   3.735866870591	  -1.524376849571	  -1.287141270752
57    6    0   	   3.784697852213	  -0.035395080715	  -0.992556929004
58    1    0   	   3.389894513829	  -3.487159292234	  -0.507343060602
59    1    0   	   3.873827789883	  -2.339710389057	   0.722276371489
60    1    0   	   4.733718432865	  -1.842880765393	  -1.616061275808
61    1    0   	   3.087488467195	  -1.675056092909	  -2.162724427581
62    1    0   	   3.959902790557	  -0.221584658850	   1.081698820118
63    6    0   	   3.685521963595	   0.807679665340	  -2.238455510219
64    1    0   	   4.344522936207	   0.415283481755	  -3.020161948089
65    1    0   	   2.664358804437	   0.765957263044	  -2.642163504522
66    1    0   	   3.940026137363	   1.855927040824	  -2.082088941301
---------------------------------------------------------------------
SCF Done:  E(scf) =  -976.594274646262     A.U.


IRC-IRC-IRC-IRC-IRC-IRC-IRC-IRC-IRC-IRC-IRC-IRC-IRC-IRC-IRC-IRC-IRC-IRC
Pt  3  Step number   1 out of a maximum of  2639
NET REACTION COORDINATE UP TO THIS POINT =    3.00000
IRC-IRC-IRC-IRC-IRC-IRC-IRC-IRC-IRC-IRC-IRC-IRC-IRC-IRC-IRC-IRC-IRC-IRC
                         Input orientation:
---------------------------------------------------------------------
Center     Atomic      Atomic             Coordinates (Angstroms)
Number     Number       Type             X           Y           Z
---------------------------------------------------------------------
1     6    0   	  -0.251088277815	  -1.614076593109	   1.485142987967
2     6    0   	   1.229778307299	  -1.901033472932	   1.300177097507
3     6    0   	   2.626618313661	   2.447247777770	   1.206402346827
4     6    0   	   1.793111564443	  -2.232642282217	   0.135079145668
5     6    0   	   3.969429532733	   1.926932535874	   0.615111464184
6     6    0   	   3.920058244634	   0.470219402923	   0.239476513917
7     1    0   	   2.398281404165	   1.871896855337	   2.110476054448
8     1    0   	   4.742819723320	   2.083293307377	   1.374099694276
9     1    0   	   2.748806892098	   3.494001872901	   1.502059080245
10    1    0   	   4.246211504310	   2.550947375201	  -0.238583059821
11    1    0   	   1.151040592699	  -2.340771640557	  -0.740977546160
12    6    0   	   0.922537477066	   1.082463469784	   0.132658149701
13    1    0   	  -0.324156501814	  -0.705499752351	   2.097240841705
14    6    0   	   1.511321096835	   2.289587965046	   0.203521273800
15    1    0   	   1.253416238357	   0.347872860640	   0.856663064250
16    6    0   	  -1.298673434444	  -0.219676804990	  -0.575452992464
17    6    0   	  -1.164406198446	  -1.516062779932	   0.253970439682
18    6    0   	   0.082571824630	   0.546223780085	  -0.967696205090
19    6    0   	  -2.065762524259	   0.896457603976	  -0.063449011506
20    1    0   	  -2.186259305022	  -1.764762776973	   0.563356822507
21    1    0   	  -0.888479141079	  -2.303005796458	  -0.454493405622
22    1    0   	  -1.711401927308	  -0.487393050441	  -1.553053303132
23    1    0   	  -0.137993938312	   1.289958946951	  -1.736610239469
24    1    0   	   0.629318455220	  -0.273657306546	  -1.450515861545
25    6    0   	  -4.349376945327	   1.249295950191	  -0.813915049325
26    6    0   	  -4.540682416586	  -0.205014950353	  -1.139075880480
27    6    0   	  -2.856172353522	   1.717782345322	  -0.994298005348
28    1    0   	  -4.930414729316	   1.874305200214	  -1.498449135253
29    1    0   	  -4.679889209390	   1.493844060309	   0.197547046673
30    1    0   	  -4.453831759653	  -0.458013462820	  -2.195722162298
31    1    0   	  -2.791279611554	   2.780224006159	  -0.740448947284
32    1    0   	  -2.557235373526	   1.552855605180	  -2.032683948214
33    6    0   	  -4.807889051425	  -1.195224086638	  -0.277518133986
34    1    0   	  -0.659466241604	  -2.407854318993	   2.124380346146
35    6    0   	  -4.977299353884	  -1.024213296610	   1.209588191374
36    1    0   	  -4.312770076067	  -1.709415158249	   1.749281893042
37    1    0   	  -4.787620650014	  -0.010625986334	   1.567174488976
38    1    0   	  -5.997271886642	  -1.294737289597	   1.502290339548
39    6    0   	  -4.986274809188	  -2.608987333573	  -0.762550505312
40    1    0   	  -5.983410434433	  -2.978618148483	  -0.501755216061
41    1    0   	  -4.862480214395	  -2.689498212942	  -1.843843502304
42    1    0   	  -4.267042021215	  -3.278870445837	  -0.277269549504
43    6    0   	  -1.998215612965	   1.300964772381	   1.336902983884
44    1    0   	  -2.700586097705	   2.093653871708	   1.594562115787
45    1    0   	  -2.062035770183	   0.456988629528	   2.027739983814
46    1    0   	  -0.958448318421	   1.695035109390	   1.431768896224
47    6    0   	   1.290535728205	   3.435021850435	  -0.740969761020
48    1    0   	   2.212204788848	   3.649521653838	  -1.294256802478
49    1    0   	   0.497053157681	   3.258403395947	  -1.469754754364
50    1    0   	   1.046417495230	   4.343183155286	  -0.180438130834
51    6    0   	   1.991063030118	  -1.735411906759	   2.590509404486
52    1    0   	   1.491085726024	  -2.278256435597	   3.399868794874
53    1    0   	   3.017345304686	  -2.095317779687	   2.534502939543
54    1    0   	   2.016161884749	  -0.678631829797	   2.891036966840
55    6    0   	   3.250122470508	  -2.454377079879	  -0.166549084568
56    6    0   	   3.736276824589	  -1.524027561676	  -1.287325970431
57    6    0   	   3.785560433688	  -0.035102754147	  -0.992628966096
58    1    0   	   3.390200764020	  -3.486845747782	  -0.507733107825
59    1    0   	   3.874019636548	  -2.339501172046	   0.722028424372
60    1    0   	   4.734043845211	  -1.842738344225	  -1.616324531669
61    1    0   	   3.087863777138	  -1.674411918105	  -2.162951977399
62    1    0   	   3.957968926377	  -0.221371024824	   1.081706173840
63    6    0   	   3.688559800900	   0.807924776060	  -2.238598950166
64    1    0   	   4.348091645563	   0.414865636191	  -3.019435593820
65    1    0   	   2.667949419012	   0.767075921632	  -2.643534306853
66    1    0   	   3.943856799080	   1.855922563396	  -2.081984340932
---------------------------------------------------------------------
SCF Done:  E(scf) =  -976.594274657988     A.U.


IRC-IRC-IRC-IRC-IRC-IRC-IRC-IRC-IRC-IRC-IRC-IRC-IRC-IRC-IRC-IRC-IRC-IRC
Pt  4  Step number   1 out of a maximum of  2639
NET REACTION COORDINATE UP TO THIS POINT =    4.00000
IRC-IRC-IRC-IRC-IRC-IRC-IRC-IRC-IRC-IRC-IRC-IRC-IRC-IRC-IRC-IRC-IRC-IRC
                         Input orientation:
---------------------------------------------------------------------
Center     Atomic      Atomic             Coordinates (Angstroms)
Number     Number       Type             X           Y           Z
---------------------------------------------------------------------
1     6    0   	  -0.251447466727	  -1.615529474478	   1.482509062461
2     6    0   	   1.229616266476	  -1.902065112057	   1.298522806876
3     6    0   	   2.625079736387	   2.446670849771	   1.207895306749
4     6    0   	   1.793912089735	  -2.232869947288	   0.133662626868
5     6    0   	   3.968524920364	   1.927129100964	   0.617377410538
6     6    0   	   3.920000662896	   0.470580773392	   0.240998592454
7     1    0   	   2.396221082974	   1.870745576491	   2.111468186830
8     1    0   	   4.741281398863	   2.083411089514	   1.377023970948
9     1    0   	   2.746690036567	   3.493298975381	   1.504232299094
10    1    0   	   4.245713940376	   2.551665270844	  -0.235801494862
11    1    0   	   1.152542481406	  -2.340630760610	  -0.742947596642
12    6    0   	   0.922400384994	   1.081897699856	   0.131939931374
13    1    0   	  -0.325182175642	  -0.707217824284	   2.094920699030
14    6    0   	   1.510612624216	   2.289225862915	   0.204062157246
15    1    0   	   1.253134326500	   0.346930916896	   0.855621491992
16    6    0   	  -1.297937417305	  -0.220544835760	  -0.578272870040
17    6    0   	  -1.163843111386	  -1.517240461936	   0.250687289725
18    6    0   	   0.083278200118	   0.546095693444	  -0.969262362896
19    6    0   	  -2.065732502773	   0.895104856741	  -0.066300552177
20    1    0   	  -2.185877881867	  -1.766356879841	   0.559147804009
21    1    0   	  -0.887135189835	  -2.303790413239	  -0.457898539073
22    1    0   	  -1.709874922399	  -0.487977058785	  -1.556278441326
23    1    0   	  -0.137101994042	   1.290253080952	  -1.737823818952
24    1    0   	   0.630578359483	  -0.273269475040	  -1.452326951600
25    6    0   	  -4.349181227929	   1.249613333610	  -0.816136432162
26    6    0   	  -4.540964897540	  -0.205467996593	  -1.137775843991
27    6    0   	  -2.855805012527	   1.716751129631	  -0.997272733057
28    1    0   	  -4.929946637900	   1.873206920869	  -1.502166693392
29    1    0   	  -4.679635777505	   1.496616933881	   0.194731528871
30    1    0   	  -4.454200915857	  -0.461058163801	  -2.193806334582
31    1    0   	  -2.789832999770	   2.779234583380	  -0.743817151805
32    1    0   	  -2.557142355575	   1.551234093811	  -2.035635505010
33    6    0   	  -4.808184997472	  -1.193590201113	  -0.273831035720
34    1    0   	  -0.660121657741	  -2.409661828423	   2.121112358365
35    6    0   	  -4.977156487271	  -1.019232825545	   1.212927286595
36    1    0   	  -4.309848923951	  -1.700715995391	   1.753897923055
37    1    0   	  -4.790775500542	  -0.004108883893	   1.567774585669
38    1    0   	  -5.995921365452	  -1.292576791411	   1.507071291425
39    6    0   	  -4.986738327249	  -2.608473252777	  -0.755553405312
40    1    0   	  -5.984367688984	  -2.976922322023	  -0.494926197036
41    1    0   	  -4.861829657657	  -2.691719259610	  -1.836520129360
42    1    0   	  -4.268403038203	  -3.277572576164	  -0.267850161123
43    6    0   	  -1.999110642058	   1.299067586132	   1.334236062100
44    1    0   	  -2.701604239387	   2.091687219995	   1.591754418810
45    1    0   	  -2.063522173106	   0.454781908058	   2.024649231366
46    1    0   	  -0.959368175119	   1.692972827783	   1.430006969734
47    6    0   	   1.289948860120	   3.435265917484	  -0.739712652756
48    1    0   	   2.212001583484	   3.650833125907	  -1.291938509781
49    1    0   	   0.497283600996	   3.258711080167	  -1.469401714295
50    1    0   	   1.044697221417	   4.342814264084	  -0.178675933777
51    6    0   	   1.989882191420	  -1.736968406293	   2.589516599073
52    1    0   	   1.489396613044	  -2.280332898866	   3.398209351234
53    1    0   	   3.016273976199	  -2.096647180551	   2.534099605865
54    1    0   	   2.014544825528	  -0.680339776881	   2.890610073385
55    6    0   	   3.251202697266	  -2.454032913437	  -0.167001741031
56    6    0   	   3.737856532589	  -1.522949636618	  -1.286948801700
57    6    0   	   3.786280760152	  -0.034147709326	  -0.991466031493
58    1    0   	   3.391850957105	  -3.486281620366	  -0.508611159103
59    1    0   	   3.874406253481	  -2.339415103401	   0.722093528311
60    1    0   	   4.736004582010	  -1.841088190115	  -1.615334774674
61    1    0   	   3.090171949962	  -1.673173775694	  -2.163136167356
62    1    0   	   3.957886735839	  -0.221436147685	   1.082924796335
63    6    0   	   3.689295176892	   0.809536053127	  -2.237075291468
64    1    0   	   4.349148429222	   0.417118324157	  -3.018019770642
65    1    0   	   2.668716641337	   0.768587746930	  -2.642239389047
66    1    0   	   3.944216895570	   1.857542849845	  -2.079869119668
---------------------------------------------------------------------
SCF Done:  E(scf) =  -976.594274628802     A.U.


IRC-IRC-IRC-IRC-IRC-IRC-IRC-IRC-IRC-IRC-IRC-IRC-IRC-IRC-IRC-IRC-IRC-IRC
Pt  5  Step number   1 out of a maximum of  2639
NET REACTION COORDINATE UP TO THIS POINT =    5.00000
IRC-IRC-IRC-IRC-IRC-IRC-IRC-IRC-IRC-IRC-IRC-IRC-IRC-IRC-IRC-IRC-IRC-IRC
                         Input orientation:
---------------------------------------------------------------------
Center     Atomic      Atomic             Coordinates (Angstroms)
Number     Number       Type             X           Y           Z
---------------------------------------------------------------------
1     6    0   	  -0.251669805770	  -1.616304860521	   1.481153559467
2     6    0   	   1.229502507960	  -1.902588243338	   1.297629324580
3     6    0   	   2.624202225911	   2.446379977411	   1.208697057757
4     6    0   	   1.794287791651	  -2.232893502566	   0.132853884048
5     6    0   	   3.967974586028	   1.927222813781	   0.618582661309
6     6    0   	   3.919796339892	   0.470784586395	   0.241755816030
7     1    0   	   2.395061833491	   1.870151622220	   2.112015128978
8     1    0   	   4.740389921243	   2.083387822861	   1.378609415759
9     1    0   	   2.745531375841	   3.492940547720	   1.505392381303
10    1    0   	   4.245425175887	   2.552061230725	  -0.234292963023
11    1    0   	   1.153261945643	  -2.340417592513	  -0.744053157178
12    6    0   	   0.922184062879	   1.081640203409	   0.131626607491
13    1    0   	  -0.325754129566	  -0.708149176654	   2.093754829640
14    6    0   	   1.510151001792	   2.289059557802	   0.204368381387
15    1    0   	   1.252800920427	   0.346493303838	   0.855181166744
16    6    0   	  -1.297676598135	  -0.221015669079	  -0.579695556533
17    6    0   	  -1.163645864896	  -1.517870612348	   0.249028909318
18    6    0   	   0.083506694221	   0.546052749969	  -0.970019640663
19    6    0   	  -2.065839894818	   0.894385867103	  -0.067758545570
20    1    0   	  -2.185766531584	  -1.767202096232	   0.557075475533
21    1    0   	  -0.886574253062	  -2.304229415624	  -0.459637285441
22    1    0   	  -1.709181336304	  -0.488310821203	  -1.557913810760
23    1    0   	  -0.136786155155	   1.290427243599	  -1.738404418383
24    1    0   	   0.631086448541	  -0.273053602449	  -1.453202663196
25    6    0   	  -4.349215713085	   1.249758872882	  -0.817252523712
26    6    0   	  -4.541285904554	  -0.205709310793	  -1.137065455848
27    6    0   	  -2.855743344123	   1.716198016768	  -0.998807201101
28    1    0   	  -4.929875272685	   1.872615286301	  -1.504024773164
29    1    0   	  -4.679596193234	   1.498011312135	   0.193310860381
30    1    0   	  -4.454719946063	  -0.462624118228	  -2.192772214124
31    1    0   	  -2.789192635372	   2.778705298947	  -0.745574133320
32    1    0   	  -2.557234532460	   1.550359725120	  -2.037161894075
33    6    0   	  -4.808376380369	  -1.192754746148	  -0.271864187104
34    1    0   	  -0.660458361289	  -2.410649007098	   2.119426186390
35    6    0   	  -4.976959421961	  -1.016649379189	   1.214709849328
36    1    0   	  -4.308569760225	  -1.696614148810	   1.756310811707
37    1    0   	  -4.791673077745	  -0.000829101838	   1.568122893173
38    1    0   	  -5.995288836226	  -1.290891742426	   1.509639070732
39    6    0   	  -4.987064973996	  -2.608215493739	  -0.751822832325
40    1    0   	  -5.984741002193	  -2.976235470673	  -0.490800319665
41    1    0   	  -4.862126707434	  -2.692823728802	  -1.832653948426
42    1    0   	  -4.268849709587	  -3.276783811026	  -0.263268287003
43    6    0   	  -1.999675526044	   1.298089648171	   1.332861692185
44    1    0   	  -2.702261157651	   2.090645412363	   1.590316306920
45    1    0   	  -2.064318763167	   0.453656086493	   2.023074641071
46    1    0   	  -0.959966560477	   1.691970703207	   1.429052259606
47    6    0   	   1.289654879214	   3.435356608237	  -0.739140415914
48    1    0   	   2.211841806239	   3.651105541178	  -1.291085524987
49    1    0   	   0.497170166700	   3.258953419512	  -1.469073687499
50    1    0   	   1.044222482128	   4.342748087324	  -0.177923987787
51    6    0   	   1.989259439501	  -1.737838281066	   2.588985387817
52    1    0   	   1.488515996674	  -2.281527729200	   3.397315203931
53    1    0   	   3.015713684025	  -2.097387780340	   2.533846392669
54    1    0   	   2.013700689918	  -0.681300459157	   2.890435142044
55    6    0   	   3.251726920382	  -2.453789890471	  -0.167319228986
56    6    0   	   3.738728739530	  -1.522354106069	  -1.286825899636
57    6    0   	   3.786953978394	  -0.033637849004	  -0.990937102126
58    1    0   	   3.392618151675	  -3.485925566236	  -0.509156362834
59    1    0   	   3.874583945510	  -2.339349881788	   0.722051456942
60    1    0   	   4.737027261323	  -1.840327222936	  -1.614920780557
61    1    0   	   3.091385362142	  -1.672379273617	  -2.163312733925
62    1    0   	   3.957130670721	  -0.221443020700	   1.083529148732
63    6    0   	   3.690910106915	   0.810327312936	  -2.236421071304
64    1    0   	   4.351288481312	   0.418031915697	  -3.016951988811
65    1    0   	   2.670629081324	   0.769556056935	  -2.642351810574
66    1    0   	   3.945846531756	   1.858271902493	  -2.078812012304
---------------------------------------------------------------------
SCF Done:  E(scf) =  -976.594274568517     A.U.


IRC-IRC-IRC-IRC-IRC-IRC-IRC-IRC-IRC-IRC-IRC-IRC-IRC-IRC-IRC-IRC-IRC-IRC
Pt  6  Step number   1 out of a maximum of  2639
NET REACTION COORDINATE UP TO THIS POINT =    6.00000
IRC-IRC-IRC-IRC-IRC-IRC-IRC-IRC-IRC-IRC-IRC-IRC-IRC-IRC-IRC-IRC-IRC-IRC
                         Input orientation:
---------------------------------------------------------------------
Center     Atomic      Atomic             Coordinates (Angstroms)
Number     Number       Type             X           Y           Z
---------------------------------------------------------------------
1     6    0   	  -0.253102729784	  -1.616836240850	   1.477478915907
2     6    0   	   1.228198402292	  -1.903290977131	   1.295357313231
3     6    0   	   2.622808689724	   2.445463775202	   1.210255708011
4     6    0   	   1.794235275137	  -2.232465988705	   0.130878982514
5     6    0   	   3.967382742174	   1.926557459149	   0.621817160566
6     6    0   	   3.919534392751	   0.470369706941	   0.244021911789
7     1    0   	   2.392270295200	   1.868648381330	   2.112847613192
8     1    0   	   4.738679071434	   2.082144533964	   1.383100372173
9     1    0   	   2.743826043899	   3.491805423577	   1.507854415933
10    1    0   	   4.246180118841	   2.551896101503	  -0.230253192844
11    1    0   	   1.154217982917	  -2.338727126286	  -0.746918190209
12    6    0   	   0.921695082270	   1.081931845620	   0.130107162541
13    1    0   	  -0.327682831921	  -0.709040781133	   2.090552280882
14    6    0   	   1.510101812743	   2.289058078742	   0.204278181987
15    1    0   	   1.251279209920	   0.346171546705	   0.853514274920
16    6    0   	  -1.297582370050	  -0.220124793998	  -0.583358767089
17    6    0   	  -1.163735088123	  -1.517605447654	   0.244455420656
18    6    0   	   0.083522110494	   0.547500532079	  -0.972520707657
19    6    0   	  -2.066575826843	   0.894570502616	  -0.070977164875
20    1    0   	  -2.186094841272	  -1.767581045526	   0.551130624212
21    1    0   	  -0.885599174429	  -2.303219843080	  -0.464618142309
22    1    0   	  -1.708618617689	  -0.486961025227	  -1.561899672043
23    1    0   	  -0.136649091295	   1.292756096972	  -1.740110558058
24    1    0   	   0.631346739440	  -0.270930865668	  -1.456595324547
25    6    0   	  -4.350694235297	   1.249090018697	  -0.817970729832
26    6    0   	  -4.542139509965	  -0.207209075216	  -1.134639108018
27    6    0   	  -2.857602016849	   1.715912775881	  -1.001586453133
28    1    0   	  -4.932356573330	   1.870264411173	  -1.505463695696
29    1    0   	  -4.680322625753	   1.499093183708	   0.192429651135
30    1    0   	  -4.456209247073	  -0.466226700247	  -2.189905282061
31    1    0   	  -2.791053577796	   2.778558638192	  -0.748839957716
32    1    0   	  -2.560053531655	   1.549768417559	  -2.040171940250
33    6    0   	  -4.807871753060	  -1.192728769505	  -0.267225581343
34    1    0   	  -0.662673862515	  -2.411498494466	   2.114860881539
35    6    0   	  -4.975187066820	  -1.013985205452	   1.219205864393
36    1    0   	  -4.303814227378	  -1.690590637908	   1.761373432000
37    1    0   	  -4.792894715796	   0.003171599959	   1.570273582005
38    1    0   	  -5.992184334994	  -1.291022038063	   1.516021983167
39    6    0   	  -4.985882990500	  -2.609285939727	  -0.744276490235
40    1    0   	  -5.983386461090	  -2.977222183428	  -0.482400846818
41    1    0   	  -4.860982381682	  -2.696038440528	  -1.824969422355
42    1    0   	  -4.267319123742	  -3.276583728156	  -0.254420752346
43    6    0   	  -2.000369388616	   1.298006109571	   1.329714955175
44    1    0   	  -2.703015545803	   2.090424954097	   1.587414143882
45    1    0   	  -2.065012547381	   0.453358056202	   2.019686812292
46    1    0   	  -0.960623816869	   1.691771765947	   1.426100582965
47    6    0   	   1.291423248847	   3.435913388587	  -0.738976832862
48    1    0   	   2.214254392383	   3.650816297863	  -1.290196348275
49    1    0   	   0.499319378328	   3.260533416302	  -1.469560977314
50    1    0   	   1.046534030844	   4.343390485553	  -0.177684667676
51    6    0   	   1.986491065651	  -1.740085688516	   2.587760974794
52    1    0   	   1.484665053530	  -2.284447616866	   3.394962653000
53    1    0   	   3.012916518936	  -2.099855191512	   2.533464617680
54    1    0   	   2.010862762732	  -0.683852275752	   2.890274463730
55    6    0   	   3.251937960146	  -2.453715642020	  -0.167771206512
56    6    0   	   3.740618014640	  -1.521741201530	  -1.286083153635
57    6    0   	   3.788809960615	  -0.033239792495	  -0.989196700066
58    1    0   	   3.392817483450	  -3.485691131264	  -0.510115078958
59    1    0   	   3.873809654133	  -2.340104021946	   0.722395562098
60    1    0   	   4.739267525791	  -1.839760711269	  -1.613078567660
61    1    0   	   3.094374858581	  -1.671047471729	  -2.163503988186
62    1    0   	   3.955165122109	  -0.222384843406	   1.085425426927
63    6    0   	   3.695203184351	   0.811544446436	  -2.234297236978
64    1    0   	   4.356510793853	   0.419329038474	  -3.014117034373
65    1    0   	   2.675498509387	   0.771708814311	  -2.641808344118
66    1    0   	   3.950607662011	   1.859174655077	  -2.075569924817
---------------------------------------------------------------------
SCF Done:  E(scf) =  -976.594274291110     A.U.


IRC-IRC-IRC-IRC-IRC-IRC-IRC-IRC-IRC-IRC-IRC-IRC-IRC-IRC-IRC-IRC-IRC-IRC
Pt  7  Step number   1 out of a maximum of  2639
NET REACTION COORDINATE UP TO THIS POINT =    7.00000
IRC-IRC-IRC-IRC-IRC-IRC-IRC-IRC-IRC-IRC-IRC-IRC-IRC-IRC-IRC-IRC-IRC-IRC
                         Input orientation:
---------------------------------------------------------------------
Center     Atomic      Atomic             Coordinates (Angstroms)
Number     Number       Type             X           Y           Z
---------------------------------------------------------------------
1     6    0   	  -0.256071541484	  -1.614817895239	   1.473047998453
2     6    0   	   1.225132800597	  -1.903022233526	   1.293183182439
3     6    0   	   2.622091780915	   2.444241093189	   1.210780618957
4     6    0   	   1.792931153372	  -2.230831114357	   0.129188181136
5     6    0   	   3.967361198357	   1.924619147036	   0.624815227352
6     6    0   	   3.918925252833	   0.468609808202	   0.246597863099
7     1    0   	   2.389206526916	   1.866955142471	   2.112472416345
8     1    0   	   4.737270463491	   2.079351757804	   1.387688510863
9     1    0   	   2.743401141284	   3.490240837010	   1.509473473857
10    1    0   	   4.248298249902	   2.549991621991	  -0.226504119188
11    1    0   	   1.154528452072	  -2.334229552046	  -0.750120822349
12    6    0   	   0.921123661878	   1.083572572755	   0.126469636270
13    1    0   	  -0.330437985869	  -0.707161648612	   2.086333932793
14    6    0   	   1.511007775349	   2.289865333925	   0.202650349885
15    1    0   	   1.249191349157	   0.346489030767	   0.849246120791
16    6    0   	  -1.298888713203	  -0.215694190284	  -0.587434246423
17    6    0   	  -1.164714014611	  -1.514286208771	   0.238696314363
18    6    0   	   0.081979676335	   0.551788772648	  -0.976755131476
19    6    0   	  -2.068403553628	   0.898099209604	  -0.073371107023
20    1    0   	  -2.187310181213	  -1.765679299123	   0.543234069067
21    1    0   	  -0.884743577827	  -2.298425336919	  -0.471297501853
22    1    0   	  -1.710798182334	  -0.481859566243	  -1.565795092561
23    1    0   	  -0.138572585018	   1.298775847275	  -1.742594985667
24    1    0   	   0.628906148521	  -0.265835705764	  -1.463257066234
25    6    0   	  -4.355063429075	   1.246921656844	  -0.814085403520
26    6    0   	  -4.544351453663	  -0.209671767654	  -1.130684507326
27    6    0   	  -2.863513997948	   1.717503495852	  -1.002052833031
28    1    0   	  -4.940118392099	   1.867044455859	  -1.499661453991
29    1    0   	  -4.682216090618	   1.495920594864	   0.197381229190
30    1    0   	  -4.460717349094	  -0.468144122050	  -2.186276453820
31    1    0   	  -2.799136212896	   2.780329320420	  -0.749588016339
32    1    0   	  -2.568432710101	   1.551900792037	  -2.041425076332
33    6    0   	  -4.806075767755	  -1.196024459973	  -0.262978707345
34    1    0   	  -0.667461283552	  -2.409196636767	   2.109617388002
35    6    0   	  -4.969633714962	  -1.018295899605	   1.224007013174
36    1    0   	  -4.294982705106	  -1.693428959862	   1.763961910849
37    1    0   	  -4.788909957466	  -0.000822355517	   1.574978908491
38    1    0   	  -5.985053853241	  -1.298025582064	   1.523620620119
39    6    0   	  -4.982711063457	  -2.612720993859	  -0.740170935205
40    1    0   	  -5.978920352681	  -2.982522087613	  -0.476003589793
41    1    0   	  -4.860273635739	  -2.698835995299	  -1.821207145435
42    1    0   	  -4.261776324910	  -3.278955299754	  -0.252320834143
43    6    0   	  -1.999596092933	   1.301980322376	   1.327058071426
44    1    0   	  -2.701787200136	   2.094435001607	   1.585853544616
45    1    0   	  -2.063209926359	   0.457439108225	   2.017282796095
46    1    0   	  -0.959533093745	   1.695300264295	   1.421889955461
47    6    0   	   1.295069585016	   3.437993001581	  -0.739692735340
48    1    0   	   2.218978476219	   3.652159045186	  -1.289369912167
49    1    0   	   0.503833545249	   3.264408592521	  -1.471616913141
50    1    0   	   1.050634024452	   4.345241780697	  -0.177838232856
51    6    0   	   1.981159942241	  -1.742963492117	   2.587291302909
52    1    0   	   1.477141944203	  -2.287958840369	   3.392696454571
53    1    0   	   3.007237381860	  -2.103928661333	   2.534365188935
54    1    0   	   2.006277401914	  -0.687225327901	   2.891472565294
55    6    0   	   3.250804566259	  -2.454430129352	  -0.166863836818
56    6    0   	   3.743180198122	  -1.523200539837	  -1.284106015424
57    6    0   	   3.792717256537	  -0.034788915989	  -0.987172822942
58    1    0   	   3.390549234984	  -3.486614508260	  -0.509082101358
59    1    0   	   3.871228925078	  -2.342008587312	   0.724466335311
60    1    0   	   4.742124311824	  -1.842569961990	  -1.608894764597
61    1    0   	   3.098693570872	  -1.671619118361	  -2.162965449363
62    1    0   	   3.949789345759	  -0.224213879010	   1.088171782360
63    6    0   	   3.705589871185	   0.809977553763	  -2.232770568614
64    1    0   	   4.368787365919	   0.415996117008	  -3.010065783132
65    1    0   	   2.687229763446	   0.772376746415	  -2.643773259898
66    1    0   	   3.962842345110	   1.857138038683	  -2.073476089908
---------------------------------------------------------------------
SCF Done:  E(scf) =  -976.594272616207     A.U.


IRC-IRC-IRC-IRC-IRC-IRC-IRC-IRC-IRC-IRC-IRC-IRC-IRC-IRC-IRC-IRC-IRC-IRC
Pt  8  Step number   1 out of a maximum of  2639
NET REACTION COORDINATE UP TO THIS POINT =    8.00000
IRC-IRC-IRC-IRC-IRC-IRC-IRC-IRC-IRC-IRC-IRC-IRC-IRC-IRC-IRC-IRC-IRC-IRC
                         Input orientation:
---------------------------------------------------------------------
Center     Atomic      Atomic             Coordinates (Angstroms)
Number     Number       Type             X           Y           Z
---------------------------------------------------------------------
1     6    0   	  -0.258728242666	  -1.612356180371	   1.469406792525
2     6    0   	   1.222323695014	  -1.902544905478	   1.291779964784
3     6    0   	   2.621664164414	   2.443366848384	   1.210451758701
4     6    0   	   1.791897453890	  -2.228902437773	   0.128255485524
5     6    0   	   3.967192883931	   1.923056969527	   0.625960447696
6     6    0   	   3.918075513872	   0.467024901909	   0.248160931711
7     1    0   	   2.387158731264	   1.865650532686	   2.111459261470
8     1    0   	   4.736387972153	   2.077518237383	   1.389642698831
9     1    0   	   2.743428612700	   3.489041069418	   1.510098285122
10    1    0   	   4.249256458520	   2.548081539137	  -0.225216417048
11    1    0   	   1.155139496123	  -2.329235211684	  -0.752589980478
12    6    0   	   0.920635711219	   1.085198878684	   0.122738095670
13    1    0   	  -0.332656223289	  -0.704605212149	   2.082579001337
14    6    0   	   1.511414309978	   2.290934343894	   0.201036671240
15    1    0   	   1.248096266248	   0.346592054811	   0.844248595489
16    6    0   	  -1.300517702207	  -0.211201755924	  -0.590626684102
17    6    0   	  -1.165548281462	  -1.510847340443	   0.233802268933
18    6    0   	   0.079985891210	   0.556176813688	  -0.980697772173
19    6    0   	  -2.070305488722	   0.901735063299	  -0.074656892849
20    1    0   	  -2.188272666022	  -1.763947942520	   0.536309790402
21    1    0   	  -0.883585017035	  -2.293433061241	  -0.477123361747
22    1    0   	  -1.713666608832	  -0.476733114244	  -1.568642742199
23    1    0   	  -0.141301674361	   1.304939421162	  -1.744618309991
24    1    0   	   0.625745529590	  -0.260611506114	  -1.469939651316
25    6    0   	  -4.359538442748	   1.245017411302	  -0.809174487488
26    6    0   	  -4.546924587943	  -0.211510728100	  -1.127082526261
27    6    0   	  -2.869511539197	   1.719369359008	  -1.001207180437
28    1    0   	  -4.947927789612	   1.864793594687	  -1.492207458404
29    1    0   	  -4.684117073291	   1.492138523807	   0.203585710304
30    1    0   	  -4.465744795967	  -0.468443616885	  -2.183237329485
31    1    0   	  -2.807328718442	   2.782301897349	  -0.748739575462
32    1    0   	  -2.576896726789	   1.554575847573	  -2.041399934597
33    6    0   	  -4.804762988447	  -1.199449613812	  -0.260013870309
34    1    0   	  -0.671943183762	  -2.406159696364	   2.105510486905
35    6    0   	  -4.964438193231	  -1.024038899923	   1.227668548897
36    1    0   	  -4.287134614271	  -1.698801232570	   1.764766518855
37    1    0   	  -4.784371097449	  -0.006747194611	   1.579520307607
38    1    0   	  -5.978532169644	  -1.305850120895	   1.529779651300
39    6    0   	  -4.980379044872	  -2.615790850218	  -0.738645446023
40    1    0   	  -5.975219985696	  -2.987611459669	  -0.472185921963
41    1    0   	  -4.860820112765	  -2.700245175063	  -1.820130095995
42    1    0   	  -4.256973563162	  -3.281481070334	  -0.253717335694
43    6    0   	  -1.998609186299	   1.305996354926	   1.325513631801
44    1    0   	  -2.700194279683	   2.098578153202	   1.585529003818
45    1    0   	  -2.061222141147	   0.461553947708	   2.015975801494
46    1    0   	  -0.958165064415	   1.698716851375	   1.418655869777
47    6    0   	   1.296536968975	   3.440781286288	  -0.739449961803
48    1    0   	   2.220840877870	   3.655403850689	  -1.288241934292
49    1    0   	   0.505627269650	   3.268875404545	  -1.472097241050
50    1    0   	   1.052311831783	   4.347202008621	  -0.176176563114
51    6    0   	   1.976070068924	  -1.745807400138	   2.587606484740
52    1    0   	   1.469938243991	  -2.291637652655	   3.391115130279
53    1    0   	   3.001833130895	  -2.107848548303	   2.535966621300
54    1    0   	   2.001799824534	  -0.690623113803	   2.893653742194
55    6    0   	   3.249892710149	  -2.455165625710	  -0.165165704262
56    6    0   	   3.746072428847	  -1.525484362408	  -1.281907970661
57    6    0   	   3.797682357068	  -0.037009829120	  -0.985924478770
58    1    0   	   3.388324542688	  -3.487784436555	  -0.506643517915
59    1    0   	   3.868944123385	  -2.343490303876	   0.727220065450
60    1    0   	   4.745103917687	  -1.846770322016	  -1.604543716864
61    1    0   	   3.103122478946	  -1.673233596392	  -2.162013877414
62    1    0   	   3.942806326444	  -0.225290151452	   1.090433058698
63    6    0   	   3.718798676798	   0.806835995400	  -2.232792519053
64    1    0   	   4.381804093516	   0.408139485980	  -3.007855690106
65    1    0   	   2.701196213684	   0.774585442790	  -2.646246208960
66    1    0   	   3.981732907576	   1.852696363561	  -2.074131303880
---------------------------------------------------------------------
SCF Done:  E(scf) =  -976.594268842591     A.U.


IRC-IRC-IRC-IRC-IRC-IRC-IRC-IRC-IRC-IRC-IRC-IRC-IRC-IRC-IRC-IRC-IRC-IRC
Pt  9  Step number   1 out of a maximum of  2639
NET REACTION COORDINATE UP TO THIS POINT =    9.00000
IRC-IRC-IRC-IRC-IRC-IRC-IRC-IRC-IRC-IRC-IRC-IRC-IRC-IRC-IRC-IRC-IRC-IRC
                         Input orientation:
---------------------------------------------------------------------
Center     Atomic      Atomic             Coordinates (Angstroms)
Number     Number       Type             X           Y           Z
---------------------------------------------------------------------
1     6    0   	  -0.261312629754	  -1.610029914605	   1.466079092963
2     6    0   	   1.219610347147	  -1.902011362429	   1.290567163481
3     6    0   	   2.621227961722	   2.442793349324	   1.209847202446
4     6    0   	   1.790949817766	  -2.226749868783	   0.127460808398
5     6    0   	   3.966789818290	   1.921727929745	   0.626381434898
6     6    0   	   3.916689385701	   0.465650803794	   0.249177498283
7     1    0   	   2.385421733620	   1.864722270785	   2.110302741795
8     1    0   	   4.735548215119	   2.075950265992	   1.390596567440
9     1    0   	   2.743544304058	   3.488168030182	   1.510310314210
10    1    0   	   4.249682481216	   2.546301308528	  -0.224821962770
11    1    0   	   1.155804246490	  -2.324008278302	  -0.754893648711
12    6    0   	   0.919832144556	   1.086976059178	   0.119392721582
13    1    0   	  -0.334875652073	  -0.702230724244	   2.079197167192
14    6    0   	   1.511492713744	   2.292175303377	   0.199521211045
15    1    0   	   1.246802709076	   0.346945452724	   0.839694247086
16    6    0   	  -1.302415818860	  -0.206872670387	  -0.593308060069
17    6    0   	  -1.166453285692	  -1.507597907716	   0.229319017802
18    6    0   	   0.077662854919	   0.560536701931	  -0.984156246466
19    6    0   	  -2.072441003152	   0.905161436310	  -0.075344163115
20    1    0   	  -2.189245881896	  -1.762535192068	   0.529895483560
21    1    0   	  -0.882476392076	  -2.288566368384	  -0.482598116519
22    1    0   	  -1.716809009303	  -0.471714167416	  -1.570990635911
23    1    0   	  -0.144435411534	   1.310963057803	  -1.746231349746
24    1    0   	   0.622285215635	  -0.255447348433	  -1.476021055986
25    6    0   	  -4.364091478759	   1.243278132319	  -0.804062912621
26    6    0   	  -4.549647887877	  -0.213097177976	  -1.123619868659
27    6    0   	  -2.875516033622	   1.721262111371	  -0.999747085453
28    1    0   	  -4.955597141475	   1.862896464972	  -1.484551622103
29    1    0   	  -4.686287167381	   1.488355544216	   0.209961257093
30    1    0   	  -4.470790768726	  -0.468278687708	  -2.180372773972
31    1    0   	  -2.815439860425	   2.784245769003	  -0.747073522674
32    1    0   	  -2.585184603663	   1.557432888124	  -2.040730121684
33    6    0   	  -4.803763379742	  -1.202778526649	  -0.257430294601
34    1    0   	  -0.676184909233	  -2.403349389069	   2.101709930554
35    6    0   	  -4.959761527371	  -1.029947884188	   1.230947327861
36    1    0   	  -4.280022139079	  -1.704555323189	   1.765171360061
37    1    0   	  -4.780226654917	  -0.012935896479	   1.583896843757
38    1    0   	  -5.972629108169	  -1.313713992785	   1.535329122469
39    6    0   	  -4.978391933350	  -2.618653814969	  -0.737805273538
40    1    0   	  -5.971935153700	  -2.992467790872	  -0.469300374360
41    1    0   	  -4.861538876674	  -2.701247046797	  -1.819727355275
42    1    0   	  -4.252656182576	  -3.283943653017	  -0.255808688536
43    6    0   	  -1.997987846399	   1.309594269433	   1.324636498253
44    1    0   	  -2.699038675221	   2.102222852721	   1.585922558654
45    1    0   	  -2.059598496714	   0.465152186913	   2.015211672366
46    1    0   	  -0.957216383888	   1.701812434695	   1.416204846026
47    6    0   	   1.297530076929	   3.443539988832	  -0.739322191592
48    1    0   	   2.221970208835	   3.658039893742	  -1.287925879450
49    1    0   	   0.506373236457	   3.273395683117	  -1.472115426643
50    1    0   	   1.054245712527	   4.349417553819	  -0.174753619507
51    6    0   	   1.971109095433	  -1.748675938597	   2.588098783775
52    1    0   	   1.463039362810	  -2.295611261467	   3.389634606757
53    1    0   	   2.996639028522	  -2.111544248652	   2.537619158709
54    1    0   	   1.997218530841	  -0.694101375511	   2.896222120726
55    6    0   	   3.249050802888	  -2.455710789657	  -0.163395290281
56    6    0   	   3.749067283374	  -1.527887073097	  -1.279856443763
57    6    0   	   3.803364898431	  -0.039324912101	  -0.985171128042
58    1    0   	   3.386102613300	  -3.488842688963	  -0.503922585402
59    1    0   	   3.866800606744	  -2.344621079537	   0.729978614505
60    1    0   	   4.748021310640	  -1.851454662472	  -1.600487564408
61    1    0   	   3.107469805256	  -1.674890525122	  -2.161099038424
62    1    0   	   3.933824560583	  -0.225934700590	   1.092288393801
63    6    0   	   3.735046602052	   0.803154169667	  -2.233632793103
64    1    0   	   4.397996926107	   0.398531622017	  -3.005499633045
65    1    0   	   2.718808505667	   0.777544924341	  -2.650612198706
66    1    0   	   4.005047718336	   1.847264385832	  -2.075798184081
---------------------------------------------------------------------
SCF Done:  E(scf) =  -976.594262524784     A.U.


IRC-IRC-IRC-IRC-IRC-IRC-IRC-IRC-IRC-IRC-IRC-IRC-IRC-IRC-IRC-IRC-IRC-IRC
Pt  10  Step number   1 out of a maximum of  2639
NET REACTION COORDINATE UP TO THIS POINT =    10.00000
IRC-IRC-IRC-IRC-IRC-IRC-IRC-IRC-IRC-IRC-IRC-IRC-IRC-IRC-IRC-IRC-IRC-IRC
                         Input orientation:
---------------------------------------------------------------------
Center     Atomic      Atomic             Coordinates (Angstroms)
Number     Number       Type             X           Y           Z
---------------------------------------------------------------------
1     6    0   	  -0.263689192276	  -1.607836417340	   1.462928682341
2     6    0   	   1.217123285989	  -1.901487029655	   1.289477144202
3     6    0   	   2.620853852164	   2.442339269681	   1.209116560757
4     6    0   	   1.790263007012	  -2.224496344791	   0.126778846474
5     6    0   	   3.966306914545	   1.920638549896	   0.626237753287
6     6    0   	   3.915299497617	   0.464458276065	   0.249840395704
7     1    0   	   2.384072670333	   1.863853922859	   2.109065853614
8     1    0   	   4.734884230027	   2.074814706444	   1.390693258184
9     1    0   	   2.743725995085	   3.487411011321	   1.510397549849
10    1    0   	   4.249651332975	   2.544687308693	  -0.225171168316
11    1    0   	   1.156753223098	  -2.318658979157	  -0.757082537430
12    6    0   	   0.918897173962	   1.088758834604	   0.116382407812
13    1    0   	  -0.336945309601	  -0.699990155092	   2.075986446454
14    6    0   	   1.511364439197	   2.293460905747	   0.198194264150
15    1    0   	   1.245528024978	   0.347344851396	   0.835443046644
16    6    0   	  -1.304357091566	  -0.202764994642	  -0.595702585722
17    6    0   	  -1.167234241391	  -1.504573071435	   0.225062774059
18    6    0   	   0.075254402179	   0.564825777341	  -0.987261749232
19    6    0   	  -2.074667551644	   0.908298449788	  -0.075720324736
20    1    0   	  -2.190044307622	  -1.761480564487	   0.523744214941
21    1    0   	  -0.881172231105	  -2.283859502564	  -0.487872539976
22    1    0   	  -1.719931714478	  -0.466880818671	  -1.573086010315
23    1    0   	  -0.147682805756	   1.316873963991	  -1.747509018699
24    1    0   	   0.618833158455	  -0.250315015472	  -1.481687188328
25    6    0   	  -4.368544491635	   1.241765548964	  -0.799121127973
26    6    0   	  -4.552384754635	  -0.214421195512	  -1.120406811976
27    6    0   	  -2.881318296318	   1.723108787856	  -0.998015753688
28    1    0   	  -4.962887750800	   1.861319637911	  -1.477191844584
29    1    0   	  -4.688585580617	   1.484813731933	   0.216076284408
30    1    0   	  -4.475685226734	  -0.467850925858	  -2.177733986989
31    1    0   	  -2.823188211426	   2.786092300112	  -0.744964531551
32    1    0   	  -2.593067516842	   1.560347342124	  -2.039740248783
33    6    0   	  -4.802973380583	  -1.205822750731	  -0.255156422528
34    1    0   	  -0.680111603014	  -2.400702815014	   2.098109448206
35    6    0   	  -4.955537432165	  -1.035554471760	   1.233870173618
36    1    0   	  -4.273414889586	  -1.709945970871	   1.765330266658
37    1    0   	  -4.776653674414	  -0.018814969139	   1.587942562207
38    1    0   	  -5.967192693791	  -1.321348385812	   1.540356175515
39    6    0   	  -4.976571825156	  -2.621224182386	  -0.737298271048
40    1    0   	  -5.968829450264	  -2.997044188970	  -0.466871860638
41    1    0   	  -4.862302629018	  -2.701960961344	  -1.819628921680
42    1    0   	  -4.248568044502	  -3.286098642071	  -0.258162572592
43    6    0   	  -1.997714336585	   1.312688500253	   1.324143772654
44    1    0   	  -2.698322959748	   2.105279839383	   1.586703095323
45    1    0   	  -2.058364060106	   0.468146058195	   2.014700142002
46    1    0   	  -0.956673814542	   1.704502847672	   1.414331041056
47    6    0   	   1.298171000126	   3.446195607208	  -0.739153549208
48    1    0   	   2.222277756475	   3.659478008711	  -1.288815511369
49    1    0   	   0.505726079354	   3.278215001423	  -1.471050010482
50    1    0   	   1.057310560161	   4.351950153709	  -0.173367656851
51    6    0   	   1.966349477803	  -1.751610452224	   2.588715281047
52    1    0   	   1.456451625002	  -2.299867453374	   3.388183606091
53    1    0   	   2.991709751919	  -2.115108040381	   2.539336021454
54    1    0   	   1.992628145333	  -0.697699491549	   2.899084474225
55    6    0   	   3.248466201157	  -2.456162014543	  -0.161489991137
56    6    0   	   3.752374978690	  -1.530392573367	  -1.277792120936
57    6    0   	   3.809215975957	  -0.041694560206	  -0.984647951106
58    1    0   	   3.384142329206	  -3.489860625628	  -0.500894616385
59    1    0   	   3.864896845672	  -2.345513459993	   0.732862151728
60    1    0   	   4.751307686140	  -1.856244730862	  -1.596207182486
61    1    0   	   3.112267165146	  -1.676867531748	  -2.160230419233
62    1    0   	   3.924831474122	  -0.226247021987	   1.093855436075
63    6    0   	   3.751360449132	   0.799213199969	  -2.234792198361
64    1    0   	   4.414531599618	   0.388779850810	  -3.003556703363
65    1    0   	   2.736334395154	   0.779917016852	  -2.655418715786
66    1    0   	   4.028089800782	   1.841621803401	  -2.077528580445
---------------------------------------------------------------------
SCF Done:  E(scf) =  -976.594254171424     A.U.


IRC-IRC-IRC-IRC-IRC-IRC-IRC-IRC-IRC-IRC-IRC-IRC-IRC-IRC-IRC-IRC-IRC-IRC
Pt  11  Step number   1 out of a maximum of  2639
NET REACTION COORDINATE UP TO THIS POINT =    11.00000
IRC-IRC-IRC-IRC-IRC-IRC-IRC-IRC-IRC-IRC-IRC-IRC-IRC-IRC-IRC-IRC-IRC-IRC
                         Input orientation:
---------------------------------------------------------------------
Center     Atomic      Atomic             Coordinates (Angstroms)
Number     Number       Type             X           Y           Z
---------------------------------------------------------------------
1     6    0   	  -0.266096508711	  -1.605493398386	   1.459670767669
2     6    0   	   1.214602734115	  -1.900842392171	   1.288310052604
3     6    0   	   2.620365326077	   2.441960318563	   1.208399556403
4     6    0   	   1.789704454579	  -2.221924075994	   0.126043913989
5     6    0   	   3.965248391074	   1.919583935737	   0.625112329289
6     6    0   	   3.912876083926	   0.463305031586	   0.249612089534
7     1    0   	   2.383105490831	   1.862853421601	   2.107842492624
8     1    0   	   4.734199587931	   2.073562303700	   1.389296895626
9     1    0   	   2.744082113478	   3.486634587044	   1.510682947997
10    1    0   	   4.248583299287	   2.543115833562	  -0.226641888083
11    1    0   	   1.157980040717	  -2.312756812957	  -0.759433582075
12    6    0   	   0.917515020968	   1.090845694627	   0.113672712830
13    1    0   	  -0.339038556667	  -0.697597708702	   2.072666186401
14    6    0   	   1.510552381536	   2.295139131781	   0.197467732150
15    1    0   	   1.244202668545	   0.347819838761	   0.831063901282
16    6    0   	  -1.306717463323	  -0.198423476998	  -0.597905296890
17    6    0   	  -1.168089029718	  -1.501416049018	   0.220730115127
18    6    0   	   0.072300830653	   0.569625803546	  -0.990069352834
19    6    0   	  -2.077325230187	   0.911547323364	  -0.075749362607
20    1    0   	  -2.190832178482	  -1.760617683043	   0.517475549105
21    1    0   	  -0.879735917570	  -2.278797390265	  -0.493365790288
22    1    0   	  -1.723444075922	  -0.461711054563	  -1.575023638330
23    1    0   	  -0.151572977527	   1.323410260376	  -1.748322038981
24    1    0   	   0.614879852720	  -0.244518401156	  -1.487203807207
25    6    0   	  -4.373365728239	   1.240298940276	  -0.794029967831
26    6    0   	  -4.555290306835	  -0.215702781972	  -1.117134492279
27    6    0   	  -2.887538151227	   1.725148445888	  -0.995876688970
28    1    0   	  -4.970506112991	   1.859737100923	  -1.469739324970
29    1    0   	  -4.691419815481	   1.481246731694	   0.222291873237
30    1    0   	  -4.480710028286	  -0.467322357119	  -2.175037222288
31    1    0   	  -2.831431162030	   2.788093519001	  -0.742296417225
32    1    0   	  -2.601242295135	   1.563618260929	  -2.038327763558
33    6    0   	  -4.802173877867	  -1.208893587631	  -0.252878922765
34    1    0   	  -0.684037095326	  -2.397904240192	   2.094419816693
35    6    0   	  -4.951311312433	  -1.041244016281	   1.236785707224
36    1    0   	  -4.266749558405	  -1.715346254957	   1.765466635033
37    1    0   	  -4.773183069396	  -0.024768217226	   1.592003932479
38    1    0   	  -5.961719201246	  -1.329172710393	   1.545351940249
39    6    0   	  -4.974554178480	  -2.623821309670	  -0.736838761308
40    1    0   	  -5.965496193482	  -3.001763621172	  -0.464567777825
41    1    0   	  -4.862807566000	  -2.702659617358	  -1.819566058823
42    1    0   	  -4.244247261591	  -3.288204487082	  -0.260543338730
43    6    0   	  -1.997848141733	   1.315774239042	   1.324026759261
44    1    0   	  -2.698064073445	   2.108253765698	   1.587944011937
45    1    0   	  -2.057457103358	   0.471068535749	   2.014493029435
46    1    0   	  -0.956567265297	   1.707259136296	   1.412843074792
47    6    0   	   1.297540724429	   3.449534615626	  -0.737876281148
48    1    0   	   2.220802413029	   3.661411502554	  -1.289525566693
49    1    0   	   0.503000299375	   3.284123250923	  -1.468063875340
50    1    0   	   1.059978263921	   4.355096309623	  -0.170441640081
51    6    0   	   1.961392792375	  -1.754682235678	   2.589361754618
52    1    0   	   1.449619628269	  -2.304443036415	   3.386587097049
53    1    0   	   2.986612337136	  -2.118728943050	   2.541139848107
54    1    0   	   1.987725925013	  -0.701504335807	   2.902200652205
55    6    0   	   3.248008471236	  -2.456661408975	  -0.159334152556
56    6    0   	   3.756456385463	  -1.533577607572	  -1.275675394038
57    6    0   	   3.815943248731	  -0.044610229360	  -0.984838893908
58    1    0   	   3.382109214151	  -3.491082888792	  -0.497204589919
59    1    0   	   3.862962511174	  -2.346289621053	   0.736081091091
60    1    0   	   4.755485608857	  -1.862040724149	  -1.591093840686
61    1    0   	   3.118352872717	  -1.679922756146	  -2.159603846448
62    1    0   	   3.912883115506	  -0.226193866755	   1.094660829224
63    6    0   	   3.772152545832	   0.793720966198	  -2.237175267639
64    1    0   	   4.442433137779	   0.380354951643	  -2.998119157793
65    1    0   	   2.761546813848	   0.775211305657	  -2.668068642866
66    1    0   	   4.049366395154	   1.835940401306	  -2.079385506961
---------------------------------------------------------------------
SCF Done:  E(scf) =  -976.594241702424     A.U.


IRC-IRC-IRC-IRC-IRC-IRC-IRC-IRC-IRC-IRC-IRC-IRC-IRC-IRC-IRC-IRC-IRC-IRC
Pt  12  Step number   1 out of a maximum of  2639
NET REACTION COORDINATE UP TO THIS POINT =    12.00000
IRC-IRC-IRC-IRC-IRC-IRC-IRC-IRC-IRC-IRC-IRC-IRC-IRC-IRC-IRC-IRC-IRC-IRC
                         Input orientation:
---------------------------------------------------------------------
Center     Atomic      Atomic             Coordinates (Angstroms)
Number     Number       Type             X           Y           Z
---------------------------------------------------------------------
1     6    0   	  -0.267910602370	  -1.603775970931	   1.457231695264
2     6    0   	   1.212737058747	  -1.900253680207	   1.287333068489
3     6    0   	   2.619938251905	   2.441698984495	   1.207945536821
4     6    0   	   1.789436603522	  -2.219842092334	   0.125423760580
5     6    0   	   3.964199039302	   1.918627387701	   0.623989233386
6     6    0   	   3.910809605960	   0.462298620232	   0.248916218502
7     1    0   	   2.382467210970	   1.862149561538	   2.107068271851
8     1    0   	   4.733436332413	   2.072028187404	   1.388077145120
9     1    0   	   2.744556747858	   3.486034985638	   1.511000838821
10    1    0   	   4.247816291455	   2.542001677204	  -0.227746944124
11    1    0   	   1.159080545439	  -2.308402571338	  -0.761249638758
12    6    0   	   0.916286456856	   1.092563435253	   0.111931605270
13    1    0   	  -0.340666767792	  -0.696046411154	   2.070482362932
14    6    0   	   1.509560396317	   2.296631651142	   0.197340011013
15    1    0   	   1.243210931481	   0.348324483185	   0.827976917176
16    6    0   	  -1.308718334329	  -0.195042430169	  -0.599381110870
17    6    0   	  -1.168975383507	  -1.498910012547	   0.217671486119
18    6    0   	   0.069988147994	   0.573213032791	  -0.991855111319
19    6    0   	  -2.079483217703	   0.914151947988	  -0.075672005246
20    1    0   	  -2.191608278300	  -1.759656693686	   0.513305629940
21    1    0   	  -0.879220611852	  -2.274981750833	  -0.497278735880
22    1    0   	  -1.726175410632	  -0.457753695635	  -1.576332176890
23    1    0   	  -0.154259021347	   1.327948138081	  -1.749007670891
24    1    0   	   0.611760645158	  -0.240581061737	  -1.490378189249
25    6    0   	  -4.377029983911	   1.239264116190	  -0.790430732461
26    6    0   	  -4.557284457521	  -0.216672406659	  -1.114748218920
27    6    0   	  -2.892260209433	   1.726829191852	  -0.994257343445
28    1    0   	  -4.976073088095	   1.858399675827	  -1.464716238125
29    1    0   	  -4.693876633965	   1.478875359467	   0.226568373947
30    1    0   	  -4.484107869363	  -0.466989670772	  -2.173060288570
31    1    0   	  -2.837636211679	   2.789748706572	  -0.740335706916
32    1    0   	  -2.607215033325	   1.566155098784	  -2.037185337956
33    6    0   	  -4.801246642232	  -1.211212724213	  -0.251215870756
34    1    0   	  -0.686786037974	  -2.396088168953	   2.091500123966
35    6    0   	  -4.947981648329	  -1.045360079822	   1.238889367596
36    1    0   	  -4.262502665805	  -1.719885947155	   1.765794397227
37    1    0   	  -4.769516882775	  -0.029190820276	   1.594847285369
38    1    0   	  -5.957913618663	  -1.333692269727	   1.548706101605
39    6    0   	  -4.972989659732	  -2.625736155593	  -0.736570822848
40    1    0   	  -5.963909902422	  -3.004176589405	  -0.464843067307
41    1    0   	  -4.861087240636	  -2.703455941152	  -1.819372920506
42    1    0   	  -4.242591780117	  -3.290373287140	  -0.260778324023
43    6    0   	  -1.998141276275	   1.318206359116	   1.324051113098
44    1    0   	  -2.698050564275	   2.110600044154	   1.589007343188
45    1    0   	  -2.057086207005	   0.473301920977	   2.014359133318
46    1    0   	  -0.956664131003	   1.709342650278	   1.411986667986
47    6    0   	   1.296213097699	   3.452412994664	  -0.736165376590
48    1    0   	   2.218881686552	   3.663845407498	  -1.288981806063
49    1    0   	   0.500428937649	   3.288600312828	  -1.465389956113
50    1    0   	   1.060488301553	   4.357550016489	  -0.167374898420
51    6    0   	   1.957692557274	  -1.756801917448	   2.589739842998
52    1    0   	   1.444424785793	  -2.307276623743	   3.385477173984
53    1    0   	   2.982717959364	  -2.121517587951	   2.542432945792
54    1    0   	   1.984443519271	  -0.704074334634	   2.904096068074
55    6    0   	   3.247851538901	  -2.457099764145	  -0.157607963718
56    6    0   	   3.760398205317	  -1.536496824175	  -1.274058634268
57    6    0   	   3.822166345227	  -0.047265132748	  -0.985364204059
58    1    0   	   3.380570093697	  -3.492131579218	  -0.494175129313
59    1    0   	   3.861587576823	  -2.346961556447	   0.738665406163
60    1    0   	   4.759408166227	  -1.867364721403	  -1.586805298334
61    1    0   	   3.124027238739	  -1.682790399116	  -2.159240407992
62    1    0   	   3.902920620842	  -0.226230690654	   1.094697980673
63    6    0   	   3.788077311020	   0.788965051272	  -2.239648725668
64    1    0   	   4.467418501307	   0.377450643455	  -2.995340894606
65    1    0   	   2.780258397006	   0.765638376539	  -2.679846240464
66    1    0   	   4.058794001287	   1.832782917238	  -2.079817936057
---------------------------------------------------------------------
SCF Done:  E(scf) =  -976.594226533490     A.U.


IRC-IRC-IRC-IRC-IRC-IRC-IRC-IRC-IRC-IRC-IRC-IRC-IRC-IRC-IRC-IRC-IRC-IRC
Pt  13  Step number   1 out of a maximum of  2639
NET REACTION COORDINATE UP TO THIS POINT =    13.00000
IRC-IRC-IRC-IRC-IRC-IRC-IRC-IRC-IRC-IRC-IRC-IRC-IRC-IRC-IRC-IRC-IRC-IRC
                         Input orientation:
---------------------------------------------------------------------
Center     Atomic      Atomic             Coordinates (Angstroms)
Number     Number       Type             X           Y           Z
---------------------------------------------------------------------
1     6    0   	  -0.269554490941	  -1.602187696106	   1.455236029771
2     6    0   	   1.210994956440	  -1.900073085095	   1.287070677758
3     6    0   	   2.619881218019	   2.441589406486	   1.207761088775
4     6    0   	   1.789067666237	  -2.218520060480	   0.125526072521
5     6    0   	   3.963170844255	   1.918346621861	   0.621934518033
6     6    0   	   3.908321700708	   0.461921831722	   0.247796051262
7     1    0   	   2.383042587250	   1.861244421918	   2.106549433027
8     1    0   	   4.733687414039	   2.071811038712	   1.384786283928
9     1    0   	   2.745210335780	   3.485575855939	   1.511708736313
10    1    0   	   4.245625757832	   2.541362563298	  -0.230445357042
11    1    0   	   1.159948219259	  -2.304875193665	  -0.762308857555
12    6    0   	   0.915606031943	   1.093898037969	   0.110645292157
13    1    0   	  -0.342037168093	  -0.694232079533	   2.068165360547
14    6    0   	   1.508553751123	   2.298026117966	   0.197940324935
15    1    0   	   1.243249511478	   0.348238316382	   0.824967336886
16    6    0   	  -1.309922778198	  -0.192227912252	  -0.600932408161
17    6    0   	  -1.169240916288	  -1.496907474840	   0.214685892894
18    6    0   	   0.068428157527	   0.576554897098	  -0.993435485621
19    6    0   	  -2.080959280246	   0.916204323847	  -0.075864879176
20    1    0   	  -2.191915833083	  -1.759293754065	   0.508744528858
21    1    0   	  -0.877687893837	  -2.271716496529	  -0.500971846823
22    1    0   	  -1.727896446515	  -0.454367468078	  -1.577822300545
23    1    0   	  -0.156375451300	   1.332582755279	  -1.749201304445
24    1    0   	   0.609768943232	  -0.236450372006	  -1.493821895623
25    6    0   	  -4.380001569394	   1.238518587964	  -0.787185856835
26    6    0   	  -4.559366697385	  -0.217234310745	  -1.112832598387
27    6    0   	  -2.896061607855	   1.728080407233	  -0.993093789430
28    1    0   	  -4.980838408417	   1.857786220643	  -1.459829457626
29    1    0   	  -4.695401385556	   1.476728010343	   0.230634306911
30    1    0   	  -4.488286385509	  -0.466180358097	  -2.171638532518
31    1    0   	  -2.842550482432	   2.791007880856	  -0.738971194032
32    1    0   	  -2.612344832613	   1.568051824780	  -2.036504500160
33    6    0   	  -4.800435880944	  -1.213089531451	  -0.249957753326
34    1    0   	  -0.689724474975	  -2.393942002122	   2.089365115952
35    6    0   	  -4.943857977111	  -1.049205578759	   1.240733364226
36    1    0   	  -4.256095312931	  -1.723356846888	   1.765241812914
37    1    0   	  -4.766026032883	  -0.033163669296	   1.597402104074
38    1    0   	  -5.952648765724	  -1.339347014866	   1.552658478290
39    6    0   	  -4.971809650038	  -2.627213257331	  -0.736620569897
40    1    0   	  -5.961416431508	  -3.007330108851	  -0.462206919341
41    1    0   	  -4.863188944943	  -2.703366236493	  -1.819930714299
42    1    0   	  -4.238962310276	  -3.291529141546	  -0.263950142970
43    6    0   	  -1.997984132794	   1.320216144580	   1.323783289162
44    1    0   	  -2.697589580303	   2.112605794976	   1.589545470534
45    1    0   	  -2.056389545064	   0.475244188270	   2.014075368014
46    1    0   	  -0.956292242147	   1.711010420335	   1.410891900319
47    6    0   	   1.294192734841	   3.455395586951	  -0.733484043151
48    1    0   	   2.215591929612	   3.666025405538	  -1.288861996953
49    1    0   	   0.496028156989	   3.293629091432	  -1.460561308542
50    1    0   	   1.061435115018	   4.360220452299	  -0.162893268210
51    6    0   	   1.954239899568	  -1.759096204166	   2.590767225302
52    1    0   	   1.439900186754	  -2.310966567111	   3.384896952846
53    1    0   	   2.979319241536	  -2.123785425455	   2.544179116057
54    1    0   	   1.980625463394	  -0.706906849203	   2.907016667486
55    6    0   	   3.247600738901	  -2.457555101311	  -0.155578362064
56    6    0   	   3.762238640368	  -1.538925392644	  -1.272680664212
57    6    0   	   3.824603857848	  -0.049234126617	  -0.986376596411
58    1    0   	   3.379685560733	  -3.493169951935	  -0.490703304424
59    1    0   	   3.860484251466	  -2.346914247696	   0.741241419811
60    1    0   	   4.761557231044	  -1.870899863231	  -1.583563576700
61    1    0   	   3.127034282193	  -1.686159174315	  -2.158573432285
62    1    0   	   3.894739732724	  -0.225546686283	   1.094641718827
63    6    0   	   3.803161414794	   0.784234999302	  -2.242509278201
64    1    0   	   4.497163867261	   0.376464149713	  -2.982144348235
65    1    0   	   2.806775581600	   0.752113461785	  -2.699182713297
66    1    0   	   4.063914111097	   1.829574343954	  -2.083936294910
---------------------------------------------------------------------
SCF Done:  E(scf) =  -976.594209438724     A.U.


IRC-IRC-IRC-IRC-IRC-IRC-IRC-IRC-IRC-IRC-IRC-IRC-IRC-IRC-IRC-IRC-IRC-IRC
Pt  14  Step number   1 out of a maximum of  2639
NET REACTION COORDINATE UP TO THIS POINT =    14.00000
IRC-IRC-IRC-IRC-IRC-IRC-IRC-IRC-IRC-IRC-IRC-IRC-IRC-IRC-IRC-IRC-IRC-IRC
                         Input orientation:
---------------------------------------------------------------------
Center     Atomic      Atomic             Coordinates (Angstroms)
Number     Number       Type             X           Y           Z
---------------------------------------------------------------------
1     6    0   	  -0.271234463584	  -1.600172353572	   1.452780162494
2     6    0   	   1.209178863384	  -1.899625711875	   1.286595529959
3     6    0   	   2.619929535696	   2.441273317005	   1.207117162883
4     6    0   	   1.788945392886	  -2.216552946592	   0.125493280290
5     6    0   	   3.962325803830	   1.918053416622	   0.619452100215
6     6    0   	   3.907189887406	   0.461247320389	   0.247082682477
7     1    0   	   2.383665845359	   1.860028784025	   2.105486794204
8     1    0   	   4.734145255541	   2.072689848418	   1.380757755860
9     1    0   	   2.745964923189	   3.484848087737	   1.512131699415
10    1    0   	   4.242690076633	   2.540065527518	  -0.234322690008
11    1    0   	   1.161472765539	  -2.300016152200	  -0.763719406881
12    6    0   	   0.915046913891	   1.095314875280	   0.108542063340
13    1    0   	  -0.343403408782	  -0.691824816220	   2.065126721959
14    6    0   	   1.507554711243	   2.299498309864	   0.198170263682
15    1    0   	   1.243788758771	   0.347945744422	   0.820475851654
16    6    0   	  -1.311301691397	  -0.189092501688	  -0.602832826462
17    6    0   	  -1.169280653504	  -1.494660679259	   0.211068104185
18    6    0   	   0.066432116478	   0.580563205371	  -0.995604937068
19    6    0   	  -2.082650270078	   0.918463919226	  -0.076212934449
20    1    0   	  -2.191904271975	  -1.759247737429	   0.503028519159
21    1    0   	  -0.875302110338	  -2.267703386382	  -0.505446430621
22    1    0   	  -1.730016214095	  -0.450552048306	  -1.579591256395
23    1    0   	  -0.159484917474	   1.338437193727	  -1.749166074591
24    1    0   	   0.607075862707	  -0.231044998228	  -1.498924619592
25    6    0   	  -4.383277415192	   1.237536878533	  -0.783516901321
26    6    0   	  -4.561734869020	  -0.217926714202	  -1.110788663247
27    6    0   	  -2.900390992241	   1.729401717749	  -0.991849086945
28    1    0   	  -4.986354906546	   1.857010376141	  -1.453895665438
29    1    0   	  -4.696798474470	   1.473895328950	   0.235299673277
30    1    0   	  -4.493096533153	  -0.465350030420	  -2.170061838569
31    1    0   	  -2.848286886205	   2.792302667496	  -0.737371516403
32    1    0   	  -2.618364123143	   1.570213295243	  -2.035820888560
33    6    0   	  -4.799756618363	  -1.215154206890	  -0.248704071130
34    1    0   	  -0.692898213370	  -2.391146559856	   2.086844837157
35    6    0   	  -4.939466161160	  -1.053508047738	   1.242537467577
36    1    0   	  -4.249314218258	  -1.727435294379	   1.764148404508
37    1    0   	  -4.761998884321	  -0.037780705150	   1.600249282964
38    1    0   	  -5.946894204131	  -1.345635530856	   1.556831177110
39    6    0   	  -4.970614372401	  -2.628849566053	  -0.736774983349
40    1    0   	  -5.958319764898	  -3.011241784178	  -0.459049753533
41    1    0   	  -4.866120011994	  -2.703255969223	  -1.820521125405
42    1    0   	  -4.234741600032	  -3.292475112215	  -0.268064461996
43    6    0   	  -1.997812855956	   1.322587268136	   1.323286872599
44    1    0   	  -2.697089451608	   2.114979542883	   1.589898363424
45    1    0   	  -2.055428050063	   0.477675545868	   2.013713920492
46    1    0   	  -0.955933727106	   1.713147480834	   1.409295722580
47    6    0   	   1.291416430791	   3.459094620143	  -0.729945618676
48    1    0   	   2.211626145462	   3.671162932143	  -1.286630059491
49    1    0   	   0.491629609279	   3.299307470422	  -1.455648010902
50    1    0   	   1.059957711041	   4.362410022778	  -0.156553363835
51    6    0   	   1.950218883299	  -1.761646367263	   2.591810330287
52    1    0   	   1.434281771685	  -2.314959789934	   3.383867641012
53    1    0   	   2.975228301501	  -2.126626764404	   2.546317352859
54    1    0   	   1.976284029460	  -0.710141059012	   2.910254038898
55    6    0   	   3.247507640731	  -2.458064381814	  -0.153106489273
56    6    0   	   3.765743302376	  -1.542002916501	  -1.270447840391
57    6    0   	   3.830175766663	  -0.052067469439	  -0.986466297284
58    1    0   	   3.378444861074	  -3.494395751309	  -0.486455603834
59    1    0   	   3.859094789518	  -2.347126165497	   0.744574356498
60    1    0   	   4.765235079755	  -1.876015742248	  -1.578542117227
61    1    0   	   3.132392474869	  -1.689475679666	  -2.157666692010
62    1    0   	   3.887052423623	  -0.224741001731	   1.094894009959
63    6    0   	   3.816112463273	   0.778697553585	  -2.244648370975
64    1    0   	   4.501841508664	   0.357215572254	  -2.989457609411
65    1    0   	   2.813782555629	   0.760946873298	  -2.698002886105
66    1    0   	   4.094469395146	   1.821073824193	  -2.086135767280
---------------------------------------------------------------------
SCF Done:  E(scf) =  -976.594200263392     A.U.


IRC-IRC-IRC-IRC-IRC-IRC-IRC-IRC-IRC-IRC-IRC-IRC-IRC-IRC-IRC-IRC-IRC-IRC
Pt  15  Step number   1 out of a maximum of  2639
NET REACTION COORDINATE UP TO THIS POINT =    15.00000
IRC-IRC-IRC-IRC-IRC-IRC-IRC-IRC-IRC-IRC-IRC-IRC-IRC-IRC-IRC-IRC-IRC-IRC
                         Input orientation:
---------------------------------------------------------------------
Center     Atomic      Atomic             Coordinates (Angstroms)
Number     Number       Type             X           Y           Z
---------------------------------------------------------------------
1     6    0   	  -0.273226053827	  -1.598042242933	   1.449842462071
2     6    0   	   1.207082746808	  -1.899141249496	   1.285789689581
3     6    0   	   2.619673282239	   2.440988855305	   1.206852353624
4     6    0   	   1.788771860028	  -2.214499125935	   0.125205452311
5     6    0   	   3.960978064454	   1.917279892295	   0.617381544622
6     6    0   	   3.904335599597	   0.460409358951	   0.245727955032
7     1    0   	   2.383727655011	   1.858815927141	   2.104722127833
8     1    0   	   4.733912023677	   2.071447142889	   1.377722673829
9     1    0   	   2.746761754926	   3.484076359002	   1.513059949963
10    1    0   	   4.240785574234	   2.539043044860	  -0.236738354070
11    1    0   	   1.163075170155	  -2.295015109269	  -0.765558139254
12    6    0   	   0.913997967476	   1.097288189405	   0.106556494768
13    1    0   	  -0.345130590149	  -0.689554001308	   2.061987599923
14    6    0   	   1.506332992358	   2.301394385284	   0.198628702629
15    1    0   	   1.243434310212	   0.348137140501	   0.816345173314
16    6    0   	  -1.312960597836	  -0.185231783273	  -0.604977166549
17    6    0   	  -1.169617761694	  -1.491876608015	   0.206976082981
18    6    0   	   0.064194584660	   0.585150351806	  -0.997901203751
19    6    0   	  -2.084661194653	   0.921301690942	  -0.076487904042
20    1    0   	  -2.192220748108	  -1.758626635323	   0.496943780447
21    1    0   	  -0.873348573605	  -2.263148420957	  -0.510535497549
22    1    0   	  -1.732485790576	  -0.445917964150	  -1.581599669758
23    1    0   	  -0.162551894426	   1.344735140360	  -1.749514677509
24    1    0   	   0.604358658904	  -0.225212779566	  -1.503778376977
25    6    0   	  -4.387196303690	   1.236443105720	  -0.779117677278
26    6    0   	  -4.564275997864	  -0.218798773914	  -1.108077662429
27    6    0   	  -2.905530425160	   1.731158266147	  -0.990238673540
28    1    0   	  -4.992771586189	   1.855936159654	  -1.447257374470
29    1    0   	  -4.698771431925	   1.470918395615	   0.240754378656
30    1    0   	  -4.497998233605	  -0.464527534355	  -2.167905823982
31    1    0   	  -2.855033313596	   2.794040155997	  -0.735392913888
32    1    0   	  -2.625331678851	   1.572930028203	  -2.034854992286
33    6    0   	  -4.798828119006	  -1.217648153484	  -0.246887674168
34    1    0   	  -0.696421592851	  -2.388488393857	   2.083556967641
35    6    0   	  -4.934796765982	  -1.058441636560	   1.244989254599
36    1    0   	  -4.242497496633	  -1.732403885332	   1.763753793967
37    1    0   	  -4.757473125916	  -0.043053471734	   1.603754470177
38    1    0   	  -5.941071564016	  -1.352143200889	   1.561534940803
39    6    0   	  -4.969122178190	  -2.630832188895	  -0.736644300874
40    1    0   	  -5.955557978801	  -3.014975928363	  -0.456745907536
41    1    0   	  -4.867520143444	  -2.703439819609	  -1.820811378051
42    1    0   	  -4.231039393784	  -3.294200237880	  -0.270972824347
43    6    0   	  -1.997617146882	   1.325376722596	   1.322897399014
44    1    0   	  -2.696533015100	   2.117704944842	   1.590635284109
45    1    0   	  -2.054336905935	   0.480387173957	   2.013319137161
46    1    0   	  -0.955502061876	   1.715614312852	   1.407701430951
47    6    0   	   1.289231791984	   3.463103266990	  -0.726675491513
48    1    0   	   2.208523624018	   3.675554094838	  -1.284795318076
49    1    0   	   0.487886116420	   3.305400225169	  -1.451102164603
50    1    0   	   1.059625734370	   4.365462129227	  -0.150991675400
51    6    0   	   1.945772143744	  -1.764337443951	   2.592692890259
52    1    0   	   1.428050039566	  -2.318888456890	   3.382734595170
53    1    0   	   2.970655586909	  -2.129822227334	   2.548423674352
54    1    0   	   1.971834297848	  -0.713456372832	   2.913221703625
55    6    0   	   3.247473558367	  -2.458741416039	  -0.150476636155
56    6    0   	   3.769771748730	  -1.545570737589	  -1.268243561319
57    6    0   	   3.834739677359	  -0.055059353974	  -0.987407225879
58    1    0   	   3.377234412831	  -3.495853831081	  -0.481922155653
59    1    0   	   3.857555394452	  -2.347503555240	   0.748202394633
60    1    0   	   4.769908802917	  -1.881249593576	  -1.572418552060
61    1    0   	   3.139086196845	  -1.694504438533	  -2.157075762842
62    1    0   	   3.876717108025	  -0.224313533092	   1.094450820069
63    6    0   	   3.833492912079	   0.772207453105	  -2.247799643799
64    1    0   	   4.539833619018	   0.359479766936	  -2.975806378976
65    1    0   	   2.842958026680	   0.737623482585	  -2.721115606705
66    1    0   	   4.092729958726	   1.818627555161	  -2.088644804146
---------------------------------------------------------------------
SCF Done:  E(scf) =  -976.594184778211     A.U.


IRC-IRC-IRC-IRC-IRC-IRC-IRC-IRC-IRC-IRC-IRC-IRC-IRC-IRC-IRC-IRC-IRC-IRC
Pt  16  Step number   1 out of a maximum of  2639
NET REACTION COORDINATE UP TO THIS POINT =    16.00000
IRC-IRC-IRC-IRC-IRC-IRC-IRC-IRC-IRC-IRC-IRC-IRC-IRC-IRC-IRC-IRC-IRC-IRC
                         Input orientation:
---------------------------------------------------------------------
Center     Atomic      Atomic             Coordinates (Angstroms)
Number     Number       Type             X           Y           Z
---------------------------------------------------------------------
1     6    0   	  -0.275107892941	  -1.595784480538	   1.446960563163
2     6    0   	   1.205059011231	  -1.898679077242	   1.285095925495
3     6    0   	   2.619583738432	   2.440548246924	   1.206246115368
4     6    0   	   1.788655118881	  -2.212552217006	   0.125059924423
5     6    0   	   3.960034470323	   1.916642418498	   0.615234834436
6     6    0   	   3.902685567643	   0.459521400923	   0.244870235012
7     1    0   	   2.383938904158	   1.857469809345	   2.103623365464
8     1    0   	   4.733999846766	   2.071254991064	   1.374485818993
9     1    0   	   2.747494897581	   3.483186267128	   1.513612041351
10    1    0   	   4.238677137118	   2.537789658955	  -0.239699881384
11    1    0   	   1.164736127710	  -2.290155453029	  -0.767216828210
12    6    0   	   0.913266484905	   1.098941671364	   0.104091957654
13    1    0   	  -0.346626230062	  -0.687005229586	   2.058688045058
14    6    0   	   1.505328314776	   2.303010925571	   0.198696561042
15    1    0   	   1.243614321594	   0.347958930661	   0.811520381170
16    6    0   	  -1.314607214521	  -0.181485339691	  -0.607163726568
17    6    0   	  -1.169827700287	  -1.489136372238	   0.202908514608
18    6    0   	   0.061968816670	   0.589544924145	  -1.000479058331
19    6    0   	  -2.086565676904	   0.924100174716	  -0.076848446187
20    1    0   	  -2.192372833992	  -1.758135313368	   0.490851194671
21    1    0   	  -0.871174992503	  -2.258618401487	  -0.515545896474
22    1    0   	  -1.735045757004	  -0.441473882572	  -1.583583126873
23    1    0   	  -0.165697761375	   1.350879104913	  -1.750058732305
24    1    0   	   0.601324657305	  -0.219670609218	  -1.509061225327
25    6    0   	  -4.390985120956	   1.235331391862	  -0.774817875443
26    6    0   	  -4.566770600937	  -0.219659562617	  -1.105505702131
27    6    0   	  -2.910541242950	   1.732837829549	  -0.988731612841
28    1    0   	  -4.999023596178	   1.854877074396	  -1.440678749885
29    1    0   	  -4.700573722700	   1.467918322603	   0.246102767817
30    1    0   	  -4.502891209380	  -0.463679943684	  -2.165872498661
31    1    0   	  -2.861621776361	   2.795702842024	  -0.733557567938
32    1    0   	  -2.632196711782	   1.575509350419	  -2.033980423432
33    6    0   	  -4.797893339751	  -1.220119389966	  -0.245249436394
34    1    0   	  -0.699911647926	  -2.385501121653	   2.080505675850
35    6    0   	  -4.930103809869	  -1.063355655634	   1.247231135229
36    1    0   	  -4.235801563040	  -1.737469211120	   1.763131540707
37    1    0   	  -4.752743048259	  -0.048351460924	   1.607077093113
38    1    0   	  -5.935262292696	  -1.358473160921	   1.565997326824
39    6    0   	  -4.967683283425	  -2.632772322048	  -0.736710702273
40    1    0   	  -5.952759298643	  -3.018715948574	  -0.454514346862
41    1    0   	  -4.869155414787	  -2.703553476790	  -1.821280488684
42    1    0   	  -4.227322950641	  -3.295849123421	  -0.274241858252
43    6    0   	  -1.997256257009	   1.328220473941	   1.322388608772
44    1    0   	  -2.695722086858	   2.120580220872	   1.591192227791
45    1    0   	  -2.053201037606	   0.483201373636	   2.012854645924
46    1    0   	  -0.954869099683	   1.718003791648	   1.405991540818
47    6    0   	   1.286808231658	   3.467038093332	  -0.723345884875
48    1    0   	   2.205239914123	   3.680830951727	  -1.282350195417
49    1    0   	   0.484302960416	   3.311193897714	  -1.446892392902
50    1    0   	   1.058163227931	   4.367945952421	  -0.145031437195
51    6    0   	   1.941395800742	  -1.767000587898	   2.593648444424
52    1    0   	   1.421891756119	  -2.322735965618	   3.381690037356
53    1    0   	   2.966135763313	  -2.133025578868	   2.550586521410
54    1    0   	   1.967483469198	  -0.716741447829	   2.916211990171
55    6    0   	   3.247462624404	  -2.459442848704	  -0.147808982355
56    6    0   	   3.773567255590	  -1.548974236539	  -1.265901026625
57    6    0   	   3.839825087863	  -0.058068018596	  -0.987722633257
58    1    0   	   3.376066475112	  -3.497287835598	  -0.477458846484
59    1    0   	   3.856121827095	  -2.347921307710	   0.751811751320
60    1    0   	   4.774041080253	  -1.886504726230	  -1.566929238409
61    1    0   	   3.144966229568	  -1.698661035966	  -2.156093648754
62    1    0   	   3.868566944675	  -0.223831856151	   1.094506603118
63    6    0   	   3.848360108520	   0.766303752637	  -2.249978578309
64    1    0   	   4.560708816852	   0.351833878884	  -2.971609840024
65    1    0   	   2.861503690282	   0.730201174129	  -2.731377847486
66    1    0   	   4.106220130128	   1.813199161404	  -2.090923926792
---------------------------------------------------------------------
SCF Done:  E(scf) =  -976.594167210143     A.U.


IRC-IRC-IRC-IRC-IRC-IRC-IRC-IRC-IRC-IRC-IRC-IRC-IRC-IRC-IRC-IRC-IRC-IRC
Pt  17  Step number   1 out of a maximum of  2639
NET REACTION COORDINATE UP TO THIS POINT =    17.00000
IRC-IRC-IRC-IRC-IRC-IRC-IRC-IRC-IRC-IRC-IRC-IRC-IRC-IRC-IRC-IRC-IRC-IRC
                         Input orientation:
---------------------------------------------------------------------
Center     Atomic      Atomic             Coordinates (Angstroms)
Number     Number       Type             X           Y           Z
---------------------------------------------------------------------
1     6    0   	  -0.277298080176	  -1.592972661842	   1.443404174238
2     6    0   	   1.202671668195	  -1.898150882142	   1.284241029188
3     6    0   	   2.619366083109	   2.439980699525	   1.205431390455
4     6    0   	   1.788623507572	  -2.210214113440	   0.124897321369
5     6    0   	   3.958830213370	   1.915821162459	   0.612701993584
6     6    0   	   3.900656749036	   0.458400191644	   0.243873194923
7     1    0   	   2.383996775671	   1.855810942934	   2.102191879846
8     1    0   	   4.733961761698	   2.070910795535	   1.370730637015
9     1    0   	   2.748248722966	   3.482070011675	   1.514211074452
10    1    0   	   4.236236700956	   2.536263254256	  -0.243134762778
11    1    0   	   1.166915041985	  -2.284216804675	  -0.769233162275
12    6    0   	   0.912429015312	   1.100895100399	   0.100835078347
13    1    0   	  -0.348283585754	  -0.683800026685	   2.054571732682
14    6    0   	   1.504076636332	   2.304939953951	   0.198619363502
15    1    0   	   1.243920428565	   0.347651692084	   0.805327266289
16    6    0   	  -1.316569984445	  -0.176909052322	  -0.609903014365
17    6    0   	  -1.169970339148	  -1.485765008817	   0.197895249856
18    6    0   	   0.059268275237	   0.594894512723	  -1.003843218784
19    6    0   	  -2.088819378972	   0.927515718593	  -0.077300652897
20    1    0   	  -2.192422670890	  -1.757542447517	   0.483363243872
21    1    0   	  -0.868380381010	  -2.253054029978	  -0.521684489592
22    1    0   	  -1.738223993047	  -0.436080837036	  -1.586020561863
23    1    0   	  -0.169583547616	   1.358380631971	  -1.750888902106
24    1    0   	   0.597639687803	  -0.212873835855	  -1.515792043099
25    6    0   	  -4.395559833960	   1.234036677506	  -0.769445235557
26    6    0   	  -4.569824095164	  -0.220624016411	  -1.102292249325
27    6    0   	  -2.916622165526	   1.734898337660	  -0.986832882519
28    1    0   	  -5.006599950000	   1.853672649891	  -1.432475543103
29    1    0   	  -4.702651913703	   1.464309709144	   0.252763016114
30    1    0   	  -4.508902435632	  -0.462521195955	  -2.163314339588
31    1    0   	  -2.869565023062	   2.797732738385	  -0.731244709982
32    1    0   	  -2.640606594015	   1.578663519301	  -2.032862636693
33    6    0   	  -4.796755877077	  -1.223073413903	  -0.243231417004
34    1    0   	  -0.704107735189	  -2.381733148115	   2.076789635599
35    6    0   	  -4.924349090447	  -1.069335345132	   1.249970693316
36    1    0   	  -4.227731394817	  -1.743750285221	   1.762352343675
37    1    0   	  -4.746783892021	  -0.054839969737	   1.611167758024
38    1    0   	  -5.928190520989	  -1.366026212743	   1.571414306018
39    6    0   	  -4.966005981593	  -2.635041548308	  -0.736839792142
40    1    0   	  -5.949457402032	  -3.023122172778	  -0.451916070764
41    1    0   	  -4.871184816074	  -2.703558778187	  -1.821884472187
42    1    0   	  -4.222950837662	  -3.297821890446	  -0.278271826517
43    6    0   	  -1.996683469716	   1.331683888445	   1.321747264933
44    1    0   	  -2.694571723871	   2.124093701044	   1.591879960587
45    1    0   	  -2.051679661745	   0.486624593734	   2.012262530785
46    1    0   	  -0.953951730685	   1.720878566067	   1.403848315827
47    6    0   	   1.283756763143	   3.471821429149	  -0.719386707405
48    1    0   	   2.201051102785	   3.687082410535	  -1.279713309758
49    1    0   	   0.479662616531	   3.318301612563	  -1.441660148111
50    1    0   	   1.056533539861	   4.371010022258	  -0.137851502992
51    6    0   	   1.936104092538	  -1.770341257969	   2.594808213900
52    1    0   	   1.414413533940	  -2.327520005552	   3.380382271520
53    1    0   	   2.960657520380	  -2.137048544915	   2.553219353782
54    1    0   	   1.962244974280	  -0.720855836532	   2.919878131460
55    6    0   	   3.247552170029	  -2.460352748993	  -0.144495111054
56    6    0   	   3.778317452450	  -1.553161242977	  -1.262940348367
57    6    0   	   3.845783183254	  -0.061749962975	  -0.988013480255
58    1    0   	   3.374748744449	  -3.499076509379	  -0.471975689923
59    1    0   	   3.854443814452	  -2.348493851872	   0.756288606310
60    1    0   	   4.779287676833	  -1.892778638179	  -1.559942344898
61    1    0   	   3.152419437671	  -1.703975447350	  -2.154836674060
62    1    0   	   3.858940110059	  -0.223298020609	   1.094568552372
63    6    0   	   3.866009063177	   0.759172371605	  -2.252342047125
64    1    0   	   4.587916447209	   0.345065641904	  -2.964357842067
65    1    0   	   2.885167138961	   0.718183430400	  -2.744857899951
66    1    0   	   4.118556390712	   1.807292593898	  -2.093542860533
---------------------------------------------------------------------
SCF Done:  E(scf) =  -976.594144418876     A.U.


IRC-IRC-IRC-IRC-IRC-IRC-IRC-IRC-IRC-IRC-IRC-IRC-IRC-IRC-IRC-IRC-IRC-IRC
Pt  18  Step number   1 out of a maximum of  2639
NET REACTION COORDINATE UP TO THIS POINT =    18.00000
IRC-IRC-IRC-IRC-IRC-IRC-IRC-IRC-IRC-IRC-IRC-IRC-IRC-IRC-IRC-IRC-IRC-IRC
                         Input orientation:
---------------------------------------------------------------------
Center     Atomic      Atomic             Coordinates (Angstroms)
Number     Number       Type             X           Y           Z
---------------------------------------------------------------------
1     6    0   	  -0.279236204969	  -1.590251676643	   1.440147657794
2     6    0   	   1.200517325354	  -1.897667611074	   1.283491597405
3     6    0   	   2.619067519235	   2.439431896199	   1.204522085352
4     6    0   	   1.788656864482	  -2.208034591597	   0.124793181893
5     6    0   	   3.957602777756	   1.915087631962	   0.610137019467
6     6    0   	   3.898778176277	   0.457342152416	   0.242902888218
7     1    0   	   2.384021692340	   1.854243397604	   2.100724361025
8     1    0   	   4.733873546234	   2.070816543625	   1.366928477859
9     1    0   	   2.748835464937	   3.481010757970	   1.514613702293
10    1    0   	   4.233662754374	   2.534777862772	  -0.246670171948
11    1    0   	   1.169023070759	  -2.278623701826	  -0.771055870065
12    6    0   	   0.911671609799	   1.102603935937	   0.097583618374
13    1    0   	  -0.349626145445	  -0.680620402446	   2.050665332313
14    6    0   	   1.502734527379	   2.306702352528	   0.198485400818
15    1    0   	   1.244461081463	   0.347182487556	   0.799122364514
16    6    0   	  -1.318450076613	  -0.172705147564	  -0.612425365458
17    6    0   	  -1.170037287571	  -1.482634768492	   0.193295545991
18    6    0   	   0.056648760175	   0.599838642302	  -1.007108276765
19    6    0   	  -2.090901224707	   0.930676680171	  -0.077681865008
20    1    0   	  -2.192366730725	  -1.757062153595	   0.476481312336
21    1    0   	  -0.865670741803	  -2.247873716254	  -0.527302663099
22    1    0   	  -1.741328232085	  -0.431164719814	  -1.588207102067
23    1    0   	  -0.173412154920	   1.365368869325	  -1.751702068230
24    1    0   	   0.594063398429	  -0.206513239110	  -1.522317813281
25    6    0   	  -4.399788439372	   1.232902864674	  -0.764379077065
26    6    0   	  -4.572707580940	  -0.221419677209	  -1.099306560604
27    6    0   	  -2.922249921945	   1.736814473330	  -0.985008461804
28    1    0   	  -5.013602813592	   1.852672498425	  -1.424720860875
29    1    0   	  -4.704512343302	   1.460989422621	   0.259035498793
30    1    0   	  -4.514604817177	  -0.461291470038	  -2.160940189404
31    1    0   	  -2.876865746376	   2.799616117721	  -0.729039487195
32    1    0   	  -2.648433391637	   1.581574922129	  -2.031763283539
33    6    0   	  -4.795705285094	  -1.225750390068	  -0.241410826000
34    1    0   	  -0.707941006238	  -2.377997002443	   2.073511325832
35    6    0   	  -4.918925909523	  -1.074886156648	   1.252454565140
36    1    0   	  -4.220217423767	  -1.749667949268	   1.761499192705
37    1    0   	  -4.741048410665	  -0.060902657394	   1.614951042134
38    1    0   	  -5.921551492326	  -1.372957506307	   1.576403631895
39    6    0   	  -4.964494337576	  -2.637051662744	  -0.737075793189
40    1    0   	  -5.946378193946	  -3.027162494570	  -0.449532536009
41    1    0   	  -4.873251013540	  -2.703403818262	  -1.822559005005
42    1    0   	  -4.218877643928	  -3.299553186709	  -0.282271650672
43    6    0   	  -1.996056516728	   1.334944015598	   1.321163518651
44    1    0   	  -2.693360244854	   2.127441760368	   1.592526372500
45    1    0   	  -2.050170582590	   0.489883427996	   2.011767046454
46    1    0   	  -0.952984516095	   1.723548809821	   1.401799522675
47    6    0   	   1.280287886304	   3.476416993501	  -0.715391285504
48    1    0   	   2.196412875382	   3.693594199155	  -1.276892416978
49    1    0   	   0.474748544840	   3.324976246312	  -1.436488865339
50    1    0   	   1.054059946059	   4.373715767807	  -0.130572873032
51    6    0   	   1.931245727797	  -1.773516468499	   2.595919938505
52    1    0   	   1.407517886834	  -2.332046058887	   3.379173695282
53    1    0   	   2.955613707515	  -2.140881954010	   2.555683443902
54    1    0   	   1.957453571587	  -0.724768929784	   2.923354687918
55    6    0   	   3.247675840442	  -2.461242148740	  -0.141364448947
56    6    0   	   3.782816031902	  -1.557149463999	  -1.260126302668
57    6    0   	   3.851563141221	  -0.065288806970	  -0.988236789567
58    1    0   	   3.373523128712	  -3.500789035537	  -0.466802383726
59    1    0   	   3.852928195085	  -2.349056182494	   0.760492770122
60    1    0   	   4.784202855927	  -1.898776874672	  -1.553399860749
61    1    0   	   3.159417123216	  -1.708950095003	  -2.153602872132
62    1    0   	   3.849833260368	  -0.222722688980	   1.094584162971
63    6    0   	   3.882791429140	   0.752393125105	  -2.254429770055
64    1    0   	   4.611734456563	   0.337028094829	  -2.958590265110
65    1    0   	   2.906626858936	   0.709090200499	  -2.755939102976
66    1    0   	   4.132965458993	   1.801126250627	  -2.095974907837
---------------------------------------------------------------------
SCF Done:  E(scf) =  -976.594120752279     A.U.


IRC-IRC-IRC-IRC-IRC-IRC-IRC-IRC-IRC-IRC-IRC-IRC-IRC-IRC-IRC-IRC-IRC-IRC
Pt  19  Step number   1 out of a maximum of  2639
NET REACTION COORDINATE UP TO THIS POINT =    19.00000
IRC-IRC-IRC-IRC-IRC-IRC-IRC-IRC-IRC-IRC-IRC-IRC-IRC-IRC-IRC-IRC-IRC-IRC
                         Input orientation:
---------------------------------------------------------------------
Center     Atomic      Atomic             Coordinates (Angstroms)
Number     Number       Type             X           Y           Z
---------------------------------------------------------------------
1     6    0   	  -0.281058837586	  -1.587448028972	   1.436984641553
2     6    0   	   1.198448883642	  -1.897190173888	   1.282770135201
3     6    0   	   2.618632247874	   2.438859261361	   1.203523879826
4     6    0   	   1.788738654889	  -2.205887865254	   0.124708916570
5     6    0   	   3.956221140212	   1.914351394860	   0.607434832912
6     6    0   	   3.896755639173	   0.456279282586	   0.241808375881
7     1    0   	   2.383962997101	   1.852653320797	   2.099182499855
8     1    0   	   4.733654843181	   2.070735647907	   1.362958323248
9     1    0   	   2.749280442902	   3.479927322960	   1.514920665942
10    1    0   	   4.230896897062	   2.533286633203	  -0.250353039811
11    1    0   	   1.171164605975	  -2.273070232971	  -0.772828211751
12    6    0   	   0.910905570751	   1.104196330051	   0.094184489452
13    1    0   	  -0.350749314143	  -0.677279149631	   2.046746035622
14    6    0   	   1.501190770486	   2.308423532840	   0.198334729758
15    1    0   	   1.245194654290	   0.346559371209	   0.792608404780
16    6    0   	  -1.320410000014	  -0.168577748553	  -0.614858138775
17    6    0   	  -1.170081687255	  -1.479522563007	   0.188844210080
18    6    0   	   0.053945060134	   0.604660829237	  -1.010434797106
19    6    0   	  -2.092955185109	   0.933832004724	  -0.077994643717
20    1    0   	  -2.192247708803	  -1.756624266853	   0.469828615611
21    1    0   	  -0.862956633608	  -2.242729004421	  -0.532744379739
22    1    0   	  -1.744588367805	  -0.426379370144	  -1.590254044355
23    1    0   	  -0.177335745399	   1.372180546162	  -1.752612079891
24    1    0   	   0.590330839191	  -0.200338746468	  -1.528848673765
25    6    0   	  -4.403952469317	   1.231851108764	  -0.759287361364
26    6    0   	  -4.575582662915	  -0.222111159647	  -1.096340287916
27    6    0   	  -2.927802459980	   1.738741774006	  -0.983130320297
28    1    0   	  -5.020502235763	   1.851788673614	  -1.416922808764
29    1    0   	  -4.706298357332	   1.457740592232	   0.265327450386
30    1    0   	  -4.520312421531	  -0.459930410430	  -2.158581018217
31    1    0   	  -2.884034824875	   2.801510235342	  -0.726800139905
32    1    0   	  -2.656183141385	   1.584460531710	  -2.030599182295
33    6    0   	  -4.794653012814	  -1.228337099036	  -0.239651032436
34    1    0   	  -0.711649535589	  -2.374073506806	   2.070455529953
35    6    0   	  -4.913500407282	  -1.080373579458	   1.254862571367
36    1    0   	  -4.212787674662	  -1.755595595898	   1.760560321117
37    1    0   	  -4.735211900673	  -0.066930155622	   1.618684328841
38    1    0   	  -5.914938675563	  -1.379734722037	   1.581286774105
39    6    0   	  -4.963002392503	  -2.638952147595	  -0.737410334942
40    1    0   	  -5.943292062750	  -3.031112975033	  -0.447231136355
41    1    0   	  -4.875383673527	  -2.703107348044	  -1.823321392088
42    1    0   	  -4.214813851270	  -3.301172323053	  -0.286429784020
43    6    0   	  -1.995318671755	   1.338276296743	   1.320613965375
44    1    0   	  -2.691988367044	   2.130910048634	   1.593188292509
45    1    0   	  -2.048549783579	   0.493262648578	   2.011363279111
46    1    0   	  -0.951886536677	   1.726253585069	   1.399705138613
47    6    0   	   1.276262946194	   3.481110719545	  -0.711118840594
48    1    0   	   2.191216050694	   3.700738146481	  -1.273610522903
49    1    0   	   0.469436368325	   3.331588388033	  -1.431173057733
50    1    0   	   1.050583183002	   4.376268872219	  -0.122804900436
51    6    0   	   1.926522179598	  -1.776690623606	   2.597016870691
52    1    0   	   1.400763286073	  -2.336512214567	   3.377981765348
53    1    0   	   2.950681853989	  -2.144768746301	   2.558106299920
54    1    0   	   1.952858163346	  -0.728676495636	   2.926779652533
55    6    0   	   3.247832797664	  -2.462168904056	  -0.138243272864
56    6    0   	   3.787369566674	  -1.561203137845	  -1.257316837082
57    6    0   	   3.857379823708	  -0.068886744807	  -0.988515055222
58    1    0   	   3.372315320700	  -3.502535652854	  -0.461633908714
59    1    0   	   3.851458034117	  -2.349646114033	   0.764674118770
60    1    0   	   4.789179919400	  -1.904836576422	  -1.546781727212
61    1    0   	   3.166531703800	  -1.714052249831	  -2.152393006799
62    1    0   	   3.840417972422	  -0.222109956544	   1.094431182269
63    6    0   	   3.900064467109	   0.745476615184	  -2.256488377342
64    1    0   	   4.636904529340	   0.329414751050	  -2.951987665211
65    1    0   	   2.929222205436	   0.699068553778	  -2.767814645740
66    1    0   	   4.146921939919	   1.795009019328	  -2.098306069474
---------------------------------------------------------------------
SCF Done:  E(scf) =  -976.594094214356     A.U.


IRC-IRC-IRC-IRC-IRC-IRC-IRC-IRC-IRC-IRC-IRC-IRC-IRC-IRC-IRC-IRC-IRC-IRC
Pt  20  Step number   1 out of a maximum of  2639
NET REACTION COORDINATE UP TO THIS POINT =    20.00000
IRC-IRC-IRC-IRC-IRC-IRC-IRC-IRC-IRC-IRC-IRC-IRC-IRC-IRC-IRC-IRC-IRC-IRC
                         Input orientation:
---------------------------------------------------------------------
Center     Atomic      Atomic             Coordinates (Angstroms)
Number     Number       Type             X           Y           Z
---------------------------------------------------------------------
1     6    0   	  -0.282688680303	  -1.584664187902	   1.434066990752
2     6    0   	   1.196550134520	  -1.896734576562	   1.282113001009
3     6    0   	   2.618115006131	   2.438265429912	   1.202457661879
4     6    0   	   1.788840929780	  -2.203887857585	   0.124649780215
5     6    0   	   3.954822543731	   1.913628647821	   0.604771982552
6     6    0   	   3.894815916156	   0.455234562262	   0.240706630197
7     1    0   	   2.383815967065	   1.851103726200	   2.097609807151
8     1    0   	   4.733348616936	   2.070694741395	   1.359086780915
9     1    0   	   2.749579187295	   3.478851272056	   1.515086824792
10    1    0   	   4.228154724412	   2.531826287909	  -0.253967986754
11    1    0   	   1.173206492879	  -2.267836435824	  -0.774462944448
12    6    0   	   0.910229674068	   1.105581115905	   0.090707747635
13    1    0   	  -0.351589437331	  -0.673891911049	   2.042984805800
14    6    0   	   1.499587354465	   2.310000996125	   0.198104562188
15    1    0   	   1.246163051174	   0.345787734073	   0.785984831428
16    6    0   	  -1.322348881555	  -0.164699269577	  -0.617100654813
17    6    0   	  -1.170113508674	  -1.476548119923	   0.184755182622
18    6    0   	   0.051305053208	   0.609118978317	  -1.013728744031
19    6    0   	  -2.094874416687	   0.936860175818	  -0.078238877547
20    1    0   	  -2.192090139487	  -1.756198211806	   0.463733801801
21    1    0   	  -0.860398332557	  -2.237854356947	  -0.537743207597
22    1    0   	  -1.747862003844	  -0.421935962798	  -1.592068529127
23    1    0   	  -0.181153240664	   1.378474617596	  -1.753645937731
24    1    0   	   0.586594466527	  -0.194689447344	  -1.535142335509
25    6    0   	  -4.407858969300	   1.230904344887	  -0.754428440317
26    6    0   	  -4.578292572359	  -0.222697496562	  -1.093543114781
27    6    0   	  -2.933025609247	   1.740598961463	  -0.981300285476
28    1    0   	  -5.026981923056	   1.851024408795	  -1.409476655410
29    1    0   	  -4.707941885233	   1.454690655564	   0.271321473742
30    1    0   	  -4.525717126231	  -0.458542480555	  -2.156356621689
31    1    0   	  -2.890774231121	   2.803336494122	  -0.724644227788
32    1    0   	  -2.663494958741	   1.587202354380	  -2.029439444261
33    6    0   	  -4.793633684390	  -1.230737125073	  -0.238035861888
34    1    0   	  -0.715079045443	  -2.370099552318	   2.067783726551
35    6    0   	  -4.908335540376	  -1.085551349531	   1.257079626973
36    1    0   	  -4.205786403664	  -1.761245618157	   1.759593709259
37    1    0   	  -4.729585907553	  -0.072643212551	   1.622182773852
38    1    0   	  -5.908667823931	  -1.386073706630	   1.585826729370
39    6    0   	  -4.961563628459	  -2.640686977102	  -0.737813582768
40    1    0   	  -5.940324271642	  -3.034814480097	  -0.445142171459
41    1    0   	  -4.877394752760	  -2.702735359637	  -1.824120003314
42    1    0   	  -4.210932906790	  -3.302632015525	  -0.290488134648
43    6    0   	  -1.994492235875	   1.341550688889	   1.320111922171
44    1    0   	  -2.690497066626	   2.134372523644	   1.593820597515
45    1    0   	  -2.046901784089	   0.496627731709	   2.011054006505
46    1    0   	  -0.950690579931	   1.728868300708	   1.397659834489
47    6    0   	   1.271870315534	   3.485732622683	  -0.706710419992
48    1    0   	   2.185864915274	   3.708805848938	  -1.269424327563
49    1    0   	   0.464389953902	   3.337710388539	  -1.426340400364
50    1    0   	   1.045596536855	   4.378359570948	  -0.114755257627
51    6    0   	   1.922151244856	  -1.779694594927	   2.598045713806
52    1    0   	   1.394448260677	  -2.340654067149	   3.376878492609
53    1    0   	   2.946078813823	  -2.148536854027	   2.560377924570
54    1    0   	   1.948702736976	  -0.732365794542	   2.929961336537
55    6    0   	   3.247989939214	  -2.463106610289	  -0.135285358162
56    6    0   	   3.791734258024	  -1.565123186163	  -1.254632223262
57    6    0   	   3.862970731005	  -0.072376702868	  -0.988779893321
58    1    0   	   3.371149804329	  -3.504245303001	  -0.456744794659
59    1    0   	   3.850078702217	  -2.350279086601	   0.768631403534
60    1    0   	   4.793936636300	  -1.910680236634	  -1.540437596972
61    1    0   	   3.173362514381	  -1.718978953665	  -2.151238351475
62    1    0   	   3.831408058687	  -0.221531757179	   1.094185806264
63    6    0   	   3.916735799483	   0.738778780971	  -2.258372153426
64    1    0   	   4.661302037073	   0.322211652018	  -2.945364663797
65    1    0   	   2.951184794962	   0.689170026376	  -2.779262456435
66    1    0   	   4.160155907192	   1.789129722369	  -2.100440765395
---------------------------------------------------------------------
SCF Done:  E(scf) =  -976.594066419302     A.U.


IRC-IRC-IRC-IRC-IRC-IRC-IRC-IRC-IRC-IRC-IRC-IRC-IRC-IRC-IRC-IRC-IRC-IRC
Pt  21  Step number   1 out of a maximum of  2639
NET REACTION COORDINATE UP TO THIS POINT =    21.00000
IRC-IRC-IRC-IRC-IRC-IRC-IRC-IRC-IRC-IRC-IRC-IRC-IRC-IRC-IRC-IRC-IRC-IRC
                         Input orientation:
---------------------------------------------------------------------
Center     Atomic      Atomic             Coordinates (Angstroms)
Number     Number       Type             X           Y           Z
---------------------------------------------------------------------
1     6    0   	  -0.284455622480	  -1.581315879289	   1.430796116762
2     6    0   	   1.194423829080	  -1.896220595349	   1.281382913343
3     6    0   	   2.617442512205	   2.437491190592	   1.201064969799
4     6    0   	   1.788979476881	  -2.201643626220	   0.124610237186
5     6    0   	   3.953204209249	   1.912739658988	   0.601689860521
6     6    0   	   3.892604702726	   0.453989707913	   0.239365860810
7     1    0   	   2.383507969666	   1.849250710277	   2.095630077154
8     1    0   	   4.732894832209	   2.070565284841	   1.354704729896
9     1    0   	   2.749783559728	   3.477529131166	   1.515103230529
10    1    0   	   4.225090892278	   2.530116426219	  -0.258088460461
11    1    0   	   1.175575165377	  -2.261865197474	  -0.776276016268
12    6    0   	   0.909528475224	   1.107041093846	   0.086328392467
13    1    0   	  -0.352284406243	  -0.669736357879	   2.038585936621
14    6    0   	   1.497703483648	   2.311706069814	   0.197626621799
15    1    0   	   1.247531491590	   0.344714093154	   0.777776694781
16    6    0   	  -1.324761472650	  -0.160257314978	  -0.619560534262
17    6    0   	  -1.170137217868	  -1.473090086537	   0.180190129247
18    6    0   	   0.048081191912	   0.614175524624	  -1.017677781169
19    6    0   	  -2.097084520121	   0.940415205080	  -0.078432320414
20    1    0   	  -2.191831123432	  -1.755761673840	   0.456921886974
21    1    0   	  -0.857423060008	  -2.232172027337	  -0.543354542755
22    1    0   	  -1.751916239223	  -0.416908157705	  -1.593964454171
23    1    0   	  -0.185757168927	   1.385569800306	  -1.755032707957
24    1    0   	   0.581686955557	  -0.188496926147	  -1.542517178562
25    6    0   	  -4.412308408559	   1.229829400511	  -0.748803460062
26    6    0   	  -4.581376318904	  -0.223336481423	  -1.090333754289
27    6    0   	  -2.939019964753	   1.742767892554	  -0.979125562447
28    1    0   	  -5.034380952406	   1.850156465180	  -1.400844401470
29    1    0   	  -4.709778973940	   1.451172113932	   0.278237357973
30    1    0   	  -4.531921459509	  -0.456887969720	  -2.153788526790
31    1    0   	  -2.898522323988	   2.805472260868	  -0.722131517668
32    1    0   	  -2.671885704209	   1.590345673479	  -2.028017338477
33    6    0   	  -4.792413965171	  -1.233469693659	  -0.236237221468
34    1    0   	  -0.718942942793	  -2.365213745932	   2.064965943438
35    6    0   	  -4.902344700356	  -1.091501680632	   1.259537000857
36    1    0   	  -4.197716870042	  -1.767745857199	   1.758367775010
37    1    0   	  -4.723042184019	  -0.079224931283	   1.626134591075
38    1    0   	  -5.901396118428	  -1.393359419985	   1.590932929352
39    6    0   	  -4.959838766487	  -2.642640376606	  -0.738364637349
40    1    0   	  -5.936769601833	  -3.039103979191	  -0.442787907671
41    1    0   	  -4.879719320982	  -2.702239560779	  -1.825099516004
42    1    0   	  -4.206353186846	  -3.304212819424	  -0.295334794923
43    6    0   	  -1.993409333960	   1.345503527263	   1.319573106768
44    1    0   	  -2.688568173481	   2.138620720999	   1.594550284546
45    1    0   	  -2.044937485929	   0.500739689566	   2.010799109584
46    1    0   	  -0.949159715437	   1.731971940555	   1.395285161255
47    6    0   	   1.266395568411	   3.491144691180	  -0.701363767077
48    1    0   	   2.179438151144	   3.719360076777	  -1.263494567286
49    1    0   	   0.458780478439	   3.344569248076	  -1.421135954400
50    1    0   	   1.038288185635	   4.380283892670	  -0.104888332819
51    6    0   	   1.917224510664	  -1.783161302043	   2.599200958689
52    1    0   	   1.387245932883	  -2.345295446951	   3.375625436141
53    1    0   	   2.940828572410	  -2.153022331352	   2.562945894024
54    1    0   	   1.944167237375	  -0.736609526990	   2.933513331079
55    6    0   	   3.248165547971	  -2.464215039584	  -0.131905652283
56    6    0   	   3.796718656318	  -1.569649568484	  -1.251535903532
57    6    0   	   3.869375081505	  -0.076422209309	  -0.989054554112
58    1    0   	   3.369799824823	  -3.506220131537	  -0.451172466324
59    1    0   	   3.848510841460	  -2.351034217733	   0.773136615365
60    1    0   	   4.799347215066	  -1.917403191696	  -1.533108371233
61    1    0   	   3.181196509647	  -1.724689681986	  -2.149880841784
62    1    0   	   3.821073023680	  -0.220896324266	   1.093701389494
63    6    0   	   3.936116991313	   0.731008398016	  -2.260279287401
64    1    0   	   4.690235650821	   0.314471531912	  -2.936718241850
65    1    0   	   2.977338101882	   0.676870769460	  -2.792757578068
66    1    0   	   4.174615234623	   1.782514169180	  -2.102638022272
---------------------------------------------------------------------
SCF Done:  E(scf) =  -976.594031762485     A.U.


IRC-IRC-IRC-IRC-IRC-IRC-IRC-IRC-IRC-IRC-IRC-IRC-IRC-IRC-IRC-IRC-IRC-IRC
Pt  22  Step number   1 out of a maximum of  2639
NET REACTION COORDINATE UP TO THIS POINT =    22.00000
IRC-IRC-IRC-IRC-IRC-IRC-IRC-IRC-IRC-IRC-IRC-IRC-IRC-IRC-IRC-IRC-IRC-IRC
                         Input orientation:
---------------------------------------------------------------------
Center     Atomic      Atomic             Coordinates (Angstroms)
Number     Number       Type             X           Y           Z
---------------------------------------------------------------------
1     6    0   	  -0.285800844976	  -1.578603891024	   1.428279680087
2     6    0   	   1.192776353111	  -1.895848652803	   1.280866482480
3     6    0   	   2.616958568085	   2.436808231859	   1.199936323615
4     6    0   	   1.789084881908	  -2.199948134229	   0.124629763870
5     6    0   	   3.952062556825	   1.912005266745	   0.599392761784
6     6    0   	   3.890986024543	   0.452990801446	   0.238390788872
7     1    0   	   2.383248274044	   1.847697345520	   2.094009980838
8     1    0   	   4.732557800703	   2.070348634464	   1.351523465973
9     1    0   	   2.749923325661	   3.476413881525	   1.515119078319
10    1    0   	   4.223029823733	   2.528798697414	  -0.261095394511
11    1    0   	   1.177414115105	  -2.257230551545	  -0.777650047985
12    6    0   	   0.909089489628	   1.108106063586	   0.082725470034
13    1    0   	  -0.352715979920	  -0.666354548256	   2.035138918586
14    6    0   	   1.496327607250	   2.312968281046	   0.197142042633
15    1    0   	   1.248735710951	   0.343757795636	   0.771136681432
16    6    0   	  -1.326653721571	  -0.156733331314	  -0.621489606230
17    6    0   	  -1.170128024553	  -1.470313585843	   0.176657015592
18    6    0   	   0.045568395096	   0.618104271501	  -1.020894247053
19    6    0   	  -2.098787358053	   0.943269076553	  -0.078587999384
20    1    0   	  -2.191600323293	  -1.755359543698	   0.451652733412
21    1    0   	  -0.855065696064	  -2.227681487890	  -0.547689359384
22    1    0   	  -1.755148459823	  -0.412970468050	  -1.595417509520
23    1    0   	  -0.189341289527	   1.391080739649	  -1.756262450837
24    1    0   	   0.577754731732	  -0.183756379130	  -1.548405899785
25    6    0   	  -4.415810059371	   1.228998487696	  -0.744384225286
26    6    0   	  -4.583779708304	  -0.223824411451	  -1.087838454438
27    6    0   	  -2.943728977442	   1.744505681615	  -0.977420511319
28    1    0   	  -5.040196020520	   1.849497816722	  -1.394072425122
29    1    0   	  -4.711238533112	   1.448413388860	   0.283675660431
30    1    0   	  -4.536752546843	  -0.455548792594	  -2.151811149783
31    1    0   	  -2.904619209080	   2.807190742437	  -0.720183630824
32    1    0   	  -2.678475834384	   1.592836468534	  -2.026906377635
33    6    0   	  -4.791407697972	  -1.235630560521	  -0.234862965815
34    1    0   	  -0.721973706891	  -2.361233666768	   2.062858369917
35    6    0   	  -4.897613909023	  -1.096203949644	   1.261440661273
36    1    0   	  -4.191381370799	  -1.772901271480	   1.757406143886
37    1    0   	  -4.717869493837	  -0.084421832874	   1.629210957874
38    1    0   	  -5.895688446282	  -1.399068285698	   1.594891261723
39    6    0   	  -4.958412817499	  -2.644184989269	  -0.738858746366
40    1    0   	  -5.933918919487	  -3.042489567947	  -0.440998694515
41    1    0   	  -4.881473113396	  -2.701832691607	  -1.825947338356
42    1    0   	  -4.202668405126	  -3.305477323753	  -0.299203498013
43    6    0   	  -1.992472930416	   1.348684495072	   1.319143350957
44    1    0   	  -2.686931564615	   2.142061129557	   1.595130417823
45    1    0   	  -2.043341807835	   0.504043334101	   2.010591130252
46    1    0   	  -0.947846894021	   1.734424821926	   1.393399996860
47    6    0   	   1.262114335357	   3.495392378468	  -0.697186231716
48    1    0   	   2.174377205127	   3.727780894010	  -1.258888945010
49    1    0   	   0.454388556603	   3.349941455911	  -1.417059947941
50    1    0   	   1.032527569780	   4.381751392482	  -0.097079807653
51    6    0   	   1.913415530786	  -1.785945599080	   2.600157524642
52    1    0   	   1.381627117216	  -2.348942128281	   3.374729521227
53    1    0   	   2.936736360568	  -2.156686883380	   2.564983474737
54    1    0   	   1.940772974913	  -0.739989993352	   2.936323886245
55    6    0   	   3.248305773703	  -2.465133744140	  -0.129232007780
56    6    0   	   3.800515619425	  -1.573174969498	  -1.249101361910
57    6    0   	   3.874035357225	  -0.079549654278	  -0.989252435359
58    1    0   	   3.368775355248	  -3.507803990784	  -0.446826484456
59    1    0   	   3.847307740103	  -2.351686078369	   0.776678226688
60    1    0   	   4.803521033249	  -1.922521957601	  -1.527386811583
61    1    0   	   3.187208847315	  -1.729251176561	  -2.148769393638
62    1    0   	   3.813430936022	  -0.220462083509	   1.093438066120
63    6    0   	   3.950807701072	   0.725037873498	  -2.261713810262
64    1    0   	   4.714989714368	   0.311128629105	  -2.927753633937
65    1    0   	   2.999222606391	   0.664004930455	  -2.805067121569
66    1    0   	   4.181541361436	   1.778132606736	  -2.104575890243
---------------------------------------------------------------------
SCF Done:  E(scf) =  -976.594003068708     A.U.


IRC-IRC-IRC-IRC-IRC-IRC-IRC-IRC-IRC-IRC-IRC-IRC-IRC-IRC-IRC-IRC-IRC-IRC
Pt  23  Step number   1 out of a maximum of  2639
NET REACTION COORDINATE UP TO THIS POINT =    23.00000
IRC-IRC-IRC-IRC-IRC-IRC-IRC-IRC-IRC-IRC-IRC-IRC-IRC-IRC-IRC-IRC-IRC-IRC
                         Input orientation:
---------------------------------------------------------------------
Center     Atomic      Atomic             Coordinates (Angstroms)
Number     Number       Type             X           Y           Z
---------------------------------------------------------------------
1     6    0   	  -0.287132731707	  -1.575504309144	   1.425606392603
2     6    0   	   1.191071147344	  -1.895445500587	   1.280384657804
3     6    0   	   2.616483373087	   2.435940709296	   1.198628092685
4     6    0   	   1.789286322863	  -2.198066411322	   0.124733819031
5     6    0   	   3.950942131210	   1.911280781714	   0.596798456990
6     6    0   	   3.889800148074	   0.451892517768	   0.237496800746
7     1    0   	   2.383052365217	   1.845830250160	   2.092137661340
8     1    0   	   4.732353178329	   2.070673056939	   1.347795558744
9     1    0   	   2.750034417060	   3.475071202850	   1.515100527033
10    1    0   	   4.220416573369	   2.527277566906	  -0.264714381029
11    1    0   	   1.179532408029	  -2.252015435674	  -0.779043372245
12    6    0   	   0.908692479913	   1.109153961341	   0.078631755956
13    1    0   	  -0.352916353723	  -0.662383174588	   2.031238215904
14    6    0   	   1.494879721561	   2.314219338097	   0.196540906476
15    1    0   	   1.250223562997	   0.342559245682	   0.763566175548
16    6    0   	  -1.328734772029	  -0.152959178316	  -0.623560302770
17    6    0   	  -1.169992571864	  -1.467300254602	   0.172865235388
18    6    0   	   0.042745390863	   0.622413610569	  -1.024469792937
19    6    0   	  -2.100627517857	   0.946337990297	  -0.078778099531
20    1    0   	  -2.191177755094	  -1.755034511948	   0.445942679605
21    1    0   	  -0.852282610279	  -2.222752301839	  -0.552330082617
22    1    0   	  -1.758712729301	  -0.408791286817	  -1.596941800670
23    1    0   	  -0.193438528098	   1.397206534886	  -1.757523210487
24    1    0   	   0.573175816191	  -0.178512937159	  -1.555111831550
25    6    0   	  -4.419530638502	   1.228068123345	  -0.739720067805
26    6    0   	  -4.586317963143	  -0.224374499812	  -1.085246928861
27    6    0   	  -2.948777196030	   1.746347605615	  -0.975631435713
28    1    0   	  -5.046404720649	   1.848735341461	  -1.386847946032
29    1    0   	  -4.712761644343	   1.445391411398	   0.289418438822
30    1    0   	  -4.541908779188	  -0.454151549777	  -2.149747574073
31    1    0   	  -2.911185257305	   2.809008908977	  -0.718135882366
32    1    0   	  -2.685539710437	   1.595477223317	  -2.025740655313
33    6    0   	  -4.790298340303	  -1.237951203800	  -0.233491430978
34    1    0   	  -0.725209617691	  -2.356546582981	   2.060806574863
35    6    0   	  -4.892503098477	  -1.101248159101	   1.263343923698
36    1    0   	  -4.184442480346	  -1.778311066942	   1.756195091579
37    1    0   	  -4.712417963819	  -0.089982949986	   1.632381925290
38    1    0   	  -5.889445372335	  -1.405380872196	   1.599018480801
39    6    0   	  -4.956808082395	  -2.645848719621	  -0.739478358545
40    1    0   	  -5.930729238242	  -3.046188647906	  -0.439199369538
41    1    0   	  -4.883272627760	  -2.701428122485	  -1.826902169306
42    1    0   	  -4.198643586472	  -3.306768720872	  -0.303456230862
43    6    0   	  -1.991463264450	   1.352173233788	   1.318629641817
44    1    0   	  -2.685145068159	   2.145864435961	   1.595650122774
45    1    0   	  -2.041653386995	   0.507703909531	   2.010359264074
46    1    0   	  -0.946435916177	   1.737113191791	   1.391313819395
47    6    0   	   1.257470881371	   3.499879009694	  -0.692601048158
48    1    0   	   2.168663847343	   3.736351565623	  -1.254267445665
49    1    0   	   0.449179686297	   3.355945734837	  -1.412155776932
50    1    0   	   1.026937858316	   4.383264660634	  -0.088504060486
51    6    0   	   1.909314949525	  -1.789112532720	   2.601267914264
52    1    0   	   1.375542110268	  -2.353136228860	   3.373707877957
53    1    0   	   2.932323155186	  -2.160816359102	   2.567255331278
54    1    0   	   1.937086093499	  -0.743874574354	   2.939576038320
55    6    0   	   3.248503789700	  -2.466112010484	  -0.126301161277
56    6    0   	   3.804651820936	  -1.576947632695	  -1.246366970889
57    6    0   	   3.879421098057	  -0.082966212803	  -0.989183831527
58    1    0   	   3.367672465719	  -3.509490101783	  -0.442100760002
59    1    0   	   3.846075946481	  -2.352391417183	   0.780531688472
60    1    0   	   4.807957697126	  -1.928109236518	  -1.521273502993
61    1    0   	   3.193611679626	  -1.733873777179	  -2.147435858095
62    1    0   	   3.806249042148	  -0.219966087130	   1.093276435437
63    6    0   	   3.965344719975	   0.718747597228	  -2.262916872031
64    1    0   	   4.732711612938	   0.301419887389	  -2.924116140409
65    1    0   	   3.016235217799	   0.658926257777	  -2.811903157884
66    1    0   	   4.197800324421	   1.771689035216	  -2.105949561572
---------------------------------------------------------------------
SCF Done:  E(scf) =  -976.593973186490     A.U.


IRC-IRC-IRC-IRC-IRC-IRC-IRC-IRC-IRC-IRC-IRC-IRC-IRC-IRC-IRC-IRC-IRC-IRC
Pt  24  Step number   1 out of a maximum of  2639
NET REACTION COORDINATE UP TO THIS POINT =    24.00000
IRC-IRC-IRC-IRC-IRC-IRC-IRC-IRC-IRC-IRC-IRC-IRC-IRC-IRC-IRC-IRC-IRC-IRC
                         Input orientation:
---------------------------------------------------------------------
Center     Atomic      Atomic             Coordinates (Angstroms)
Number     Number       Type             X           Y           Z
---------------------------------------------------------------------
1     6    0   	  -0.288684664896	  -1.571565899422	   1.422318840588
2     6    0   	   1.189021359478	  -1.895005233313	   1.279838920895
3     6    0   	   2.615909846373	   2.434821914399	   1.197027471938
4     6    0   	   1.789608282712	  -2.195798805977	   0.124924881944
5     6    0   	   3.949531032937	   1.910320808455	   0.593541158299
6     6    0   	   3.888179407186	   0.450507495499	   0.236202656896
7     1    0   	   2.382842452531	   1.843410648293	   2.089801707377
8     1    0   	   4.732081889008	   2.070782235075	   1.343187748936
9     1    0   	   2.750224845016	   3.473332424861	   1.515170845521
10    1    0   	   4.217381328102	   2.525457474309	  -0.269092439407
11    1    0   	   1.182256119184	  -2.245556586666	  -0.780720712348
12    6    0   	   0.908220740840	   1.110499785579	   0.073470922516
13    1    0   	  -0.352972810940	  -0.657315209932	   2.026375126778
14    6    0   	   1.493058572380	   2.315817056502	   0.195860251091
15    1    0   	   1.252126761039	   0.341036912093	   0.753971441058
16    6    0   	  -1.331282638833	  -0.148218347237	  -0.626136157086
17    6    0   	  -1.169710239103	  -1.463479578608	   0.168171200754
18    6    0   	   0.039202621457	   0.627929395139	  -1.028976428738
19    6    0   	  -2.102891458241	   0.950180411369	  -0.079014242186
20    1    0   	  -2.190523407192	  -1.754578922627	   0.438862152826
21    1    0   	  -0.848694698419	  -2.216550083510	  -0.558055169124
22    1    0   	  -1.763116112835	  -0.403591852707	  -1.598817184763
23    1    0   	  -0.198667174441	   1.405049376795	  -1.759037661883
24    1    0   	   0.567416313967	  -0.171747141215	  -1.563667619767
25    6    0   	  -4.424113540584	   1.226920913546	  -0.733938725663
26    6    0   	  -4.589400181125	  -0.225052661040	  -1.082025305299
27    6    0   	  -2.955030901570	   1.748650083037	  -0.973397703296
28    1    0   	  -5.054057988875	   1.847760093418	  -1.377917636376
29    1    0   	  -4.714633714813	   1.441672939344	   0.296514336797
30    1    0   	  -4.548179654521	  -0.452425483637	  -2.147164209832
31    1    0   	  -2.919309998715	   2.811278904946	  -0.715583587743
32    1    0   	  -2.694284688889	   1.598763592397	  -2.024271379804
33    6    0   	  -4.788869163334	  -1.240818356176	  -0.231807326261
34    1    0   	  -0.729197749014	  -2.350557099669	   2.058344376933
35    6    0   	  -4.886185777260	  -1.107477072061	   1.265659880911
36    1    0   	  -4.175867015298	  -1.784940619743	   1.754698947081
37    1    0   	  -4.705749670382	  -0.096834138805	   1.636250340744
38    1    0   	  -5.881727721823	  -1.413215228271	   1.604032537383
39    6    0   	  -4.954751152148	  -2.647895089717	  -0.740273033205
40    1    0   	  -5.926798074705	  -3.050679332230	  -0.437202540762
41    1    0   	  -4.885215543373	  -2.700937988381	  -1.828085037651
42    1    0   	  -4.193738198723	  -3.308390504153	  -0.308580500182
43    6    0   	  -1.990189505426	   1.356523031474	   1.317987360822
44    1    0   	  -2.682898768468	   2.150606194801	   1.596294356542
45    1    0   	  -2.039574128131	   0.512245818953	   2.010041116028
46    1    0   	  -0.944660813574	   1.740435925471	   1.388751159943
47    6    0   	   1.251683966873	   3.505521435516	  -0.686776117257
48    1    0   	   2.161427321901	   3.746696439634	  -1.248783066344
49    1    0   	   0.442393186386	   3.363626546378	  -1.405622526271
50    1    0   	   1.020473756341	   4.385331374178	  -0.077724294500
51    6    0   	   1.904307202264	  -1.793167211303	   2.602691718935
52    1    0   	   1.367982218926	  -2.358298714565	   3.372547584568
53    1    0   	   2.926849011736	  -2.166265284989	   2.570111560215
54    1    0   	   1.932821471886	  -0.748786805283	   2.943572173488
55    6    0   	   3.248816543269	  -2.467386052306	  -0.122593126901
56    6    0   	   3.809752547480	  -1.581715585278	  -1.242963393331
57    6    0   	   3.885628994067	  -0.087232591611	  -0.989243494966
58    1    0   	   3.366400994825	  -3.511639865641	  -0.436142784842
59    1    0   	   3.844624210276	  -2.353265525850	   0.785361987931
60    1    0   	   4.813507322874	  -1.934934635935	  -1.513549192575
61    1    0   	   3.201600728297	  -1.740022933352	  -2.145726146615
62    1    0   	   3.797500935202	  -0.219396080217	   1.092840068009
63    6    0   	   3.983145341861	   0.710827363047	  -2.264363022650
64    1    0   	   4.759427978091	   0.294149659279	  -2.915214817203
65    1    0   	   3.040885398382	   0.645939222397	  -2.823873452740
66    1    0   	   4.210193678782	   1.764986960336	  -2.108189800384
---------------------------------------------------------------------
SCF Done:  E(scf) =  -976.593933884395     A.U.


IRC-IRC-IRC-IRC-IRC-IRC-IRC-IRC-IRC-IRC-IRC-IRC-IRC-IRC-IRC-IRC-IRC-IRC
Pt  25  Step number   1 out of a maximum of  2639
NET REACTION COORDINATE UP TO THIS POINT =    25.00000
IRC-IRC-IRC-IRC-IRC-IRC-IRC-IRC-IRC-IRC-IRC-IRC-IRC-IRC-IRC-IRC-IRC-IRC
                         Input orientation:
---------------------------------------------------------------------
Center     Atomic      Atomic             Coordinates (Angstroms)
Number     Number       Type             X           Y           Z
---------------------------------------------------------------------
1     6    0   	  -0.290001044709	  -1.567774714203	   1.419363835611
2     6    0   	   1.187187226232	  -1.894659420901	   1.279457655566
3     6    0   	   2.615426385697	   2.433770381025	   1.195495442018
4     6    0   	   1.789974762788	  -2.193684615679	   0.125217941327
5     6    0   	   3.948251490460	   1.909474965043	   0.590377567943
6     6    0   	   3.886832246243	   0.449235786257	   0.234964611699
7     1    0   	   2.382760082096	   1.841125656343	   2.087583755494
8     1    0   	   4.731921308583	   2.071072720245	   1.338665485867
9     1    0   	   2.750449065652	   3.471696268997	   1.515208936861
10    1    0   	   4.214413130192	   2.523760989627	  -0.273383283535
11    1    0   	   1.184883166026	  -2.239366938134	  -0.782160585917
12    6    0   	   0.907859109405	   1.111746041649	   0.068571064980
13    1    0   	  -0.352755054175	  -0.652365193455	   2.021793845647
14    6    0   	   1.491353709590	   2.317310563483	   0.195255534225
15    1    0   	   1.254084376840	   0.339557825686	   0.744778471506
16    6    0   	  -1.333576177463	  -0.143842842292	  -0.628523231978
17    6    0   	  -1.169303834422	  -1.459900109955	   0.163881827520
18    6    0   	   0.035903043315	   0.633152664545	  -1.033220219729
19    6    0   	  -2.104936003521	   0.953720073800	  -0.079270657632
20    1    0   	  -2.189752771053	  -1.754153571460	   0.432343195962
21    1    0   	  -0.845177790167	  -2.210770828923	  -0.563247424896
22    1    0   	  -1.767132483809	  -0.398852260850	  -1.600533589922
23    1    0   	  -0.203659778685	   1.412517679557	  -1.760350125782
24    1    0   	   0.562003820453	  -0.165239409257	  -1.571868609851
25    6    0   	  -4.428263876975	   1.225855671105	  -0.728666964476
26    6    0   	  -4.592171749092	  -0.225680876385	  -1.079106358938
27    6    0   	  -2.960738022455	   1.750749964929	  -0.971389259574
28    1    0   	  -5.061033480863	   1.846838919141	  -1.369735172151
29    1    0   	  -4.716275369614	   1.438243626079	   0.302985526636
30    1    0   	  -4.553863593354	  -0.450850074399	  -2.144816273604
31    1    0   	  -2.926729226070	   2.813349592505	  -0.713297121203
32    1    0   	  -2.702287290744	   1.601746139787	  -2.022957366579
33    6    0   	  -4.787515689434	  -1.243446989113	  -0.230321833290
34    1    0   	  -0.732871723510	  -2.344680847931	   2.056288869778
35    6    0   	  -4.880376644430	  -1.113191834132	   1.267701967964
36    1    0   	  -4.167958304530	  -1.790967276461	   1.753244771475
37    1    0   	  -4.699689483433	  -0.103111619936	   1.639721982486
38    1    0   	  -5.874607815345	  -1.420477249877	   1.608525466271
39    6    0   	  -4.952805745981	  -2.649764971276	  -0.741071216645
40    1    0   	  -5.923117139376	  -3.054809710678	  -0.435470488615
41    1    0   	  -4.886926755978	  -2.700480638971	  -1.829218893759
42    1    0   	  -4.189193448287	  -3.309848429107	  -0.313352449459
43    6    0   	  -1.988998863938	   1.360543005945	   1.317349220901
44    1    0   	  -2.680797399241	   2.155007395527	   1.596810972674
45    1    0   	  -2.037701270611	   0.516442128475	   2.009697950477
46    1    0   	  -0.943004682560	   1.743469806916	   1.386387727024
47    6    0   	   1.246151293718	   3.510828402716	  -0.681147690482
48    1    0   	   2.154506423797	   3.756528286914	  -1.243447576381
49    1    0   	   0.435928635173	   3.370829063261	  -1.399322277696
50    1    0   	   1.014255348371	   4.387194829873	  -0.067389127402
51    6    0   	   1.899695822400	  -1.797229667547	   2.604143843785
52    1    0   	   1.360987370785	  -2.363505123226	   3.371480363228
53    1    0   	   2.921792896588	  -2.171641991417	   2.572833256289
54    1    0   	   1.928911424486	  -0.753718977505	   2.947587753603
55    6    0   	   3.249142328910	  -2.468585366040	  -0.119086314074
56    6    0   	   3.814423831883	  -1.586160599537	  -1.239760917949
57    6    0   	   3.891303785640	  -0.091217423590	  -0.989266988732
58    1    0   	   3.365244022871	  -3.513647428572	  -0.430541867093
59    1    0   	   3.843355937428	  -2.354065668923	   0.789874964391
60    1    0   	   4.818569576657	  -1.941247862788	  -1.506412005600
61    1    0   	   3.208885018765	  -1.745763084208	  -2.144041700826
62    1    0   	   3.789876572783	  -0.218829171768	   1.092401833169
63    6    0   	   3.998927245121	   0.703440178516	  -2.265672680820
64    1    0   	   4.782070320748	   0.286373929763	  -2.908120472142
65    1    0   	   3.062038598875	   0.635144490000	  -2.833701389582
66    1    0   	   4.222586065714	   1.758445415099	  -2.110292285408
---------------------------------------------------------------------
SCF Done:  E(scf) =  -976.593896134122     A.U.


IRC-IRC-IRC-IRC-IRC-IRC-IRC-IRC-IRC-IRC-IRC-IRC-IRC-IRC-IRC-IRC-IRC-IRC
Pt  26  Step number   1 out of a maximum of  2639
NET REACTION COORDINATE UP TO THIS POINT =    26.00000
IRC-IRC-IRC-IRC-IRC-IRC-IRC-IRC-IRC-IRC-IRC-IRC-IRC-IRC-IRC-IRC-IRC-IRC
                         Input orientation:
---------------------------------------------------------------------
Center     Atomic      Atomic             Coordinates (Angstroms)
Number     Number       Type             X           Y           Z
---------------------------------------------------------------------
1     6    0   	  -0.291264267605	  -1.563749094595	   1.416398501518
2     6    0   	   1.185333389944	  -1.894392686556	   1.279183546720
3     6    0   	   2.614973869201	   2.432725118119	   1.193852284963
4     6    0   	   1.790400450124	  -2.191483452662	   0.125623863205
5     6    0   	   3.946949484947	   1.908637690240	   0.586993909961
6     6    0   	   3.885488326450	   0.447945570768	   0.233606547054
7     1    0   	   2.382755319233	   1.838810164933	   2.085241117734
8     1    0   	   4.731812399332	   2.071437950505	   1.333826230431
9     1    0   	   2.750748137226	   3.470043985834	   1.515177967718
10    1    0   	   4.211320327948	   2.522025615436	  -0.277956579199
11    1    0   	   1.187678781706	  -2.232747489396	  -0.783554185519
12    6    0   	   0.907533503059	   1.113085566637	   0.063432590703
13    1    0   	  -0.352294842563	  -0.647053337685	   2.017018634861
14    6    0   	   1.489593903791	   2.318903549342	   0.194627187174
15    1    0   	   1.256215605752	   0.338047903154	   0.735091317932
16    6    0   	  -1.335851092008	  -0.139329206271	  -0.630996013008
17    6    0   	  -1.168752910103	  -1.456158207594	   0.159503871534
18    6    0   	   0.032503301381	   0.638658520973	  -1.037650555002
19    6    0   	  -2.106982253225	   0.957361114729	  -0.079571222343
20    1    0   	  -2.188813915533	  -1.753678399108	   0.425639438276
21    1    0   	  -0.841385397490	  -2.204771277240	  -0.568504558461
22    1    0   	  -1.771189647271	  -0.394017392180	  -1.602295102210
23    1    0   	  -0.208919271483	   1.420413748917	  -1.761617604782
24    1    0   	   0.556454044260	  -0.158245629993	  -1.580554178068
25    6    0   	  -4.432453089927	   1.224753365146	  -0.723259892794
26    6    0   	  -4.594949564934	  -0.226327042642	  -1.076122351246
27    6    0   	  -2.966547663253	   1.752891810881	  -0.969359315336
28    1    0   	  -5.068133424497	   1.845874587794	  -1.361315329756
29    1    0   	  -4.717857009188	   1.434711418992	   0.309621231529
30    1    0   	  -4.559607946730	  -0.449231343587	  -2.142406579902
31    1    0   	  -2.934283928115	   2.815461723432	  -0.710993897053
32    1    0   	  -2.710471170257	   1.604774138695	  -2.021636239698
33    6    0   	  -4.786086953248	  -1.246143850281	  -0.228838373804
34    1    0   	  -0.736675162954	  -2.338343136626	   2.054355467897
35    6    0   	  -4.874419305733	  -1.119067467492	   1.269735713101
36    1    0   	  -4.159855034227	  -1.797141350255	   1.751699679642
37    1    0   	  -4.693510448082	  -0.109565440336	   1.643237036354
38    1    0   	  -5.867299945729	  -1.427972410235	   1.613031971278
39    6    0   	  -4.950766879070	  -2.651671478567	  -0.741954284900
40    1    0   	  -5.919310277448	  -3.059026423717	  -0.433827114200
41    1    0   	  -4.888582462142	  -2.699994587125	  -1.830427919608
42    1    0   	  -4.184534147025	  -3.311335575710	  -0.318281731061
43    6    0   	  -1.987747914803	   1.364680639926	   1.316651667449
44    1    0   	  -2.678605935227	   2.159545023723	   1.597278159392
45    1    0   	  -2.035792448995	   0.520754866321	   2.009294665420
46    1    0   	  -0.941276614407	   1.746568877263	   1.383957041624
47    6    0   	   1.240324021082	   3.516390480639	  -0.675189154355
48    1    0   	   2.147277250907	   3.767101864610	  -1.237549047093
49    1    0   	   0.429312421098	   3.378262098560	  -1.392839671801
50    1    0   	   1.007403882302	   4.389028377203	  -0.056493942521
51    6    0   	   1.894940072780	  -1.801804208168	   2.605782567893
52    1    0   	   1.353736020255	  -2.369376829559	   3.370396329662
53    1    0   	   2.916552531850	  -2.177625135378	   2.575710426001
54    1    0   	   1.924932753221	  -0.759261869799	   2.952070477774
55    6    0   	   3.249498980188	  -2.469833989281	  -0.115398961510
56    6    0   	   3.819168511226	  -1.590770724647	  -1.236420412314
57    6    0   	   3.896956170852	  -0.095342003591	  -0.989312694348
58    1    0   	   3.364062874459	  -3.515727609091	  -0.424681450034
59    1    0   	   3.842105028319	  -2.354868833333	   0.794568259874
60    1    0   	   4.823724264484	  -1.947702523031	  -1.499025988848
61    1    0   	   3.216303989280	  -1.751810161203	  -2.142222407017
62    1    0   	   3.782337346637	  -0.218209543464	   1.091856822516
63    6    0   	   4.014696861078	   0.695742623720	  -2.266993831233
64    1    0   	   4.805168989715	   0.278757882117	  -2.900461465992
65    1    0   	   3.083694082025	   0.623192113519	  -2.843906088988
66    1    0   	   4.234147067779	   1.751767428291	  -2.112642876008
---------------------------------------------------------------------
SCF Done:  E(scf) =  -976.593855652764     A.U.


IRC-IRC-IRC-IRC-IRC-IRC-IRC-IRC-IRC-IRC-IRC-IRC-IRC-IRC-IRC-IRC-IRC-IRC
Pt  27  Step number   1 out of a maximum of  2639
NET REACTION COORDINATE UP TO THIS POINT =    27.00000
IRC-IRC-IRC-IRC-IRC-IRC-IRC-IRC-IRC-IRC-IRC-IRC-IRC-IRC-IRC-IRC-IRC-IRC
                         Input orientation:
---------------------------------------------------------------------
Center     Atomic      Atomic             Coordinates (Angstroms)
Number     Number       Type             X           Y           Z
---------------------------------------------------------------------
1     6    0   	  -0.292464358866	  -1.559532412391	   1.413477670891
2     6    0   	   1.183466560019	  -1.894221423466	   1.279030774271
3     6    0   	   2.614551858099	   2.431734270395	   1.192088323595
4     6    0   	   1.790872896049	  -2.189152942064	   0.126133605306
5     6    0   	   3.945665789436	   1.907839014489	   0.583481381708
6     6    0   	   3.884232288405	   0.446666098128	   0.232217859631
7     1    0   	   2.382783700029	   1.836564823354	   2.082786651022
8     1    0   	   4.731740823285	   2.071922723007	   1.328810894478
9     1    0   	   2.751098264215	   3.468444326144	   1.515012422907
10    1    0   	   4.208192425550	   2.520268421424	  -0.282711991355
11    1    0   	   1.190612999618	  -2.225620635813	  -0.784889184892
12    6    0   	   0.907253601802	   1.114511435227	   0.058118744360
13    1    0   	  -0.351585040981	  -0.641442857502	   2.012129782170
14    6    0   	   1.487839555700	   2.320570344830	   0.193912160284
15    1    0   	   1.258443118457	   0.336583189820	   0.725105302999
16    6    0   	  -1.338043620021	  -0.134728589847	  -0.633535630900
17    6    0   	  -1.168076912454	  -1.452287736482	   0.155115898914
18    6    0   	   0.029103893862	   0.644326834796	  -1.042227488440
19    6    0   	  -2.108992838763	   0.961060177231	  -0.079916956269
20    1    0   	  -2.187737616558	  -1.753105649849	   0.418877585079
21    1    0   	  -0.837407535503	  -2.198643787255	  -0.573719854658
22    1    0   	  -1.775215090885	  -0.389152185939	  -1.604083531754
23    1    0   	  -0.214285817240	   1.428551622165	  -1.762879799995
24    1    0   	   0.550991949369	  -0.150894515333	  -1.589560184822
25    6    0   	  -4.436633664398	   1.223623894940	  -0.717756413620
26    6    0   	  -4.597715658806	  -0.226978803233	  -1.073102082566
27    6    0   	  -2.972391739668	   1.755043147166	  -0.967319450631
28    1    0   	  -5.075274332428	   1.844888668297	  -1.352715594750
29    1    0   	  -4.719344301161	   1.431105231266	   0.316371651307
30    1    0   	  -4.565372317022	  -0.447569196597	  -2.139958616857
31    1    0   	  -2.941886328672	   2.817580949158	  -0.708679322653
32    1    0   	  -2.718754964245	   1.607810223386	  -2.020313552446
33    6    0   	  -4.784604373057	  -1.248881903779	  -0.227380557239
34    1    0   	  -0.740573281439	  -2.331607479252	   2.052584233403
35    6    0   	  -4.868380293838	  -1.125056001844	   1.271730543525
36    1    0   	  -4.151670044356	  -1.803436486703	   1.750065531643
37    1    0   	  -4.687253216557	  -0.116151164865	   1.646760381206
38    1    0   	  -5.859894227330	  -1.435610860022	   1.617488442495
39    6    0   	  -4.948660185614	  -2.653590347904	  -0.742933612847
40    1    0   	  -5.915406722052	  -3.063298185014	  -0.432295029791
41    1    0   	  -4.890194057764	  -2.699467876879	  -1.831718665243
42    1    0   	  -4.179797076952	  -3.312823740506	  -0.323364017987
43    6    0   	  -1.986446035054	   1.368885225182	   1.315899061357
44    1    0   	  -2.676358801975	   2.164149073327	   1.597693194492
45    1    0   	  -2.033834433648	   0.525130747561	   2.008833585730
46    1    0   	  -0.939497481249	   1.749717341124	   1.381469485602
47    6    0   	   1.234381824018	   3.522063086110	  -0.669140351518
48    1    0   	   2.139953467672	   3.778135050071	  -1.231302331584
49    1    0   	   0.422747623460	   3.385743626052	  -1.386436754857
50    1    0   	   1.000129646008	   4.390773254098	  -0.045414551286
51    6    0   	   1.890050662157	  -1.807002759114	   2.607614969133
52    1    0   	   1.346318916178	  -2.376203834683	   3.369217174517
53    1    0   	   2.911184384922	  -2.184196878441	   2.578685057030
54    1    0   	   1.920763187097	  -0.765583388136	   2.957182872043
55    6    0   	   3.249863037400	  -2.471082316803	  -0.111590717516
56    6    0   	   3.823938280728	  -1.595442316295	  -1.232965367940
57    6    0   	   3.902565098552	  -0.099520830374	  -0.989318150793
58    1    0   	   3.362820344919	  -3.517815459411	  -0.418673764737
59    1    0   	   3.840869348586	  -2.355672848518	   0.799373832132
60    1    0   	   4.828905986160	  -1.954189109365	  -1.491478441274
61    1    0   	   3.223773756150	  -1.757992678209	  -2.140279177037
62    1    0   	   3.775093906305	  -0.217541683440	   1.091293954773
63    6    0   	   4.030040820057	   0.687912569861	  -2.268283297972
64    1    0   	   4.827472626574	   0.270936740649	  -2.892996185330
65    1    0   	   3.104733321519	   0.611086003749	  -2.853612450558
66    1    0   	   4.245421996104	   1.744939349317	  -2.115180195200
---------------------------------------------------------------------
SCF Done:  E(scf) =  -976.593813298296     A.U.


IRC-IRC-IRC-IRC-IRC-IRC-IRC-IRC-IRC-IRC-IRC-IRC-IRC-IRC-IRC-IRC-IRC-IRC
Pt  28  Step number   1 out of a maximum of  2639
NET REACTION COORDINATE UP TO THIS POINT =    28.00000
IRC-IRC-IRC-IRC-IRC-IRC-IRC-IRC-IRC-IRC-IRC-IRC-IRC-IRC-IRC-IRC-IRC-IRC
                         Input orientation:
---------------------------------------------------------------------
Center     Atomic      Atomic             Coordinates (Angstroms)
Number     Number       Type             X           Y           Z
---------------------------------------------------------------------
1     6    0   	  -0.293607774457	  -1.555132912074	   1.410636615152
2     6    0   	   1.181579265172	  -1.894153116647	   1.279005656169
3     6    0   	   2.614117979867	   2.430785445623	   1.190175599721
4     6    0   	   1.791382513773	  -2.186635850275	   0.126736423232
5     6    0   	   3.944395988323	   1.907082124702	   0.579884099145
6     6    0   	   3.883038968208	   0.445416705413	   0.230790656741
7     1    0   	   2.382773852905	   1.834384455911	   2.080189563287
8     1    0   	   4.731651878738	   2.072494706590	   1.323724935345
9     1    0   	   2.751423731009	   3.466891498292	   1.514677881933
10    1    0   	   4.205087891215	   2.518520511020	  -0.287565315166
11    1    0   	   1.193667234195	  -2.217882886928	  -0.786167726534
12    6    0   	   0.906966090071	   1.115994701415	   0.052623455906
13    1    0   	  -0.350622718345	  -0.635538760055	   2.007156730053
14    6    0   	   1.486085286085	   2.322267678215	   0.193042223493
15    1    0   	   1.260673931949	   0.335167579206	   0.714873644638
16    6    0   	  -1.340256354023	  -0.130067634978	  -0.636069599421
17    6    0   	  -1.167321621542	  -1.448310471881	   0.150777017204
18    6    0   	   0.025620407517	   0.650095542793	  -1.046916053317
19    6    0   	  -2.111011264776	   0.964821776675	  -0.080251450563
20    1    0   	  -2.186551629016	  -1.752490845813	   0.412141524815
21    1    0   	  -0.833286249281	  -2.192392100120	  -0.578851314460
22    1    0   	  -1.779320528562	  -0.384286751654	  -1.605820021971
23    1    0   	  -0.219800290423	   1.436811546279	  -1.764178947173
24    1    0   	   0.545416499321	  -0.143376751930	  -1.598750912445
25    6    0   	  -4.440828636672	   1.222476182213	  -0.712147714452
26    6    0   	  -4.600489789800	  -0.227625053509	  -1.070046511335
27    6    0   	  -2.978290556671	   1.757214495482	  -0.965233072130
28    1    0   	  -5.082471282838	   1.843892545713	  -1.343931710736
29    1    0   	  -4.720776702953	   1.427428149557	   0.323242107261
30    1    0   	  -4.571185156631	  -0.445845782956	  -2.137474714124
31    1    0   	  -2.949558773726	   2.819719012191	  -0.706325043942
32    1    0   	  -2.727141068664	   1.610856891666	  -2.018947468331
33    6    0   	  -4.783071148206	  -1.251655841544	  -0.225953698679
34    1    0   	  -0.744552513728	  -2.324476587211	   2.051027321320
35    6    0   	  -4.862253024332	  -1.131157757235	   1.273681757614
36    1    0   	  -4.143402464027	  -1.809861495838	   1.748333126468
37    1    0   	  -4.680899855744	  -0.122872849352	   1.650290537084
38    1    0   	  -5.852385027130	  -1.443386193174	   1.621894472339
39    6    0   	  -4.946485163770	  -2.655514861034	  -0.744018276212
40    1    0   	  -5.911408968274	  -3.067618886980	  -0.430890872012
41    1    0   	  -4.891753131799	  -2.698892362015	  -1.833100622684
42    1    0   	  -4.174984602788	  -3.314307646303	  -0.328603321022
43    6    0   	  -1.985104268173	   1.373189171592	   1.315137451226
44    1    0   	  -2.674058149574	   2.168862190411	   1.598096183767
45    1    0   	  -2.031830563636	   0.529618732511	   2.008380127201
46    1    0   	  -0.937680420424	   1.752954723310	   1.378942745160
47    6    0   	   1.228415195171	   3.527742007990	  -0.663182047147
48    1    0   	   2.132599494970	   3.789263069627	  -1.225045666317
49    1    0   	   0.416203854988	   3.393223893442	  -1.380171328565
50    1    0   	   0.992765169438	   4.392449623583	  -0.034419261114
51    6    0   	   1.885015982907	  -1.812917732730	   2.609649844945
52    1    0   	   1.338775366482	  -2.384210827572	   3.367892233977
53    1    0   	   2.905708932990	  -2.191360231144	   2.581715164760
54    1    0   	   1.916297485121	  -0.772815074932	   2.963056437691
55    6    0   	   3.250220862158	  -2.472272652777	  -0.107710494104
56    6    0   	   3.828714680523	  -1.600111351178	  -1.229445696196
57    6    0   	   3.908189182480	  -0.103699952892	  -0.989303097378
58    1    0   	   3.361488189250	  -3.519850110490	  -0.412582959160
59    1    0   	   3.839655261096	  -2.356438120392	   0.804233080141
60    1    0   	   4.834076827764	  -1.960677037170	  -1.483848919407
61    1    0   	   3.231252657478	  -1.764206400891	  -2.138254538307
62    1    0   	   3.767986161313	  -0.216822694033	   1.090670771449
63    6    0   	   4.045300617485	   0.680045734521	  -2.269502771129
64    1    0   	   4.849339456908	   0.262905452485	  -2.885599179634
65    1    0   	   3.125618360645	   0.599147323819	  -2.862970349421
66    1    0   	   4.256931942450	   1.738009623442	  -2.117764700497
---------------------------------------------------------------------
SCF Done:  E(scf) =  -976.593768909615     A.U.


IRC-IRC-IRC-IRC-IRC-IRC-IRC-IRC-IRC-IRC-IRC-IRC-IRC-IRC-IRC-IRC-IRC-IRC
Pt  29  Step number   1 out of a maximum of  2639
NET REACTION COORDINATE UP TO THIS POINT =    29.00000
IRC-IRC-IRC-IRC-IRC-IRC-IRC-IRC-IRC-IRC-IRC-IRC-IRC-IRC-IRC-IRC-IRC-IRC
                         Input orientation:
---------------------------------------------------------------------
Center     Atomic      Atomic             Coordinates (Angstroms)
Number     Number       Type             X           Y           Z
---------------------------------------------------------------------
1     6    0   	  -0.294721178244	  -1.550327803680	   1.407768970993
2     6    0   	   1.179603983157	  -1.894173619991	   1.279120721078
3     6    0   	   2.613633661381	   2.429820725672	   1.188018337371
4     6    0   	   1.791967031686	  -2.183790138623	   0.127470771798
5     6    0   	   3.943085243837	   1.906334927436	   0.576064816577
6     6    0   	   3.881873568242	   0.444145242682	   0.229283395494
7     1    0   	   2.382697274284	   1.832159791085	   2.077323265659
8     1    0   	   4.731521712684	   2.073187884980	   1.318387201651
9     1    0   	   2.751698721780	   3.465303975898	   1.514147671792
10    1    0   	   4.201886022880	   2.516710367859	  -0.292701232845
11    1    0   	   1.196997554835	  -2.209110262782	  -0.787424020645
12    6    0   	   0.906653238730	   1.117571778650	   0.046677044895
13    1    0   	  -0.349321043550	  -0.629037704019	   2.001870673920
14    6    0   	   1.484250285504	   2.324038908553	   0.191950809637
15    1    0   	   1.263003584820	   0.333713281397	   0.703912027176
16    6    0   	  -1.342602951961	  -0.125153707704	  -0.638697501268
17    6    0   	  -1.166445944492	  -1.444050589853	   0.146321742390
18    6    0   	   0.021886629794	   0.656193311380	  -1.051939681500
19    6    0   	  -2.113129953225	   0.968807459414	  -0.080580494149
20    1    0   	  -2.185185728918	  -1.751817607843	   0.405175846446
21    1    0   	  -0.828831424755	  -2.185742339497	  -0.584092949551
22    1    0   	  -1.783715111712	  -0.379232732625	  -1.607559127508
23    1    0   	  -0.225712823380	   1.445523064477	  -1.765595529325
24    1    0   	   0.539433443378	  -0.135417875991	  -1.608534914071
25    6    0   	  -4.445221372169	   1.221269025404	  -0.706188756791
26    6    0   	  -4.603399950657	  -0.228282501548	  -1.066825713911
27    6    0   	  -2.984500480370	   1.759500116627	  -0.963000660944
28    1    0   	  -5.090030522636	   1.842854122935	  -1.334580532204
29    1    0   	  -4.722217512278	   1.423530158800	   0.330529452265
30    1    0   	  -4.577316990596	  -0.443970714243	  -2.134848801258
31    1    0   	  -2.957626732959	   2.821968429508	  -0.703820706692
32    1    0   	  -2.735989770613	   1.614042722758	  -2.017467668264
33    6    0   	  -4.781414574583	  -1.254577444342	  -0.224503540197
34    1    0   	  -0.748762879256	  -2.316579195783	   2.049660934019
35    6    0   	  -4.855754427227	  -1.137630791551	   1.275664572739
36    1    0   	  -4.134664652192	  -1.816675430795	   1.746413822729
37    1    0   	  -4.674172662156	  -0.130011794251	   1.653967801687
38    1    0   	  -5.844422589484	  -1.451643673437	   1.626436764146
39    6    0   	  -4.944145926960	  -2.657517101205	  -0.745266462051
40    1    0   	  -5.907137846823	  -3.072164958486	  -0.429563219050
41    1    0   	  -4.893334055865	  -2.698228441083	  -1.834641283159
42    1    0   	  -4.169887819400	  -3.315838876284	  -0.334246667563
43    6    0   	  -1.983660776164	   1.377780894415	   1.314339656833
44    1    0   	  -2.671594535182	   2.173895241091	   1.598510530495
45    1    0   	  -2.029695635974	   0.534415291385	   2.007921099297
46    1    0   	  -0.935740439584	   1.756414959269	   1.376269214623
47    6    0   	   1.222197399034	   3.533616797547	  -0.657123821804
48    1    0   	   2.124870188519	   3.800652974374	  -1.218796956462
49    1    0   	   0.409257590878	   3.401048293655	  -1.373659730798
50    1    0   	   0.985317731703	   4.394170688076	  -0.023134518673
51    6    0   	   1.879603607582	  -1.819873570171	   2.611990391113
52    1    0   	   1.330860470075	  -2.394029111911	   3.366263487427
53    1    0   	   2.899945399911	  -2.199305804448	   2.584904617946
54    1    0   	   1.911124068850	  -0.781410058777	   2.970132280245
55    6    0   	   3.250593880824	  -2.473444810087	  -0.103601119447
56    6    0   	   3.833699813653	  -1.604958689100	  -1.225716915801
57    6    0   	   3.914076135851	  -0.108043808006	  -0.989250861094
58    1    0   	   3.359995251732	  -3.521904460367	  -0.406171150962
59    1    0   	   3.838431434238	  -2.357205722449	   0.809338654588
60    1    0   	   4.839449206669	  -1.967424410108	  -1.475838685075
61    1    0   	   3.239043890715	  -1.770680966303	  -2.136060961722
62    1    0   	   3.760738727212	  -0.216021006521	   1.089978691699
63    6    0   	   4.061091952042	   0.671860942763	  -2.270663875572
64    1    0   	   4.871468131606	   0.254236031453	  -2.878034254866
65    1    0   	   3.147084926116	   0.587180228318	  -2.872154047579
66    1    0   	   4.269410881957	   1.730682106902	  -2.120459168109
---------------------------------------------------------------------
SCF Done:  E(scf) =  -976.593720367451     A.U.


IRC-IRC-IRC-IRC-IRC-IRC-IRC-IRC-IRC-IRC-IRC-IRC-IRC-IRC-IRC-IRC-IRC-IRC
Pt  30  Step number   1 out of a maximum of  2639
NET REACTION COORDINATE UP TO THIS POINT =    30.00000
IRC-IRC-IRC-IRC-IRC-IRC-IRC-IRC-IRC-IRC-IRC-IRC-IRC-IRC-IRC-IRC-IRC-IRC
                         Input orientation:
---------------------------------------------------------------------
Center     Atomic      Atomic             Coordinates (Angstroms)
Number     Number       Type             X           Y           Z
---------------------------------------------------------------------
1     6    0   	  -0.295683126731	  -1.545588671808	   1.405161810804
2     6    0   	   1.177755435655	  -1.894255608670	   1.279357478905
3     6    0   	   2.613122937945	   2.428910652393	   1.185856490885
4     6    0   	   1.792571964928	  -2.180928490010	   0.128261927810
5     6    0   	   3.941822850940	   1.905657051787	   0.572375933010
6     6    0   	   3.880836587279	   0.442955504795	   0.227842888190
7     1    0   	   2.382563459920	   1.830070705694	   2.074493896620
8     1    0   	   4.731352596823	   2.073956042758	   1.313262218999
9     1    0   	   2.751886189555	   3.463807017428	   1.513516718597
10    1    0   	   4.198798814226	   2.514992882113	  -0.297664468085
11    1    0   	   1.200253628225	  -2.200279063325	  -0.788521949046
12    6    0   	   0.906338875047	   1.119065154736	   0.040874446017
13    1    0   	  -0.347810878567	  -0.622577159751	   1.996798211959
14    6    0   	   1.482460253930	   2.325708992076	   0.190802255227
15    1    0   	   1.265230396722	   0.332324997750	   0.693284915251
16    6    0   	  -1.344855415915	  -0.120483228165	  -0.641156323470
17    6    0   	  -1.165539879269	  -1.439937611969	   0.142202055644
18    6    0   	   0.018268740685	   0.662001074451	  -1.056808113079
19    6    0   	  -2.115140613624	   0.972615376630	  -0.080864503067
20    1    0   	  -2.183781205785	  -1.751151989212	   0.398697552701
21    1    0   	  -0.824499539374	  -2.179373065183	  -0.588914202856
22    1    0   	  -1.787975930051	  -0.374499364911	  -1.609123155692
23    1    0   	  -0.231447134214	   1.453810395844	  -1.767002331048
24    1    0   	   0.533652742327	  -0.127821311557	  -1.617952307644
25    6    0   	  -4.449376047457	   1.220133455214	  -0.700491142708
26    6    0   	  -4.606155871759	  -0.228876243422	  -1.063777850759
27    6    0   	  -2.990395194171	   1.761680469267	  -0.960841594846
28    1    0   	  -5.097190922676	   1.841890922071	  -1.325625206687
29    1    0   	  -4.723545077580	   1.419811636090	   0.337487615709
30    1    0   	  -4.583158903668	  -0.442123286891	  -2.132362228533
31    1    0   	  -2.965282020659	   2.824111682847	  -0.701403443069
32    1    0   	  -2.744403275726	   1.617069495800	  -2.016019111777
33    6    0   	  -4.779798339889	  -1.257345427493	  -0.223185174764
34    1    0   	  -0.752758169186	  -2.308703965617	   2.048628743861
35    6    0   	  -4.849514252568	  -1.143819602597	   1.277475767661
36    1    0   	  -4.126274913287	  -1.823166614346	   1.744484365574
37    1    0   	  -4.667750079856	  -0.136839986060	   1.657416071433
38    1    0   	  -5.836767036604	  -1.459584228527	   1.630677767234
39    6    0   	  -4.941880885975	  -2.659389128176	  -0.746559363829
40    1    0   	  -5.903051005815	  -3.076450151618	  -0.428481439025
41    1    0   	  -4.894739943282	  -2.697544016378	  -1.836196229673
42    1    0   	  -4.165046748281	  -3.317274648233	  -0.339696848419
43    6    0   	  -1.982263758029	   1.382194284441	   1.313593594400
44    1    0   	  -2.669213550783	   2.178742177991	   1.598905086049
45    1    0   	  -2.027641028548	   0.539037898361	   2.007514310703
46    1    0   	  -0.933871955556	   1.759744978421	   1.373715155727
47    6    0   	   1.216262415962	   3.539142071789	  -0.651489295270
48    1    0   	   2.117439218234	   3.811133192619	  -1.213212556051
49    1    0   	   0.402449105045	   3.408493256471	  -1.367394864439
50    1    0   	   0.978536841973	   4.395852716611	  -0.012591022032
51    6    0   	   1.874393557337	  -1.827048993330	   2.614381601355
52    1    0   	   1.323406297986	  -2.404474561362	   3.364539185242
53    1    0   	   2.894505055039	  -2.207129034417	   2.587933407304
54    1    0   	   1.905817599355	  -0.790348971010	   2.977587406937
55    6    0   	   3.250951249218	  -2.474510505324	  -0.099677489189
56    6    0   	   3.838419232127	  -1.609536489688	  -1.222158168846
57    6    0   	   3.919700444129	  -0.112155963192	  -0.989171439293
58    1    0   	   3.358493872523	  -3.523805426569	  -0.400077405893
59    1    0   	   3.837325418982	  -2.357928542505	   0.814178399584
60    1    0   	   4.844503579530	  -1.973820138661	  -1.468257909787
61    1    0   	   3.246389900089	  -1.776782227557	  -2.133930304258
62    1    0   	   3.754015805120	  -0.215230648787	   1.089296915741
63    6    0   	   4.075916269441	   0.664144524559	  -2.271685458888
64    1    0   	   4.891399964495	   0.245399804637	  -2.871436107399
65    1    0   	   3.166749429803	   0.576847171026	  -2.880043178637
66    1    0   	   4.282239125481	   1.723556169047	  -2.122948208729
---------------------------------------------------------------------
SCF Done:  E(scf) =  -976.593672317058     A.U.


IRC-IRC-IRC-IRC-IRC-IRC-IRC-IRC-IRC-IRC-IRC-IRC-IRC-IRC-IRC-IRC-IRC-IRC
Pt  31  Step number   1 out of a maximum of  2639
NET REACTION COORDINATE UP TO THIS POINT =    31.00000
IRC-IRC-IRC-IRC-IRC-IRC-IRC-IRC-IRC-IRC-IRC-IRC-IRC-IRC-IRC-IRC-IRC-IRC
                         Input orientation:
---------------------------------------------------------------------
Center     Atomic      Atomic             Coordinates (Angstroms)
Number     Number       Type             X           Y           Z
---------------------------------------------------------------------
1     6    0   	  -0.296664757833	  -1.539518221475	   1.402124403569
2     6    0   	   1.175572072218	  -1.894356027353	   1.279780643703
3     6    0   	   2.612466423838	   2.427809127239	   1.183011192089
4     6    0   	   1.793398412687	  -2.177323450105	   0.129374930014
5     6    0   	   3.940250578765	   1.904831815451	   0.567693990394
6     6    0   	   3.879583211809	   0.441495422263	   0.225969999464
7     1    0   	   2.382388724692	   1.827630395981	   2.070895908332
8     1    0   	   4.731113778606	   2.074973313450	   1.306789684432
9     1    0   	   2.752077412347	   3.462013578903	   1.512444948536
10    1    0   	   4.194929232397	   2.512848370039	  -0.303940790320
11    1    0   	   1.204404471736	  -2.189049306679	  -0.789640326688
12    6    0   	   0.905943987297	   1.120880048518	   0.033510473900
13    1    0   	  -0.345485112464	  -0.614243624024	   1.990441037154
14    6    0   	   1.480199287953	   2.327701477419	   0.189256771754
15    1    0   	   1.268027923228	   0.330626370325	   0.679820304624
16    6    0   	  -1.347684263680	  -0.114821155704	  -0.644067786922
17    6    0   	  -1.164309325483	  -1.434849075409	   0.137339464503
18    6    0   	   0.013677301706	   0.669149873200	  -1.062848175558
19    6    0   	  -2.117585714701	   0.977265610634	  -0.081157656053
20    1    0   	  -2.181855756823	  -1.750367365528	   0.391015563540
21    1    0   	  -0.819049103686	  -2.171504905999	  -0.594579062421
22    1    0   	  -1.793314656431	  -0.368859961037	  -1.610874258419
23    1    0   	  -0.238720991640	   1.463990893190	  -1.768688874196
24    1    0   	   0.526224145328	  -0.118455058968	  -1.629622594816
25    6    0   	  -4.454363296615	   1.218748664329	  -0.693507035542
26    6    0   	  -4.609487424154	  -0.229567416596	  -1.060068952092
27    6    0   	  -2.997545479437	   1.764320464353	  -0.958149052047
28    1    0   	  -5.105823227537	   1.840709352236	  -1.314616292275
29    1    0   	  -4.725048822617	   1.415260841843	   0.345982877077
30    1    0   	  -4.590306726462	  -0.439810234142	  -2.129306327950
31    1    0   	  -2.974553484869	   2.826701721175	  -0.698411794049
32    1    0   	  -2.754626302648	   1.620701927115	  -2.014170516080
33    6    0   	  -4.777770582180	  -1.260690331388	  -0.221663700537
34    1    0   	  -0.757521844146	  -2.298461667967	   2.047763254430
35    6    0   	  -4.841801355052	  -1.151373328366	   1.279545708337
36    1    0   	  -4.115842406385	  -1.830959650016	   1.741924317158
37    1    0   	  -4.659950399746	  -0.145162702898	   1.661498756419
38    1    0   	  -5.827240666424	  -1.469450211952	   1.635711583912
39    6    0   	  -4.939082684335	  -2.661607979995	  -0.748267213063
40    1    0   	  -5.898006945182	  -3.081624841847	  -0.427352350319
41    1    0   	  -4.896412050201	  -2.696627883105	  -1.838177585680
42    1    0   	  -4.159153419899	  -3.318939214246	  -0.346499772166
43    6    0   	  -1.980509549760	   1.387640010398	   1.312702312989
44    1    0   	  -2.666215279170	   2.184761733054	   1.599361829564
45    1    0   	  -2.025162128383	   0.544757247135	   2.007056315545
46    1    0   	  -0.931542902879	   1.763809401786	   1.370627686416
47    6    0   	   1.208735566453	   3.545839182226	  -0.644444271234
48    1    0   	   2.108054345406	   3.824196913611	  -1.205989880758
49    1    0   	   0.393965151320	   3.417489572416	  -1.359681919819
50    1    0   	   0.969749325460	   4.397583544993	   0.000560809718
51    6    0   	   1.867943530374	  -1.836313250135	   2.617402288392
52    1    0   	   1.314475402568	  -2.418474562565	   3.362008570492
53    1    0   	   2.887966022380	  -2.216657377396	   2.591565915086
54    1    0   	   1.898638151389	  -0.802108595774	   2.987501167538
55    6    0   	   3.251396006845	  -2.475789779806	  -0.094869123966
56    6    0   	   3.844072007929	  -1.615126085893	  -1.217809886614
57    6    0   	   3.926525369827	  -0.117203887642	  -0.989066621898
58    1    0   	   3.356585817344	  -3.526083907048	  -0.392636421854
59    1    0   	   3.836075660101	  -2.358798672624	   0.820043954744
60    1    0   	   4.850501803769	  -1.981606170747	  -1.459106006391
61    1    0   	   3.255155216404	  -1.784234175396	  -2.131237690871
62    1    0   	   3.745867061236	  -0.214238447997	   1.088267225612
63    6    0   	   4.094058005282	   0.654685188644	  -2.272727701517
64    1    0   	   4.915220241923	   0.234147771068	  -2.863298533987
65    1    0   	   3.190740254392	   0.564817375455	  -2.889166775933
66    1    0   	   4.298761186453	   1.714651218023	  -2.125773471606
---------------------------------------------------------------------
SCF Done:  E(scf) =  -976.593610564394     A.U.


IRC-IRC-IRC-IRC-IRC-IRC-IRC-IRC-IRC-IRC-IRC-IRC-IRC-IRC-IRC-IRC-IRC-IRC
Pt  32  Step number   1 out of a maximum of  2639
NET REACTION COORDINATE UP TO THIS POINT =    32.00000
IRC-IRC-IRC-IRC-IRC-IRC-IRC-IRC-IRC-IRC-IRC-IRC-IRC-IRC-IRC-IRC-IRC-IRC
                         Input orientation:
---------------------------------------------------------------------
Center     Atomic      Atomic             Coordinates (Angstroms)
Number     Number       Type             X           Y           Z
---------------------------------------------------------------------
1     6    0   	  -0.297437497752	  -1.533990181050	   1.399517092443
2     6    0   	   1.173702066715	  -1.894416483995	   1.280238970777
3     6    0   	   2.611895558416	   2.426801434859	   1.180433695127
4     6    0   	   1.794155203312	  -2.174173544353	   0.130439232727
5     6    0   	   3.938881268407	   1.904070585338	   0.563521609564
6     6    0   	   3.878533201029	   0.440161036559	   0.224340851600
7     1    0   	   2.382244682986	   1.825464743292	   2.067669503332
8     1    0   	   4.730918405376	   2.075889951399	   1.301029584017
9     1    0   	   2.752244988626	   3.460402400691	   1.511415109662
10    1    0   	   4.191506666317	   2.510891729163	  -0.309550546977
11    1    0   	   1.208096793843	  -2.179108672637	  -0.790552065716
12    6    0   	   0.905692517666	   1.122414594517	   0.026819047997
13    1    0   	  -0.343219102117	  -0.606615452508	   1.984740692624
14    6    0   	   1.478192396104	   2.329424424324	   0.187840993558
15    1    0   	   1.270757179908	   0.328984375173	   0.667550292151
16    6    0   	  -1.350186463919	  -0.109825526487	  -0.646610563778
17    6    0   	  -1.163144757087	  -1.430315174434	   0.133117544500
18    6    0   	   0.009586644153	   0.675473330519	  -1.068285209799
19    6    0   	  -2.119704536838	   0.981396095355	  -0.081399195466
20    1    0   	  -2.180054019402	  -1.749698225042	   0.384310739941
21    1    0   	  -0.814108760626	  -2.164518397165	  -0.599478584583
22    1    0   	  -1.798080844133	  -0.363931788611	  -1.612357528330
23    1    0   	  -0.245257364859	   1.473026020843	  -1.770209454446
24    1    0   	   0.519516071106	  -0.110166315626	  -1.640128817791
25    6    0   	  -4.458719132118	   1.217545846679	  -0.687337041175
26    6    0   	  -4.612388245392	  -0.230141565160	  -1.056845839978
27    6    0   	  -3.003808311335	   1.766672896975	  -0.955762110569
28    1    0   	  -5.113395648721	   1.839714544663	  -1.304863246341
29    1    0   	  -4.726317312443	   1.411226578907	   0.353494500102
30    1    0   	  -4.596578653420	  -0.437689128964	  -2.126668935900
31    1    0   	  -2.982687213507	   2.829012300102	  -0.695773291339
32    1    0   	  -2.763603942448	   1.623918357444	  -2.012528309160
33    6    0   	  -4.775928837708	  -1.263638667558	  -0.220409665986
34    1    0   	  -0.761679036292	  -2.289090517047	   2.047219119973
35    6    0   	  -4.834932167204	  -1.158083151444	   1.281287871313
36    1    0   	  -4.106533529741	  -1.837856119574	   1.739557871945
37    1    0   	  -4.653055922081	  -0.152551082984	   1.665038483060
38    1    0   	  -5.818754895774	  -1.478255651095	   1.640070950444
39    6    0   	  -4.936573459056	  -2.663542989534	  -0.749907011770
40    1    0   	  -5.893521390889	  -3.086167861900	  -0.426500280306
41    1    0   	  -4.897854169585	  -2.695757099113	  -1.840061104670
42    1    0   	  -4.153917599307	  -3.320407448538	  -0.352659475535
43    6    0   	  -1.978896177455	   1.392484195568	   1.311929788787
44    1    0   	  -2.663458759950	   2.190155077001	   1.599767453311
45    1    0   	  -2.022976354374	   0.549846968876	   2.006668719575
46    1    0   	  -0.929398954159	   1.767359967156	   1.367926433799
47    6    0   	   1.201840206016	   3.551837494740	  -0.638006229018
48    1    0   	   2.099533549126	   3.836265996456	  -1.199131667358
49    1    0   	   0.386405515004	   3.425454560492	  -1.352848678825
50    1    0   	   0.961342656735	   4.398926957895	   0.012588231372
51    6    0   	   1.862309437478	  -1.844521530447	   2.620160816738
52    1    0   	   1.306719125298	  -2.431030269460	   3.359793799197
53    1    0   	   2.882292276629	  -2.224978657530	   2.594810009006
54    1    0   	   1.892236785721	  -0.812567095495	   2.996499632088
55    6    0   	   3.251800742389	  -2.476990124641	  -0.090572476623
56    6    0   	   3.849017508948	  -1.620120046508	  -1.213942925146
57    6    0   	   3.932438642602	  -0.121715252428	  -0.988959218819
58    1    0   	   3.354901801824	  -3.528168363531	  -0.386017495690
59    1    0   	   3.835015957815	  -2.359632609848	   0.825252779373
60    1    0   	   4.855765582114	  -1.988490163556	  -1.451015423811
61    1    0   	   3.262840158239	  -1.790908502894	  -2.128818848340
62    1    0   	   3.738890541365	  -0.213394111029	   1.087432318066
63    6    0   	   4.109694643984	   0.646301570874	  -2.273674521347
64    1    0   	   4.935645180948	   0.224077833515	  -2.856377071215
65    1    0   	   3.211358850223	   0.554332228383	  -2.896985103751
66    1    0   	   4.313179465842	   1.706716945406	  -2.128351109008
---------------------------------------------------------------------
SCF Done:  E(scf) =  -976.593553825257     A.U.


IRC-IRC-IRC-IRC-IRC-IRC-IRC-IRC-IRC-IRC-IRC-IRC-IRC-IRC-IRC-IRC-IRC-IRC
Pt  33  Step number   1 out of a maximum of  2639
NET REACTION COORDINATE UP TO THIS POINT =    33.00000
IRC-IRC-IRC-IRC-IRC-IRC-IRC-IRC-IRC-IRC-IRC-IRC-IRC-IRC-IRC-IRC-IRC-IRC
                         Input orientation:
---------------------------------------------------------------------
Center     Atomic      Atomic             Coordinates (Angstroms)
Number     Number       Type             X           Y           Z
---------------------------------------------------------------------
1     6    0   	  -0.298102602639	  -1.528271054452	   1.396913973229
2     6    0   	   1.171872789620	  -1.894430602393	   1.280712679991
3     6    0   	   2.611372805386	   2.425743456961	   1.177748172267
4     6    0   	   1.794965007763	  -2.171115709561	   0.131584038999
5     6    0   	   3.937570045156	   1.903253330377	   0.559264345673
6     6    0   	   3.877646153855	   0.438746787643	   0.222706648214
7     1    0   	   2.382145444570	   1.823286473621	   2.064354258892
8     1    0   	   4.730772681951	   2.076844948687	   1.295153024143
9     1    0   	   2.752474366794	   3.458743522327	   1.510250259490
10    1    0   	   4.188087743107	   2.508828169308	  -0.315284601582
11    1    0   	   1.211894449494	  -2.169314001980	  -0.791319498914
12    6    0   	   0.905459972753	   1.123966578533	   0.019951771500
13    1    0   	  -0.340683622504	  -0.598712965886	   1.978879781293
14    6    0   	   1.476203970521	   2.331115868437	   0.186355503772
15    1    0   	   1.273498422471	   0.327365850685	   0.654996482268
16    6    0   	  -1.352711413703	  -0.104773244193	  -0.649151093032
17    6    0   	  -1.161890916183	  -1.425687891878	   0.128902176795
18    6    0   	   0.005416167433	   0.681900349220	  -1.073805564595
19    6    0   	  -2.121810341362	   0.985586089452	  -0.081620502548
20    1    0   	  -2.178112899087	  -1.749003755048	   0.377617311135
21    1    0   	  -0.809043115592	  -2.157388857713	  -0.604363936605
22    1    0   	  -1.802917880790	  -0.358978707818	  -1.613798499841
23    1    0   	  -0.251925511023	   1.482205583942	  -1.771696496851
24    1    0   	   0.512634126122	  -0.101703216623	  -1.650817751174
25    6    0   	  -4.463044160367	   1.216306620770	  -0.681092026279
26    6    0   	  -4.615253572143	  -0.230720344040	  -1.053627382556
27    6    0   	  -3.010093890342	   1.769048572068	  -0.953306773511
28    1    0   	  -5.120959512681	   1.838678450611	  -1.294963539973
29    1    0   	  -4.727518404458	   1.407098086232	   0.361077075429
30    1    0   	  -4.602861250823	  -0.435519253531	  -2.124021562064
31    1    0   	  -2.990878031697	   2.831336339116	  -0.693045722074
32    1    0   	  -2.772631850962	   1.627172006654	  -2.010813530796
33    6    0   	  -4.774012532295	  -1.266621913329	  -0.219244712942
34    1    0   	  -0.765776050683	  -2.279341319792	   2.046802576729
35    6    0   	  -4.827922274431	  -1.164906018104	   1.282909990125
36    1    0   	  -4.097024388044	  -1.844817855278	   1.736977923461
37    1    0   	  -4.646064181768	  -0.160067349345	   1.668504921860
38    1    0   	  -5.810067078320	  -1.487277688131	   1.644324923167
39    6    0   	  -4.934002496367	  -2.665473324891	  -0.751711737688
40    1    0   	  -5.888993875480	  -3.090694167930	  -0.425938081534
41    1    0   	  -4.899145670027	  -2.694850450395	  -1.842074431576
42    1    0   	  -4.148704812173	  -3.321886900146	  -0.358954043915
43    6    0   	  -1.977213682976	   1.397423154639	   1.311152022114
44    1    0   	  -2.660606606774	   2.195663880666	   1.600158104153
45    1    0   	  -2.020738120978	   0.555045640938	   2.006292700309
46    1    0   	  -0.927187985413	   1.770977356741	   1.365199695564
47    6    0   	   1.194746365676	   3.557857869049	  -0.631321266656
48    1    0   	   2.090790935474	   3.848888250901	  -1.191685420644
49    1    0   	   0.378836834508	   3.433369879396	  -1.345961472334
50    1    0   	   0.952334196160	   4.399977883716	   0.025023579487
51    6    0   	   1.856658926155	  -1.852617607433	   2.622862509419
52    1    0   	   1.298779675540	  -2.443138549747	   3.357557899690
53    1    0   	   2.876503241129	  -2.233473420947	   2.598118747340
54    1    0   	   1.886054721826	  -0.822912556784	   3.005213683282
55    6    0   	   3.252233049140	  -2.478272834981	  -0.086190575297
56    6    0   	   3.853930320292	  -1.625203213100	  -1.209982112107
57    6    0   	   3.938262853217	  -0.126322998545	  -0.988774158374
58    1    0   	   3.353263054663	  -3.530320369132	  -0.379296952496
59    1    0   	   3.833978787052	  -2.360502796475	   0.830540879214
60    1    0   	   4.860983600494	  -1.995400768568	  -1.442849540825
61    1    0   	   3.270473155599	  -1.797720577003	  -2.126266458778
62    1    0   	   3.732406427563	  -0.212623012491	   1.086561536179
63    6    0   	   4.124826485080	   0.637801730073	  -2.274464267168
64    1    0   	   4.954877258818	   0.213519529981	  -2.849794169957
65    1    0   	   3.231090202860	   0.544217024034	  -2.904027360099
66    1    0   	   4.327796244924	   1.698535158561	  -2.130815388374
---------------------------------------------------------------------
SCF Done:  E(scf) =  -976.593495580430     A.U.


IRC-IRC-IRC-IRC-IRC-IRC-IRC-IRC-IRC-IRC-IRC-IRC-IRC-IRC-IRC-IRC-IRC-IRC
Pt  34  Step number   1 out of a maximum of  2639
NET REACTION COORDINATE UP TO THIS POINT =    34.00000
IRC-IRC-IRC-IRC-IRC-IRC-IRC-IRC-IRC-IRC-IRC-IRC-IRC-IRC-IRC-IRC-IRC-IRC
                         Input orientation:
---------------------------------------------------------------------
Center     Atomic      Atomic             Coordinates (Angstroms)
Number     Number       Type             X           Y           Z
---------------------------------------------------------------------
1     6    0   	  -0.298670024344	  -1.522426820425	   1.394316640171
2     6    0   	   1.170100270644	  -1.894382196072	   1.281188287147
3     6    0   	   2.610890267315	   2.424618555214	   1.175043246991
4     6    0   	   1.795819579771	  -2.168171200830	   0.132781190717
5     6    0   	   3.936320573043	   1.902371564135	   0.555029682182
6     6    0   	   3.876875213919	   0.437267325373	   0.221098022939
7     1    0   	   2.382071452001	   1.821060889412	   2.061025924882
8     1    0   	   4.730655043559	   2.077736128441	   1.289323404286
9     1    0   	   2.752738633707	   3.457019275904	   1.509055609819
10    1    0   	   4.184772386473	   2.506706187130	  -0.320971613065
11    1    0   	   1.215759553387	  -2.159757260074	  -0.791988215203
12    6    0   	   0.905255588069	   1.125498436538	   0.013004309593
13    1    0   	  -0.337955459120	  -0.590641349399	   1.972915664936
14    6    0   	   1.474261468743	   2.332743983774	   0.184852434412
15    1    0   	   1.276235409333	   0.325737316540	   0.642311797260
16    6    0   	  -1.355231217349	  -0.099703891364	  -0.651682300598
17    6    0   	  -1.160557717607	  -1.421015243018	   0.124700261057
18    6    0   	   0.001221558752	   0.688369229209	  -1.079353880859
19    6    0   	  -2.123884233691	   0.989801139044	  -0.081831559900
20    1    0   	  -2.176052504412	  -1.748323785789	   0.370941075221
21    1    0   	  -0.803864484045	  -2.150174508184	  -0.609229986015
22    1    0   	  -1.807767843866	  -0.354031367755	  -1.615208312229
23    1    0   	  -0.258633640520	   1.491456998202	  -1.773129084162
24    1    0   	   0.505654833625	  -0.093152278682	  -1.661597234033
25    6    0   	  -4.467313325685	   1.215045595416	  -0.674822182615
26    6    0   	  -4.618066886212	  -0.231297687112	  -1.050437853267
27    6    0   	  -3.016353466986	   1.771430712272	  -0.950820071582
28    1    0   	  -5.128473392873	   1.837621602018	  -1.284993422114
29    1    0   	  -4.728643890045	   1.402909278262	   0.368678439100
30    1    0   	  -4.609099111925	  -0.433314156161	  -2.121391739048
31    1    0   	  -2.999057109659	   2.833660922403	  -0.690277622142
32    1    0   	  -2.781643447705	   1.630434117462	  -2.009061696254
33    6    0   	  -4.772044162714	  -1.269619071849	  -0.218167048268
34    1    0   	  -0.769782769542	  -2.269348730471	   2.046470949405
35    6    0   	  -4.820861644411	  -1.171782303172	   1.284419995076
36    1    0   	  -4.087507936174	  -1.851861748813	   1.734258162895
37    1    0   	  -4.638976576397	  -0.167660494344	   1.671890344302
38    1    0   	  -5.801332040523	  -1.496327762724	   1.648436827033
39    6    0   	  -4.931395548806	  -2.667390604313	  -0.753649716619
40    1    0   	  -5.884440690730	  -3.095199550887	  -0.425570811931
41    1    0   	  -4.900364697064	  -2.693906909169	  -1.844201681196
42    1    0   	  -4.143500081595	  -3.323365054435	  -0.365375782245
43    6    0   	  -1.975474237412	   1.402407828690	   1.310369217652
44    1    0   	  -2.657680602765	   2.201233111026	   1.600532495522
45    1    0   	  -2.018462599259	   0.560297456721	   2.005920109312
46    1    0   	  -0.924921292785	   1.774619004491	   1.362463511126
47    6    0   	   1.187646695646	   3.563811348466	  -0.624502652039
48    1    0   	   2.082036248478	   3.861615605701	  -1.183919788263
49    1    0   	   0.371343310690	   3.441228129000	  -1.339030420531
50    1    0   	   0.943188611901	   4.400805231231	   0.037646093555
51    6    0   	   1.851062737797	  -1.860456303320	   2.625499141016
52    1    0   	   1.290739033110	  -2.454597753313	   3.355390536199
53    1    0   	   2.870663066763	  -2.242004082819	   2.601473867622
54    1    0   	   1.880194605201	  -0.832930663497	   3.013546983211
55    6    0   	   3.252701196975	  -2.479624874336	  -0.081753515195
56    6    0   	   3.858800929167	  -1.630330558990	  -1.205966254042
57    6    0   	   3.943892657601	  -0.130970153766	  -0.988544335977
58    1    0   	   3.351702529908	  -3.532527352102	  -0.372518291457
59    1    0   	   3.832973592250	  -2.361400085333	   0.835877960107
60    1    0   	   4.866179584643	  -2.002249452758	  -1.434622343570
61    1    0   	   3.278070675870	  -1.804662687234	  -2.123631970368
62    1    0   	   3.726389348177	  -0.211941794371	   1.085712662775
63    6    0   	   4.139253746444	   0.629305075905	  -2.275177748954
64    1    0   	   4.973465417467	   0.203334782011	  -2.843214970624
65    1    0   	   3.250108745014	   0.533672362705	  -2.910844105201
66    1    0   	   4.341257089408	   1.690449762928	  -2.133246010894
---------------------------------------------------------------------
SCF Done:  E(scf) =  -976.593436927743     A.U.


IRC-IRC-IRC-IRC-IRC-IRC-IRC-IRC-IRC-IRC-IRC-IRC-IRC-IRC-IRC-IRC-IRC-IRC
Pt  35  Step number   1 out of a maximum of  2639
NET REACTION COORDINATE UP TO THIS POINT =    35.00000
IRC-IRC-IRC-IRC-IRC-IRC-IRC-IRC-IRC-IRC-IRC-IRC-IRC-IRC-IRC-IRC-IRC-IRC
                         Input orientation:
---------------------------------------------------------------------
Center     Atomic      Atomic             Coordinates (Angstroms)
Number     Number       Type             X           Y           Z
---------------------------------------------------------------------
1     6    0   	  -0.299151951804	  -1.516427953821	   1.391693211886
2     6    0   	   1.168368522628	  -1.894259198565	   1.281657401380
3     6    0   	   2.610441311808	   2.423401765735	   1.172326871243
4     6    0   	   1.796719953982	  -2.165328431840	   0.134030563190
5     6    0   	   3.935116171027	   1.901421369105	   0.550787538990
6     6    0   	   3.876218640133	   0.435713103219	   0.219506602035
7     1    0   	   2.382032852463	   1.818737368946	   2.057679690382
8     1    0   	   4.730571221225	   2.078583271690	   1.283482921540
9     1    0   	   2.753031831518	   3.455196091898	   1.507865379948
10    1    0   	   4.181504252395	   2.504517855923	  -0.326657928303
11    1    0   	   1.219708249145	  -2.150417287679	  -0.792571719597
12    6    0   	   0.905084059371	   1.127005103578	   0.005942562814
13    1    0   	  -0.335041061190	  -0.582368299343	   1.966807491446
14    6    0   	   1.472345244584	   2.334308672933	   0.183352489315
15    1    0   	   1.278996024422	   0.324071583589	   0.629423647698
16    6    0   	  -1.357764432693	  -0.094582881049	  -0.654225355007
17    6    0   	  -1.159137748912	  -1.416269378596	   0.120466936838
18    6    0   	  -0.003010694836	   0.694912394481	  -1.084958979507
19    6    0   	  -2.125935327554	   0.994071057658	  -0.082038787237
20    1    0   	  -2.173857767455	  -1.747664976955	   0.364211507918
21    1    0   	  -0.798531309857	  -2.142819141068	  -0.614131014899
22    1    0   	  -1.812657597324	  -0.349048500213	  -1.616605430665
23    1    0   	  -0.265387011170	   1.500821721468	  -1.774523853981
24    1    0   	   0.498507231733	  -0.084504072076	  -1.672503633796
25    6    0   	  -4.471547678389	   1.213750116060	  -0.668485244750
26    6    0   	  -4.620837598989	  -0.231882237162	  -1.047253000579
27    6    0   	  -3.022625213061	   1.773836471575	  -0.948289493674
28    1    0   	  -5.135984842868	   1.836528172337	  -1.274884318805
29    1    0   	  -4.729690798830	   1.398628728363	   0.376350056427
30    1    0   	  -4.615319049948	  -0.431066167337	  -2.118758031121
31    1    0   	  -3.007278259947	   2.836002599917	  -0.687454779020
32    1    0   	  -2.790696538160	   1.633728177404	  -2.007265574198
33    6    0   	  -4.770009073470	  -1.272653076035	  -0.217166893262
34    1    0   	  -0.773726429582	  -2.259070786498	   2.046192126552
35    6    0   	  -4.813716723756	  -1.178757770702	   1.285829286766
36    1    0   	  -4.077992784717	  -1.859086699559	   1.731396714442
37    1    0   	  -4.631694391252	  -0.175393313136	   1.675219003741
38    1    0   	  -5.792535219227	  -1.505395870017	   1.652420343730
39    6    0   	  -4.928736822521	  -2.669309567662	  -0.755731676175
40    1    0   	  -5.879814102760	  -3.099729824561	  -0.425365799802
41    1    0   	  -4.901557860063	  -2.692917736727	  -1.846452738527
42    1    0   	  -4.138251805349	  -3.324843725113	  -0.371996935244
43    6    0   	  -1.973659784146	   1.407471997913	   1.309570068618
44    1    0   	  -2.654651340986	   2.206903265353	   1.600886863296
45    1    0   	  -2.016131749833	   0.565638666214	   2.005542738808
46    1    0   	  -0.922575726047	   1.778305104480	   1.359694519838
47    6    0   	   1.180525411831	   3.569724564606	  -0.617491684124
48    1    0   	   2.073251424284	   3.874413809832	  -1.175825243236
49    1    0   	   0.363863443344	   3.449104136333	  -1.331952474451
50    1    0   	   0.933966340329	   4.401435930393	   0.050538761508
51    6    0   	   1.845490719465	  -1.868013561561	   2.628073576963
52    1    0   	   1.282525572614	  -2.465322358258	   3.353321867826
53    1    0   	   2.864718285225	  -2.250605120072	   2.604896485285
54    1    0   	   1.874684572667	  -0.842572803549	   3.021457918042
55    6    0   	   3.253207724389	  -2.481056205994	  -0.077228918084
56    6    0   	   3.863668641814	  -1.635539422525	  -1.201864891908
57    6    0   	   3.949363116534	  -0.135689258258	  -0.988271069180
58    1    0   	   3.350214010585	  -3.534805888805	  -0.365629687758
59    1    0   	   3.831985621650	  -2.362327951852	   0.841306143521
60    1    0   	   4.871397075785	  -2.009083147228	  -1.426268537941
61    1    0   	   3.285695202802	  -1.811789525347	  -2.120894896516
62    1    0   	   3.720818605313	  -0.211343624875	   1.084894025955
63    6    0   	   4.153027531312	   0.620764288897	  -2.275832813247
64    1    0   	   4.991532803005	   0.193560572608	  -2.836589910085
65    1    0   	   3.268526228752	   0.522539725748	  -2.917481345563
66    1    0   	   4.353480938297	   1.682438066467	  -2.135698307017
---------------------------------------------------------------------
SCF Done:  E(scf) =  -976.593377763986     A.U.


IRC-IRC-IRC-IRC-IRC-IRC-IRC-IRC-IRC-IRC-IRC-IRC-IRC-IRC-IRC-IRC-IRC-IRC
Pt  36  Step number   1 out of a maximum of  2639
NET REACTION COORDINATE UP TO THIS POINT =    36.00000
IRC-IRC-IRC-IRC-IRC-IRC-IRC-IRC-IRC-IRC-IRC-IRC-IRC-IRC-IRC-IRC-IRC-IRC
                         Input orientation:
---------------------------------------------------------------------
Center     Atomic      Atomic             Coordinates (Angstroms)
Number     Number       Type             X           Y           Z
---------------------------------------------------------------------
1     6    0   	  -0.299557842518	  -1.510237324875	   1.389016162131
2     6    0   	   1.166661269729	  -1.894044687620	   1.282116997821
3     6    0   	   2.610019823617	   2.422078947279	   1.169596151082
4     6    0   	   1.797663225925	  -2.162567359092	   0.135335384041
5     6    0   	   3.933932874361	   1.900402349142	   0.546486678880
6     6    0   	   3.875671765569	   0.434073065152	   0.217924041514
7     1    0   	   2.382041305315	   1.816271501728	   2.054298719784
8     1    0   	   4.730529640285	   2.079428801007	   1.277534379863
9     1    0   	   2.753357797504	   3.453248570020	   1.506705880011
10    1    0   	   4.178192636014	   2.502241330480	  -0.332428860668
11    1    0   	   1.223753214701	  -2.141246080818	  -0.793077109998
12    6    0   	   0.904962496800	   1.128495564445	  -0.001279645590
13    1    0   	  -0.331941136793	  -0.573852620059	   1.960515078670
14    6    0   	   1.470425489156	   2.335828127384	   0.181876190715
15    1    0   	   1.281852362993	   0.322363616503	   0.616229907449
16    6    0   	  -1.360306508602	  -0.089377474378	  -0.656812083107
17    6    0   	  -1.157619146426	  -1.411420671158	   0.116160746694
18    6    0   	  -0.007268828464	   0.701548774005	  -1.090662453354
19    6    0   	  -2.127963793128	   0.998418674767	  -0.082256399857
20    1    0   	  -2.171512123199	  -1.747019734436	   0.357364300669
21    1    0   	  -0.793003232077	  -2.135275802130	  -0.619108606317
22    1    0   	  -1.817592767035	  -0.343993991182	  -1.618017592187
23    1    0   	  -0.272167285045	   1.510315753001	  -1.775924884564
24    1    0   	   0.491209606243	  -0.075747438031	  -1.683563673841
25    6    0   	  -4.475762254364	   1.212410354981	  -0.662039949387
26    6    0   	  -4.623577777607	  -0.232478719151	  -1.044048492172
27    6    0   	  -3.028938522724	   1.776277773957	  -0.945705595749
28    1    0   	  -5.143531080515	   1.835388764028	  -1.264566521424
29    1    0   	  -4.730644300349	   1.394230743945	   0.384141641845
30    1    0   	  -4.621557151262	  -0.428764293073	  -2.116098177686
31    1    0   	  -3.015582664397	   2.838371704479	  -0.684561586543
32    1    0   	  -2.799843453942	   1.637074507076	  -2.005421194905
33    6    0   	  -4.767891510213	  -1.275741558435	  -0.216233147784
34    1    0   	  -0.777632892944	  -2.248454157463	   2.045940356424
35    6    0   	  -4.806441859127	  -1.185872276437	   1.287150281289
36    1    0   	  -4.068452422767	  -1.866565744586	   1.728384828508
37    1    0   	  -4.624129725066	  -0.183318105765	   1.678514013877
38    1    0   	  -5.783637407634	  -1.514492606527	   1.656299995030
39    6    0   	  -4.926015955799	  -2.671240165739	  -0.757962917572
40    1    0   	  -5.875098957292	  -3.104301336850	  -0.425316741889
41    1    0   	  -4.902733091545	  -2.691878035506	  -1.848834869994
42    1    0   	  -4.132940129990	  -3.326336585144	  -0.378843528334
43    6    0   	  -1.971756287507	   1.412634547547	   1.308739118833
44    1    0   	  -2.651498690894	   2.212694987123	   1.601214076811
45    1    0   	  -2.013729839747	   0.571086776547	   2.005143745950
46    1    0   	  -0.920133510793	   1.782044435438	   1.356871419633
47    6    0   	   1.173290800419	   3.575650867334	  -0.610185574855
48    1    0   	   2.064319546489	   3.887385131814	  -1.167323571961
49    1    0   	   0.356278902078	   3.457058874898	  -1.324594823088
50    1    0   	   0.924580272111	   4.401886400592	   0.063854672686
51    6    0   	   1.839907483061	  -1.875285965816	   2.630594918004
52    1    0   	   1.274102939886	  -2.475326794125	   3.351352500688
53    1    0   	   2.858635775227	  -2.259259614742	   2.608394420426
54    1    0   	   1.869475187017	  -0.851834652356	   3.028972328869
55    6    0   	   3.253744673791	  -2.482581872702	  -0.072588331145
56    6    0   	   3.868562055202	  -1.640873309033	  -1.197647152467
57    6    0   	   3.954723732110	  -0.140523513915	  -0.987947731774
58    1    0   	   3.348769238159	  -3.537177118842	  -0.358586712422
59    1    0   	   3.830995699716	  -2.363302346629	   0.846860800000
60    1    0   	   4.876661623506	  -2.015963986008	  -1.417735175095
61    1    0   	   3.293389903792	  -1.819144848846	  -2.118032378365
62    1    0   	   3.715651956836	  -0.210814685000	   1.084116048993
63    6    0   	   4.166229119870	   0.612103860503	  -2.276447349790
64    1    0   	   5.009003858833	   0.183948735043	  -2.830028636168
65    1    0   	   3.286323129552	   0.510939579908	  -2.923837663505
66    1    0   	   4.364797285818	   1.674375164226	  -2.138222802413
---------------------------------------------------------------------
SCF Done:  E(scf) =  -976.593317687834     A.U.


IRC-IRC-IRC-IRC-IRC-IRC-IRC-IRC-IRC-IRC-IRC-IRC-IRC-IRC-IRC-IRC-IRC-IRC
Pt  37  Step number   1 out of a maximum of  2639
NET REACTION COORDINATE UP TO THIS POINT =    37.00000
IRC-IRC-IRC-IRC-IRC-IRC-IRC-IRC-IRC-IRC-IRC-IRC-IRC-IRC-IRC-IRC-IRC-IRC
                         Input orientation:
---------------------------------------------------------------------
Center     Atomic      Atomic             Coordinates (Angstroms)
Number     Number       Type             X           Y           Z
---------------------------------------------------------------------
1     6    0   	  -0.299895105087	  -1.503861689489	   1.386276982949
2     6    0   	   1.164974485005	  -1.893722790720	   1.282562434342
3     6    0   	   2.609624989985	   2.420648765668	   1.166851685423
4     6    0   	   1.798640591137	  -2.159891493414	   0.136692078957
5     6    0   	   3.932762644977	   1.899314279799	   0.542110865683
6     6    0   	   3.875228179396	   0.432343613752	   0.216348775316
7     1    0   	   2.382097608663	   1.813646158825	   2.050875319651
8     1    0   	   4.730533762561	   2.080288045052	   1.271443574528
9     1    0   	   2.753721329733	   3.451169583161	   1.505590894836
10    1    0   	   4.174800363527	   2.499865436275	  -0.338315705087
11    1    0   	   1.227878464631	  -2.132271700113	  -0.793506484368
12    6    0   	   0.904900084105	   1.129977835876	  -0.008664137216
13    1    0   	  -0.328677281132	  -0.565111829367	   1.954038592367
14    6    0   	   1.468494017548	   2.337312691557	   0.180431405534
15    1    0   	   1.284846172551	   0.320632497788	   0.602713955156
16    6    0   	  -1.362850488516	  -0.084089287359	  -0.659446152622
17    6    0   	  -1.156005224964	  -1.406474702032	   0.111772895666
18    6    0   	  -0.011534385324	   0.708261906891	  -1.096461706183
19    6    0   	  -2.129969952409	   1.002837097511	  -0.082484719403
20    1    0   	  -2.169018403025	  -1.746393617875	   0.350387211827
21    1    0   	  -0.787280833219	  -2.127546196912	  -0.624172789543
22    1    0   	  -1.822562009664	  -0.338863371874	  -1.619451941047
23    1    0   	  -0.278943252328	   1.519904525169	  -1.777353785056
24    1    0   	   0.483801499741	  -0.066915957387	  -1.694736853410
25    6    0   	  -4.479956916695	   1.211026456958	  -0.655491000896
26    6    0   	  -4.626292719863	  -0.233087164318	  -1.040824875004
27    6    0   	  -3.035290987056	   1.778751015008	  -0.943066672992
28    1    0   	  -5.151105888948	   1.834203151971	  -1.254049220640
29    1    0   	  -4.731506120073	   1.389721255784	   0.392045712241
30    1    0   	  -4.627828419670	  -0.426411817136	  -2.113411333094
31    1    0   	  -3.023967482347	   2.840763177018	  -0.681590690035
32    1    0   	  -2.809079030482	   1.640473716665	  -2.003526263656
33    6    0   	  -4.765690355083	  -1.278881604652	  -0.215362772128
34    1    0   	  -0.781501171289	  -2.237516653708	   2.045695294343
35    6    0   	  -4.799022965952	  -1.193117981954	   1.288385393764
36    1    0   	  -4.058890642268	  -1.874311122189	   1.725223793632
37    1    0   	  -4.616237487450	  -0.191431081582	   1.681771835897
38    1    0   	  -5.774632616860	  -1.523581441559	   1.660086719585
39    6    0   	  -4.923239776072	  -2.673180138680	  -0.760334646891
40    1    0   	  -5.870283272557	  -3.108922166513	  -0.425382278612
41    1    0   	  -4.903937092394	  -2.690785577632	  -1.851336992226
42    1    0   	  -4.127553787231	  -3.327831520548	  -0.385937914942
43    6    0   	  -1.969775036720	   1.417880730957	   1.307879317278
44    1    0   	  -2.648241024016	   2.218586824376	   1.601518532095
45    1    0   	  -2.011262427004	   0.576624088844	   2.004722595340
46    1    0   	  -0.917609024054	   1.785830217185	   1.354001597993
47    6    0   	   1.165892648010	   3.581600494788	  -0.602541518723
48    1    0   	   2.055172130121	   3.900612120153	  -1.158335456923
49    1    0   	   0.348553876730	   3.465087724415	  -1.316929298755
50    1    0   	   0.914926674402	   4.402120816101	   0.077656109430
51    6    0   	   1.834311791861	  -1.882225512275	   2.633059670748
52    1    0   	   1.265520844985	  -2.484622394459	   3.349475235188
53    1    0   	   2.852443174401	  -2.267836454002	   2.611950221039
54    1    0   	   1.864484903826	  -0.860669684978	   3.036109172719
55    6    0   	   3.254301342893	  -2.484205775643	  -0.067838008870
56    6    0   	   3.873470958871	  -1.646338067957	  -1.193317727939
57    6    0   	   3.960001416647	  -0.145483401249	  -0.987572792889
58    1    0   	   3.347352665397	  -3.539644933562	  -0.351396363186
59    1    0   	   3.829996711998	  -2.364330243498	   0.852533598854
60    1    0   	   4.881952944981	  -2.022913797008	  -1.409044655817
61    1    0   	   3.301130932194	  -1.826713344273	  -2.115045174615
62    1    0   	   3.710846724427	  -0.210350661144	   1.083380885575
63    6    0   	   4.178928117117	   0.603303970595	  -2.277029618278
64    1    0   	   5.025732823145	   0.174228298985	  -2.823695636019
65    1    0   	   3.303415283960	   0.499175584941	  -2.929792233271
66    1    0   	   4.375650400220	   1.666167397094	  -2.140805457395
---------------------------------------------------------------------
SCF Done:  E(scf) =  -976.593256537713     A.U.


IRC-IRC-IRC-IRC-IRC-IRC-IRC-IRC-IRC-IRC-IRC-IRC-IRC-IRC-IRC-IRC-IRC-IRC
Pt  38  Step number   1 out of a maximum of  2639
NET REACTION COORDINATE UP TO THIS POINT =    38.00000
IRC-IRC-IRC-IRC-IRC-IRC-IRC-IRC-IRC-IRC-IRC-IRC-IRC-IRC-IRC-IRC-IRC-IRC
                         Input orientation:
---------------------------------------------------------------------
Center     Atomic      Atomic             Coordinates (Angstroms)
Number     Number       Type             X           Y           Z
---------------------------------------------------------------------
1     6    0   	  -0.300168822690	  -1.497304816742	   1.383461707651
2     6    0   	   1.163305835586	  -1.893284373655	   1.282989458722
3     6    0   	   2.609261274350	   2.419118036240	   1.164086239481
4     6    0   	   1.799651800384	  -2.157310473901	   0.138101199069
5     6    0   	   3.931601637563	   1.898147312291	   0.537650626925
6     6    0   	   3.874865981536	   0.430516279868	   0.214772783837
7     1    0   	   2.382205046638	   1.810879715999	   2.047409102336
8     1    0   	   4.730582580520	   2.081143953485	   1.265197427894
9     1    0   	   2.754138590110	   3.448967080113	   1.504501938295
10    1    0   	   4.171324060572	   2.497374207225	  -0.344329916950
11    1    0   	   1.232086817728	  -2.123524415896	  -0.793862062624
12    6    0   	   0.904882655753	   1.131470027469	  -0.016205605853
13    1    0   	  -0.325267537962	  -0.556159243827	   1.947375021381
14    6    0   	   1.466548064093	   2.338771203191	   0.179020345298
15    1    0   	   1.287959864973	   0.318892163373	   0.588872440512
16    6    0   	  -1.365408881772	  -0.078707470149	  -0.662126168782
17    6    0   	  -1.154290047800	  -1.401428470847	   0.107283594126
18    6    0   	  -0.015828237389	   0.715079682462	  -1.102348739888
19    6    0   	  -2.131973380178	   1.007326251523	  -0.082714090434
20    1    0   	  -2.166363795783	  -1.745807946374	   0.343243077715
21    1    0   	  -0.781336705355	  -2.119602447561	  -0.629353282137
22    1    0   	  -1.827574957551	  -0.333639704614	  -1.620909470581
23    1    0   	  -0.285741530423	   1.529623183548	  -1.778795575930
24    1    0   	   0.476264903380	  -0.057973355957	  -1.706026870425
25    6    0   	  -4.484151474332	   1.209593964723	  -0.648832136234
26    6    0   	  -4.629001751449	  -0.233710100123	  -1.037580147535
27    6    0   	  -3.041705301859	   1.781255666458	  -0.940358501761
28    1    0   	  -5.158728106796	   1.832965675851	  -1.243323716137
29    1    0   	  -4.732297807295	   1.385092015578	   0.400066594255
30    1    0   	  -4.634175712558	  -0.424008394948	  -2.110693971283
31    1    0   	  -3.032458405134	   2.843174536810	  -0.678521631729
32    1    0   	  -2.818424317750	   1.643931510600	  -2.001565995366
33    6    0   	  -4.763398136293	  -1.282077330847	  -0.214555421223
34    1    0   	  -0.785336296524	  -2.226272206470	   2.045429256252
35    6    0   	  -4.791414921492	  -1.200500962093	   1.289533514092
36    1    0   	  -4.049259173035	  -1.882336191912	   1.721892399717
37    1    0   	  -4.607950736737	  -0.199741267464	   1.684985553919
38    1    0   	  -5.765469370387	  -1.532660054958	   1.663805523561
39    6    0   	  -4.920409695297	  -2.675132574183	  -0.762843653458
40    1    0   	  -5.865367638967	  -3.113592207449	  -0.425548720476
41    1    0   	  -4.905182371499	  -2.689644755636	  -1.853956444271
42    1    0   	  -4.122091817317	  -3.329333660440	  -0.393283270675
43    6    0   	  -1.967735583921	   1.423207120346	   1.307000709156
44    1    0   	  -2.644907254361	   2.224565213584	   1.601815427647
45    1    0   	  -2.008732032944	   0.582245941803	   2.004288198771
46    1    0   	  -0.915027902099	   1.789675033914	   1.351089991454
47    6    0   	   1.158327130163	   3.587568703445	  -0.594555927240
48    1    0   	   2.045773944217	   3.914059465032	  -1.148905409373
49    1    0   	   0.340638991046	   3.473200496871	  -1.308902348278
50    1    0   	   0.905067964589	   4.402147587363	   0.091942181555
51    6    0   	   1.828693206437	  -1.888806449628	   2.635469007359
52    1    0   	   1.256824503055	  -2.493267638075	   3.347668337227
53    1    0   	   2.846165892788	  -2.276208295555	   2.615552726042
54    1    0   	   1.859599969797	  -0.869061401276	   3.042913189215
55    6    0   	   3.254876349952	  -2.485933511856	  -0.062976119327
56    6    0   	   3.878389759806	  -1.651943702955	  -1.188878152212
57    6    0   	   3.965213773744	  -0.150581011472	  -0.987149742981
58    1    0   	   3.345962937124	  -3.542215129334	  -0.344052960513
59    1    0   	   3.828990318764	  -2.365413055047	   0.858323614656
60    1    0   	   4.887259909103	  -2.029950176893	  -1.400204954603
61    1    0   	   3.308906452943	  -1.834500940986	  -2.111930908548
62    1    0   	   3.706332644548	  -0.209955007277	   1.082676425715
63    6    0   	   4.191235321762	   0.594344765842	  -2.277577663022
64    1    0   	   5.041778493174	   0.164267055660	  -2.817603337706
65    1    0   	   3.319892333994	   0.487373272919	  -2.935361331553
66    1    0   	   4.386309139512	   1.657763420863	  -2.143413590936
---------------------------------------------------------------------
SCF Done:  E(scf) =  -976.593194068102     A.U.


IRC-IRC-IRC-IRC-IRC-IRC-IRC-IRC-IRC-IRC-IRC-IRC-IRC-IRC-IRC-IRC-IRC-IRC
Pt  39  Step number   1 out of a maximum of  2639
NET REACTION COORDINATE UP TO THIS POINT =    39.00000
IRC-IRC-IRC-IRC-IRC-IRC-IRC-IRC-IRC-IRC-IRC-IRC-IRC-IRC-IRC-IRC-IRC-IRC
                         Input orientation:
---------------------------------------------------------------------
Center     Atomic      Atomic             Coordinates (Angstroms)
Number     Number       Type             X           Y           Z
---------------------------------------------------------------------
1     6    0   	  -0.300374158661	  -1.490595613367	   1.380575509728
2     6    0   	   1.161666105420	  -1.892741317272	   1.283403774770
3     6    0   	   2.608938531046	   2.417506323336	   1.161307389623
4     6    0   	   1.800697767702	  -2.154863123534	   0.139567206726
5     6    0   	   3.930456181400	   1.896898089436	   0.533129785893
6     6    0   	   3.874557882915	   0.428594312317	   0.213200733890
7     1    0   	   2.382367777227	   1.808020507337	   2.043924344857
8     1    0   	   4.730675836966	   2.081963125134	   1.258834999732
9     1    0   	   2.754624836984	   3.446670107279	   1.503417600468
10    1    0   	   4.167798926781	   2.494770686345	  -0.350434612673
11    1    0   	   1.236366173550	  -2.115100368260	  -0.794139291282
12    6    0   	   0.904890033558	   1.132983738486	  -0.023860927736
13    1    0   	  -0.321713497328	  -0.547028408151	   1.940531622461
14    6    0   	   1.464605841744	   2.340203999308	   0.177644700815
15    1    0   	   1.291136015947	   0.317148264791	   0.574766180021
16    6    0   	  -1.367977573333	  -0.073249061498	  -0.664840126359
17    6    0   	  -1.152463562446	  -1.396303162702	   0.102695773827
18    6    0   	  -0.020173353815	   0.722039852410	  -1.108286465217
19    6    0   	  -2.133983683183	   1.011861090909	  -0.082936533311
20    1    0   	  -2.163537023910	  -1.745289287864	   0.335927599553
21    1    0   	  -0.775157205804	  -2.111456564128	  -0.634650734793
22    1    0   	  -1.832614677244	  -0.328337985444	  -1.622385208003
23    1    0   	  -0.292617020228	   1.539547250333	  -1.780152428476
24    1    0   	   0.468591143670	  -0.048804205670	  -1.717474022570
25    6    0   	  -4.488348409681	   1.208115888323	  -0.642096703442
26    6    0   	  -4.631711597583	  -0.234348523576	  -1.034333507445
27    6    0   	  -3.048173991286	   1.783775695099	  -0.937587098748
28    1    0   	  -5.166383168821	   1.831677924413	  -1.232444748671
29    1    0   	  -4.733045495447	   1.380357298145	   0.408163674552
30    1    0   	  -4.640611784127	  -0.421566993039	  -2.107963078716
31    1    0   	  -3.041035670485	   2.845590385916	  -0.675361395251
32    1    0   	  -2.827852018398	   1.647429628830	  -1.999542627381
33    6    0   	  -4.761019330001	  -1.285319589951	  -0.213816697589
34    1    0   	  -0.789133148504	  -2.214752007769	   2.045142065772
35    6    0   	  -4.783608218825	  -1.207991306681	   1.290589070918
36    1    0   	  -4.039539373481	  -1.890602335187	   1.718386690289
37    1    0   	  -4.599259336238	  -0.208211307623	   1.688130530499
38    1    0   	  -5.756134206696	  -1.541695797886	   1.667468331706
39    6    0   	  -4.917540960006	  -2.677094556779	  -0.765476663751
40    1    0   	  -5.860345294444	  -3.118315507933	  -0.425761490539
41    1    0   	  -4.906531748224	  -2.688460574278	  -1.856676462259
42    1    0   	  -4.116550708094	  -3.330827615386	  -0.400898867833
43    6    0   	  -1.965665078280	   1.428584633610	   1.306115296978
44    1    0   	  -2.641545077493	   2.230584145505	   1.602116735800
45    1    0   	  -2.006148641168	   0.587918575728	   2.003847910148
46    1    0   	  -0.912427069088	   1.793577488398	   1.348154595259
47    6    0   	   1.150671497794	   3.593525817838	  -0.586292927645
48    1    0   	   2.036194818536	   3.927584217498	  -1.139164264311
49    1    0   	   0.332561187354	   3.481398098109	  -1.300525051195
50    1    0   	   0.895189528804	   4.401988096633	   0.106613008446
51    6    0   	   1.823073670124	  -1.895012131631	   2.637831122186
52    1    0   	   1.248124474451	  -2.501369150319	   3.345915351099
53    1    0   	   2.839880033586	  -2.284213027272	   2.619182378568
54    1    0   	   1.854703604517	  -0.877005721185	   3.049451959074
55    6    0   	   3.255476830442	  -2.487767727479	  -0.058015674583
56    6    0   	   3.883285275193	  -1.657670299821	  -1.184351272905
57    6    0   	   3.970324978376	  -0.155797835490	  -0.986686343735
58    1    0   	   3.344628435752	  -3.544886856127	  -0.336578291714
59    1    0   	   3.827997809271	  -2.366545885326	   0.864207688779
60    1    0   	   4.892549203062	  -2.037040581588	  -1.391270445275
61    1    0   	   3.316660797598	  -1.842482695776	  -2.108700578241
62    1    0   	   3.702067599520	  -0.209632705566	   1.082002147742
63    6    0   	   4.203150259764	   0.585264507698	  -2.278089960479
64    1    0   	   5.057177893066	   0.154121696367	  -2.811722206919
65    1    0   	   3.335789772647	   0.475570509765	  -2.940600831199
66    1    0   	   4.396750618093	   1.649204302689	  -2.146023319867
---------------------------------------------------------------------
SCF Done:  E(scf) =  -976.593130408923     A.U.


IRC-IRC-IRC-IRC-IRC-IRC-IRC-IRC-IRC-IRC-IRC-IRC-IRC-IRC-IRC-IRC-IRC-IRC
Pt  40  Step number   1 out of a maximum of  2639
NET REACTION COORDINATE UP TO THIS POINT =    40.00000
IRC-IRC-IRC-IRC-IRC-IRC-IRC-IRC-IRC-IRC-IRC-IRC-IRC-IRC-IRC-IRC-IRC-IRC
                         Input orientation:
---------------------------------------------------------------------
Center     Atomic      Atomic             Coordinates (Angstroms)
Number     Number       Type             X           Y           Z
---------------------------------------------------------------------
1     6    0   	  -0.300500575629	  -1.484135166019	   1.377793805813
2     6    0   	   1.160159094662	  -1.892138415476	   1.283794227561
3     6    0   	   2.608662139163	   2.415914759283	   1.158688624969
4     6    0   	   1.801725928289	  -2.152690427402	   0.141010940616
5     6    0   	   3.929375117741	   1.895644912097	   0.528812083022
6     6    0   	   3.874298599367	   0.426694711290	   0.211721528590
7     1    0   	   2.382561098009	   1.805226659682	   2.040624326339
8     1    0   	   4.730796133654	   2.082700583454	   1.252724187169
9     1    0   	   2.755147366797	   3.444412898830	   1.502429719864
10    1    0   	   4.164409628823	   2.492213014605	  -0.356275544186
11    1    0   	   1.240468852448	  -2.107485932608	  -0.794322518746
12    6    0   	   0.904891675988	   1.134457215437	  -0.031160240846
13    1    0   	  -0.318246270104	  -0.538263023744	   1.933942040305
14    6    0   	   1.462764382898	   2.341556590722	   0.176395962591
15    1    0   	   1.294137044045	   0.315524564947	   0.561273736232
16    6    0   	  -1.370402130070	  -0.068023676685	  -0.667435376099
17    6    0   	  -1.150631072948	  -1.391390656575	   0.098279358289
18    6    0   	  -0.024331130209	   0.728768386168	  -1.113931109895
19    6    0   	  -2.135893039703	   1.016177449578	  -0.083137982176
20    1    0   	  -2.160713271917	  -1.744839950743	   0.328875554799
21    1    0   	  -0.769116886617	  -2.103594820651	  -0.639751504779
22    1    0   	  -1.837387348536	  -0.323260937362	  -1.623797866283
23    1    0   	  -0.299201942366	   1.549142390801	  -1.781340158943
24    1    0   	   0.461256020875	  -0.039871617752	  -1.728444620275
25    6    0   	  -4.492319794813	   1.206680265455	  -0.635683321726
26    6    0   	  -4.634272112421	  -0.234966464743	  -1.031278608199
27    6    0   	  -3.054330827268	   1.786168810415	  -0.934913789845
28    1    0   	  -5.173639449095	   1.830417211033	  -1.222065431224
29    1    0   	  -4.733739346563	   1.375795654894	   0.415860271787
30    1    0   	  -4.646771853760	  -0.419233338712	  -2.105385766157
31    1    0   	  -3.049214801560	   2.847874037401	  -0.672288683901
32    1    0   	  -2.836822327222	   1.650777370580	  -1.997576321514
33    6    0   	  -4.758695558258	  -1.288421575218	  -0.213185901973
34    1    0   	  -0.792677624077	  -2.203668358742	   2.044843534635
35    6    0   	  -4.776036587511	  -1.215155835482	   1.291500604081
36    1    0   	  -4.030241448896	  -1.898612044081	   1.714906104442
37    1    0   	  -4.590666750371	  -0.216345651711	   1.691030427035
38    1    0   	  -5.747132599469	  -1.550194511659	   1.670897407313
39    6    0   	  -4.914807377760	  -2.678957044946	  -0.768072218459
40    1    0   	  -5.855552162482	  -3.122792383789	  -0.426037006367
41    1    0   	  -4.907855361099	  -2.687317314852	  -1.859339714907
42    1    0   	  -4.111288397081	  -3.332256712746	  -0.408279736843
43    6    0   	  -1.963696507127	   1.433696123580	   1.305278114787
44    1    0   	  -2.638370370380	   2.236281595458	   1.602413835735
45    1    0   	  -2.003654397055	   0.593309392706	   2.003432764332
46    1    0   	  -0.909973291646	   1.797324848165	   1.345358975564
47    6    0   	   1.143413295274	   3.599150654229	  -0.578299707231
48    1    0   	   2.027030494170	   3.940256618570	  -1.129907106183
49    1    0   	   0.324746759028	   3.489241234380	  -1.292254101843
50    1    0   	   0.886075067366	   4.401814895345	   0.120693417959
51    6    0   	   1.817778640289	  -1.900571277403	   2.640040839337
52    1    0   	   1.239999875337	  -2.508729943698	   3.344269106227
53    1    0   	   2.834004939157	  -2.291332078014	   2.622623618803
54    1    0   	   1.849935028633	  -0.884179439003	   3.055522642070
55    6    0   	   3.256077812563	  -2.489604604446	  -0.053245721598
56    6    0   	   3.887878919136	  -1.663184849557	  -1.180008198168
57    6    0   	   3.975044986291	  -0.160827568978	  -0.986219347329
58    1    0   	   3.343435664266	  -3.547509922519	  -0.329407697751
59    1    0   	   3.827093557865	  -2.367669210853	   0.869840584936
60    1    0   	   4.897522181566	  -2.043776546072	  -1.382771543032
61    1    0   	   3.323947179668	  -1.850192972249	  -2.105551333639
62    1    0   	   3.698242840106	  -0.209397525824	   1.081396764405
63    6    0   	   4.214038687700	   0.576589050702	  -2.278555209435
64    1    0   	   5.071115492108	   0.144356015142	  -2.806397144537
65    1    0   	   3.350251913551	   0.464464606431	  -2.945265497785
66    1    0   	   4.406439160808	   1.640984855450	  -2.148494810001
---------------------------------------------------------------------
SCF Done:  E(scf) =  -976.593069231521     A.U.


IRC-IRC-IRC-IRC-IRC-IRC-IRC-IRC-IRC-IRC-IRC-IRC-IRC-IRC-IRC-IRC-IRC-IRC
Pt  41  Step number   1 out of a maximum of  2639
NET REACTION COORDINATE UP TO THIS POINT =    41.00000
IRC-IRC-IRC-IRC-IRC-IRC-IRC-IRC-IRC-IRC-IRC-IRC-IRC-IRC-IRC-IRC-IRC-IRC
                         Input orientation:
---------------------------------------------------------------------
Center     Atomic      Atomic             Coordinates (Angstroms)
Number     Number       Type             X           Y           Z
---------------------------------------------------------------------
1     6    0   	  -0.300500876494	  -1.476254814212	   1.374438831891
2     6    0   	   1.158425983641	  -1.891312047490	   1.284252456798
3     6    0   	   2.608365377212	   2.413962171098	   1.155536712419
4     6    0   	   1.802989636821	  -2.150338605399	   0.142806208929
5     6    0   	   3.928088518831	   1.894080800803	   0.523596624571
6     6    0   	   3.874020273734	   0.424356074061	   0.209948113692
7     1    0   	   2.382828578884	   1.801843652212	   2.036662431466
8     1    0   	   4.730964353471	   2.083547014829	   1.245303946484
9     1    0   	   2.755834972703	   3.441654657431	   1.501218260261
10    1    0   	   4.160300904064	   2.489051585297	  -0.363330093287
11    1    0   	   1.245421868840	  -2.099073562050	  -0.794405795600
12    6    0   	   0.904884394180	   1.136295020798	  -0.039947761475
13    1    0   	  -0.313765178558	  -0.527596761794	   1.925826503118
14    6    0   	   1.460572665757	   2.343140597892	   0.174942991389
15    1    0   	   1.297722025741	   0.313735726212	   0.544953500578
16    6    0   	  -1.373259198879	  -0.061786319003	  -0.670526003983
17    6    0   	  -1.148295724112	  -1.385482581201	   0.092984846325
18    6    0   	  -0.029351404641	   0.736961253453	  -1.120625217571
19    6    0   	  -2.138158217026	   1.021290675048	  -0.083362124929
20    1    0   	  -2.157099432858	  -1.744359772500	   0.320420786730
21    1    0   	  -0.761699541822	  -2.094045886538	  -0.645854381616
22    1    0   	  -1.843025959084	  -0.317221741272	  -1.625463395659
23    1    0   	  -0.307167204878	   1.560822567942	  -1.782484116144
24    1    0   	   0.452430879019	  -0.028779578662	  -1.741646327558
25    6    0   	  -4.496983927226	   1.204910390307	  -0.628027695873
26    6    0   	  -4.637305860033	  -0.235725175382	  -1.027657677471
27    6    0   	  -3.061650843901	   1.788964125788	  -0.931668565118
28    1    0   	  -5.182191125036	   1.828829908977	  -1.209635395660
29    1    0   	  -4.734478286086	   1.370277051399	   0.425005195265
30    1    0   	  -4.654178692052	  -0.416469789026	  -2.102283789540
31    1    0   	  -3.058940249876	   2.850522393474	  -0.668536230053
32    1    0   	  -2.847493849852	   1.654716661262	  -1.995153429144
33    6    0   	  -4.755869255847	  -1.292119183213	  -0.212527078770
34    1    0   	  -0.796774572520	  -2.190021164327	   2.044554697908
35    6    0   	  -4.766833787830	  -1.223701670147	   1.292424408812
36    1    0   	  -4.019098459390	  -1.908265177759	   1.710505023842
37    1    0   	  -4.580016247822	  -0.226092446739	   1.694292981500
38    1    0   	  -5.736232164669	  -1.560176702564	   1.674877370309
39    6    0   	  -4.911562616905	  -2.681143753620	  -0.771270109853
40    1    0   	  -5.849714732414	  -3.128174612523	  -0.426323456423
41    1    0   	  -4.909690352335	  -2.685899347848	  -1.862558167053
42    1    0   	  -4.104961529680	  -3.333844997403	  -0.417401193820
43    6    0   	  -1.961360787319	   1.439767355456	   1.304276103346
44    1    0   	  -2.634657149227	   2.242994638509	   1.602758449943
45    1    0   	  -2.000611207835	   0.599714091272	   2.002936546186
46    1    0   	  -0.907110840375	   1.801864916021	   1.342013205421
47    6    0   	   1.134767473724	   3.605704479600	  -0.568523408467
48    1    0   	   2.016042504247	   3.955169792358	  -1.118529587977
49    1    0   	   0.315361758254	   3.498536503404	  -1.282052472855
50    1    0   	   0.875372124738	   4.401286633615	   0.137723889385
51    6    0   	   1.811479659350	  -1.906824395341	   2.642602806360
52    1    0   	   1.230559416764	  -2.517343120447	   3.342155532107
53    1    0   	   2.827156405225	  -2.299060868378	   2.626656490307
54    1    0   	   1.843829443943	  -0.892402989592	   3.062724176036
55    6    0   	   3.256822022860	  -2.491890457078	  -0.047493397469
56    6    0   	   3.893227134580	  -1.669814451407	  -1.174775060019
57    6    0   	   3.980493621218	  -0.166894534474	  -0.985621931178
58    1    0   	   3.342127991017	  -3.550703939674	  -0.320789107356
59    1    0   	   3.826066331191	  -2.369023181655	   0.876587495359
60    1    0   	   4.903299249920	  -2.051765454391	  -1.372674574499
61    1    0   	   3.332430207786	  -1.859488364148	  -2.101653445503
62    1    0   	   3.693927572026	  -0.209181254374	   1.080665105018
63    6    0   	   4.226528193530	   0.566206254044	  -2.279025430384
64    1    0   	   5.086912204274	   0.132604687792	  -2.800268228398
65    1    0   	   3.366781230191	   0.451367584771	  -2.950394158227
66    1    0   	   4.417746973738	   1.631092428237	  -2.151364054916
---------------------------------------------------------------------
SCF Done:  E(scf) =  -976.592995450485     A.U.


IRC-IRC-IRC-IRC-IRC-IRC-IRC-IRC-IRC-IRC-IRC-IRC-IRC-IRC-IRC-IRC-IRC-IRC
Pt  42  Step number   1 out of a maximum of  2639
NET REACTION COORDINATE UP TO THIS POINT =    42.00000
IRC-IRC-IRC-IRC-IRC-IRC-IRC-IRC-IRC-IRC-IRC-IRC-IRC-IRC-IRC-IRC-IRC-IRC
                         Input orientation:
---------------------------------------------------------------------
Center     Atomic      Atomic             Coordinates (Angstroms)
Number     Number       Type             X           Y           Z
---------------------------------------------------------------------
1     6    0   	  -0.300458562307	  -1.469192470252	   1.371472677194
2     6    0   	   1.156929092004	  -1.890512055562	   1.284674720798
3     6    0   	   2.608137110377	   2.412197577827	   1.152751617165
4     6    0   	   1.804102468129	  -2.148373182640	   0.144428902837
5     6    0   	   3.926968454676	   1.892648195790	   0.518972639246
6     6    0   	   3.873776886806	   0.422235324584	   0.208391823055
7     1    0   	   2.383106583398	   1.798816335126	   2.033166493455
8     1    0   	   4.731145429629	   2.084244480809	   1.238716483241
9     1    0   	   2.756486260889	   3.439177166763	   1.500147811653
10    1    0   	   4.156676432840	   2.486199760470	  -0.369587352432
11    1    0   	   1.249769884935	  -2.091914688864	  -0.794443817088
12    6    0   	   0.904914016124	   1.137899616505	  -0.047756749427
13    1    0   	  -0.309712854386	  -0.518010719786	   1.918539315468
14    6    0   	   1.458648053819	   2.344517314880	   0.173681098120
15    1    0   	   1.300994743247	   0.312092208503	   0.530377832036
16    6    0   	  -1.375786236918	  -0.056264185653	  -0.673246864476
17    6    0   	  -1.146181390042	  -1.380247972943	   0.088295466109
18    6    0   	  -0.033823851350	   0.744271665559	  -1.126550641001
19    6    0   	  -2.140159709776	   1.025812401225	  -0.083535545435
20    1    0   	  -2.153832643512	  -1.744003600850	   0.312908463240
21    1    0   	  -0.755025708841	  -2.085551600518	  -0.651260191273
22    1    0   	  -1.848018063776	  -0.311874361673	  -1.626922012050
23    1    0   	  -0.314317413209	   1.571293944257	  -1.783375544776
24    1    0   	   0.444558949812	  -0.018803600482	  -1.753479164958
25    6    0   	  -4.501101648836	   1.203340242233	  -0.621243874064
26    6    0   	  -4.639988064575	  -0.236382946591	  -1.024502808954
27    6    0   	  -3.068116285825	   1.791445625173	  -0.928771998029
28    1    0   	  -5.189751308475	   1.827451090772	  -1.198594239769
29    1    0   	  -4.735118456684	   1.365342375403	   0.433115850663
30    1    0   	  -4.660775912294	  -0.413965432111	  -2.099597040836
31    1    0   	  -3.067538092244	   2.852870836497	  -0.665180269003
32    1    0   	  -2.856921096048	   1.658221963085	  -1.992986650190
33    6    0   	  -4.753321282878	  -1.295405883347	  -0.212022165902
34    1    0   	  -0.800365627228	  -2.177765347800	   2.044389643583
35    6    0   	  -4.758575798974	  -1.231312192231	   1.293169066501
36    1    0   	  -4.009216987855	  -1.916985479649	   1.706494630987
37    1    0   	  -4.570300893049	  -0.234803797129	   1.697111063057
38    1    0   	  -5.726513785090	  -1.568899218943	   1.678365185245
39    6    0   	  -4.908692835855	  -2.683076857245	  -0.774202116679
40    1    0   	  -5.844523026608	  -3.132940686680	  -0.426607512908
41    1    0   	  -4.911414310184	  -2.684610013983	  -1.865508983926
42    1    0   	  -4.099334879271	  -3.335261944526	  -0.425662990256
43    6    0   	  -1.959297876328	   1.445126137828	   1.303421821160
44    1    0   	  -2.631383627641	   2.248913866662	   1.603098748568
45    1    0   	  -1.997921263612	   0.605362371629	   2.002522431892
46    1    0   	  -0.904585297257	   1.805875380305	   1.339091029493
47    6    0   	   1.127062598682	   3.611515841002	  -0.559744540924
48    1    0   	   2.006213805533	   3.968412386286	  -1.108396205615
49    1    0   	   0.306935258449	   3.506822051902	  -1.272826187854
50    1    0   	   0.865917973347	   4.400769837008	   0.153013734683
51    6    0   	   1.805981027666	  -1.912065508839	   2.644875297303
52    1    0   	   1.222446310812	  -2.524792566659	   3.340326526272
53    1    0   	   2.821269955684	  -2.305352218073	   2.630236381285
54    1    0   	   1.838255891681	  -0.899362450446	   3.069053863039
55    6    0   	   3.257480382172	  -2.493992878327	  -0.042375927133
56    6    0   	   3.897910394898	  -1.675739370762	  -1.170135760332
57    6    0   	   3.985221311221	  -0.172317255370	  -0.985089116752
58    1    0   	   3.341002428194	  -3.553609842770	  -0.313131258030
59    1    0   	   3.825168342059	  -2.370275345413	   0.882574119180
60    1    0   	   4.908376110928	  -2.058854923373	  -1.363740502765
61    1    0   	   3.339886242504	  -1.867799600814	  -2.098190260141
62    1    0   	   3.690195796066	  -0.209033546068	   1.080058200598
63    6    0   	   4.237333124986	   0.556981357116	  -2.279460064045
64    1    0   	   5.100574614028	   0.122158069263	  -2.794979950375
65    1    0   	   3.381066048481	   0.439772336968	  -2.954845364732
66    1    0   	   4.427534124345	   1.622298912679	  -2.153929447989
---------------------------------------------------------------------
SCF Done:  E(scf) =  -976.592929175740     A.U.


IRC-IRC-IRC-IRC-IRC-IRC-IRC-IRC-IRC-IRC-IRC-IRC-IRC-IRC-IRC-IRC-IRC-IRC
Pt  43  Step number   1 out of a maximum of  2639
NET REACTION COORDINATE UP TO THIS POINT =    43.00000
IRC-IRC-IRC-IRC-IRC-IRC-IRC-IRC-IRC-IRC-IRC-IRC-IRC-IRC-IRC-IRC-IRC-IRC
                         Input orientation:
---------------------------------------------------------------------
Center     Atomic      Atomic             Coordinates (Angstroms)
Number     Number       Type             X           Y           Z
---------------------------------------------------------------------
1     6    0   	  -0.300331250335	  -1.461983424131	   1.368451737639
2     6    0   	   1.155459603895	  -1.889602825653	   1.285044724780
3     6    0   	   2.607910743679	   2.410421721960	   1.149933210567
4     6    0   	   1.805235060878	  -2.146520608718	   0.146056628158
5     6    0   	   3.925804564008	   1.891161366933	   0.514251489468
6     6    0   	   3.873525150066	   0.420047390782	   0.206810843339
7     1    0   	   2.383407332690	   1.795809868507	   2.029660267619
8     1    0   	   4.731326454631	   2.084948163841	   1.231945098766
9     1    0   	   2.757197924980	   3.436683647752	   1.499011174377
10    1    0   	   4.152912116681	   2.483233780098	  -0.375991585171
11    1    0   	   1.254160345787	  -2.085130975677	  -0.794436891581
12    6    0   	   0.904875979722	   1.139587269220	  -0.055564267196
13    1    0   	  -0.305455925110	  -0.508269850244	   1.911085154762
14    6    0   	   1.456676518456	   2.345903650205	   0.172465431722
15    1    0   	   1.304159592046	   0.310608599351	   0.515781037476
16    6    0   	  -1.378336679995	  -0.050680310424	  -0.675954552378
17    6    0   	  -1.144021109137	  -1.374929589495	   0.083585611682
18    6    0   	  -0.038325456569	   0.751639832702	  -1.132424369871
19    6    0   	  -2.142181397156	   1.030370116831	  -0.083662838691
20    1    0   	  -2.150452683361	  -1.743603639698	   0.305408949035
21    1    0   	  -0.748314534251	  -2.076899439057	  -0.656697127439
22    1    0   	  -1.853033460987	  -0.306460355484	  -1.628355991386
23    1    0   	  -0.321406704041	   1.581756585225	  -1.784239438273
24    1    0   	   0.436684963293	  -0.008758120178	  -1.765116570997
25    6    0   	  -4.505199581111	   1.201711179749	  -0.614388098416
26    6    0   	  -4.642643907156	  -0.237066685207	  -1.021336221238
27    6    0   	  -3.074621044292	   1.793940620630	  -0.925768431978
28    1    0   	  -5.197294659625	   1.825984439276	  -1.187431494905
29    1    0   	  -4.735724756549	   1.360303253846	   0.441274735500
30    1    0   	  -4.667394330118	  -0.411460381924	  -2.096865821226
31    1    0   	  -3.076221537914	   2.855211960401	  -0.661660052920
32    1    0   	  -2.866396341132	   1.661785186020	  -1.990704745516
33    6    0   	  -4.750715077721	  -1.298724943704	  -0.211586709749
34    1    0   	  -0.803861134056	  -2.165228812075	   2.044220924477
35    6    0   	  -4.750160075182	  -1.239005870691	   1.293795042361
36    1    0   	  -3.999291181156	  -1.925914522908	   1.702269061499
37    1    0   	  -4.560197222220	  -0.243653730070	   1.699824489018
38    1    0   	  -5.716655692088	  -1.577559178888	   1.681770396666
39    6    0   	  -4.905796506294	  -2.685003415279	  -0.777253838543
40    1    0   	  -5.839218494729	  -3.137764391311	  -0.426961731783
41    1    0   	  -4.913237914465	  -2.683276140216	  -1.868532965647
42    1    0   	  -4.093654281952	  -3.336621595256	  -0.434182993060
43    6    0   	  -1.957241285743	   1.450527086526	   1.302593086865
44    1    0   	  -2.628163275781	   2.254824383374	   1.603480560147
45    1    0   	  -1.995127217896	   0.611061154371	   2.002146861287
46    1    0   	  -0.902108188014	   1.810025173222	   1.336142861765
47    6    0   	   1.119334462991	   3.617213918837	  -0.550848210409
48    1    0   	   1.996273638949	   3.981353395102	  -1.098252544482
49    1    0   	   0.298317495655	   3.515051839348	  -1.263284332805
50    1    0   	   0.856729185424	   4.400154996034	   0.168342485705
51    6    0   	   1.800457996064	  -1.917043716631	   2.647056611094
52    1    0   	   1.214476056641	  -2.532163909709	   3.338328118159
53    1    0   	   2.815470932457	  -2.311081059579	   2.633732121289
54    1    0   	   1.832313599550	  -0.906097771049	   3.075353434839
55    6    0   	   3.258142453861	  -2.496169733070	  -0.037224272696
56    6    0   	   3.902568197347	  -1.681741777270	  -1.165439797897
57    6    0   	   3.989911651948	  -0.177829507907	  -0.984523148800
58    1    0   	   3.339899888723	  -3.556574420371	  -0.305428934618
59    1    0   	   3.824265776374	  -2.371571564272	   0.888589603914
60    1    0   	   4.913411434705	  -2.065981455648	  -1.354755424940
61    1    0   	   3.347308960019	  -1.876213331565	  -2.094637069165
62    1    0   	   3.686528668822	  -0.208932277800	   1.079418857009
63    6    0   	   4.248033524479	   0.547642462906	  -2.279826338825
64    1    0   	   5.113761069423	   0.111319920490	  -2.789876773818
65    1    0   	   3.395040414277	   0.428431694738	  -2.958955886549
66    1    0   	   4.437703923389	   1.613295646753	  -2.156428135029
---------------------------------------------------------------------
SCF Done:  E(scf) =  -976.592861780229     A.U.


IRC-IRC-IRC-IRC-IRC-IRC-IRC-IRC-IRC-IRC-IRC-IRC-IRC-IRC-IRC-IRC-IRC-IRC
Pt  44  Step number   1 out of a maximum of  2639
NET REACTION COORDINATE UP TO THIS POINT =    44.00000
IRC-IRC-IRC-IRC-IRC-IRC-IRC-IRC-IRC-IRC-IRC-IRC-IRC-IRC-IRC-IRC-IRC-IRC
                         Input orientation:
---------------------------------------------------------------------
Center     Atomic      Atomic             Coordinates (Angstroms)
Number     Number       Type             X           Y           Z
---------------------------------------------------------------------
1     6    0   	  -0.300111117254	  -1.454672160069	   1.365419418099
2     6    0   	   1.154044612616	  -1.888602069290	   1.285388289810
3     6    0   	   2.607675714938	   2.408613372677	   1.147091864309
4     6    0   	   1.806385712955	  -2.144756536192	   0.147684565024
5     6    0   	   3.924624850092	   1.889620816325	   0.509514176444
6     6    0   	   3.873283905252	   0.417806172843	   0.205235097895
7     1    0   	   2.383699772845	   1.792807910107	   2.026154111976
8     1    0   	   4.731488827060	   2.085618172221	   1.225138696051
9     1    0   	   2.757917398928	   3.434163372868	   1.497816985275
10    1    0   	   4.149113400392	   2.480189649054	  -0.382419551075
11    1    0   	   1.258557572732	  -2.078625920441	  -0.794398424081
12    6    0   	   0.904821959173	   1.141279899307	  -0.063419403087
13    1    0   	  -0.301023161605	  -0.498413156075	   1.903511104711
14    6    0   	   1.454680633014	   2.347249150795	   0.171259197684
15    1    0   	   1.307315686693	   0.309168320339	   0.501075250867
16    6    0   	  -1.380905283477	  -0.045106748479	  -0.678629505786
17    6    0   	  -1.141819057714	  -1.369590464253	   0.078903157981
18    6    0   	  -0.042855385807	   0.759004393884	  -1.138280266492
19    6    0   	  -2.144205140663	   1.034913945145	  -0.083751635236
20    1    0   	  -2.146975418795	  -1.743220104963	   0.297983232474
21    1    0   	  -0.741576816979	  -2.068185427447	  -0.662107428432
22    1    0   	  -1.858071352095	  -0.301066728447	  -1.629743936055
23    1    0   	  -0.328497393516	   1.592179371620	  -1.785079269908
24    1    0   	   0.428762076007	   0.001286475064	  -1.776671405576
25    6    0   	  -4.509256077479	   1.200062059193	  -0.607530185070
26    6    0   	  -4.645270072062	  -0.237750226212	  -1.018193366767
27    6    0   	  -3.081103693631	   1.796427248976	  -0.922709138788
28    1    0   	  -5.204773285040	   1.824487289757	  -1.176252513394
29    1    0   	  -4.736296651961	   1.355226582958	   0.449412762601
30    1    0   	  -4.673990024476	  -0.408953029320	  -2.094134038443
31    1    0   	  -3.084888204479	   2.857532004116	  -0.658052431872
32    1    0   	  -2.875834445258	   1.665358677308	  -1.988356694703
33    6    0   	  -4.748087049416	  -1.302030686183	  -0.211212165907
34    1    0   	  -0.807235672669	  -2.152476285673	   2.044104377235
35    6    0   	  -4.741707460715	  -1.246678886398	   1.294324432251
36    1    0   	  -3.989505115367	  -1.934980980285	   1.697933996019
37    1    0   	  -4.549806915585	  -0.252530068470	   1.702421619242
38    1    0   	  -5.706828579015	  -1.585974143687	   1.685078572487
39    6    0   	  -4.902909541454	  -2.686902027056	  -0.780366405337
40    1    0   	  -5.833896612838	  -3.142569423777	  -0.427357192631
41    1    0   	  -4.915117763802	  -2.681915676182	  -1.871593968521
42    1    0   	  -4.087985622487	  -3.337933819551	  -0.442804294541
43    6    0   	  -1.955196963246	   1.455910714646	   1.301795637913
44    1    0   	  -2.624985761287	   2.260687318071	   1.603897567316
45    1    0   	  -1.992291432079	   0.616743683007	   2.001804309278
46    1    0   	  -0.899670700826	   1.814215613116	   1.333208961659
47    6    0   	   1.111549305026	   3.622805622937	  -0.541829320861
48    1    0   	   1.986221661064	   3.994185199528	  -1.087967647017
49    1    0   	   0.289585966585	   3.523199642580	  -1.253547239514
50    1    0   	   0.847569289329	   4.399356765009	   0.183793630359
51    6    0   	   1.794991906986	  -1.921754407638	   2.649174804677
52    1    0   	   1.206744883025	  -2.539431677506	   3.336238078671
53    1    0   	   2.809839427365	  -2.316252226355	   2.637162735691
54    1    0   	   1.826118993945	  -0.912582023177	   3.081608407817
55    6    0   	   3.258810295571	  -2.498398137275	  -0.032083127175
56    6    0   	   3.907190549366	  -1.687770193530	  -1.160735773802
57    6    0   	   3.994548648450	  -0.183378679837	  -0.983934127172
58    1    0   	   3.338816308459	  -3.559574769272	  -0.297754015987
59    1    0   	   3.823378823020	  -2.372916203488	   0.894583461742
60    1    0   	   4.918401731681	  -2.073096446099	  -1.345785122983
61    1    0   	   3.354681182066	  -1.884657321815	  -2.091050234495
62    1    0   	   3.682949423463	  -0.208889146185	   1.078774948262
63    6    0   	   4.258586204124	   0.538286750110	  -2.280137593113
64    1    0   	   5.126686972921	   0.100437758356	  -2.784815216702
65    1    0   	   3.408798479814	   0.417146579444	  -2.962901739811
66    1    0   	   4.447828831941	   1.604251897257	  -2.158862273209
---------------------------------------------------------------------
SCF Done:  E(scf) =  -976.592793616950     A.U.


IRC-IRC-IRC-IRC-IRC-IRC-IRC-IRC-IRC-IRC-IRC-IRC-IRC-IRC-IRC-IRC-IRC-IRC
Pt  45  Step number   1 out of a maximum of  2639
NET REACTION COORDINATE UP TO THIS POINT =    45.00000
IRC-IRC-IRC-IRC-IRC-IRC-IRC-IRC-IRC-IRC-IRC-IRC-IRC-IRC-IRC-IRC-IRC-IRC
                         Input orientation:
---------------------------------------------------------------------
Center     Atomic      Atomic             Coordinates (Angstroms)
Number     Number       Type             X           Y           Z
---------------------------------------------------------------------
1     6    0   	  -0.299792924648	  -1.447245500201	   1.362365354112
2     6    0   	   1.152689838997	  -1.887494950568	   1.285704589501
3     6    0   	   2.607414529525	   2.406733093084	   1.144223816936
4     6    0   	   1.807563035491	  -2.143074188302	   0.149314797250
5     6    0   	   3.923428863666	   1.888008534557	   0.504775341126
6     6    0   	   3.873066459008	   0.415496552113	   0.203669536371
7     1    0   	   2.383949711048	   1.789739432255	   2.022619674827
8     1    0   	   4.731615151299	   2.086234153661	   1.218331484529
9     1    0   	   2.758615788610	   3.431565638427	   1.496598855245
10    1    0   	   4.145297533493	   2.477059490579	  -0.388844484953
11    1    0   	   1.262973511489	  -2.072381388865	  -0.794329501384
12    6    0   	   0.904750401689	   1.142975325629	  -0.071384960589
13    1    0   	  -0.296417434545	  -0.488432537760	   1.895808005451
14    6    0   	   1.452652970835	   2.348544173463	   0.170043084586
15    1    0   	   1.310487301506	   0.307757216367	   0.486153166887
16    6    0   	  -1.383512959628	  -0.039533796027	  -0.681275337247
17    6    0   	  -1.139570263405	  -1.364220254157	   0.074237103305
18    6    0   	  -0.047451643917	   0.766391918430	  -1.144157814088
19    6    0   	  -2.146243138020	   1.039452632400	  -0.083796020250
20    1    0   	  -2.143388693445	  -1.742860764422	   0.290620140606
21    1    0   	  -0.734801891937	  -2.059389378829	  -0.667508170893
22    1    0   	  -1.863169426088	  -0.295687653877	  -1.631079671762
23    1    0   	  -0.335655365599	   1.602605326644	  -1.785901498100
24    1    0   	   0.420710629348	   0.011367389418	  -1.788227917265
25    6    0   	  -4.513287102856	   1.198391812214	  -0.600656709521
26    6    0   	  -4.647875704319	  -0.238433720341	  -1.015065792135
27    6    0   	  -3.087584068008	   1.798912936508	  -0.919581219916
28    1    0   	  -5.212207232881	   1.822957434892	  -1.165040527134
29    1    0   	  -4.736848595259	   1.350105682801	   0.457544501700
30    1    0   	  -4.680577059989	  -0.406440382379	  -2.091393379734
31    1    0   	  -3.093561373663	   2.859837452846	  -0.654341716922
32    1    0   	  -2.885258374686	   1.668954129147	  -1.985930888399
33    6    0   	  -4.745434295489	  -1.305326007190	  -0.210891868171
34    1    0   	  -0.810483656742	  -2.139493125560	   2.044026911739
35    6    0   	  -4.733215678690	  -1.254333642088	   1.294763743098
36    1    0   	  -3.979884409513	  -1.944211815573	   1.693502922058
37    1    0   	  -4.539098150211	  -0.261440945132	   1.704903431370
38    1    0   	  -5.697043029119	  -1.594113646736	   1.688296667665
39    6    0   	  -4.900014006041	  -2.688775774398	  -0.783536687988
40    1    0   	  -5.828465721705	  -3.147419716453	  -0.427710792446
41    1    0   	  -4.917149811356	  -2.680518695063	  -1.874675332458
42    1    0   	  -4.082249442859	  -3.339152586861	  -0.451625086643
43    6    0   	  -1.953162079524	   1.461285870976	   1.301034048936
44    1    0   	  -2.621840243261	   2.266516590493	   1.604359008232
45    1    0   	  -1.989415321499	   0.622418439749	   2.001498635228
46    1    0   	  -0.897267147490	   1.818445681136	   1.330289010966
47    6    0   	   1.103690903540	   3.628299815099	  -0.532662280070
48    1    0   	   1.976033239952	   4.006926412988	  -1.077520986458
49    1    0   	   0.280714021995	   3.531292816110	  -1.243579691170
50    1    0   	   0.838436930112	   4.398364994017	   0.199413526241
51    6    0   	   1.789581431537	  -1.926177634529	   2.651233096667
52    1    0   	   1.199244089747	  -2.546562740537	   3.334058843567
53    1    0   	   2.804371013294	  -2.320856192987	   2.640547839942
54    1    0   	   1.819674324341	  -0.918798879694	   3.087812778975
55    6    0   	   3.259491005752	  -2.500682932568	  -0.026944253033
56    6    0   	   3.911799633475	  -1.693837795288	  -1.156014912767
57    6    0   	   3.999159550329	  -0.188977254570	  -0.983317277066
58    1    0   	   3.337750633374	  -3.562616981886	  -0.290096525041
59    1    0   	   3.822510790984	  -2.374318793175	   0.900567050189
60    1    0   	   4.923367922843	  -2.080222009693	  -1.336811276978
61    1    0   	   3.362030353714	  -1.893145306677	  -2.087424066319
62    1    0   	   3.679462662180	  -0.208921954516	   1.078128080257
63    6    0   	   4.269035607576	   0.528903975219	  -2.280386640242
64    1    0   	   5.139489740680	   0.089587963093	  -2.779715605097
65    1    0   	   3.422444399048	   0.405797468089	  -2.966738951802
66    1    0   	   4.457818765448	   1.595182992618	  -2.161225437593
---------------------------------------------------------------------
SCF Done:  E(scf) =  -976.592724494271     A.U.


IRC-IRC-IRC-IRC-IRC-IRC-IRC-IRC-IRC-IRC-IRC-IRC-IRC-IRC-IRC-IRC-IRC-IRC
Pt  46  Step number   1 out of a maximum of  2639
NET REACTION COORDINATE UP TO THIS POINT =    46.00000
IRC-IRC-IRC-IRC-IRC-IRC-IRC-IRC-IRC-IRC-IRC-IRC-IRC-IRC-IRC-IRC-IRC-IRC
                         Input orientation:
---------------------------------------------------------------------
Center     Atomic      Atomic             Coordinates (Angstroms)
Number     Number       Type             X           Y           Z
---------------------------------------------------------------------
1     6    0   	  -0.299377577696	  -1.439731163796	   1.359291806973
2     6    0   	   1.151405255992	  -1.886273511706	   1.285986569652
3     6    0   	   2.607118856051	   2.404756733714	   1.141344353586
4     6    0   	   1.808763317745	  -2.141487549387	   0.150937226432
5     6    0   	   3.922224445843	   1.886314941455	   0.500070840679
6     6    0   	   3.872884453263	   0.413115058014	   0.202124831068
7     1    0   	   2.384140999736	   1.786573763769	   2.019065732475
8     1    0   	   4.731695710207	   2.086773555175	   1.211582810526
9     1    0   	   2.759270424985	   3.428865625288	   1.495379727675
10    1    0   	   4.141497275441	   2.473850124694	  -0.395213029258
11    1    0   	   1.267387167195	  -2.066436351273	  -0.794234942630
12    6    0   	   0.904660424652	   1.144649197592	  -0.079463152435
13    1    0   	  -0.291668799468	  -0.478368979193	   1.888002062670
14    6    0   	   1.450596465674	   2.349760335747	   0.168819431191
15    1    0   	   1.313668661745	   0.306345412753	   0.471005151647
16    6    0   	  -1.386168503795	  -0.033982927425	  -0.683881736576
17    6    0   	  -1.137282798613	  -1.358839957305	   0.069595589013
18    6    0   	  -0.052126975852	   0.773789508475	  -1.150051940771
19    6    0   	  -2.148296475458	   1.043969547256	  -0.083791149316
20    1    0   	  -2.139699472244	  -1.742543301202	   0.283334698737
21    1    0   	  -0.728009727372	  -2.050535481077	  -0.672893886540
22    1    0   	  -1.868334503680	  -0.290343121429	  -1.632353712041
23    1    0   	  -0.342901913882	   1.613029579397	  -1.786687350169
24    1    0   	   0.412486984385	   0.021471228937	  -1.799800241863
25    6    0   	  -4.517284415938	   1.196710404925	  -0.593791206144
26    6    0   	  -4.650451818899	  -0.239110867608	  -1.011964392493
27    6    0   	  -3.094045400870	   1.801393325891	  -0.916390406537
28    1    0   	  -5.219576735015	   1.821403217923	  -1.153834777588
29    1    0   	  -4.737385633399	   1.344960793436	   0.465641652933
30    1    0   	  -4.687129488358	  -0.403928213039	  -2.088653508089
31    1    0   	  -3.102214373352	   2.862123910974	  -0.650533722398
32    1    0   	  -2.894639398113	   1.672565797348	  -1.983430741259
33    6    0   	  -4.742759789529	  -1.308595057557	  -0.210625553514
34    1    0   	  -0.813587997880	  -2.126336128884	   2.043975508173
35    6    0   	  -4.724713134049	  -1.261935163129	   1.295113561627
36    1    0   	  -3.970446560316	  -1.953546058959	   1.688999849500
37    1    0   	  -4.528135612497	  -0.270341453759	   1.707257311490
38    1    0   	  -5.687323574042	  -1.601964828021	   1.691417998424
39    6    0   	  -4.897106323980	  -2.690615978680	  -0.786749048529
40    1    0   	  -5.822966056329	  -3.152272087741	  -0.428063796266
41    1    0   	  -4.919248963276	  -2.679097000216	  -1.877767325826
42    1    0   	  -4.076481913311	  -3.340288718171	  -0.460552399985
43    6    0   	  -1.951146314687	   1.466629873670	   1.300316415617
44    1    0   	  -2.618732509723	   2.272294283671	   1.604869125721
45    1    0   	  -1.986524496874	   0.628060265461	   2.001233873524
46    1    0   	  -0.894905548450	   1.822685272483	   1.327403063858
47    6    0   	   1.095779348980	   3.633663189054	  -0.523358463934
48    1    0   	   1.965730564159	   4.019511217233	  -1.066947691065
49    1    0   	   0.271711185665	   3.539300479180	  -1.233379471520
50    1    0   	   0.829381959346	   4.397170307653	   0.215176143486
51    6    0   	   1.784265496094	  -1.930224533952	   2.653215798504
52    1    0   	   1.191971956987	  -2.553336312717	   3.331857360788
53    1    0   	   2.799068159198	  -2.324898675733	   2.643895007652
54    1    0   	   1.813121650222	  -0.924611804067	   3.093833145295
55    6    0   	   3.260184354070	  -2.503020094853	  -0.021827581361
56    6    0   	   3.916383752057	  -1.699926634931	  -1.151295672135
57    6    0   	   4.003733069948	  -0.194608664992	  -0.982674721593
58    1    0   	   3.336710722705	  -3.565694171626	  -0.282486351967
59    1    0   	   3.821664025455	  -2.375778568834	   0.906519270813
60    1    0   	   4.928296479879	  -2.087338930652	  -1.327865985847
61    1    0   	   3.369335148535	  -1.901650951491	  -2.083772970194
62    1    0   	   3.676095881639	  -0.209049409764	   1.077481728184
63    6    0   	   4.279362479904	   0.519532448268	  -2.280565713489
64    1    0   	   5.152236291617	   0.078913886635	  -2.774509795107
65    1    0   	   3.436030736591	   0.394309437978	  -2.970518515351
66    1    0   	   4.467511666739	   1.586152858495	  -2.163509121873
---------------------------------------------------------------------
SCF Done:  E(scf) =  -976.592654638475     A.U.


IRC-IRC-IRC-IRC-IRC-IRC-IRC-IRC-IRC-IRC-IRC-IRC-IRC-IRC-IRC-IRC-IRC-IRC
Pt  47  Step number   1 out of a maximum of  2639
NET REACTION COORDINATE UP TO THIS POINT =    47.00000
IRC-IRC-IRC-IRC-IRC-IRC-IRC-IRC-IRC-IRC-IRC-IRC-IRC-IRC-IRC-IRC-IRC-IRC
                         Input orientation:
---------------------------------------------------------------------
Center     Atomic      Atomic             Coordinates (Angstroms)
Number     Number       Type             X           Y           Z
---------------------------------------------------------------------
1     6    0   	  -0.298861962355	  -1.432118787489	   1.356185994284
2     6    0   	   1.150192661416	  -1.884934815391	   1.286232579419
3     6    0   	   2.606788137930	   2.402665974113	   1.138456440477
4     6    0   	   1.809987825785	  -2.140010817704	   0.152553813289
5     6    0   	   3.921019239378	   1.884530085094	   0.495414174938
6     6    0   	   3.872753825623	   0.410651976760	   0.200613683018
7     1    0   	   2.384272054411	   1.783293283027	   2.015495162923
8     1    0   	   4.731730807009	   2.087229627204	   1.204914838830
9     1    0   	   2.759872995144	   3.426045943617	   1.494163422697
10    1    0   	   4.137727266730	   2.470554327194	  -0.401509050444
11    1    0   	   1.271797947636	  -2.060813340301	  -0.794114640169
12    6    0   	   0.904557941304	   1.146284481268	  -0.087678232051
13    1    0   	  -0.286765287992	  -0.468203920121	   1.880062416388
14    6    0   	   1.448511771196	   2.350877217140	   0.167589015920
15    1    0   	   1.316867715517	   0.304896343657	   0.455573725157
16    6    0   	  -1.388876057891	  -0.028452967316	  -0.686458319067
17    6    0   	  -1.134948685032	  -1.353448120281	   0.064961970268
18    6    0   	  -0.056896232783	   0.781214694393	  -1.155978210997
19    6    0   	  -2.150366166905	   1.048463405669	  -0.083741303717
20    1    0   	  -2.135895322130	  -1.742279333671	   0.276104100033
21    1    0   	  -0.721184136905	  -2.041615019692	  -0.678282658444
22    1    0   	  -1.873574370160	  -0.285029821647	  -1.633574045806
23    1    0   	  -0.350267594787	   1.623493329328	  -1.787411889013
24    1    0   	   0.404047525472	   0.031639908832	  -1.811447955023
25    6    0   	  -4.521249231711	   1.195022325702	  -0.586934673687
26    6    0   	  -4.652998348465	  -0.239777839051	  -1.008888583807
27    6    0   	  -3.100488580836	   1.803872001765	  -0.913138139655
28    1    0   	  -5.226883233005	   1.819828675851	  -1.142637842468
29    1    0   	  -4.737908537297	   1.339797503109	   0.473703584473
30    1    0   	  -4.693650233043	  -0.401413303839	  -2.085913980045
31    1    0   	  -3.110845484188	   2.864394414601	  -0.646627366795
32    1    0   	  -2.903979326770	   1.676200278128	  -1.980858673793
33    6    0   	  -4.740056731231	  -1.311834531129	  -0.210411831604
34    1    0   	  -0.816552778654	  -2.112977931147	   2.043946945391
35    6    0   	  -4.716185692163	  -1.269481160551	   1.295375890708
36    1    0   	  -3.961129590394	  -1.962932987535	   1.684422800903
37    1    0   	  -4.516969124970	  -0.279217246015	   1.709482620511
38    1    0   	  -5.677630763229	  -1.609588844632	   1.694452905216
39    6    0   	  -4.894172136891	  -2.692419846126	  -0.790003648082
40    1    0   	  -5.817359394687	  -3.157143108248	  -0.428396996260
41    1    0   	  -4.921432657016	  -2.677644391738	  -1.880863636022
42    1    0   	  -4.070652751992	  -3.341322606800	  -0.469616393260
43    6    0   	  -1.949151212116	   1.471933887444	   1.299641715583
44    1    0   	  -2.615660503410	   2.278014327705	   1.605427677167
45    1    0   	  -1.983633600922	   0.633655875636	   2.001003263896
46    1    0   	  -0.892585844986	   1.826917588269	   1.324559999723
47    6    0   	   1.087799875011	   3.638885017535	  -0.513887240584
48    1    0   	   1.955292753023	   4.031943784215	  -1.056214999031
49    1    0   	   0.262558797977	   3.547222068478	  -1.222911818241
50    1    0   	   0.820391935136	   4.395743860357	   0.231127110995
51    6    0   	   1.779058173089	  -1.933837812673	   2.655121732463
52    1    0   	   1.184882350006	  -2.559563259720	   3.329705567785
53    1    0   	   2.793901259334	  -2.328434812390	   2.647226378173
54    1    0   	   1.806596365000	  -0.929915530472	   3.099563418235
55    6    0   	   3.260893827224	  -2.505418549785	  -0.016725804103
56    6    0   	   3.920941417800	  -1.706042423183	  -1.146572575703
57    6    0   	   4.008260571751	  -0.200278075739	  -0.982000006308
58    1    0   	   3.335705891593	  -3.568815299072	  -0.274915871689
59    1    0   	   3.820839281714	  -2.377300151797	   0.912448506951
60    1    0   	   4.933187177968	  -2.094448997721	  -1.318948184061
61    1    0   	   3.376590189557	  -1.910180867141	  -2.080089322609
62    1    0   	   3.672887459437	  -0.209284580599	   1.076852692869
63    6    0   	   4.289522653369	   0.510174019742	  -2.280672094804
64    1    0   	   5.164873218446	   0.068432732460	  -2.769208717962
65    1    0   	   3.449516714727	   0.382669378798	  -2.974219824952
66    1    0   	   4.476852235929	   1.577164677398	  -2.165723169977
---------------------------------------------------------------------
SCF Done:  E(scf) =  -976.592584058023     A.U.


IRC-IRC-IRC-IRC-IRC-IRC-IRC-IRC-IRC-IRC-IRC-IRC-IRC-IRC-IRC-IRC-IRC-IRC
Pt  48  Step number   1 out of a maximum of  2639
NET REACTION COORDINATE UP TO THIS POINT =    48.00000
IRC-IRC-IRC-IRC-IRC-IRC-IRC-IRC-IRC-IRC-IRC-IRC-IRC-IRC-IRC-IRC-IRC-IRC
                         Input orientation:
---------------------------------------------------------------------
Center     Atomic      Atomic             Coordinates (Angstroms)
Number     Number       Type             X           Y           Z
---------------------------------------------------------------------
1     6    0   	  -0.298242840839	  -1.424406117927	   1.353037759874
2     6    0   	   1.149054277003	  -1.883479046392	   1.286442670723
3     6    0   	   2.606426036285	   2.400458091641	   1.135564671120
4     6    0   	   1.811238965850	  -2.138658959604	   0.154168659018
5     6    0   	   3.919819087283	   1.882651285125	   0.490813869929
6     6    0   	   3.872690147210	   0.408102808569	   0.199154486331
7     1    0   	   2.384347237442	   1.779899525138	   2.011915496014
8     1    0   	   4.731724928456	   2.087610181438	   1.198333997367
9     1    0   	   2.760425561775	   3.423105374697	   1.492950198754
10    1    0   	   4.133989406395	   2.467161966246	  -0.407729432558
11    1    0   	   1.276208671139	  -2.055553075961	  -0.793966348779
12    6    0   	   0.904452565531	   1.147876170320	  -0.096035982817
13    1    0   	  -0.281698535315	  -0.457931328230	   1.871969954355
14    6    0   	   1.446401258216	   2.351886614180	   0.166358700352
15    1    0   	   1.320092780563	   0.303398485393	   0.439841045437
16    6    0   	  -1.391620403493	  -0.022943764224	  -0.689019203041
17    6    0   	  -1.132557196005	  -1.348044879494	   0.060321189269
18    6    0   	  -0.061747146744	   0.788671533948	  -1.161945126032
19    6    0   	  -2.152445553326	   1.052927535905	  -0.083656138943
20    1    0   	  -2.131964870119	  -1.742071907540	   0.268905862746
21    1    0   	  -0.714309583486	  -2.032625550985	  -0.683688120495
22    1    0   	  -1.878871184695	  -0.279745455951	  -1.634756068039
23    1    0   	  -0.357741572872	   1.634008412300	  -1.788068445183
24    1    0   	   0.395411600798	   0.041897350188	  -1.823195260075
25    6    0   	  -4.525174863850	   1.193331227616	  -0.580094164530
26    6    0   	  -4.655510736318	  -0.240431406891	  -1.005840562127
27    6    0   	  -3.106904357387	   1.806347509294	  -0.909830705421
28    1    0   	  -5.234116748123	   1.818237585836	  -1.131459034371
29    1    0   	  -4.738410104112	   1.334622499117	   0.481721884875
30    1    0   	  -4.700132048772	  -0.398896641945	  -2.083175761646
31    1    0   	  -3.119441809809	   2.866646035106	  -0.642623531635
32    1    0   	  -2.913270803124	   1.679860361021	  -1.978221296667
33    6    0   	  -4.737321500649	  -1.315037594471	  -0.210249794334
34    1    0   	  -0.819380937530	  -2.099409018766	   2.043932135402
35    6    0   	  -4.707628225783	  -1.276961554568	   1.295550472458
36    1    0   	  -3.951867283477	  -1.972298182712	   1.679767155936
37    1    0   	  -4.505675897164	  -0.288042300336	   1.711576173238
38    1    0   	  -5.667926854183	  -1.617058176183	   1.697407674963
39    6    0   	  -4.891202730660	  -2.694182920104	  -0.793294858820
40    1    0   	  -5.811669682255	  -3.162004557782	  -0.428750528075
41    1    0   	  -4.923630385254	  -2.676166848439	  -1.883962827986
42    1    0   	  -4.064782997770	  -3.342265252524	  -0.478756396901
43    6    0   	  -1.947183144483	   1.477178032274	   1.299006216838
44    1    0   	  -2.612632800349	   2.283654517542	   1.606031938357
45    1    0   	  -1.980758482331	   0.639178356050	   2.000794085556
46    1    0   	  -0.890314891138	   1.831121571891	   1.321770693553
47    6    0   	   1.079746962132	   3.643954025233	  -0.504234543588
48    1    0   	   1.944704819642	   4.044205637647	  -1.045330988562
49    1    0   	   0.253236343517	   3.555044551612	  -1.212142794138
50    1    0   	   0.811482908001	   4.394082222161	   0.247279744147
51    6    0   	   1.773967605541	  -1.936987947702	   2.656952595673
52    1    0   	   1.177948262730	  -2.565143465209	   3.327644150667
53    1    0   	   2.788852839569	  -2.331500010769	   2.650554596319
54    1    0   	   1.800176605392	  -0.934653739649	   3.104950828099
55    6    0   	   3.261623122435	  -2.507884831776	  -0.011632750614
56    6    0   	   3.925467056340	  -1.712184733068	  -1.141840359380
57    6    0   	   4.012732321574	  -0.205986066665	  -0.981280538004
58    1    0   	   3.334746035064	  -3.571986299116	  -0.267380085451
59    1    0   	   3.820040521331	  -2.378886197241	   0.918360089162
60    1    0   	   4.938034455585	  -2.101547356217	  -1.310062304192
61    1    0   	   3.383782955411	  -1.918729959931	  -2.076364841481
62    1    0   	   3.669880185681	  -0.209632706654	   1.076267379544
63    6    0   	   4.299418599491	   0.500840118583	  -2.280708481225
64    1    0   	   5.177165825436	   0.058051178288	  -2.763966939247
65    1    0   	   3.462668341251	   0.371034571273	  -2.977712783396
66    1    0   	   4.485909430878	   1.568198804413	  -2.167857650979
---------------------------------------------------------------------
SCF Done:  E(scf) =  -976.592512884130     A.U.


IRC-IRC-IRC-IRC-IRC-IRC-IRC-IRC-IRC-IRC-IRC-IRC-IRC-IRC-IRC-IRC-IRC-IRC
Pt  49  Step number   1 out of a maximum of  2639
NET REACTION COORDINATE UP TO THIS POINT =    49.00000
IRC-IRC-IRC-IRC-IRC-IRC-IRC-IRC-IRC-IRC-IRC-IRC-IRC-IRC-IRC-IRC-IRC-IRC
                         Input orientation:
---------------------------------------------------------------------
Center     Atomic      Atomic             Coordinates (Angstroms)
Number     Number       Type             X           Y           Z
---------------------------------------------------------------------
1     6    0   	  -0.297522215204	  -1.416546785325	   1.349820323502
2     6    0   	   1.147977173646	  -1.881896934413	   1.286617477213
3     6    0   	   2.606039722179	   2.398127871602	   1.132652533730
4     6    0   	   1.812518000596	  -2.137423003544	   0.155790811066
5     6    0   	   3.918622965230	   1.880665956000	   0.486246515386
6     6    0   	   3.872691554169	   0.405450551031	   0.197745406524
7     1    0   	   2.384374180412	   1.776385203982	   2.008310594360
8     1    0   	   4.731684704964	   2.087911467541	   1.191807646159
9     1    0   	   2.760944058555	   3.420036494400	   1.491728034811
10    1    0   	   4.130273951920	   2.463649915400	  -0.413907868299
11    1    0   	   1.280635642035	  -2.050636338623	  -0.793793454222
12    6    0   	   0.904358614001	   1.149435631235	  -0.104583922090
13    1    0   	  -0.276432682477	  -0.447484920539	   1.863647153060
14    6    0   	   1.444260604583	   2.352797370191	   0.165122159997
15    1    0   	   1.323396602597	   0.301850808174	   0.423696995471
16    6    0   	  -1.394408429641	  -0.017425917469	  -0.691584311177
17    6    0   	  -1.130092715819	  -1.342604644538	   0.055634999388
18    6    0   	  -0.066687048979	   0.796191415732	  -1.167981317123
19    6    0   	  -2.154542884924	   1.057381383775	  -0.083539189430
20    1    0   	  -2.127880811296	  -1.741937282341	   0.261674832599
21    1    0   	  -0.707329832618	  -2.023510451287	  -0.689153608432
22    1    0   	  -1.884238080122	  -0.274455186145	  -1.635918143310
23    1    0   	  -0.365335340096	   1.644613951524	  -1.788659872397
24    1    0   	   0.386551793070	   0.052278443305	  -1.835079210885
25    6    0   	  -4.529081744199	   1.191631709832	  -0.573241409320
26    6    0   	  -4.658000191593	  -0.241074520831	  -1.002805134810
27    6    0   	  -3.113321901232	   1.808833538851	  -0.906455255861
28    1    0   	  -5.241311767511	   1.816624546443	  -1.120255688598
29    1    0   	  -4.738897759823	   1.329417853037	   0.489730417275
30    1    0   	  -4.706603562205	  -0.396367562567	  -2.080426455353
31    1    0   	  -3.128041424638	   2.868891419530	  -0.638503672872
32    1    0   	  -2.922553701508	   1.683568424262	  -1.975509882807
33    6    0   	  -4.734537328544	  -1.318219861872	  -0.210134848756
34    1    0   	  -0.822099551756	  -2.085527678174	   2.043931468914
35    6    0   	  -4.698996697106	  -1.284412559074	   1.295644260116
36    1    0   	  -3.942545775760	  -1.981620018163	   1.675015315587
37    1    0   	  -4.494291981285	  -0.296840425069	   1.713556784808
38    1    0   	  -5.658132102680	  -1.624496532293	   1.700302303046
39    6    0   	  -4.888171652990	  -2.695915604141	  -0.796635129075
40    1    0   	  -5.805836117012	  -3.166898276126	  -0.429106258516
41    1    0   	  -4.925868088048	  -2.674656170507	  -1.887070517575
42    1    0   	  -4.058818518662	  -3.343107903390	  -0.488039127752
43    6    0   	  -1.945242639875	   1.482372392523	   1.298410640880
44    1    0   	  -2.609649316075	   2.289222868482	   1.606690161864
45    1    0   	  -1.977908155306	   0.644629017685	   2.000597413920
46    1    0   	  -0.888091738490	   1.835300335242	   1.319044629680
47    6    0   	   1.071566321961	   3.648901460975	  -0.494330220841
48    1    0   	   1.933888170771	   4.056387858754	  -1.034216099971
49    1    0   	   0.243676877065	   3.562814850683	  -1.200989253958
50    1    0   	   0.802594513779	   4.392153501800	   0.263757524001
51    6    0   	   1.768965488581	  -1.939675960728	   2.658721096917
52    1    0   	   1.171118759227	  -2.570064772354	   3.325684743606
53    1    0   	   2.783885048669	  -2.334120078101	   2.653901895260
54    1    0   	   1.793858195444	  -0.938823820084	   3.110006176942
55    6    0   	   3.262371691561	  -2.510434337598	  -0.006518468022
56    6    0   	   3.929983842378	  -1.718391183525	  -1.137072874160
57    6    0   	   4.017175341866	  -0.211768545925	  -0.980507869006
58    1    0   	   3.333818527207	  -3.575227831857	  -0.259835246792
59    1    0   	   3.819259168337	  -2.380547866877	   0.924288247014
60    1    0   	   4.942862937210	  -2.108681489724	  -1.301164033501
61    1    0   	   3.390947167331	  -1.927341561668	  -2.072580927796
62    1    0   	   3.667051651927	  -0.210095035067	   1.075733165444
63    6    0   	   4.309068023783	   0.491480772843	  -2.280682959916
64    1    0   	   5.189077131597	   0.047653757880	  -2.758850429155
65    1    0   	   3.475434568565	   0.359430360163	  -2.980955697954
66    1    0   	   4.494782742138	   1.559191955594	  -2.169917287043
---------------------------------------------------------------------
SCF Done:  E(scf) =  -976.592440788690     A.U.


IRC-IRC-IRC-IRC-IRC-IRC-IRC-IRC-IRC-IRC-IRC-IRC-IRC-IRC-IRC-IRC-IRC-IRC
Pt  50  Step number   1 out of a maximum of  2639
NET REACTION COORDINATE UP TO THIS POINT =    50.00000
IRC-IRC-IRC-IRC-IRC-IRC-IRC-IRC-IRC-IRC-IRC-IRC-IRC-IRC-IRC-IRC-IRC-IRC
                         Input orientation:
---------------------------------------------------------------------
Center     Atomic      Atomic             Coordinates (Angstroms)
Number     Number       Type             X           Y           Z
---------------------------------------------------------------------
1     6    0   	  -0.296765037134	  -1.409009388065	   1.346705938986
2     6    0   	   1.147018837483	  -1.880264898174	   1.286736859503
3     6    0   	   2.605654946067	   2.395818216423	   1.129905036381
4     6    0   	   1.813751211511	  -2.136337246184	   0.157313307089
5     6    0   	   3.917488331929	   1.878684909103	   0.481962320354
6     6    0   	   3.872739617198	   0.402841562410	   0.196455294044
7     1    0   	   2.384359749047	   1.772947297640	   2.004896625159
8     1    0   	   4.731617830836	   2.088109732584	   1.185683056531
9     1    0   	   2.761424044975	   3.417016070502	   1.490599562929
10    1    0   	   4.126770071760	   2.460215401618	  -0.419708323287
11    1    0   	   1.284829755727	  -2.046246210926	  -0.793626773073
12    6    0   	   0.904266412438	   1.150895589441	  -0.112775807025
13    1    0   	  -0.271357378800	  -0.437501370595	   1.855629708750
14    6    0   	   1.442203257119	   2.353593697572	   0.163978448010
15    1    0   	   1.326555835196	   0.300375844128	   0.408199039311
16    6    0   	  -1.397076841055	  -0.012192324638	  -0.694020362263
17    6    0   	  -1.127708775021	  -1.337430045267	   0.051150540850
18    6    0   	  -0.071392675511	   0.803308676828	  -1.173737284618
19    6    0   	  -2.156545164647	   1.061580811322	  -0.083396758405
20    1    0   	  -2.123907984565	  -1.741859684841	   0.254796608237
21    1    0   	  -0.700655471875	  -2.014794925583	  -0.694392624414
22    1    0   	  -1.889359963308	  -0.269424916221	  -1.637015383090
23    1    0   	  -0.372520040774	   1.654613247659	  -1.789279351822
24    1    0   	   0.378080681263	   0.062034909242	  -1.846280729239
25    6    0   	  -4.532763586153	   1.190021678874	  -0.566761946539
26    6    0   	  -4.660327172799	  -0.241672716302	  -0.999951375319
27    6    0   	  -3.119388389787	   1.811203347435	  -0.903197290175
28    1    0   	  -5.248078908040	   1.815082279525	  -1.109669050339
29    1    0   	  -4.739369131701	   1.324481645973	   0.497281690794
30    1    0   	  -4.712691546641	  -0.393970505494	  -2.077824917063
31    1    0   	  -3.136180795257	   2.871014543120	  -0.634481862504
32    1    0   	  -2.931315057417	   1.687145507054	  -1.972876041294
33    6    0   	  -4.731862796880	  -1.321207830744	  -0.210065337731
34    1    0   	  -0.824564616277	  -2.072230457614	   2.043888671067
35    6    0   	  -4.690777336399	  -1.291428881231	   1.295667418391
36    1    0   	  -3.933626376171	  -1.990333650893	   1.670441779567
37    1    0   	  -4.483535807804	  -0.305118192995	   1.715342191516
38    1    0   	  -5.648768960277	  -1.631582493844	   1.702991862005
39    6    0   	  -4.885243269989	  -2.697528563241	  -0.799830085303
40    1    0   	  -5.800254912534	  -3.171507647985	  -0.429524387168
41    1    0   	  -4.927887050776	  -2.673216575859	  -1.890024898423
42    1    0   	  -4.053141797997	  -3.343856051171	  -0.496826076225
43    6    0   	  -1.943454839838	   1.487211678301	   1.297897291983
44    1    0   	  -2.606891475184	   2.294393289659	   1.607380307031
45    1    0   	  -1.975264783276	   0.649682726828	   2.000425634535
46    1    0   	  -0.886053195535	   1.839202433535	   1.316550727260
47    6    0   	   1.063734394910	   3.653489349030	  -0.484771049321
48    1    0   	   1.923471202637	   4.067786097925	  -1.023608836496
49    1    0   	   0.234412061099	   3.570111038080	  -1.190093431001
50    1    0   	   0.794275614342	   4.390194692510	   0.279558823076
51    6    0   	   1.764329767311	  -1.941755105528	   2.660325561223
52    1    0   	   1.164752205121	  -2.574035969912	   3.323943762413
53    1    0   	   2.779262440444	  -2.336182173373	   2.657080661694
54    1    0   	   1.788025488384	  -0.942190081871	   3.114439825695
55    6    0   	   3.263090375945	  -2.512923938201	  -0.001678727844
56    6    0   	   3.934253139907	  -1.724326057705	  -1.132543504220
57    6    0   	   4.021342667272	  -0.217309349235	  -0.979738480341
58    1    0   	   3.332947163525	  -3.578362450269	  -0.252708320361
59    1    0   	   3.818526487608	  -2.382203874580	   0.929897917632
60    1    0   	   4.947423534254	  -2.115465375146	  -1.292734130157
61    1    0   	   3.397715637573	  -1.935555810818	  -2.068966716893
62    1    0   	   3.664528568499	  -0.210647810831	   1.075272053627
63    6    0   	   4.317967444384	   0.482599458338	  -2.280616926646
64    1    0   	   5.200037855614	   0.037831776984	  -2.754106690479
65    1    0   	   3.487182462164	   0.348424055785	  -2.983841994173
66    1    0   	   4.502946362902	   1.550641885912	  -2.171817403830
---------------------------------------------------------------------
SCF Done:  E(scf) =  -976.592371926762     A.U.


IRC-IRC-IRC-IRC-IRC-IRC-IRC-IRC-IRC-IRC-IRC-IRC-IRC-IRC-IRC-IRC-IRC-IRC
Pt  51  Step number   1 out of a maximum of  2639
NET REACTION COORDINATE UP TO THIS POINT =    51.00000
IRC-IRC-IRC-IRC-IRC-IRC-IRC-IRC-IRC-IRC-IRC-IRC-IRC-IRC-IRC-IRC-IRC-IRC
                         Input orientation:
---------------------------------------------------------------------
Center     Atomic      Atomic             Coordinates (Angstroms)
Number     Number       Type             X           Y           Z
---------------------------------------------------------------------
1     6    0   	  -0.295732558322	  -1.399933830767	   1.342881947993
2     6    0   	   1.145953101242	  -1.878158863876	   1.286809913225
3     6    0   	   2.605206587934	   2.392978658340	   1.126595086106
4     6    0   	   1.815226722395	  -2.135211160204	   0.159109010884
5     6    0   	   3.916169181275	   1.876184823633	   0.476920069290
6     6    0   	   3.872856063406	   0.399610445165	   0.194978378218
7     1    0   	   2.384302695298	   1.768832679473	   2.000827814430
8     1    0   	   4.731506314740	   2.088187577184	   1.178496654377
9     1    0   	   2.762027837798	   3.413337618411	   1.489163702765
10    1    0   	   4.122717910775	   2.455962469207	  -0.426522725110
11    1    0   	   1.289791840733	  -2.041532719657	  -0.793410837352
12    6    0   	   0.904164753805	   1.152680758345	  -0.122707448483
13    1    0   	  -0.265106261871	  -0.425566889855	   1.845825704839
14    6    0   	   1.439750676473	   2.354443319821	   0.162619652691
15    1    0   	   1.330364899677	   0.298730453264	   0.389307438527
16    6    0   	  -1.400279717910	  -0.005993799823	  -0.696898698828
17    6    0   	  -1.124744174579	  -1.331266177246	   0.045729273301
18    6    0   	  -0.077069408810	   0.811855926239	  -1.180570810363
19    6    0   	  -2.158947022183	   1.066497266225	  -0.083182520978
20    1    0   	  -2.118899073518	  -1.741950536018	   0.246491115462
21    1    0   	  -0.692504779004	  -2.004207494514	  -0.700743911570
22    1    0   	  -1.895444971443	  -0.263454445233	  -1.638301688902
23    1    0   	  -0.381131300138	   1.666552964165	  -1.789892744519
24    1    0   	   0.367754442451	   0.073738734140	  -1.859535328339
25    6    0   	  -4.537074192745	   1.188084293273	  -0.559097722742
26    6    0   	  -4.663047647593	  -0.242388882976	  -0.996572006541
27    6    0   	  -3.126555472971	   1.813978727266	  -0.899250833403
28    1    0   	  -5.255993018215	   1.813181315468	  -1.097144454653
29    1    0   	  -4.739879260815	   1.318622942930	   0.506161402884
30    1    0   	  -4.719873369364	  -0.391171645372	  -2.074689224316
31    1    0   	  -3.145787708315	   2.873470849797	  -0.629564248213
32    1    0   	  -2.941646921058	   1.691393738215	  -1.969649424133
33    6    0   	  -4.728649081954	  -1.324707265976	  -0.210029189388
34    1    0   	  -0.827331612707	  -2.056125827771	   2.043728195728
35    6    0   	  -4.680993525113	  -1.299660561542	   1.295575552595
36    1    0   	  -3.922918359170	  -2.000396552258	   1.664899769115
37    1    0   	  -4.470929501797	  -0.314807015955	   1.717287982965
38    1    0   	  -5.637540590692	  -1.640088507866	   1.706059524469
39    6    0   	  -4.881699791868	  -2.699391742276	  -0.803640356843
40    1    0   	  -5.793434877852	  -3.177015311164	  -0.429999695433
41    1    0   	  -4.930338307088	  -2.671490588774	  -1.893470059821
42    1    0   	  -4.046312655856	  -3.344561796799	  -0.507380063262
43    6    0   	  -1.941429362791	   1.492808876016	   1.297356862832
44    1    0   	  -2.603770943788	   2.300326433567	   1.608279700684
45    1    0   	  -1.972226552388	   0.655485284652	   2.000228889730
46    1    0   	  -0.883779324252	   1.843764851571	   1.313744389311
47    6    0   	   1.054354228402	   3.658699391776	  -0.473076288961
48    1    0   	   1.910881798943	   4.081089320955	  -1.010648250355
49    1    0   	   0.223175370010	   3.578613441234	  -1.176597687983
50    1    0   	   0.784582209541	   4.387416473844	   0.298701044676
51    6    0   	   1.758945155348	  -1.943539255148	   2.662120664229
52    1    0   	   1.157295185628	  -2.577697415869	   3.322050094803
53    1    0   	   2.773846363309	  -2.338052821952	   2.660872587181
54    1    0   	   1.781323125130	  -0.945316377037	   3.119146113345
55    6    0   	   3.263938265766	  -2.515967061054	   0.004075243543
56    6    0   	   3.939261059241	  -1.731431047309	  -1.127128047135
57    6    0   	   4.026218632318	  -0.223969892082	  -0.978757953879
58    1    0   	   3.331936243752	  -3.582146343628	  -0.244256855934
59    1    0   	   3.817647220405	  -2.384234807458	   0.936555679896
60    1    0   	   4.952750370663	  -2.123534316043	  -1.282735960356
61    1    0   	   3.405647304260	  -1.945361595527	  -2.064585456316
62    1    0   	   3.661721307335	  -0.211454369215	   1.074766494110
63    6    0   	   4.328187365940	   0.472034790487	  -2.280447554856
64    1    0   	   5.212701473456	   0.026370612081	  -2.748466497021
65    1    0   	   3.500754487229	   0.335141377223	  -2.987031208280
66    1    0   	   4.512088080383	   1.540500166186	  -2.174014261383
---------------------------------------------------------------------
SCF Done:  E(scf) =  -976.592289500155     A.U.


IRC-IRC-IRC-IRC-IRC-IRC-IRC-IRC-IRC-IRC-IRC-IRC-IRC-IRC-IRC-IRC-IRC-IRC
Pt  52  Step number   1 out of a maximum of  2639
NET REACTION COORDINATE UP TO THIS POINT =    52.00000
IRC-IRC-IRC-IRC-IRC-IRC-IRC-IRC-IRC-IRC-IRC-IRC-IRC-IRC-IRC-IRC-IRC-IRC
                         Input orientation:
---------------------------------------------------------------------
Center     Atomic      Atomic             Coordinates (Angstroms)
Number     Number       Type             X           Y           Z
---------------------------------------------------------------------
1     6    0   	  -0.294774585072	  -1.391847366466	   1.339374278780
2     6    0   	   1.145073538474	  -1.876186197053	   1.286835857737
3     6    0   	   2.604847843359	   2.390367113214	   1.123677158495
4     6    0   	   1.816556403323	  -2.134411115621	   0.160713223049
5     6    0   	   3.915042237236	   1.873850724177	   0.472512303455
6     6    0   	   3.872992669760	   0.396630494284	   0.193738816528
7     1    0   	   2.384261784935	   1.765109058741	   1.997243704183
8     1    0   	   4.731433737653	   2.088121518151	   1.172214507398
9     1    0   	   2.762612887898	   3.409981276900	   1.487907162468
10    1    0   	   4.119210399581	   2.452073879902	  -0.432490647654
11    1    0   	   1.294173701578	  -2.037787785284	  -0.793213267682
12    6    0   	   0.904105140579	   1.154251955536	  -0.131630668682
13    1    0   	  -0.259548549707	  -0.414914041625	   1.836951670978
14    6    0   	   1.437609367428	   2.355150365430	   0.161434815796
15    1    0   	   1.333848204633	   0.297166005681	   0.372224302655
16    6    0   	  -1.403152800876	  -0.000487060704	  -0.699487903960
17    6    0   	  -1.122015512000	  -1.325813812273	   0.040768383644
18    6    0   	  -0.082195649002	   0.819589691603	  -1.186674433991
19    6    0   	  -2.161110839116	   1.070809114960	  -0.082962042207
20    1    0   	  -2.114307151915	  -1.742200920847	   0.238886793067
21    1    0   	  -0.685066505697	  -1.994705642901	  -0.706567864394
22    1    0   	  -1.900873149783	  -0.258105520838	  -1.639491994113
23    1    0   	  -0.388960749935	   1.677390717636	  -1.790283558525
24    1    0   	   0.358397790733	   0.084362221345	  -1.871497533392
25    6    0   	  -4.540912742179	   1.186379980721	  -0.552324004289
26    6    0   	  -4.665440626551	  -0.243011089411	  -0.993610435747
27    6    0   	  -3.132917646360	   1.816455840158	  -0.895704146446
28    1    0   	  -5.263013130247	   1.811510035873	  -1.086082948888
29    1    0   	  -4.740386476535	   1.313425833388	   0.514008440310
30    1    0   	  -4.726196934115	  -0.388672947290	  -2.071947969246
31    1    0   	  -3.154295715379	   2.875651937748	  -0.625105119452
32    1    0   	  -2.950785288335	   1.695231406328	  -1.966743298685
33    6    0   	  -4.725753155072	  -1.327799966957	  -0.210033244884
34    1    0   	  -0.829754758714	  -2.041770581460	   2.043497863176
35    6    0   	  -4.672281902812	  -1.306943258007	   1.295459344955
36    1    0   	  -3.913278125989	  -2.009189860764	   1.659947858699
37    1    0   	  -4.459871378007	  -0.323349311807	   1.718985062770
38    1    0   	  -5.627498579808	  -1.647758318163	   1.708736836748
39    6    0   	  -4.878479532252	  -2.701038108213	  -0.807051015164
40    1    0   	  -5.787327234536	  -3.181888452858	  -0.430485061313
41    1    0   	  -4.932395389864	  -2.669957561410	  -1.896560301237
42    1    0   	  -4.040190737630	  -3.345184338296	  -0.516732481797
43    6    0   	  -1.939710923236	   1.497627388858	   1.296953474269
44    1    0   	  -2.601092128205	   2.305425199337	   1.609176758922
45    1    0   	  -1.969672401458	   0.660434453229	   2.000066149808
46    1    0   	  -0.881843886983	   1.847657732666	   1.311413736367
47    6    0   	   1.046002821302	   3.663356685524	  -0.462471203828
48    1    0   	   1.899607129613	   4.092990822636	  -0.998998953095
49    1    0   	   0.213075058178	   3.586294258505	  -1.164274447451
50    1    0   	   0.776094665550	   4.384879701700	   0.316056854524
51    6    0   	   1.754322293777	  -1.944477080144	   2.663662074856
52    1    0   	   1.150810789339	  -2.579927257679	   3.320659263094
53    1    0   	   2.769153175865	  -2.339172912590	   2.664294958318
54    1    0   	   1.775679340858	  -0.947230885287	   3.122802140607
55    6    0   	   3.264730605262	  -2.518798192471	   0.009230843806
56    6    0   	   3.943684893919	  -1.737832822693	  -1.122289719848
57    6    0   	   4.030439729258	  -0.229972611528	  -0.977848291134
58    1    0   	   3.331141965397	  -3.585634816886	  -0.236692137233
59    1    0   	   3.816891711172	  -2.386115391030	   0.942512447404
60    1    0   	   4.957480380385	  -2.130726510300	  -1.273852296919
61    1    0   	   3.412658287633	  -1.954191241367	  -2.060652980894
62    1    0   	   3.659396564026	  -0.212290052032	   1.074418678909
63    6    0   	   4.336904644968	   0.462611293472	  -2.280294563336
64    1    0   	   5.223600634414	   0.016275684349	  -2.743568179902
65    1    0   	   3.512377367844	   0.323194253066	  -2.989764112466
66    1    0   	   4.519701211527	   1.531480409866	  -2.175980016519
---------------------------------------------------------------------
SCF Done:  E(scf) =  -976.592215573881     A.U.


IRC-IRC-IRC-IRC-IRC-IRC-IRC-IRC-IRC-IRC-IRC-IRC-IRC-IRC-IRC-IRC-IRC-IRC
Pt  53  Step number   1 out of a maximum of  2639
NET REACTION COORDINATE UP TO THIS POINT =    53.00000
IRC-IRC-IRC-IRC-IRC-IRC-IRC-IRC-IRC-IRC-IRC-IRC-IRC-IRC-IRC-IRC-IRC-IRC
                         Input orientation:
---------------------------------------------------------------------
Center     Atomic      Atomic             Coordinates (Angstroms)
Number     Number       Type             X           Y           Z
---------------------------------------------------------------------
1     6    0   	  -0.293751208522	  -1.383867442127	   1.335734947723
2     6    0   	   1.144276182195	  -1.874125859244	   1.286776476372
3     6    0   	   2.604505100250	   2.387750329749	   1.120793443068
4     6    0   	   1.817911995005	  -2.133957963617	   0.162303194484
5     6    0   	   3.913907056042	   1.871425386215	   0.468157052104
6     6    0   	   3.873104549301	   0.393567874298	   0.192557446238
7     1    0   	   2.384201400458	   1.761433351626	   1.993719557462
8     1    0   	   4.731345115371	   2.087935876532	   1.165979196043
9     1    0   	   2.763277785174	   3.406620156060	   1.486636916100
10    1    0   	   4.115734416770	   2.448065057507	  -0.438397435622
11    1    0   	   1.298524065991	  -2.035057774428	  -0.793020085035
12    6    0   	   0.903956270881	   1.155953288902	  -0.140491690778
13    1    0   	  -0.254032451718	  -0.404507969808	   1.828062456745
14    6    0   	   1.435477643076	   2.355866843157	   0.160320086949
15    1    0   	   1.337114817876	   0.295786256242	   0.355178020475
16    6    0   	  -1.405991416626	   0.005017071417	  -0.702082275395
17    6    0   	  -1.119177869680	  -1.320385813344	   0.035677024475
18    6    0   	  -0.087404256727	   0.827544030239	  -1.192667706371
19    6    0   	  -2.163290475891	   1.075037178537	  -0.082698025900
20    1    0   	  -2.109529320751	  -1.742563125694	   0.231082997840
21    1    0   	  -0.677484653007	  -1.985065939294	  -0.712575224353
22    1    0   	  -1.906214188955	  -0.252714594498	  -1.640711491276
23    1    0   	  -0.396921164024	   1.688529671547	  -1.790330337294
24    1    0   	   0.348932777226	   0.095500729479	  -1.883557352158
25    6    0   	  -4.544687981502	   1.184659226594	  -0.545593872290
26    6    0   	  -4.667751889052	  -0.243642918311	  -0.990666383477
27    6    0   	  -3.139231889717	   1.818903488350	  -0.892087787573
28    1    0   	  -5.269917712064	   1.809774767966	  -1.075109421297
29    1    0   	  -4.740878980480	   1.308246610084	   0.521762787177
30    1    0   	  -4.732382712227	  -0.386226889705	  -2.069185695639
31    1    0   	  -3.162735461367	   2.877777545280	  -0.620497166242
32    1    0   	  -2.959835460064	   1.699099664280	  -1.963752796324
33    6    0   	  -4.722818062441	  -1.330856251244	  -0.210074577909
34    1    0   	  -0.832054319217	  -2.027619306290	   2.042967774336
35    6    0   	  -4.663588606616	  -1.314152743132	   1.295255310504
36    1    0   	  -3.903524616177	  -2.017703351965	   1.654930913905
37    1    0   	  -4.449075790172	  -0.331772681168	   1.720568528482
38    1    0   	  -5.617385437517	  -1.655599921321	   1.711299067357
39    6    0   	  -4.875198995125	  -2.702645649278	  -0.810479088320
40    1    0   	  -5.781261401403	  -3.186638003511	  -0.431234539780
41    1    0   	  -4.934123143689	  -2.668448785089	  -1.899631445877
42    1    0   	  -4.034181741183	  -3.345787030594	  -0.525878947759
43    6    0   	  -1.938101732122	   1.502267172468	   1.296623968885
44    1    0   	  -2.598596932460	   2.310269763951	   1.610174391982
45    1    0   	  -1.967183036352	   0.665152008402	   1.999911943638
46    1    0   	  -0.880067968313	   1.851484387661	   1.309221962566
47    6    0   	   1.037861373740	   3.667843065460	  -0.451880146649
48    1    0   	   1.888471579624	   4.104253130952	  -0.987681036706
49    1    0   	   0.202900805533	   3.593889898638	  -1.151621597739
50    1    0   	   0.768379982528	   4.382391686534	   0.333212038198
51    6    0   	   1.749839634860	  -1.944754150031	   2.665094540653
52    1    0   	   1.144471856885	  -2.581184763589	   3.319433941276
53    1    0   	   2.764574275216	  -2.339690734673	   2.667737806521
54    1    0   	   1.770221146450	  -0.948301895179	   3.125934240893
55    6    0   	   3.265579756425	  -2.521746705440	   0.014408676077
56    6    0   	   3.948023284440	  -1.744261172265	  -1.117424316182
57    6    0   	   4.034499519094	  -0.236014042252	  -0.976880799310
58    1    0   	   3.330553994729	  -3.589216433483	  -0.229109823935
59    1    0   	   3.816180465330	  -2.388019238672	   0.948478999107
60    1    0   	   4.962126883168	  -2.137845914141	  -1.265014373880
61    1    0   	   3.419538440428	  -1.963071102003	  -2.056641028326
62    1    0   	   3.657185521632	  -0.213229085476	   1.074124866195
63    6    0   	   4.345173242987	   0.453202911072	  -2.280083009253
64    1    0   	   5.233860789778	   0.006190809560	  -2.738862320236
65    1    0   	   3.523369272386	   0.311327163580	  -2.992183132553
66    1    0   	   4.526968746795	   1.522451174661	  -2.177895343935
---------------------------------------------------------------------
SCF Done:  E(scf) =  -976.592141933632     A.U.


IRC-IRC-IRC-IRC-IRC-IRC-IRC-IRC-IRC-IRC-IRC-IRC-IRC-IRC-IRC-IRC-IRC-IRC
Pt  54  Step number   1 out of a maximum of  2639
NET REACTION COORDINATE UP TO THIS POINT =    54.00000
IRC-IRC-IRC-IRC-IRC-IRC-IRC-IRC-IRC-IRC-IRC-IRC-IRC-IRC-IRC-IRC-IRC-IRC
                         Input orientation:
---------------------------------------------------------------------
Center     Atomic      Atomic             Coordinates (Angstroms)
Number     Number       Type             X           Y           Z
---------------------------------------------------------------------
1     6    0   	  -0.292660784309	  -1.375869295129	   1.331986717406
2     6    0   	   1.143536167261	  -1.871981882452	   1.286664799186
3     6    0   	   2.604183639337	   2.385121567819	   1.117914402112
4     6    0   	   1.819273591969	  -2.133748760236	   0.163898879877
5     6    0   	   3.912771230092	   1.868913497275	   0.463828570792
6     6    0   	   3.873203372931	   0.390420856702	   0.191428982459
7     1    0   	   2.384138226913	   1.757804191607	   1.990235001148
8     1    0   	   4.731253181312	   2.087651555454	   1.159764038829
9     1    0   	   2.764014430079	   3.403253702919	   1.485319869171
10    1    0   	   4.112283436178	   2.443939744311	  -0.444278800056
11    1    0   	   1.302833323330	  -2.033027597167	  -0.792822056761
12    6    0   	   0.903780753260	   1.157736005988	  -0.149374960220
13    1    0   	  -0.248446203570	  -0.394125461736	   1.819040494798
14    6    0   	   1.433350561955	   2.356579663649	   0.159247085799
15    1    0   	   1.340328519334	   0.294514677571	   0.338005940575
16    6    0   	  -1.408801599088	   0.010529867419	  -0.704706819546
17    6    0   	  -1.116233113825	  -1.314950173596	   0.030468947560
18    6    0   	  -0.092651566650	   0.835647313668	  -1.198616691907
19    6    0   	  -2.165477239750	   1.079207600942	  -0.082417625518
20    1    0   	  -2.104567651465	  -1.743027634062	   0.223094363622
21    1    0   	  -0.669721373228	  -1.975275652077	  -0.718723617361
22    1    0   	  -1.911494215592	  -0.247286684915	  -1.641976396441
23    1    0   	  -0.404938499737	   1.699850858679	  -1.790158402421
24    1    0   	   0.339402084411	   0.106988894743	  -1.895668349798
25    6    0   	  -4.548426131831	   1.182930310385	  -0.538874423314
26    6    0   	  -4.670020901311	  -0.244272482989	  -0.987732964853
27    6    0   	  -3.145520313914	   1.821335494738	  -0.888422512862
28    1    0   	  -5.276758742725	   1.808010111306	  -1.064156382924
29    1    0   	  -4.741347167973	   1.303067353188	   0.529480592953
30    1    0   	  -4.738516093967	  -0.383789841183	  -2.066411471538
31    1    0   	  -3.171129179482	   2.879868515930	  -0.615780362178
32    1    0   	  -2.968845138604	   1.703000253221	  -1.960707223980
33    6    0   	  -4.719835311492	  -1.333891627367	  -0.210151729947
34    1    0   	  -0.834282463679	  -2.013409947908	   2.042290928184
35    6    0   	  -4.654854417859	  -1.321333708636	   1.294982911503
36    1    0   	  -3.893640174532	  -2.026060979069	   1.649838074637
37    1    0   	  -4.438390140055	  -0.340141611952	   1.722079569783
38    1    0   	  -5.607169011781	  -1.663570842969	   1.713782459633
39    6    0   	  -4.871858215119	  -2.704224629675	  -0.813942908852
40    1    0   	  -5.775153136490	  -3.191344611522	  -0.432105725513
41    1    0   	  -4.935715128520	  -2.666929388637	  -1.902712868726
42    1    0   	  -4.028170780163	  -3.346350395966	  -0.535002464183
43    6    0   	  -1.936571275855	   1.506764154022	   1.296343506685
44    1    0   	  -2.596241072436	   2.314908440516	   1.611249019088
45    1    0   	  -1.964744453090	   0.669677789465	   1.999746900720
46    1    0   	  -0.878407571598	   1.855252861279	   1.307136732076
47    6    0   	   1.029766004519	   3.672239210122	  -0.441169111072
48    1    0   	   1.877293336356	   4.115259021361	  -0.976423512133
49    1    0   	   0.192584947201	   3.601452864271	  -1.138603940176
50    1    0   	   0.761045023901	   4.379845029844	   0.350455769835
51    6    0   	   1.745468525537	  -1.944516905680	   2.666460281027
52    1    0   	   1.138235559562	  -2.581674712159	   3.318365775178
53    1    0   	   2.760077356074	  -2.339758656163	   2.671206814795
54    1    0   	   1.764945861268	  -0.948710914979	   3.128673310258
55    6    0   	   3.266455306517	  -2.524806627047	   0.019627738258
56    6    0   	   3.952306292105	  -1.750747561362	  -1.112518448739
57    6    0   	   4.038432868314	  -0.242119706876	  -0.975863775230
58    1    0   	   3.330084612346	  -3.592897339491	  -0.221481529323
59    1    0   	   3.815483769290	  -2.389969302302	   0.954478060038
60    1    0   	   4.966729040562	  -2.144948226724	  -1.256167043277
61    1    0   	   3.426349648787	  -1.972036144220	  -2.052562012367
62    1    0   	   3.655080515307	  -0.214255526338	   1.073898955183
63    6    0   	   4.353061292531	   0.443767697679	  -2.279842883175
64    1    0   	   5.243571711815	  -0.003955727693	  -2.734367103114
65    1    0   	   3.533792997795	   0.299521452078	  -2.994351400080
66    1    0   	   4.533966905192	   1.513371943997	  -2.179788015368
---------------------------------------------------------------------
SCF Done:  E(scf) =  -976.592068247787     A.U.


IRC-IRC-IRC-IRC-IRC-IRC-IRC-IRC-IRC-IRC-IRC-IRC-IRC-IRC-IRC-IRC-IRC-IRC
Pt  55  Step number   1 out of a maximum of  2639
NET REACTION COORDINATE UP TO THIS POINT =    55.00000
IRC-IRC-IRC-IRC-IRC-IRC-IRC-IRC-IRC-IRC-IRC-IRC-IRC-IRC-IRC-IRC-IRC-IRC
                         Input orientation:
---------------------------------------------------------------------
Center     Atomic      Atomic             Coordinates (Angstroms)
Number     Number       Type             X           Y           Z
---------------------------------------------------------------------
1     6    0   	  -0.291488130392	  -1.367738008728	   1.328091358200
2     6    0   	   1.142838200863	  -1.869720855431	   1.286497081866
3     6    0   	   2.603873549974	   2.382465794253	   1.115004818711
4     6    0   	   1.820650224204	  -2.133701129737	   0.165499541878
5     6    0   	   3.911608192187	   1.866287561970	   0.459468585096
6     6    0   	   3.873275340892	   0.387154173150	   0.190334268093
7     1    0   	   2.384064710277	   1.754202379547	   1.986753620922
8     1    0   	   4.731148576109	   2.087265626455	   1.153482127265
9     1    0   	   2.764836002808	   3.399859758554	   1.483930661784
10    1    0   	   4.108799230119	   2.439648801415	  -0.450212895583
11    1    0   	   1.307154037135	  -2.031429780783	  -0.792632963558
12    6    0   	   0.903569412163	   1.159629731518	  -0.158346031703
13    1    0   	  -0.242709500262	  -0.383619002279	   1.809767748175
14    6    0   	   1.431197790735	   2.357310337201	   0.158202892441
15    1    0   	   1.343519457429	   0.293382580258	   0.320602444473
16    6    0   	  -1.411616905964	   0.016113221827	  -0.707384775222
17    6    0   	  -1.113153637444	  -1.309442654414	   0.025096146625
18    6    0   	  -0.097946723078	   0.843907437102	  -1.204583599070
19    6    0   	  -2.167701032682	   1.083364571517	  -0.082107096413
20    1    0   	  -2.099361425401	  -1.743605879110	   0.214849356113
21    1    0   	  -0.661689596128	  -1.965216753089	  -0.725068237036
22    1    0   	  -1.916772647475	  -0.241756913411	  -1.643297598024
23    1    0   	  -0.412998437115	   1.711329646216	  -1.789899301455
24    1    0   	   0.329825013712	   0.118716422576	  -1.907783016521
25    6    0   	  -4.552177432184	   1.181172836468	  -0.532082596273
26    6    0   	  -4.672283623385	  -0.244904809473	  -0.984774295841
27    6    0   	  -3.151857703917	   1.823778813787	  -0.884650786346
28    1    0   	  -5.283614165117	   1.806198021595	  -1.053096260940
29    1    0   	  -4.741808915510	   1.297828665047	   0.537253752998
30    1    0   	  -4.744683577478	  -0.381328958975	  -2.063589411449
31    1    0   	  -3.179576450719	   2.881944887092	  -0.610875921656
32    1    0   	  -2.977919410135	   1.706983904752	  -1.957555884504
33    6    0   	  -4.716772661948	  -1.336939541425	  -0.210268501804
34    1    0   	  -0.836457845285	  -1.998941722502	   2.041475669026
35    6    0   	  -4.645975647690	  -1.328569435042	   1.294633132811
36    1    0   	  -3.883514167369	  -2.034363886394	   1.644603318674
37    1    0   	  -4.427680279340	  -0.348555342888	   1.723531502731
38    1    0   	  -5.596729940526	  -1.671757212938	   1.716208920271
39    6    0   	  -4.868422770497	  -2.705789261307	  -0.817487994319
40    1    0   	  -5.768933548121	  -3.196060379211	  -0.433114257210
41    1    0   	  -4.937197128770	  -2.665376114356	  -1.905843463294
42    1    0   	  -4.022092915067	  -3.346874847656	  -0.544217521142
43    6    0   	  -1.935113348262	   1.511160566815	   1.296121549787
44    1    0   	  -2.594024041242	   2.319369614306	   1.612433786707
45    1    0   	  -1.962311772037	   0.674051585386	   1.999578955103
46    1    0   	  -0.876862299752	   1.859024486423	   1.305136729110
47    6    0   	   1.021636935567	   3.676588470876	  -0.430248687791
48    1    0   	   1.865967100915	   4.126128674069	  -0.965111427870
49    1    0   	   0.182044385487	   3.609031955324	  -1.125123108605
50    1    0   	   0.753993907203	   4.377213910061	   0.367929824490
51    6    0   	   1.741146828195	  -1.943811623983	   2.667772497742
52    1    0   	   1.132013634706	  -2.581462159522	   3.317426040592
53    1    0   	   2.755596165987	  -2.339431766095	   2.674728673616
54    1    0   	   1.759789971126	  -0.948521005595	   3.131072071817
55    6    0   	   3.267342369020	  -2.527995365007	   0.024926291491
56    6    0   	   3.956592368347	  -1.757365391701	  -1.107519495816
57    6    0   	   4.042295754337	  -0.248360276390	  -0.974787047235
58    1    0   	   3.329659612867	  -3.596702387144	  -0.213747861682
59    1    0   	   3.814766759751	  -2.391999396686	   0.960562615395
60    1    0   	   4.971347350619	  -2.152118982672	  -1.247189759152
61    1    0   	   3.433198207533	  -1.981185253267	  -2.048381961321
62    1    0   	   3.653027727363	  -0.215377934209	   1.073730060645
63    6    0   	   4.360697859934	   0.434194047272	  -2.279568932456
64    1    0   	   5.252864355336	  -0.014322531441	  -2.730036772944
65    1    0   	   3.543792845136	   0.287687128217	  -2.996294151594
66    1    0   	   4.540864428430	   1.504125772418	  -2.181664939040
---------------------------------------------------------------------
SCF Done:  E(scf) =  -976.591993894411     A.U.


IRC-IRC-IRC-IRC-IRC-IRC-IRC-IRC-IRC-IRC-IRC-IRC-IRC-IRC-IRC-IRC-IRC-IRC
Pt  56  Step number   1 out of a maximum of  2639
NET REACTION COORDINATE UP TO THIS POINT =    56.00000
IRC-IRC-IRC-IRC-IRC-IRC-IRC-IRC-IRC-IRC-IRC-IRC-IRC-IRC-IRC-IRC-IRC-IRC
                         Input orientation:
---------------------------------------------------------------------
Center     Atomic      Atomic             Coordinates (Angstroms)
Number     Number       Type             X           Y           Z
---------------------------------------------------------------------
1     6    0   	  -0.290238857704	  -1.359631816310	   1.324113636471
2     6    0   	   1.142207584485	  -1.867411192726	   1.286283637827
3     6    0   	   2.603571900025	   2.379828296364	   1.112109473014
4     6    0   	   1.822033125448	  -2.133875869195	   0.167092931167
5     6    0   	   3.910432674814	   1.863599251487	   0.455150382483
6     6    0   	   3.873303933176	   0.383832225844	   0.189286187594
7     1    0   	   2.383970217252	   1.750682649138	   1.983324336336
8     1    0   	   4.731026099456	   2.086786665171	   1.147243091764
9     1    0   	   2.765713862485	   3.396494528605	   1.482495008654
10    1    0   	   4.105338858747	   2.435276249529	  -0.456096432214
11    1    0   	   1.311424413829	  -2.030435357732	  -0.792445433235
12    6    0   	   0.903298169160	   1.161616070487	  -0.167252797958
13    1    0   	  -0.236886188813	  -0.373179717559	   1.800384236655
14    6    0   	   1.429056311559	   2.358051912347	   0.157192078055
15    1    0   	   1.346584054328	   0.292409434709	   0.303270759947
16    6    0   	  -1.414405477740	   0.021664460497	  -0.710058077277
17    6    0   	  -1.109973053860	  -1.303967798883	   0.019644972684
18    6    0   	  -0.103252852193	   0.852234789799	  -1.210467678587
19    6    0   	  -2.169935148354	   1.087425455636	  -0.081754125449
20    1    0   	  -2.093973908026	  -1.744313971830	   0.206475064261
21    1    0   	  -0.653502251686	  -1.955052070374	  -0.731517464525
22    1    0   	  -1.921982947439	  -0.236228816628	  -1.644635870043
23    1    0   	  -0.421062312571	   1.722855143521	  -1.789521117473
24    1    0   	   0.320300178356	   0.130575945633	  -1.919781416391
25    6    0   	  -4.555885787959	   1.179421906412	  -0.525341458888
26    6    0   	  -4.674508463482	  -0.245524394933	  -0.981847547798
27    6    0   	  -3.158138292468	   1.826187725333	  -0.880826164833
28    1    0   	  -5.290369045064	   1.804375854054	  -1.042133061224
29    1    0   	  -4.742278904851	   1.292624518501	   0.544940525202
30    1    0   	  -4.750784484108	  -0.378883046730	  -2.060774125258
31    1    0   	  -3.187927347705	   2.883966975401	  -0.605856692084
32    1    0   	  -2.986896352434	   1.710979891233	  -1.954340017983
33    6    0   	  -4.713692931107	  -1.339940649659	  -0.210427346334
34    1    0   	  -0.838541436603	  -1.984462969106	   2.040539924422
35    6    0   	  -4.637121190331	  -1.335723109501	   1.294207531249
36    1    0   	  -3.873349569125	  -2.042467379378	   1.639317033301
37    1    0   	  -4.417131338998	  -0.356859228658	   1.724894985468
38    1    0   	  -5.586270821767	  -1.679989124313	   1.718527616070
39    6    0   	  -4.864964097661	  -2.707307245388	  -0.821053614810
40    1    0   	  -5.762726411497	  -3.200694046883	  -0.434243337408
41    1    0   	  -4.938551980022	  -2.663813206453	  -1.908971894075
42    1    0   	  -4.016066793386	  -3.347349431005	  -0.553359944195
43    6    0   	  -1.933758272359	   1.515370350091	   1.295979407526
44    1    0   	  -2.591997695957	   2.323556314879	   1.613732982047
45    1    0   	  -1.959910384384	   0.678186009007	   1.999426370004
46    1    0   	  -0.875470250655	   1.862744567481	   1.303263382540
47    6    0   	   1.013649950511	   3.680825042825	  -0.419340237880
48    1    0   	   1.854750902373	   4.136687951744	  -0.953929330210
49    1    0   	   0.171535679458	   3.616506880062	  -1.111487450234
50    1    0   	   0.747345868731	   4.374553523335	   0.385288776179
51    6    0   	   1.736965150388	  -1.942655203784	   2.669018253720
52    1    0   	   1.125935131125	  -2.580561779880	   3.316643113988
53    1    0   	   2.751227103791	  -2.338710656294	   2.678252781013
54    1    0   	   1.754850079938	  -0.947738016121	   3.133097438284
55    6    0   	   3.268253583988	  -2.531264750771	   0.030226441611
56    6    0   	   3.960798201375	  -1.763993114270	  -1.102516818077
57    6    0   	   4.046022393545	  -0.254621006676	  -0.973672676294
58    1    0   	   3.329352807403	  -3.600572190398	  -0.206021558178
59    1    0   	   3.814074418717	  -2.394051410959	   0.966634160398
60    1    0   	   4.975889462266	  -2.159224156975	  -1.238269417875
61    1    0   	   3.439933820334	  -1.990351784646	  -2.044163023446
62    1    0   	   3.651019434078	  -0.216566959645	   1.073610370995
63    6    0   	   4.368009120060	   0.424651612030	  -2.279260296507
64    1    0   	   5.261660387459	  -0.024730071630	  -2.725898125368
65    1    0   	   3.553288369023	   0.276037333892	  -2.998016128448
66    1    0   	   4.547599696689	   1.494876083609	  -2.183478160630
---------------------------------------------------------------------
SCF Done:  E(scf) =  -976.591920082847     A.U.


IRC-IRC-IRC-IRC-IRC-IRC-IRC-IRC-IRC-IRC-IRC-IRC-IRC-IRC-IRC-IRC-IRC-IRC
Pt  57  Step number   1 out of a maximum of  2639
NET REACTION COORDINATE UP TO THIS POINT =    57.00000
IRC-IRC-IRC-IRC-IRC-IRC-IRC-IRC-IRC-IRC-IRC-IRC-IRC-IRC-IRC-IRC-IRC-IRC
                         Input orientation:
---------------------------------------------------------------------
Center     Atomic      Atomic             Coordinates (Angstroms)
Number     Number       Type             X           Y           Z
---------------------------------------------------------------------
1     6    0   	  -0.288917423898	  -1.351573633820	   1.320071881319
2     6    0   	   1.141638668958	  -1.865087202497	   1.286037282552
3     6    0   	   2.603279587574	   2.377221617920	   1.109213339255
4     6    0   	   1.823419006450	  -2.134322297354	   0.168699693394
5     6    0   	   3.909250483415	   1.860870800875	   0.450865295516
6     6    0   	   3.873280818781	   0.380478726619	   0.188273203207
7     1    0   	   2.383864673628	   1.747264504121	   1.979939464807
8     1    0   	   4.730888601386	   2.086233865426	   1.141044118808
9     1    0   	   2.766632681440	   3.393178156394	   1.480985157284
10    1    0   	   4.101912484027	   2.430847604361	  -0.461936201493
11    1    0   	   1.315639716104	  -2.030216362536	  -0.792244023299
12    6    0   	   0.902955680656	   1.163682200808	  -0.176101874436
13    1    0   	  -0.230959649924	  -0.362826753629	   1.790903345177
14    6    0   	   1.426929681794	   2.358790469600	   0.156197279725
15    1    0   	   1.349488884555	   0.291564440814	   0.285988912553
16    6    0   	  -1.417178531438	   0.027167540641	  -0.712707606844
17    6    0   	  -1.106692562749	  -1.298534666698	   0.014133458857
18    6    0   	  -0.108634718301	   0.860700623030	  -1.216238587589
19    6    0   	  -2.172176890892	   1.091387493815	  -0.081353247915
20    1    0   	  -2.088403764932	  -1.745155307713	   0.197982800122
21    1    0   	  -0.645165691067	  -1.944784084210	  -0.738053332695
22    1    0   	  -1.927138444223	  -0.230726813249	  -1.645968066771
23    1    0   	  -0.429251367658	   1.734570837752	  -1.788816673705
24    1    0   	   0.310664099537	   0.142827302910	  -1.931827545213
25    6    0   	  -4.559542638454	   1.177679843898	  -0.518656199876
26    6    0   	  -4.676687528150	  -0.246130663811	  -0.978956509843
27    6    0   	  -3.164353524718	   1.828557637666	  -0.876957950364
28    1    0   	  -5.297018100156	   1.802545743826	  -1.031273390300
29    1    0   	  -4.742752387806	   1.287457529706	   0.552537849125
30    1    0   	  -4.756803759009	  -0.376451297686	  -2.057972026455
31    1    0   	  -3.196166586382	   2.885935289697	  -0.600748977724
32    1    0   	  -2.995762872299	   1.714969086930	  -1.951067588321
33    6    0   	  -4.710600502261	  -1.342894903059	  -0.210630171779
34    1    0   	  -0.840545708028	  -1.969988235447	   2.039503847101
35    6    0   	  -4.628307382407	  -1.342794172806	   1.293707473468
36    1    0   	  -3.863195124198	  -2.050404062528	   1.633989391653
37    1    0   	  -4.406719287022	  -0.365060441889	   1.726171836319
38    1    0   	  -5.575827755531	  -1.688221125922	   1.720732728574
39    6    0   	  -4.861491041410	  -2.708778216653	  -0.824642925899
40    1    0   	  -5.756537530682	  -3.205246638584	  -0.435486676947
41    1    0   	  -4.939798850227	  -2.662237354368	  -1.912102723491
42    1    0   	  -4.010096261705	  -3.347775476269	  -0.562442052174
43    6    0   	  -1.932492832406	   1.519409513532	   1.295916654504
44    1    0   	  -2.590142733905	   2.327493265410	   1.615137134132
45    1    0   	  -1.957534121525	   0.682104215559	   1.999297041903
46    1    0   	  -0.874216770802	   1.866422586602	   1.301514321076
47    6    0   	   1.005822446444	   3.684937968545	  -0.408485393477
48    1    0   	   1.843691833661	   4.146933652239	  -0.942878615811
49    1    0   	   0.161117971439	   3.623871427143	  -1.097783299687
50    1    0   	   0.741070007556	   4.371855275596	   0.402478369053
51    6    0   	   1.732920150236	  -1.941104354816	   2.670210180879
52    1    0   	   1.120006938789	  -2.579074325151	   3.315999752958
53    1    0   	   2.746973999871	  -2.337632769734	   2.681778115060
54    1    0   	   1.750101598961	  -0.946438933347	   3.134806830667
55    6    0   	   3.269202510964	  -2.534605689097	   0.035540357021
56    6    0   	   3.964903222989	  -1.770608828514	  -1.097520181293
57    6    0   	   4.049619791959	  -0.260881050192	  -0.972529730833
58    1    0   	   3.329215408520	  -3.604497948491	  -0.198285226661
59    1    0   	   3.813430432358	  -2.396090218174	   0.972694438044
60    1    0   	   4.980329388050	  -2.166252742733	  -1.229450537035
61    1    0   	   3.446506723110	  -1.999503424474	  -2.039903691527
62    1    0   	   3.649009954034	  -0.217795745755	   1.073521972290
63    6    0   	   4.375071050043	   0.415155817463	  -2.278915161784
64    1    0   	   5.270060900027	  -0.035169357106	  -2.721899965121
65    1    0   	   3.562395464410	   0.264591987521	  -2.999564395108
66    1    0   	   4.554249696647	   1.485637866537	  -2.185216610916
---------------------------------------------------------------------
SCF Done:  E(scf) =  -976.591846797862     A.U.


IRC-IRC-IRC-IRC-IRC-IRC-IRC-IRC-IRC-IRC-IRC-IRC-IRC-IRC-IRC-IRC-IRC-IRC
Pt  58  Step number   1 out of a maximum of  2639
NET REACTION COORDINATE UP TO THIS POINT =    58.00000
IRC-IRC-IRC-IRC-IRC-IRC-IRC-IRC-IRC-IRC-IRC-IRC-IRC-IRC-IRC-IRC-IRC-IRC
                         Input orientation:
---------------------------------------------------------------------
Center     Atomic      Atomic             Coordinates (Angstroms)
Number     Number       Type             X           Y           Z
---------------------------------------------------------------------
1     6    0   	  -0.287544793553	  -1.343500789360	   1.315972543290
2     6    0   	   1.141092177059	  -1.862726379254	   1.285758417286
3     6    0   	   2.603001509087	   2.374659309597	   1.106286831770
4     6    0   	   1.824780191660	  -2.134938890036	   0.170311037753
5     6    0   	   3.908055144674	   1.858104551546	   0.446566792578
6     6    0   	   3.873202106183	   0.377091384936	   0.187270844860
7     1    0   	   2.383769010947	   1.743973295163	   1.976582699650
8     1    0   	   4.730741453049	   2.085623995468	   1.134819690388
9     1    0   	   2.767607169635	   3.389928242742	   1.479356363588
10    1    0   	   4.098494516720	   2.426350407478	  -0.467791699008
11    1    0   	   1.319795025454	  -2.030532403901	  -0.792039342975
12    6    0   	   0.902557537680	   1.165822162411	  -0.184908191133
13    1    0   	  -0.224919197173	  -0.352493377839	   1.781309677568
14    6    0   	   1.424802323437	   2.359530017060	   0.155212315086
15    1    0   	   1.352274589107	   0.290855313289	   0.268743822513
16    6    0   	  -1.419945768313	   0.032657341992	  -0.715338923939
17    6    0   	  -1.103347421073	  -1.293099259375	   0.008578056476
18    6    0   	  -0.114055972952	   0.869248914149	  -1.221914448436
19    6    0   	  -2.174424971412	   1.095295234119	  -0.080907907416
20    1    0   	  -2.082688614484	  -1.746064397730	   0.189410885691
21    1    0   	  -0.636734357561	  -1.934392340076	  -0.744649708247
22    1    0   	  -1.932260273434	  -0.225219616940	  -1.647292894789
23    1    0   	  -0.437472896996	   1.746370339913	  -1.787898271324
24    1    0   	   0.300971598644	   0.155315512230	  -1.943819462014
25    6    0   	  -4.563157325807	   1.175928661586	  -0.511964306433
26    6    0   	  -4.678829795679	  -0.246729045200	  -0.976073121597
27    6    0   	  -3.170533948391	   1.830909332992	  -0.873025946354
28    1    0   	  -5.303598771676	   1.800693527135	  -1.020409024355
29    1    0   	  -4.743197606266	   1.282279498171	   0.560118340498
30    1    0   	  -4.762784551937	  -0.374009460125	  -2.055155772042
31    1    0   	  -3.204349354988	   2.887868574112	  -0.595530009413
32    1    0   	  -3.004580303926	   1.718975174788	  -1.947723048798
33    6    0   	  -4.707469624900	  -1.345829569835	  -0.210879090231
34    1    0   	  -0.842494085847	  -1.955427158274	   2.038390258293
35    6    0   	  -4.619465098597	  -1.349851746792	   1.293128240166
36    1    0   	  -3.853008186867	  -2.058288728160	   1.628576504253
37    1    0   	  -4.396312610096	  -0.373249995101	   1.727374973844
38    1    0   	  -5.565336307245	  -1.696485793977	   1.722838126470
39    6    0   	  -4.857979131893	  -2.710213547465	  -0.828291871704
40    1    0   	  -5.750321170599	  -3.209756019635	  -0.436859531925
41    1    0   	  -4.940953454618	  -2.660629962300	  -1.915269746522
42    1    0   	  -4.004133582519	  -3.348157570107	  -0.571547755832
43    6    0   	  -1.931292909765	   1.523331265398	   1.295923479864
44    1    0   	  -2.588420533274	   2.331243757169	   1.616640123356
45    1    0   	  -1.955163776960	   0.685863415591	   1.999185759684
46    1    0   	  -0.873071240210	   1.870091618752	   1.299871042116
47    6    0   	   0.998068999772	   3.688930068456	  -0.397644620898
48    1    0   	   1.832680242275	   4.156950519652	  -0.931891407346
49    1    0   	   0.150719324649	   3.631095126601	  -1.083982945473
50    1    0   	   0.735021489059	   4.369075302746	   0.419563043354
51    6    0   	   1.728947524639	  -1.939249544336	   2.671353527149
52    1    0   	   1.114150532268	  -2.577134605867	   3.315444340834
53    1    0   	   2.742770756790	  -2.336291379063	   2.685299106084
54    1    0   	   1.745476763646	  -0.944747455211	   3.136277557850
55    6    0   	   3.270142108569	  -2.537998433913	   0.040871559520
56    6    0   	   3.968929892348	  -1.777237475738	  -1.092511156255
57    6    0   	   4.053134760184	  -0.267165488800	  -0.971362945551
58    1    0   	   3.329141229911	  -3.608465200624	  -0.190527985002
59    1    0   	   3.812779233982	  -2.398126344623	   0.978756197970
60    1    0   	   4.984685812964	  -2.173258576058	  -1.220661890252
61    1    0   	   3.452974808778	  -2.008669970868	  -2.035603865760
62    1    0   	   3.646951526823	  -0.219050359759	   1.073440184260
63    6    0   	   4.382009904661	   0.405649827892	  -2.278533944938
64    1    0   	   5.278216197544	  -0.045715057972	  -2.717978869402
65    1    0   	   3.571281853156	   0.253282469952	  -3.000986399548
66    1    0   	   4.560943376690	   1.476355040725	  -2.186893126305
---------------------------------------------------------------------
SCF Done:  E(scf) =  -976.591773861539     A.U.


IRC-IRC-IRC-IRC-IRC-IRC-IRC-IRC-IRC-IRC-IRC-IRC-IRC-IRC-IRC-IRC-IRC-IRC
Pt  59  Step number   1 out of a maximum of  2639
NET REACTION COORDINATE UP TO THIS POINT =    59.00000
IRC-IRC-IRC-IRC-IRC-IRC-IRC-IRC-IRC-IRC-IRC-IRC-IRC-IRC-IRC-IRC-IRC-IRC
                         Input orientation:
---------------------------------------------------------------------
Center     Atomic      Atomic             Coordinates (Angstroms)
Number     Number       Type             X           Y           Z
---------------------------------------------------------------------
1     6    0   	  -0.286143375500	  -1.335357284885	   1.311814975409
2     6    0   	   1.140538565080	  -1.860287451117	   1.285445970407
3     6    0   	   2.602742402955	   2.372140544472	   1.103300359275
4     6    0   	   1.826097060197	  -2.135609607533	   0.171913824618
5     6    0   	   3.906841558423	   1.855285568271	   0.442217136349
6     6    0   	   3.873066510812	   0.373651046459	   0.186260603783
7     1    0   	   2.383694737869	   1.740818456599	   1.973234419255
8     1    0   	   4.730586793178	   2.084951165049	   1.128522240715
9     1    0   	   2.768655188872	   3.386745778869	   1.477570670076
10    1    0   	   4.095071974285	   2.421759301487	  -0.473709623774
11    1    0   	   1.323891277811	  -2.031072152769	  -0.791844105512
12    6    0   	   0.902125845944	   1.168029721458	  -0.193708976600
13    1    0   	  -0.218794570403	  -0.342132420770	   1.771612811807
14    6    0   	   1.422660902290	   2.360274209981	   0.154226476010
15    1    0   	   1.355011261130	   0.290282799454	   0.251464554810
16    6    0   	  -1.422724029153	   0.038174034049	  -0.717959536878
17    6    0   	  -1.099960068536	  -1.287616975869	   0.002979134583
18    6    0   	  -0.119482471702	   0.877822727715	  -1.227531900460
19    6    0   	  -2.176687836935	   1.099192835682	  -0.080415645687
20    1    0   	  -2.076839819765	  -1.747011644508	   0.180756164425
21    1    0   	  -0.628221007342	  -1.923825122593	  -0.751302094537
22    1    0   	  -1.937380900990	  -0.219668408937	  -1.648610367875
23    1    0   	  -0.445640379164	   1.758143890621	  -1.786916789804
24    1    0   	   0.291289303221	   0.167844852293	  -1.955653059507
25    6    0   	  -4.566755113085	   1.174152758174	  -0.505207592224
26    6    0   	  -4.680955231189	  -0.247324216419	  -0.973172693555
27    6    0   	  -3.176722035780	   1.833265578055	  -0.869002108216
28    1    0   	  -5.310159028561	   1.798808081632	  -1.009445296890
29    1    0   	  -4.743608433452	   1.277046585836	   0.567749005359
30    1    0   	  -4.768784108557	  -0.371533255799	  -2.052301910573
31    1    0   	  -3.212542488596	   2.889787348164	  -0.590165854751
32    1    0   	  -3.013414246042	   1.723028332633	  -1.944283627543
33    6    0   	  -4.704275282509	  -1.348771482402	  -0.211177076113
34    1    0   	  -0.844407756758	  -1.940727289120	   2.037194490347
35    6    0   	  -4.610521430109	  -1.356959076641	   1.292465938157
36    1    0   	  -3.842722166544	  -2.066210213231	   1.623037587432
37    1    0   	  -4.385803789340	  -0.381504423513	   1.728514334243
38    1    0   	  -5.554720779654	  -1.704830998613	   1.724861365299
39    6    0   	  -4.854401739118	  -2.711626438421	  -0.832033866078
40    1    0   	  -5.744007567326	  -3.214275768135	  -0.438352834869
41    1    0   	  -4.942061557356	  -2.658974235259	  -1.918497942215
42    1    0   	  -3.998115826003	  -3.348487775553	  -0.580785963557
43    6    0   	  -1.930142508232	   1.527180699243	   1.295998923184
44    1    0   	  -2.586793613409	   2.334868324975	   1.618246007593
45    1    0   	  -1.952806357677	   0.689507634160	   1.999091026730
46    1    0   	  -0.872005622832	   1.873759250933	   1.298332882124
47    6    0   	   0.990295822201	   3.692816693366	  -0.386746960657
48    1    0   	   1.821588828220	   4.166851516085	  -0.920864739468
49    1    0   	   0.140249641305	   3.638175567299	  -1.070019501826
50    1    0   	   0.729060616255	   4.366151245215	   0.436664399087
51    6    0   	   1.724999417392	  -1.937128217351	   2.672451485067
52    1    0   	   1.108300365719	  -2.574787817618	   3.314956157682
53    1    0   	   2.738563026741	  -2.334741149329	   2.688814517134
54    1    0   	   1.740945242399	  -0.942715219078	   3.137543512527
55    6    0   	   3.271027539613	  -2.541432735434	   0.046221477209
56    6    0   	   3.972914334044	  -1.783920078492	  -1.087467763465
57    6    0   	   4.056620150549	  -0.273515052652	  -0.970171823511
58    1    0   	   3.329010442705	  -3.612469366811	  -0.182743999199
59    1    0   	   3.812065278761	  -2.400190023560	   0.984833475243
60    1    0   	   4.988992175581	  -2.180310089761	  -1.211821866790
61    1    0   	   3.459414749793	  -2.017896967486	  -2.031263681068
62    1    0   	   3.644803235574	  -0.220334194113	   1.073346734600
63    6    0   	   4.388941542758	   0.396066384062	  -2.278113613659
64    1    0   	   5.286275921731	  -0.056430175077	  -2.714071867349
65    1    0   	   3.580103988611	   0.242011385173	  -3.002322192513
66    1    0   	   4.567770502576	   1.466966576449	  -2.188518237840
---------------------------------------------------------------------
SCF Done:  E(scf) =  -976.591701018446     A.U.


IRC-IRC-IRC-IRC-IRC-IRC-IRC-IRC-IRC-IRC-IRC-IRC-IRC-IRC-IRC-IRC-IRC-IRC
Pt  60  Step number   1 out of a maximum of  2639
NET REACTION COORDINATE UP TO THIS POINT =    60.00000
IRC-IRC-IRC-IRC-IRC-IRC-IRC-IRC-IRC-IRC-IRC-IRC-IRC-IRC-IRC-IRC-IRC-IRC
                         Input orientation:
---------------------------------------------------------------------
Center     Atomic      Atomic             Coordinates (Angstroms)
Number     Number       Type             X           Y           Z
---------------------------------------------------------------------
1     6    0   	  -0.284806544664	  -1.327619438172	   1.307848475368
2     6    0   	   1.140020164175	  -1.857881157429	   1.285117543149
3     6    0   	   2.602502645062	   2.369782700019	   1.100438510307
4     6    0   	   1.827305839508	  -2.136233522455	   0.173405244225
5     6    0   	   3.905669000708	   1.852561822005	   0.438067244375
6     6    0   	   3.872888331786	   0.370339849088	   0.185294607964
7     1    0   	   2.383628376268	   1.737923745342	   1.970077219128
8     1    0   	   4.730424126211	   2.084245636854	   1.122512910399
9     1    0   	   2.769705140144	   3.383773371594	   1.475778078124
10    1    0   	   4.091822565948	   2.417329038461	  -0.479349371950
11    1    0   	   1.327709734763	  -2.031620228887	  -0.791677216318
12    6    0   	   0.901682095059	   1.170170130718	  -0.202002188393
13    1    0   	  -0.213035275844	  -0.332367920365	   1.762469267689
14    6    0   	   1.420613208833	   2.360989167171	   0.153303791306
15    1    0   	   1.357540311669	   0.289860897821	   0.235181687283
16    6    0   	  -1.425358788403	   0.043426354794	  -0.720425827490
17    6    0   	  -1.096750918076	  -1.282386049257	  -0.002330928868
18    6    0   	  -0.124587046247	   0.885893880822	  -1.232808127922
19    6    0   	  -2.178845135055	   1.102878494301	  -0.079899245990
20    1    0   	  -2.071258607905	  -1.747873845768	   0.172561286397
21    1    0   	  -0.620181354538	  -1.913736431260	  -0.757617458390
22    1    0   	  -1.942230461498	  -0.214367967095	  -1.649843522516
23    1    0   	  -0.453247394138	   1.769148375785	  -1.786080360728
24    1    0   	   0.282232584599	   0.179549956637	  -1.966608227001
25    6    0   	  -4.570153723940	   1.172453387593	  -0.498763403796
26    6    0   	  -4.682954504689	  -0.247881454650	  -0.970423149042
27    6    0   	  -3.182585903386	   1.835509804973	  -0.865102371141
28    1    0   	  -5.316350874216	   1.797000759898	  -0.999000897930
29    1    0   	  -4.743992866114	   1.272047950646	   0.575006758875
30    1    0   	  -4.774476772571	  -0.369157568669	  -2.049580481634
31    1    0   	  -3.220318075062	   2.891596670303	  -0.584936733287
32    1    0   	  -3.021785749653	   1.726930108043	  -1.940935159829
33    6    0   	  -4.701201842602	  -1.351558703086	  -0.211507102750
34    1    0   	  -0.846167292513	  -1.926839387016	   2.035957729808
35    6    0   	  -4.601968501805	  -1.363723771613	   1.291763733075
36    1    0   	  -3.832900653782	  -2.073738036057	   1.617680953400
37    1    0   	  -4.375760024235	  -0.389369565983	   1.729532528548
38    1    0   	  -5.544564067638	  -1.712791536093	   1.726709038661
39    6    0   	  -4.850963392765	  -2.712943029530	  -0.835657617035
40    1    0   	  -5.737987101076	  -3.218536915172	  -0.439906389555
41    1    0   	  -4.943018751178	  -2.657371675667	  -1.921618316042
42    1    0   	  -3.992398491240	  -3.348775170457	  -0.589595276602
43    6    0   	  -1.929106587389	   1.530751239176	   1.296144727654
44    1    0   	  -2.585334451881	   2.338187913294	   1.619873800495
45    1    0   	  -1.950612351564	   0.692843505918	   1.999025448725
46    1    0   	  -0.871067681908	   1.877199210107	   1.296988385391
47    6    0   	   0.982921096279	   3.696411788372	  -0.376420387121
48    1    0   	   1.811040484561	   4.176123112764	  -0.910419985493
49    1    0   	   0.130307990499	   3.644727539601	  -1.056740320285
50    1    0   	   0.723439363640	   4.363308165264	   0.452797003847
51    6    0   	   1.721306397198	  -1.934867435709	   2.673444778690
52    1    0   	   1.102781032228	  -2.572164582602	   3.314564138721
53    1    0   	   2.734590726775	  -2.333093004918	   2.692126698531
54    1    0   	   1.736788889379	  -0.940466036804	   3.138540635987
55    6    0   	   3.271805828675	  -2.544710319240	   0.051272126554
56    6    0   	   3.976657908258	  -1.790292770203	  -1.082683381285
57    6    0   	   4.059905063228	  -0.279582073747	  -0.969031520272
58    1    0   	   3.328786642728	  -3.616283299377	  -0.175390076885
59    1    0   	   3.811325748769	  -2.402187920759	   0.990573273456
60    1    0   	   4.993031813780	  -2.187034546717	  -1.203418241202
61    1    0   	   3.465502333716	  -2.026677564531	  -2.027145325185
62    1    0   	   3.642686735681	  -0.221592491920	   1.073239154018
63    6    0   	   4.395531147076	   0.386930013502	  -2.277682865667
64    1    0   	   5.293894267910	  -0.066689329647	  -2.710345572496
65    1    0   	   3.588469151922	   0.231335692000	  -3.003546136873
66    1    0   	   4.574337588002	   1.457998127346	  -2.190015204867
---------------------------------------------------------------------
SCF Done:  E(scf) =  -976.591632250765     A.U.


IRC-IRC-IRC-IRC-IRC-IRC-IRC-IRC-IRC-IRC-IRC-IRC-IRC-IRC-IRC-IRC-IRC-IRC
Pt  61  Step number   1 out of a maximum of  2639
NET REACTION COORDINATE UP TO THIS POINT =    61.00000
IRC-IRC-IRC-IRC-IRC-IRC-IRC-IRC-IRC-IRC-IRC-IRC-IRC-IRC-IRC-IRC-IRC-IRC
                         Input orientation:
---------------------------------------------------------------------
Center     Atomic      Atomic             Coordinates (Angstroms)
Number     Number       Type             X           Y           Z
---------------------------------------------------------------------
1     6    0   	  -0.283143748547	  -1.318370125431	   1.303086709724
2     6    0   	   1.139436376494	  -1.854876421941	   1.284702134578
3     6    0   	   2.602222632256	   2.367000272733	   1.096930434955
4     6    0   	   1.828695844259	  -2.136959817208	   0.175172383051
5     6    0   	   3.904269141584	   1.849219303002	   0.433117679792
6     6    0   	   3.872617431484	   0.366317240635	   0.184134030672
7     1    0   	   2.383524118897	   1.734637441264	   1.966310421291
8     1    0   	   4.730180906791	   2.083243109282	   1.115398197007
9     1    0   	   2.771011522782	   3.380294990099	   1.473407369639
10    1    0   	   4.088067030099	   2.411936997194	  -0.486035416769
11    1    0   	   1.332169926423	  -2.032319137408	  -0.791458640703
12    6    0   	   0.901116637941	   1.172815354479	  -0.211944726510
13    1    0   	  -0.206173399112	  -0.320866309030	   1.751655657756
14    6    0   	   1.418160708952	   2.361797533771	   0.152164882221
15    1    0   	   1.360515250544	   0.289601272380	   0.215601374251
16    6    0   	  -1.428522844275	   0.049666840713	  -0.723293029217
17    6    0   	  -1.092837565447	  -1.276102111060	  -0.008660380666
18    6    0   	  -0.130705281271	   0.895512791579	  -1.238996537855
19    6    0   	  -2.181434087947	   1.107214615887	  -0.079208325121
20    1    0   	  -2.064341137044	  -1.748971019137	   0.162734020653
21    1    0   	  -0.610485264405	  -1.901431338082	  -0.765163075097
22    1    0   	  -1.948010597638	  -0.208089009734	  -1.651230376003
23    1    0   	  -0.462263703861	   1.782161916628	  -1.784974581992
24    1    0   	   0.271331362989	   0.193482238579	  -1.979397227052
25    6    0   	  -4.574162701565	   1.170390345169	  -0.491080182102
26    6    0   	  -4.685329280029	  -0.248550956837	  -0.967150350023
27    6    0   	  -3.189543263738	   1.838132942604	  -0.860355718922
28    1    0   	  -5.323630261265	   1.794781712270	  -0.986558103772
29    1    0   	  -4.744432839382	   1.266062821797	   0.583610014687
30    1    0   	  -4.781283915451	  -0.366343087956	  -2.046287540178
31    1    0   	  -3.229534262722	   2.893677321606	  -0.578558632702
32    1    0   	  -3.031712184864	   1.731554475920	  -1.936824456754
33    6    0   	  -4.697509393445	  -1.354846329047	  -0.211969153593
34    1    0   	  -0.848134324436	  -1.910321051602	   2.034282860907
35    6    0   	  -4.591731015311	  -1.371730232926	   1.290784858242
36    1    0   	  -3.821167872169	  -2.082596718392	   1.611141878224
37    1    0   	  -4.363759722943	  -0.398688002598	   1.730578091915
38    1    0   	  -5.532379959962	  -1.722263081347	   1.728756826119
39    6    0   	  -4.846835791354	  -2.714458163741	  -0.840039198859
40    1    0   	  -5.730718835309	  -3.223600968675	  -0.441850051322
41    1    0   	  -4.944158984595	  -2.655434268134	  -1.925337685802
42    1    0   	  -3.985578414619	  -3.348981807024	  -0.600187610119
43    6    0   	  -1.927953223919	   1.534878890236	   1.296418921885
44    1    0   	  -2.583705610349	   2.341978556406	   1.621932114531
45    1    0   	  -1.948109622567	   0.696634323339	   1.998975608328
46    1    0   	  -0.870057434660	   1.881207693542	   1.295582078790
47    6    0   	   0.974145941784	   3.700424895359	  -0.364027888776
48    1    0   	   1.798432260600	   4.186916691813	  -0.897763337551
49    1    0   	   0.118486398263	   3.652183649557	  -1.040757451829
50    1    0   	   0.716832225183	   4.359538246774	   0.471994993760
51    6    0   	   1.717010005970	  -1.931810092849	   2.674569827517
52    1    0   	   1.096276914938	  -2.568447972104	   3.314214009560
53    1    0   	   2.729900051675	  -2.330885589636	   2.696037946858
54    1    0   	   1.732099020306	  -0.937316655480	   3.139443590237
55    6    0   	   3.272641355341	  -2.548619753518	   0.057256245182
56    6    0   	   3.981020039423	  -1.797899008308	  -1.076987799180
57    6    0   	   4.063776752675	  -0.286852435498	  -0.967650903899
58    1    0   	   3.328373181792	  -3.620814043000	  -0.166688211798
59    1    0   	   3.810380040999	  -2.404603601774	   0.997356699223
60    1    0   	   4.997711951891	  -2.195061255686	  -1.193437017530
61    1    0   	   3.472631973877	  -2.037129078743	  -2.022208039151
62    1    0   	   3.640045894702	  -0.223169842159	   1.073058820875
63    6    0   	   4.403396231038	   0.376026338750	  -2.277083377816
64    1    0   	   5.303012469131	  -0.078865810089	  -2.705755109134
65    1    0   	   3.598514940383	   0.218562907190	  -3.004950414768
66    1    0   	   4.582129886299	   1.447292887996	  -2.191695465100
---------------------------------------------------------------------
SCF Done:  E(scf) =  -976.591550537346     A.U.


IRC-IRC-IRC-IRC-IRC-IRC-IRC-IRC-IRC-IRC-IRC-IRC-IRC-IRC-IRC-IRC-IRC-IRC
Pt  62  Step number   1 out of a maximum of  2639
NET REACTION COORDINATE UP TO THIS POINT =    62.00000
IRC-IRC-IRC-IRC-IRC-IRC-IRC-IRC-IRC-IRC-IRC-IRC-IRC-IRC-IRC-IRC-IRC-IRC
                         Input orientation:
---------------------------------------------------------------------
Center     Atomic      Atomic             Coordinates (Angstroms)
Number     Number       Type             X           Y           Z
---------------------------------------------------------------------
1     6    0   	  -0.281642147085	  -1.310132497012	   1.298861884582
2     6    0   	   1.138961720094	  -1.852125475125	   1.284346042219
3     6    0   	   2.601990385627	   2.364490954588	   1.093787162531
4     6    0   	   1.829908804770	  -2.137690241054	   0.176761770684
5     6    0   	   3.903045900435	   1.846171709416	   0.428752830897
6     6    0   	   3.872342016324	   0.362671683134	   0.183118524914
7     1    0   	   2.383417484798	   1.731719684424	   1.962958583519
8     1    0   	   4.729966761183	   2.082233590350	   1.109150472547
9     1    0   	   2.772198095817	   3.377176746022	   1.471247824706
10    1    0   	   4.084813919652	   2.407075530928	  -0.491926164373
11    1    0   	   1.336057430609	  -2.033155441547	  -0.791230900481
12    6    0   	   0.900612065659	   1.175160028248	  -0.220854527144
13    1    0   	  -0.200106072358	  -0.310647445543	   1.742078452365
14    6    0   	   1.416006041275	   2.362487735732	   0.151117160175
15    1    0   	   1.363182805555	   0.289331164318	   0.198026116726
16    6    0   	  -1.431376377813	   0.055203092708	  -0.725797049798
17    6    0   	  -1.089308310813	  -1.270518511538	  -0.014291814801
18    6    0   	  -0.136230290577	   0.904132354336	  -1.244492379483
19    6    0   	  -2.183769832270	   1.111032653517	  -0.078523265849
20    1    0   	  -2.058098784249	  -1.750055831619	   0.153941337910
21    1    0   	  -0.601744114745	  -1.890413988766	  -0.771892634961
22    1    0   	  -1.953199607689	  -0.202510211901	  -1.652415475363
23    1    0   	  -0.470427400966	   1.793844547998	  -1.783863975255
24    1    0   	   0.261481516904	   0.205995695011	  -1.990853186609
25    6    0   	  -4.577748001249	   1.168561762252	  -0.484272834783
26    6    0   	  -4.687442349887	  -0.249132996888	  -0.964295553160
27    6    0   	  -3.195732305752	   1.840469266922	  -0.856076059859
28    1    0   	  -5.330106382278	   1.792827315740	  -0.975536672385
29    1    0   	  -4.744888441309	   1.260721219457	   0.591233186066
30    1    0   	  -4.787341815870	  -0.363808115684	  -2.043418869045
31    1    0   	  -3.237722195162	   2.895522976264	  -0.572796328593
32    1    0   	  -3.040491714532	   1.735707657813	  -1.933109018644
33    6    0   	  -4.694197274173	  -1.357766029080	  -0.212446002826
34    1    0   	  -0.849848712285	  -1.895652516404	   2.032780485396
35    6    0   	  -4.582603583680	  -1.378846537156	   1.289851503120
36    1    0   	  -3.810728787532	  -2.090490428845	   1.605269684662
37    1    0   	  -4.353048943237	  -0.406974837243	   1.731447111492
38    1    0   	  -5.521535660026	  -1.730654055394	   1.730510724595
39    6    0   	  -4.843128893359	  -2.715801509328	  -0.844002211891
40    1    0   	  -5.724195659841	  -3.228117446143	  -0.443612316684
41    1    0   	  -4.945181931439	  -2.653701622618	  -1.928707802410
42    1    0   	  -3.979456665821	  -3.349149676709	  -0.609707387097
43    6    0   	  -1.926993929518	   1.538458698776	   1.296761827989
44    1    0   	  -2.582339347144	   2.345240455311	   1.623874792961
45    1    0   	  -1.945976486602	   0.699884491240	   1.998992029515
46    1    0   	  -0.869233034008	   1.884693443472	   1.294477989915
47    6    0   	   0.966353922796	   3.703998164569	  -0.352947852607
48    1    0   	   1.787207976546	   4.196575742291	  -0.886435454352
49    1    0   	   0.107965576735	   3.658872349655	  -1.026460176266
50    1    0   	   0.710998824619	   4.356109702164	   0.489203039067
51    6    0   	   1.713341159254	  -1.928729653700	   2.675553087539
52    1    0   	   1.090631962352	  -2.564543413415	   3.314099392211
53    1    0   	   2.725836526984	  -2.328665561989	   2.699518749118
54    1    0   	   1.728235785121	  -0.934041484554	   3.139969962929
55    6    0   	   3.273365598652	  -2.552155002573	   0.062564177692
56    6    0   	   3.984825543924	  -1.804706264223	  -1.071962451427
57    6    0   	   4.067181279831	  -0.293366947504	  -0.966419769541
58    1    0   	   3.327998701236	  -3.624901918554	  -0.158963743224
59    1    0   	   3.809547340851	  -2.406792018364	   1.003356235713
60    1    0   	   5.001790236573	  -2.202254925199	  -1.184675726241
61    1    0   	   3.478837346850	  -2.046427317448	  -2.017836965543
62    1    0   	   3.637625545413	  -0.224642393681	   1.072904268968
63    6    0   	   4.410386773659	   0.366315482082	  -2.276521332799
64    1    0   	   5.311184764147	  -0.089623947180	  -2.701591597933
65    1    0   	   3.607502110117	   0.207134683713	  -3.006219949420
66    1    0   	   4.588955021392	   1.437774110356	  -2.193142708107
---------------------------------------------------------------------
SCF Done:  E(scf) =  -976.591477636570     A.U.


IRC-IRC-IRC-IRC-IRC-IRC-IRC-IRC-IRC-IRC-IRC-IRC-IRC-IRC-IRC-IRC-IRC-IRC
Pt  63  Step number   1 out of a maximum of  2639
NET REACTION COORDINATE UP TO THIS POINT =    63.00000
IRC-IRC-IRC-IRC-IRC-IRC-IRC-IRC-IRC-IRC-IRC-IRC-IRC-IRC-IRC-IRC-IRC-IRC
                         Input orientation:
---------------------------------------------------------------------
Center     Atomic      Atomic             Coordinates (Angstroms)
Number     Number       Type             X           Y           Z
---------------------------------------------------------------------
1     6    0   	  -0.280061409452	  -1.301862140429	   1.294596378897
2     6    0   	   1.138538242872	  -1.849287441527	   1.283956406357
3     6    0   	   2.601740565073	   2.361980526190	   1.090637679904
4     6    0   	   1.831088990938	  -2.138542990072	   0.178341526907
5     6    0   	   3.901788625529	   1.843034812149	   0.424416648172
6     6    0   	   3.871972254539	   0.358956924808	   0.182092174301
7     1    0   	   2.383263164213	   1.728863061291	   1.959639166634
8     1    0   	   4.729697769403	   2.081058566255	   1.102959400176
9     1    0   	   2.773415004657	   3.374068386870	   1.469017358002
10    1    0   	   4.081611728521	   2.402130432786	  -0.497749369138
11    1    0   	   1.339850266080	  -2.034374759069	  -0.790989677981
12    6    0   	   0.900014193029	   1.177602362384	  -0.229719503623
13    1    0   	  -0.193968943761	  -0.300478236491	   1.732502396370
14    6    0   	   1.413839287836	   2.363164218747	   0.150087361101
15    1    0   	   1.365673136734	   0.289246294967	   0.180481924871
16    6    0   	  -1.434257809838	   0.060747205921	  -0.728239046907
17    6    0   	  -1.085711240662	  -1.264886760986	  -0.019930052418
18    6    0   	  -0.141836771984	   0.912848341692	  -1.249866011875
19    6    0   	  -2.186141223843	   1.114810153109	  -0.077751983923
20    1    0   	  -2.051676880993	  -1.751142177307	   0.145131635812
21    1    0   	  -0.592957601519	  -1.879202971051	  -0.778653992032
22    1    0   	  -1.958398713653	  -0.196924432573	  -1.653534024279
23    1    0   	  -0.478641467846	   1.805601330620	  -1.782539528702
24    1    0   	   0.251468386055	   0.218704280336	  -2.002187665637
25    6    0   	  -4.581306589659	   1.166685279973	  -0.477477832744
26    6    0   	  -4.689503068552	  -0.249740670239	  -0.961466544534
27    6    0   	  -3.201911617996	   1.842783263371	  -0.851689249683
28    1    0   	  -5.336513252175	   1.790784593037	  -0.964556171954
29    1    0   	  -4.745377781376	   1.255329295789	   0.598801692893
30    1    0   	  -4.793322768171	  -0.361313338473	  -2.040539712140
31    1    0   	  -3.245909643646	   2.897318718474	  -0.566858614761
32    1    0   	  -3.049227859443	   1.739893694082	  -1.929270676696
33    6    0   	  -4.690841718626	  -1.360678968364	  -0.212992988205
34    1    0   	  -0.851447420434	  -1.880961720822	   2.031156038519
35    6    0   	  -4.573446534381	  -1.385937176597	   1.288795434792
36    1    0   	  -3.800272286657	  -2.098314086706	   1.599273095761
37    1    0   	  -4.342314961110	  -0.415237055647	   1.732172808132
38    1    0   	  -5.510635911032	  -1.739052995152	   1.732127202453
39    6    0   	  -4.839371892206	  -2.717122830430	  -0.848032730165
40    1    0   	  -5.717718761614	  -3.232539748477	  -0.445647769919
41    1    0   	  -4.945928499264	  -2.651987502835	  -1.932124270019
42    1    0   	  -3.973421444172	  -3.349318439338	  -0.619107297727
43    6    0   	  -1.926124530680	   1.541927353809	   1.297214009149
44    1    0   	  -2.581117405020	   2.348328376144	   1.625961845402
45    1    0   	  -1.943888798928	   0.702975076143	   1.999057922389
46    1    0   	  -0.868535967833	   1.888159928304	   1.293526541598
47    6    0   	   0.958738585018	   3.707379112994	  -0.341952010612
48    1    0   	   1.776237375245	   4.205871393469	  -0.875094726111
49    1    0   	   0.097698974664	   3.665308828961	  -1.012281522814
50    1    0   	   0.705375577789	   4.352588236740	   0.506099324172
51    6    0   	   1.709809839865	  -1.925257833325	   2.676473686703
52    1    0   	   1.085036181298	  -2.559916080321	   3.314162682019
53    1    0   	   2.721817772436	  -2.326266721680	   2.702977534045
54    1    0   	   1.724759829584	  -0.930225429314	   3.140128388838
55    6    0   	   3.274047974913	  -2.555740712145	   0.067839218714
56    6    0   	   3.988519673121	  -1.811523592157	  -1.066962663462
57    6    0   	   4.070490769935	  -0.299909121392	  -0.965186396700
58    1    0   	   3.327606805074	  -3.629022151092	  -0.151297781852
59    1    0   	   3.808696113733	  -2.409022163219	   1.009300155634
60    1    0   	   5.005737380998	  -2.209432264121	  -1.175997300139
61    1    0   	   3.484888498422	  -2.055727389932	  -2.013448616947
62    1    0   	   3.635071508209	  -0.226203884779	   1.072696000446
63    6    0   	   4.417356613798	   0.356593291170	  -2.275901016026
64    1    0   	   5.319484573002	  -0.100223135163	  -2.697190832178
65    1    0   	   3.616638886258	   0.195494314602	  -3.007549898915
66    1    0   	   4.595545126475	   1.428275288411	  -2.194546035469
---------------------------------------------------------------------
SCF Done:  E(scf) =  -976.591404919112     A.U.


IRC-IRC-IRC-IRC-IRC-IRC-IRC-IRC-IRC-IRC-IRC-IRC-IRC-IRC-IRC-IRC-IRC-IRC
Pt  64  Step number   1 out of a maximum of  2639
NET REACTION COORDINATE UP TO THIS POINT =    64.00000
IRC-IRC-IRC-IRC-IRC-IRC-IRC-IRC-IRC-IRC-IRC-IRC-IRC-IRC-IRC-IRC-IRC-IRC
                         Input orientation:
---------------------------------------------------------------------
Center     Atomic      Atomic             Coordinates (Angstroms)
Number     Number       Type             X           Y           Z
---------------------------------------------------------------------
1     6    0   	  -0.278396117739	  -1.293551338412	   1.290330679793
2     6    0   	   1.138160307101	  -1.846422981036	   1.283565644284
3     6    0   	   2.601503543223	   2.359479704285	   1.087504383527
4     6    0   	   1.832224664863	  -2.139545157342	   0.179929444733
5     6    0   	   3.900546287552	   1.839852700953	   0.420152182226
6     6    0   	   3.871553484732	   0.355216472516	   0.181082599256
7     1    0   	   2.383100959864	   1.726078303799	   1.956377539863
8     1    0   	   4.729414826378	   2.079763911455	   1.096889131297
9     1    0   	   2.774654072059	   3.370990382336	   1.466735503031
10    1    0   	   4.078514556234	   2.397162642689	  -0.503458615786
11    1    0   	   1.343513046152	  -2.036002299248	  -0.790709581668
12    6    0   	   0.899387994398	   1.180071624396	  -0.238526642501
13    1    0   	  -0.187645854508	  -0.290266990075	   1.722809457851
14    6    0   	   1.411699397818	   2.363798894815	   0.149078351630
15    1    0   	   1.368098018640	   0.289247269280	   0.162954038184
16    6    0   	  -1.437133918945	   0.066224742834	  -0.730623548291
17    6    0   	  -1.082056605172	  -1.259275641948	  -0.025533191425
18    6    0   	  -0.147474164965	   0.921597466006	  -1.255112236911
19    6    0   	  -2.188509360582	   1.118503012144	  -0.076939533946
20    1    0   	  -2.045117575434	  -1.752281519610	   0.136371518024
21    1    0   	  -0.584130000857	  -1.867929921444	  -0.785381380087
22    1    0   	  -1.963551085302	  -0.191408794914	  -1.654607367349
23    1    0   	  -0.486881362554	   1.817392100743	  -1.780972882989
24    1    0   	   0.241354603135	   0.231557762269	  -2.013430837107
25    6    0   	  -4.584804764918	   1.164793449639	  -0.470778863187
26    6    0   	  -4.691508876762	  -0.250361346700	  -0.958703393646
27    6    0   	  -3.208012789560	   1.845045803455	  -0.847293638006
28    1    0   	  -5.342807448565	   1.788706731018	  -0.953725659545
29    1    0   	  -4.745870365346	   1.249948548078	   0.606242378297
30    1    0   	  -4.799208364871	  -0.358871286354	  -2.037702884433
31    1    0   	  -3.253992626549	   2.899052119708	  -0.560890153323
32    1    0   	  -3.057829428825	   1.744041297109	  -1.925407159949
33    6    0   	  -4.687478434181	  -1.363558479093	  -0.213597967670
34    1    0   	  -0.852950202887	  -1.866109975887	   2.029563938802
35    6    0   	  -4.564339553572	  -1.392929705659	   1.287652918368
36    1    0   	  -3.789910960785	  -2.106029414348	   1.593240110418
37    1    0   	  -4.331616009727	  -0.423392625896	   1.732769425441
38    1    0   	  -5.499799220533	  -1.747320796515	   1.733629344910
39    6    0   	  -4.835613454454	  -2.718420948118	  -0.852073638958
40    1    0   	  -5.711273774234	  -3.236895675571	  -0.447760991594
41    1    0   	  -4.946589951321	  -2.650304641520	  -1.935536012536
42    1    0   	  -3.967445939425	  -3.349460207202	  -0.628427063974
43    6    0   	  -1.925324699938	   1.545270899600	   1.297730147983
44    1    0   	  -2.580030656494	   2.351231456967	   1.628121019523
45    1    0   	  -1.941822802678	   0.705912206247	   1.999151103760
46    1    0   	  -0.867946877647	   1.891605247550	   1.292679520163
47    6    0   	   0.951256079473	   3.710599103894	  -0.330994230921
48    1    0   	   1.765426694348	   4.214907113650	  -0.863755804118
49    1    0   	   0.087586830268	   3.671555975180	  -0.998127229326
50    1    0   	   0.699942521960	   4.348950667190	   0.522836552552
51    6    0   	   1.706436777696	  -1.921478142645	   2.677353834509
52    1    0   	   1.079562106024	  -2.554719890768	   3.314399358980
53    1    0   	   2.717892127334	  -2.323704820329	   2.706407703224
54    1    0   	   1.721636397171	  -0.925982678439	   3.139989038454
55    6    0   	   3.274697336959	  -2.559358049976	   0.073060998707
56    6    0   	   3.992059197356	  -1.818295381215	  -1.062032152460
57    6    0   	   4.073665278927	  -0.306419672867	  -0.963960428956
58    1    0   	   3.327246778796	  -3.633156504399	  -0.143720560364
59    1    0   	   3.807852127541	  -2.411261827892	   1.015159174619
60    1    0   	   5.009514132560	  -2.216538999239	  -1.167506765791
61    1    0   	   3.490697667113	  -2.064943455042	  -2.009081062287
62    1    0   	   3.632487850889	  -0.227822668696	   1.072476813038
63    6    0   	   4.424145049605	   0.346958634313	  -2.275255166194
64    1    0   	   5.327675131003	  -0.110591066707	  -2.692724655842
65    1    0   	   3.625660179323	   0.183823021579	  -3.008877639526
66    1    0   	   4.601800424693	   1.418884909969	  -2.195917377468
---------------------------------------------------------------------
SCF Done:  E(scf) =  -976.591333064743     A.U.


IRC-IRC-IRC-IRC-IRC-IRC-IRC-IRC-IRC-IRC-IRC-IRC-IRC-IRC-IRC-IRC-IRC-IRC
Pt  65  Step number   1 out of a maximum of  2639
NET REACTION COORDINATE UP TO THIS POINT =    65.00000
IRC-IRC-IRC-IRC-IRC-IRC-IRC-IRC-IRC-IRC-IRC-IRC-IRC-IRC-IRC-IRC-IRC-IRC
                         Input orientation:
---------------------------------------------------------------------
Center     Atomic      Atomic             Coordinates (Angstroms)
Number     Number       Type             X           Y           Z
---------------------------------------------------------------------
1     6    0   	  -0.276677495502	  -1.285236085113	   1.286048959090
2     6    0   	   1.137797134795	  -1.843558954902	   1.283164514364
3     6    0   	   2.601302775898	   2.357023277023	   1.084400198585
4     6    0   	   1.833294876062	  -2.140711286897	   0.181520534500
5     6    0   	   3.899328708510	   1.836652302627	   0.415950333077
6     6    0   	   3.871086193896	   0.351474842620	   0.180089737221
7     1    0   	   2.382970260756	   1.723409410393	   1.953197379246
8     1    0   	   4.729143341337	   2.078379613312	   1.090911929836
9     1    0   	   2.775943340800	   3.367983219951	   1.464398446626
10    1    0   	   4.075513702003	   2.392192236693	  -0.509072044023
11    1    0   	   1.347024411207	  -2.038079954501	  -0.790398283855
12    6    0   	   0.898736947438	   1.182568984484	  -0.247202177313
13    1    0   	  -0.181152815589	  -0.280053497531	   1.712970619103
14    6    0   	   1.409602388949	   2.364405914727	   0.148114079819
15    1    0   	   1.370442279039	   0.289344403446	   0.145560321317
16    6    0   	  -1.439984378549	   0.071628538517	  -0.732964371700
17    6    0   	  -1.078366602543	  -1.253703823023	  -0.031118162672
18    6    0   	  -0.153097522113	   0.930356700222	  -1.260193550331
19    6    0   	  -2.190855963116	   1.122109319972	  -0.076104294705
20    1    0   	  -2.038449619475	  -1.753469186246	   0.127636723862
21    1    0   	  -0.575289120730	  -1.856613509243	  -0.792087756267
22    1    0   	  -1.968618057253	  -0.185953861408	  -1.655664968162
23    1    0   	  -0.495075622411	   1.829183889566	  -1.779152435750
24    1    0   	   0.231233774590	   0.244533794145	  -2.024516035191
25    6    0   	  -4.588221333629	   1.162881178887	  -0.464175992134
26    6    0   	  -4.693441000412	  -0.251002535887	  -0.956000190002
27    6    0   	  -3.214018601224	   1.847252793603	  -0.842909801423
28    1    0   	  -5.348976070424	   1.786587090069	  -0.943038302399
29    1    0   	  -4.746331025429	   1.244575994779	   0.613558631025
30    1    0   	  -4.804972090614	  -0.356492839714	  -2.034904277762
31    1    0   	  -3.261953981549	   2.900721079989	  -0.554918247105
32    1    0   	  -3.066286943343	   1.748139012675	  -1.921539976802
33    6    0   	  -4.684101967761	  -1.366410427904	  -0.214250052849
34    1    0   	  -0.854388656720	  -1.851134167257	   2.027973990255
35    6    0   	  -4.555287012315	  -1.399828372451	   1.286437532974
36    1    0   	  -3.779654591114	  -2.113646256049	   1.587189788242
37    1    0   	  -4.320953052852	  -0.431445854531	   1.733249881294
38    1    0   	  -5.489035435604	  -1.755454431057	   1.735026336403
39    6    0   	  -4.831849118048	  -2.719702905986	  -0.856112843117
40    1    0   	  -5.704851677698	  -3.241194897308	  -0.449931871149
41    1    0   	  -4.947170803004	  -2.648659795334	  -1.938931149941
42    1    0   	  -3.961520744156	  -3.349580283760	  -0.637662213171
43    6    0   	  -1.924574867218	   1.548498982469	   1.298287397820
44    1    0   	  -2.579062112512	   2.353958833304	   1.630325191753
45    1    0   	  -1.939744521423	   0.708715412765	   1.999259100580
46    1    0   	  -0.867447475878	   1.895047281456	   1.291902071205
47    6    0   	   0.943932202550	   3.713663929441	  -0.320101388456
48    1    0   	   1.754798256710	   4.223661855246	  -0.852482537707
49    1    0   	   0.077639478625	   3.677606543284	  -0.984004084637
50    1    0   	   0.694745325565	   4.345237300092	   0.539373008598
51    6    0   	   1.703188240219	  -1.917409151311	   2.678186274948
52    1    0   	   1.074174266968	  -2.548971105203	   3.314801515673
53    1    0   	   2.714025810796	  -2.320996485294	   2.709808389653
54    1    0   	   1.718829174801	  -0.921331025678	   3.139541251076
55    6    0   	   3.275302940028	  -2.562994432241	   0.078235123486
56    6    0   	   3.995429069047	  -1.825005156690	  -1.057167640502
57    6    0   	   4.076681530070	  -0.312880480646	  -0.962744621947
58    1    0   	   3.326930022148	  -3.637293707983	  -0.136218591162
59    1    0   	   3.806996190002	  -2.413482937686	   1.020941428277
60    1    0   	   5.013109913843	  -2.223552719473	  -1.159198541569
61    1    0   	   3.496253110124	  -2.074064668214	  -2.004732794833
62    1    0   	   3.629895940495	  -0.229470665079	   1.072255948014
63    6    0   	   4.430690748795	   0.337424476383	  -2.274601335366
64    1    0   	   5.335648926680	  -0.120755755545	  -2.688265723249
65    1    0   	   3.634455720045	   0.172178275249	  -3.010178745644
66    1    0   	   4.607715777669	   1.409606626981	  -2.197277364656
---------------------------------------------------------------------
SCF Done:  E(scf) =  -976.591262595624     A.U.


IRC-IRC-IRC-IRC-IRC-IRC-IRC-IRC-IRC-IRC-IRC-IRC-IRC-IRC-IRC-IRC-IRC-IRC
Pt  66  Step number   1 out of a maximum of  2639
NET REACTION COORDINATE UP TO THIS POINT =    66.00000
IRC-IRC-IRC-IRC-IRC-IRC-IRC-IRC-IRC-IRC-IRC-IRC-IRC-IRC-IRC-IRC-IRC-IRC
                         Input orientation:
---------------------------------------------------------------------
Center     Atomic      Atomic             Coordinates (Angstroms)
Number     Number       Type             X           Y           Z
---------------------------------------------------------------------
1     6    0   	  -0.274969680589	  -1.277011974902	   1.281740174493
2     6    0   	   1.137414028142	  -1.840708686615	   1.282739766299
3     6    0   	   2.601164572702	   2.354653963612	   1.081326852634
4     6    0   	   1.834278911874	  -2.142030390958	   0.183105450264
5     6    0   	   3.898143887364	   1.833458436185	   0.411788685535
6     6    0   	   3.870571274454	   0.347752696717	   0.179109265528
7     1    0   	   2.382912781622	   1.720914072574	   1.950114679459
8     1    0   	   4.728909901960	   2.076937878140	   1.084980833697
9     1    0   	   2.777322713805	   3.365095389697	   1.461986818381
10    1    0   	   4.072594368635	   2.387229970826	  -0.514625717601
11    1    0   	   1.350366836491	  -2.040604570987	  -0.790068861926
12    6    0   	   0.898069988878	   1.185107315068	  -0.255682767325
13    1    0   	  -0.174648352084	  -0.269985401945	   1.703092954520
14    6    0   	   1.407562713838	   2.365013591593	   0.147212389125
15    1    0   	   1.372699805267	   0.289562602652	   0.128417211572
16    6    0   	  -1.442781764538	   0.076968154195	  -0.735278285933
17    6    0   	  -1.074685208691	  -1.248187516711	  -0.036704408740
18    6    0   	  -0.158651958857	   0.939099483824	  -1.265087150800
19    6    0   	  -2.193161867045	   1.125640351572	  -0.075263609794
20    1    0   	  -2.031755898652	  -1.754655927903	   0.118902622350
21    1    0   	  -0.566511167906	  -1.845305567003	  -0.798791778886
22    1    0   	  -1.973560835635	  -0.180532591663	  -1.656736410248
23    1    0   	  -0.503138492021	   1.840927223379	  -1.777114532222
24    1    0   	   0.221223128958	   0.257576412398	  -2.035364191974
25    6    0   	  -4.591540419883	   1.160941056148	  -0.457653903314
26    6    0   	  -4.695285179180	  -0.251671311565	  -0.953343055516
27    6    0   	  -3.219921537441	   1.849406001169	  -0.838549085399
28    1    0   	  -5.355015491493	   1.784417162896	  -0.932463018712
29    1    0   	  -4.746722762327	   1.239200188783	   0.620769995411
30    1    0   	  -4.810598933962	  -0.354182808203	  -2.032131508935
31    1    0   	  -3.269792355029	   2.902328220900	  -0.548958168256
32    1    0   	  -3.074607939285	   1.752183943960	  -1.917682350290
33    6    0   	  -4.680702437576	  -1.369244177171	  -0.214936103899
34    1    0   	  -0.855808506392	  -1.836250989068	   2.026287857377
35    6    0   	  -4.546279047980	  -1.406648023612	   1.285164267279
36    1    0   	  -3.769493427992	  -2.121182491320	   1.581134875390
37    1    0   	  -4.310315182020	  -0.439412975242	   1.733631956504
38    1    0   	  -5.478335270646	  -1.763469161046	   1.736333288551
39    6    0   	  -4.828067755419	  -2.720976803458	  -0.860141445420
40    1    0   	  -5.698440866839	  -3.245448264564	  -0.452149671370
41    1    0   	  -4.947661781225	  -2.647057008562	  -1.942302540753
42    1    0   	  -3.955630793653	  -3.349687279457	  -0.646807189738
43    6    0   	  -1.923850377131	   1.551631034241	   1.298863471719
44    1    0   	  -2.578166755433	   2.356549333851	   1.632544112858
45    1    0   	  -1.937653462442	   0.711413223129	   1.999368875973
46    1    0   	  -0.867000734547	   1.898471446492	   1.291170997303
47    6    0   	   0.936775041241	   3.716595031508	  -0.309291017010
48    1    0   	   1.744347376701	   4.232148628528	  -0.841326191802
49    1    0   	   0.067848434234	   3.683461744403	  -0.969908146925
50    1    0   	   0.689804083194	   4.341491897554	   0.555684891866
51    6    0   	   1.700023078171	  -1.913064475935	   2.678960998794
52    1    0   	   1.068830399723	  -2.542685766026	   3.315353070173
53    1    0   	   2.710178469345	  -2.318149555222	   2.713177552960
54    1    0   	   1.716290317103	  -0.916286700769	   3.138776812541
55    6    0   	   3.275849659928	  -2.566630904203	   0.083371153274
56    6    0   	   3.998629772162	  -1.831646015308	  -1.052357060759
57    6    0   	   4.079533556513	  -0.319283436566	  -0.961539570458
58    1    0   	   3.326646797583	  -3.641418171429	  -0.128767869972
59    1    0   	   3.806100233862	  -2.415655778373	   1.026661793782
60    1    0   	   5.016529118620	  -2.230465361891	  -1.151040530705
61    1    0   	   3.501570968087	  -2.083094120306	  -2.000398258219
62    1    0   	   3.627307583796	  -0.231118276705	   1.072039017940
63    6    0   	   4.436965691524	   0.327985637044	  -2.273954007797
64    1    0   	   5.343321557057	  -0.130784443295	  -2.683882533711
65    1    0   	   3.642944212788	   0.160617114743	  -3.011424702171
66    1    0   	   4.613344199842	   1.400421651197	  -2.198643528764
---------------------------------------------------------------------
SCF Done:  E(scf) =  -976.591193974829     A.U.


IRC-IRC-IRC-IRC-IRC-IRC-IRC-IRC-IRC-IRC-IRC-IRC-IRC-IRC-IRC-IRC-IRC-IRC
Pt  67  Step number   1 out of a maximum of  2639
NET REACTION COORDINATE UP TO THIS POINT =    67.00000
IRC-IRC-IRC-IRC-IRC-IRC-IRC-IRC-IRC-IRC-IRC-IRC-IRC-IRC-IRC-IRC-IRC-IRC
                         Input orientation:
---------------------------------------------------------------------
Center     Atomic      Atomic             Coordinates (Angstroms)
Number     Number       Type             X           Y           Z
---------------------------------------------------------------------
1     6    0   	  -0.273326885194	  -1.268911083721	   1.277364398279
2     6    0   	   1.136982152614	  -1.837841573118	   1.282278014779
3     6    0   	   2.601107585285	   2.352384412945	   1.078246149864
4     6    0   	   1.835172876462	  -2.143480001686	   0.184691313408
5     6    0   	   3.896985029021	   1.830253961263	   0.407603548182
6     6    0   	   3.870006239849	   0.344023800958	   0.178127906175
7     1    0   	   2.382956682872	   1.718621035924	   1.947105060731
8     1    0   	   4.728730229902	   2.075446492559	   1.078996065466
9     1    0   	   2.778841946945	   3.362339356211	   1.459448605444
10    1    0   	   4.069716831544	   2.382226550643	  -0.520208968304
11    1    0   	   1.353565371155	  -2.043541720880	  -0.789728634877
12    6    0   	   0.897390532203	   1.187728552158	  -0.264014491511
13    1    0   	  -0.168301532703	  -0.260148227281	   1.693286024929
14    6    0   	   1.405570148587	   2.365656926577	   0.146370409682
15    1    0   	   1.374893276276	   0.289934727781	   0.111439061957
16    6    0   	  -1.445530990222	   0.082312609803	  -0.737597409788
17    6    0   	  -1.071004481596	  -1.242677696917	  -0.042366501577
18    6    0   	  -0.164144229268	   0.947886857285	  -1.269833309883
19    6    0   	  -2.195437761451	   1.129146086890	  -0.074419335080
20    1    0   	  -2.025020989321	  -1.755821109331	   0.110022582685
21    1    0   	  -0.557740992046	  -1.833900267962	  -0.805574347326
22    1    0   	  -1.978399767540	  -0.175064732551	  -1.657849302689
23    1    0   	  -0.511072970768	   1.852683623836	  -1.774895603146
24    1    0   	   0.211324939251	   0.270740307655	  -2.046006194199
25    6    0   	  -4.594789057009	   1.158947539608	  -0.451133723594
26    6    0   	  -4.697053401677	  -0.252379930873	  -0.950692847829
27    6    0   	  -3.225780691127	   1.851529091556	  -0.834172532670
28    1    0   	  -5.360987001437	   1.782167397694	  -0.921871433533
29    1    0   	  -4.747029789235	   1.233759555158	   0.627964410664
30    1    0   	  -4.816139743854	  -0.351922712127	  -2.029344695250
31    1    0   	  -3.277593370840	   2.903892388199	  -0.542958700975
32    1    0   	  -3.082887132976	   1.756214341450	  -1.913801596008
33    6    0   	  -4.677237924774	  -1.372094689284	  -0.215651509406
34    1    0   	  -0.857273427259	  -1.821623135736	   2.024365796040
35    6    0   	  -4.537212584216	  -1.413465947341	   1.283831783053
36    1    0   	  -3.759302137279	  -2.128712874430	   1.575022707204
37    1    0   	  -4.299595553647	  -0.447380161943	   1.733931762901
38    1    0   	  -5.467572631169	  -1.771468115209	   1.737576946814
39    6    0   	  -4.824219879078	  -2.722261175995	  -0.864191166384
40    1    0   	  -5.691956791210	  -3.249712778625	  -0.454421129339
41    1    0   	  -4.948067395304	  -2.645483415004	  -1.945673769861
42    1    0   	  -3.949698031799	  -3.349781344333	  -0.655956188298
43    6    0   	  -1.923128906140	   1.554718993385	   1.299450069907
44    1    0   	  -2.577289226107	   2.359080462785	   1.634772273921
45    1    0   	  -1.935565791327	   0.714060888954	   1.999476142729
46    1    0   	  -0.866567241577	   1.901874886276	   1.290475867162
47    6    0   	   0.929712109639	   3.719443721201	  -0.298467216962
48    1    0   	   1.733954020107	   4.240475757856	  -0.830211021441
49    1    0   	   0.058102167775	   3.689181341032	  -0.955691292576
50    1    0   	   0.685076343217	   4.337709950043	   0.571920341419
51    6    0   	   1.696878752625	  -1.908418113620	   2.679678313693
52    1    0   	   1.063447530193	  -2.535830379596	   3.316039094870
53    1    0   	   2.706282340089	  -2.315145704639	   2.716542436794
54    1    0   	   1.713956359349	  -0.910825484416	   3.137695243470
55    6    0   	   3.276326824630	  -2.570283878298	   0.088525657907
56    6    0   	   4.001702240607	  -1.838283961357	  -1.047540884086
57    6    0   	   4.082257494849	  -0.325692299730	  -0.960330867922
58    1    0   	   3.326362731754	  -3.645554349487	  -0.121278122822
59    1    0   	   3.805130498356	  -2.417784385640	   1.032387436278
60    1    0   	   5.019816027461	  -2.237349915023	  -1.142917348017
61    1    0   	   3.506729715865	  -2.092127255665	  -1.996030236086
62    1    0   	   3.624703816026	  -0.232761991582	   1.071827729852
63    6    0   	   4.443023538405	   0.318537350864	  -2.273314876598
64    1    0   	   5.350693517181	  -0.140864782648	  -2.679604307016
65    1    0   	   3.651133637521	   0.149099514585	  -3.012586751055
66    1    0   	   4.618834416136	   1.391210535217	  -2.200030188482
---------------------------------------------------------------------
SCF Done:  E(scf) =  -976.591126867770     A.U.


IRC-IRC-IRC-IRC-IRC-IRC-IRC-IRC-IRC-IRC-IRC-IRC-IRC-IRC-IRC-IRC-IRC-IRC
Pt  68  Step number   1 out of a maximum of  2639
NET REACTION COORDINATE UP TO THIS POINT =    68.00000
IRC-IRC-IRC-IRC-IRC-IRC-IRC-IRC-IRC-IRC-IRC-IRC-IRC-IRC-IRC-IRC-IRC-IRC
                         Input orientation:
---------------------------------------------------------------------
Center     Atomic      Atomic             Coordinates (Angstroms)
Number     Number       Type             X           Y           Z
---------------------------------------------------------------------
1     6    0   	  -0.271783479404	  -1.260971770592	   1.272913230847
2     6    0   	   1.136490702590	  -1.834939085787	   1.281773554907
3     6    0   	   2.601139468419	   2.350222863236	   1.075136945168
4     6    0   	   1.835976112841	  -2.145025104201	   0.186277369563
5     6    0   	   3.895846777087	   1.827028761024	   0.403363349611
6     6    0   	   3.869389501113	   0.340274217921	   0.177138131983
7     1    0   	   2.383111052975	   1.716547990879	   1.944154114966
8     1    0   	   4.728609449764	   2.073906979564	   1.072907725208
9     1    0   	   2.780526980416	   3.359722525294	   1.456755514378
10    1    0   	   4.066859921999	   2.377155035379	  -0.525865185254
11    1    0   	   1.356632781563	  -2.046807791543	  -0.789381683978
12    6    0   	   0.896702843754	   1.190461845719	  -0.272222676757
13    1    0   	  -0.162248735362	  -0.250620229889	   1.683673073037
14    6    0   	   1.403620979391	   2.366360175638	   0.145582399201
15    1    0   	   1.377035345535	   0.290492609183	   0.094597255561
16    6    0   	  -1.448228403588	   0.087698052414	  -0.739935104014
17    6    0   	  -1.067329052558	  -1.237151017824	  -0.048131337942
18    6    0   	  -0.169566501825	   0.956732657592	  -1.274460091380
19    6    0   	  -2.197691246908	   1.132648752868	  -0.073570624988
20    1    0   	  -2.018264310729	  -1.756929094193	   0.100944489741
21    1    0   	  -0.548978394527	  -1.822374477286	  -0.812463074293
22    1    0   	  -1.983140123903	  -0.169511804825	  -1.659013466480
23    1    0   	  -0.518865180083	   1.864450451305	  -1.772565665323
24    1    0   	   0.201569258855	   0.283995072695	  -2.056432547618
25    6    0   	  -4.597984562384	   1.156887715591	  -0.444581593452
26    6    0   	  -4.698757983387	  -0.253134381273	  -0.948032160025
27    6    0   	  -3.231625907532	   1.853629534838	  -0.829759459940
28    1    0   	  -5.366919066238	   1.779823406882	  -0.911208828657
29    1    0   	  -4.747251180293	   1.228225288497	   0.635177684475
30    1    0   	  -4.821626013370	  -0.349707675020	  -2.026524106125
31    1    0   	  -3.285399658348	   2.905417187518	  -0.536890684338
32    1    0   	  -3.091171061532	   1.760246077070	  -1.909878946122
33    6    0   	  -4.673691897713	  -1.374974543694	  -0.216393215279
34    1    0   	  -0.858814534528	  -1.807404610910	   2.022126969231
35    6    0   	  -4.528041085014	  -1.420307174595	   1.282438175077
36    1    0   	  -3.749010806129	  -2.136243674587	   1.568829292304
37    1    0   	  -4.288765595963	  -0.455370643073	   1.734151753491
38    1    0   	  -5.456681399244	  -1.779507670307	   1.738769555658
39    6    0   	  -4.820280591424	  -2.723563209790	  -0.868270610191
40    1    0   	  -5.685361967655	  -3.254011545013	  -0.456748153389
41    1    0   	  -4.948378934226	  -2.643936893245	  -1.949051082082
42    1    0   	  -3.943685686203	  -3.349859496859	  -0.665136183965
43    6    0   	  -1.922409240731	   1.557780820304	   1.300047060365
44    1    0   	  -2.576408271133	   2.361585928754	   1.637009887069
45    1    0   	  -1.933510819527	   0.716675661577	   1.999579741843
46    1    0   	  -0.866134038526	   1.905239241031	   1.289822206335
47    6    0   	   0.922713793480	   3.722237882495	  -0.287588528466
48    1    0   	   1.723566979148	   4.248701530710	  -0.819095841473
49    1    0   	   0.048358315511	   3.694790698025	  -0.941293698162
50    1    0   	   0.680538948904	   4.333890892097	   0.588143267276
51    6    0   	   1.693728929309	  -1.903472753580	   2.680337368155
52    1    0   	   1.057986237739	  -2.528402967214	   3.316846204653
53    1    0   	   2.702304680124	  -2.311997932881	   2.719911093030
54    1    0   	   1.711810127669	  -0.904956245344	   3.136303550131
55    6    0   	   3.276724782629	  -2.573953676178	   0.093718473481
56    6    0   	   4.004670927323	  -1.844948896154	  -1.042692894617
57    6    0   	   4.084878168142	  -0.332137078909	  -0.959111401970
58    1    0   	   3.326042355689	  -3.649706232132	  -0.113714728342
59    1    0   	   3.804067390696	  -2.419871814362	   1.038143641110
60    1    0   	   5.022995023380	  -2.244242356660	  -1.134770235835
61    1    0   	   3.511776016308	  -2.101206560385	  -1.991609849137
62    1    0   	   3.622070944612	  -0.234401832116	   1.071619719503
63    6    0   	   4.448903620844	   0.309031634171	  -2.272681305215
64    1    0   	   5.357777730097	  -0.151088526117	  -2.675442077508
65    1    0   	   3.659036434572	   0.137616705021	  -3.013647247617
66    1    0   	   4.624276237118	   1.381917185990	  -2.201434402249
---------------------------------------------------------------------
SCF Done:  E(scf) =  -976.591061150806     A.U.


IRC-IRC-IRC-IRC-IRC-IRC-IRC-IRC-IRC-IRC-IRC-IRC-IRC-IRC-IRC-IRC-IRC-IRC
Pt  69  Step number   1 out of a maximum of  2639
NET REACTION COORDINATE UP TO THIS POINT =    69.00000
IRC-IRC-IRC-IRC-IRC-IRC-IRC-IRC-IRC-IRC-IRC-IRC-IRC-IRC-IRC-IRC-IRC-IRC
                         Input orientation:
---------------------------------------------------------------------
Center     Atomic      Atomic             Coordinates (Angstroms)
Number     Number       Type             X           Y           Z
---------------------------------------------------------------------
1     6    0   	  -0.270346886922	  -1.253197381398	   1.268387614480
2     6    0   	   1.135941377369	  -1.831994744938	   1.281231865782
3     6    0   	   2.601260021337	   2.348160652640	   1.071984411270
4     6    0   	   1.836696160216	  -2.146650585075	   0.187870363959
5     6    0   	   3.894726610024	   1.823771906853	   0.399055831303
6     6    0   	   3.868716067876	   0.336492721741	   0.176133412455
7     1    0   	   2.383370017912	   1.714685308634	   1.941244317883
8     1    0   	   4.728545935301	   2.072308818586	   1.066703477390
9     1    0   	   2.782381326956	   3.357233650152	   1.453898202936
10    1    0   	   4.064021509315	   2.372003018325	  -0.531607842160
11    1    0   	   1.359586156517	  -2.050352486087	  -0.789022654660
12    6    0   	   0.896003673113	   1.193317668000	  -0.280342912161
13    1    0   	  -0.156530753970	  -0.241406371577	   1.674297208983
14    6    0   	   1.401714952252	   2.367129214340	   0.144832985374
15    1    0   	   1.379128380175	   0.291236377980	   0.077828769305
16    6    0   	  -1.450889929567	   0.093134597728	  -0.742287816148
17    6    0   	  -1.063632644106	  -1.231595556543	  -0.054018668574
18    6    0   	  -0.174948721343	   0.965669453512	  -1.278981259792
19    6    0   	  -2.199938989874	   1.136151453336	  -0.072707902581
20    1    0   	  -2.011430245767	  -1.758026816900	   0.091592629108
21    1    0   	  -0.540140180189	  -1.810653741940	  -0.819475926122
22    1    0   	  -1.987802559859	  -0.163866044106	  -1.660222713768
23    1    0   	  -0.526564586066	   1.876272780696	  -1.770102541995
24    1    0   	   0.191893514164	   0.297388073107	  -2.066687977356
25    6    0   	  -4.601149977774	   1.154761510502	  -0.437992826027
26    6    0   	  -4.700415199553	  -0.253935081930	  -0.945358942198
27    6    0   	  -3.237479546434	   1.855708353602	  -0.825298504723
28    1    0   	  -5.372833809836	   1.777384946620	  -0.900474089312
29    1    0   	  -4.747414955927	   1.222595430268	   0.642414378860
30    1    0   	  -4.827083151667	  -0.347536126003	  -2.023668200123
31    1    0   	  -3.293233491467	   2.906904285474	  -0.530743135799
32    1    0   	  -3.099477657179	   1.764282130441	  -1.905903686372
33    6    0   	  -4.670058933105	  -1.377886578188	  -0.217161048341
34    1    0   	  -0.860451530545	  -1.793634553160	   2.019553610457
35    6    0   	  -4.518744769951	  -1.427173945344	   1.280984191056
36    1    0   	  -3.738558290778	  -2.143737532098	   1.562548066145
37    1    0   	  -4.277857308592	  -0.463374446627	   1.734295935795
38    1    0   	  -5.445621007640	  -1.787640306758	   1.739916431119
39    6    0   	  -4.816235996302	  -2.724886784910	  -0.872380770254
40    1    0   	  -5.678622434918	  -3.258364402517	  -0.459113345836
41    1    0   	  -4.948610958538	  -2.642418949054	  -1.952431112072
42    1    0   	  -3.937565357845	  -3.349911389980	  -0.674373069785
43    6    0   	  -1.921705447561	   1.560817549503	   1.300665821887
44    1    0   	  -2.575531465000	   2.364073728025	   1.639265506215
45    1    0   	  -1.931524436334	   0.719255571523	   1.999688983608
46    1    0   	  -0.865710357365	   1.908548646338	   1.289232140258
47    6    0   	   0.915778050614	   3.724999139336	  -0.276630799183
48    1    0   	   1.713179158636	   4.256864210228	  -0.807949325992
49    1    0   	   0.038610285923	   3.700332175660	  -0.926681569148
50    1    0   	   0.676204622958	   4.330026100610	   0.604402654790
51    6    0   	   1.690570068780	  -1.898235209028	   2.680944950676
52    1    0   	   1.052432336711	  -2.520398957471	   3.317778558700
53    1    0   	   2.698234028006	  -2.308730331494	   2.723292537804
54    1    0   	   1.709866467657	  -0.898689109599	   3.134609956586
55    6    0   	   3.277046590925	  -2.577644695166	   0.098960616797
56    6    0   	   4.007550371175	  -1.851659484781	  -1.037803795768
57    6    0   	   4.087412663184	  -0.338636194114	  -0.957880505899
58    1    0   	   3.325674763449	  -3.653880043575	  -0.106062072232
59    1    0   	   3.802914241399	  -2.421924707931	   1.043941662908
60    1    0   	   5.026080368339	  -2.251165935152	  -1.126581094771
61    1    0   	   3.516729010919	  -2.110354412136	  -1.987130307784
62    1    0   	   3.619387979384	  -0.236042218657	   1.071408380656
63    6    0   	   4.454653411604	   0.299443353399	  -2.272048914170
64    1    0   	   5.364653505335	  -0.161458013852	  -2.671352340412
65    1    0   	   3.666730343743	   0.126113897234	  -3.014630124978
66    1    0   	   4.629679761800	   1.372523732765	  -2.202855365756
---------------------------------------------------------------------
SCF Done:  E(scf) =  -976.590996596208     A.U.


IRC-IRC-IRC-IRC-IRC-IRC-IRC-IRC-IRC-IRC-IRC-IRC-IRC-IRC-IRC-IRC-IRC-IRC
Pt  70  Step number   1 out of a maximum of  2639
NET REACTION COORDINATE UP TO THIS POINT =    70.00000
IRC-IRC-IRC-IRC-IRC-IRC-IRC-IRC-IRC-IRC-IRC-IRC-IRC-IRC-IRC-IRC-IRC-IRC
                         Input orientation:
---------------------------------------------------------------------
Center     Atomic      Atomic             Coordinates (Angstroms)
Number     Number       Type             X           Y           Z
---------------------------------------------------------------------
1     6    0   	  -0.269087716589	  -1.246062586867	   1.264086428995
2     6    0   	   1.135389529299	  -1.829202369088	   1.280692072218
3     6    0   	   2.601441569185	   2.346304512536	   1.069015135769
4     6    0   	   1.837310980412	  -2.148241763760	   0.189364927749
5     6    0   	   3.893681571897	   1.820690275086	   0.394965205273
6     6    0   	   3.868026898732	   0.332918863498	   0.175173345799
7     1    0   	   2.383694409980	   1.713088900852	   1.938558314262
8     1    0   	   4.728532062046	   2.070755690815	   1.060785732292
9     1    0   	   2.784262369641	   3.354992810538	   1.451124399637
10    1    0   	   4.061355627301	   2.367108250542	  -0.537060030877
11    1    0   	   1.362264720479	  -2.053892588645	  -0.788678371781
12    6    0   	   0.895321214348	   1.196107237844	  -0.287845786063
13    1    0   	  -0.151469538686	  -0.233044068580	   1.665727870836
14    6    0   	   1.399962443254	   2.367922865776	   0.144178728999
15    1    0   	   1.381001650720	   0.292091237589	   0.062267699816
16    6    0   	  -1.453350184046	   0.098276144764	  -0.744507179017
17    6    0   	  -1.060164020798	  -1.226372294427	  -0.059633661318
18    6    0   	  -0.179955911983	   0.974119402394	  -1.283128524187
19    6    0   	  -2.202049240491	   1.139425388454	  -0.071879674605
20    1    0   	  -2.005012320716	  -1.759006675006	   0.082641715061
21    1    0   	  -0.531849221767	  -1.799575642557	  -0.826152450746
22    1    0   	  -1.992103721633	  -0.158487601032	  -1.661397898009
23    1    0   	  -0.533697328510	   1.887386168874	  -1.767733982902
24    1    0   	   0.182925350450	   0.310017213978	  -2.076130587643
25    6    0   	  -4.604102511915	   1.152718430866	  -0.431804223057
26    6    0   	  -4.701930761969	  -0.254722702461	  -0.942854994411
27    6    0   	  -3.242974044881	   1.857641319410	  -0.821071100828
28    1    0   	  -5.378364264539	   1.775026049595	  -0.890390165682
29    1    0   	  -4.747554644169	   1.217249959879	   0.649197616240
30    1    0   	  -4.832168549836	  -0.345542811727	  -2.020975990842
31    1    0   	  -3.300602630054	   2.908265577902	  -0.524894973781
32    1    0   	  -3.107273717363	   1.768085820828	  -1.902127724311
33    6    0   	  -4.666583269870	  -1.380638209147	  -0.217904251930
34    1    0   	  -0.862056563624	  -1.781140430962	   2.016866124809
35    6    0   	  -4.509924790209	  -1.433619751751	   1.279571663853
36    1    0   	  -3.728580604184	  -2.150676262048	   1.556587923406
37    1    0   	  -4.267619198349	  -0.470863320379	   1.734370324720
38    1    0   	  -5.435087855642	  -1.795386418002	   1.740957223553
39    6    0   	  -4.812351209967	  -2.726145937418	  -0.876253647940
40    1    0   	  -5.672212619102	  -3.262468778172	  -0.461390201643
41    1    0   	  -4.948700321161	  -2.641029070451	  -1.955608480967
42    1    0   	  -3.931750724316	  -3.349957451182	  -0.683021567419
43    6    0   	  -1.921081817365	   1.563613723684	   1.301280345588
44    1    0   	  -2.574746919146	   2.366348963067	   1.641420915626
45    1    0   	  -1.929729939262	   0.721606863441	   1.999801815772
46    1    0   	  -0.865347866323	   1.911592910215	   1.288751688619
47    6    0   	   0.909368261045	   3.727591825915	  -0.266335886422
48    1    0   	   1.703523749895	   4.264465482200	  -0.797493467753
49    1    0   	   0.029546007208	   3.705500363838	  -0.912905944074
50    1    0   	   0.672297799687	   4.326439908865	   0.619605146060
51    6    0   	   1.687617243274	  -1.893073746194	   2.681470260818
52    1    0   	   1.047157848291	  -2.512386308087	   3.318770579699
53    1    0   	   2.694352368229	  -2.305572153697	   2.726472599423
54    1    0   	   1.708246220523	  -0.892465693384	   3.132751172789
55    6    0   	   3.277292964940	  -2.581126518821	   0.103908714650
56    6    0   	   4.010176439344	  -1.857990249323	  -1.033196332895
57    6    0   	   4.089707471869	  -0.344773918024	  -0.956726487521
58    1    0   	   3.325298109707	  -3.657815961958	  -0.098818616393
59    1    0   	   3.801767947205	  -2.423824236534	   1.049404404496
60    1    0   	   5.028898582271	  -2.257679220572	  -1.118880445293
61    1    0   	   3.521294882314	  -2.118994974416	  -1.982889968779
62    1    0   	   3.616822737178	  -0.237587897948	   1.071200214696
63    6    0   	   4.459939997031	   0.290383269656	  -2.271464368846
64    1    0   	   5.370969458544	  -0.171268761436	  -2.667542125055
65    1    0   	   3.673814200214	   0.115256977499	  -3.015523380096
66    1    0   	   4.634665640508	   1.363640968251	  -2.204220385145
---------------------------------------------------------------------
SCF Done:  E(scf) =  -976.590937111390     A.U.


IRC-IRC-IRC-IRC-IRC-IRC-IRC-IRC-IRC-IRC-IRC-IRC-IRC-IRC-IRC-IRC-IRC-IRC
Pt  71  Step number   1 out of a maximum of  2639
NET REACTION COORDINATE UP TO THIS POINT =    71.00000
IRC-IRC-IRC-IRC-IRC-IRC-IRC-IRC-IRC-IRC-IRC-IRC-IRC-IRC-IRC-IRC-IRC-IRC
                         Input orientation:
---------------------------------------------------------------------
Center     Atomic      Atomic             Coordinates (Angstroms)
Number     Number       Type             X           Y           Z
---------------------------------------------------------------------
1     6    0   	  -0.267627379800	  -1.237651256677	   1.258827042774
2     6    0   	   1.134690492668	  -1.825811445353	   1.280026231970
3     6    0   	   2.601743218781	   2.344171959411	   1.065354079666
4     6    0   	   1.837957180152	  -2.150271318067	   0.191211300028
5     6    0   	   3.892433541243	   1.816925598700	   0.389962427634
6     6    0   	   3.867118040604	   0.328572775323	   0.173992515176
7     1    0   	   2.384160819863	   1.711400039562	   1.935332919084
8     1    0   	   4.728550918112	   2.068785531178	   1.053543401396
9     1    0   	   2.786700279793	   3.352425973317	   1.447558791348
10    1    0   	   4.058182262956	   2.361105682948	  -0.543707226351
11    1    0   	   1.365330214139	  -2.058520958559	  -0.788181326855
12    6    0   	   0.894444577247	   1.199684150247	  -0.296838591199
13    1    0   	  -0.145679929063	  -0.223345324539	   1.655709001494
14    6    0   	   1.397904905595	   2.368956690075	   0.143395343579
15    1    0   	   1.383113776932	   0.293466494887	   0.043537998195
16    6    0   	  -1.456275068367	   0.104485432662	  -0.747165047149
17    6    0   	  -1.055844486346	  -1.220026126695	  -0.066543197507
18    6    0   	  -0.186010188703	   0.984472018962	  -1.287964390576
19    6    0   	  -2.204600715483	   1.143301808763	  -0.070849540686
20    1    0   	  -1.996956538980	  -1.760236231844	   0.071466460157
21    1    0   	  -0.521595090637	  -1.785830555989	  -0.834307419853
22    1    0   	  -1.997178239519	  -0.151977150034	  -1.662829836552
23    1    0   	  -0.542284781931	   1.900884979334	  -1.764571995082
24    1    0   	   0.172053839222	   0.325567173433	  -2.087312226266
25    6    0   	  -4.607625038403	   1.150172718459	  -0.424360440361
26    6    0   	  -4.703731319455	  -0.255732473905	  -0.939835216827
27    6    0   	  -3.249583512476	   1.859877868158	  -0.815924141712
28    1    0   	  -5.384955478003	   1.772056533160	  -0.878257501523
29    1    0   	  -4.747683119490	   1.210736698584	   0.657314264703
30    1    0   	  -4.838278756582	  -0.343244416596	  -2.017678942164
31    1    0   	  -3.309457638578	   2.909790745470	  -0.517763930253
32    1    0   	  -3.116654272676	   1.772594352199	  -1.897505225422
33    6    0   	  -4.662330881746	  -1.383950856189	  -0.218836209788
34    1    0   	  -0.864072837229	  -1.766582412392	   2.013206062843
35    6    0   	  -4.499183018779	  -1.441317230821	   1.277760879743
36    1    0   	  -3.716271802124	  -2.158716735087	   1.549265627431
37    1    0   	  -4.255415249466	  -0.479750979002	   1.734318927457
38    1    0   	  -5.422142168541	  -1.804921734102	   1.742105723406
39    6    0   	  -4.807567038229	  -2.727658157762	  -0.880926572596
40    1    0   	  -5.664324038968	  -3.267451395543	  -0.464166654639
41    1    0   	  -4.948726079852	  -2.639396491033	  -1.959392877686
42    1    0   	  -3.924648864117	  -3.349912119418	  -0.693458082658
43    6    0   	  -1.920397158097	   1.566883416574	   1.302066285363
44    1    0   	  -2.573889501534	   2.368967671579	   1.644058746343
45    1    0   	  -1.927662129283	   0.724323108965	   1.999953209026
46    1    0   	  -0.864993357701	   1.915188341777	   1.288277206612
47    6    0   	   0.901811852098	   3.730611567569	  -0.253832977716
48    1    0   	   1.692016661931	   4.273474049702	  -0.784740222754
49    1    0   	   0.018763794610	   3.711594956034	  -0.896067927664
50    1    0   	   0.667927578563	   4.321944448191	   0.637923016874
51    6    0   	   1.684095206522	  -1.886553381644	   2.682050764395
52    1    0   	   1.040712742623	  -2.502038143269	   3.320101292609
53    1    0   	   2.689568951295	  -2.301722747093	   2.730331853819
54    1    0   	   1.706660088794	  -0.884565191256	   3.130163434901
55    6    0   	   3.277500072848	  -2.585332561090	   0.109928094942
56    6    0   	   4.013197442263	  -1.865642159467	  -1.027604351505
57    6    0   	   4.092342951633	  -0.352214034325	  -0.955325618859
58    1    0   	   3.324796167137	  -3.662559899012	  -0.089999752500
59    1    0   	   3.800305598157	  -2.426057396220	   1.056014894622
60    1    0   	   5.032136373150	  -2.265523848541	  -1.109593157419
61    1    0   	   3.526621870108	  -2.129455553747	  -1.977694217883
62    1    0   	   3.613671704541	  -0.239460682835	   1.070925186168
63    6    0   	   4.466149001615	   0.279401580535	  -2.270737953359
64    1    0   	   5.378407470389	  -0.183117586413	  -2.662924126452
65    1    0   	   3.682185489535	   0.102068035336	  -3.016533267288
66    1    0   	   4.640488045593	   1.352870056014	  -2.205873762854
---------------------------------------------------------------------
SCF Done:  E(scf) =  -976.590866662640     A.U.


IRC-IRC-IRC-IRC-IRC-IRC-IRC-IRC-IRC-IRC-IRC-IRC-IRC-IRC-IRC-IRC-IRC-IRC
Pt  72  Step number   1 out of a maximum of  2639
NET REACTION COORDINATE UP TO THIS POINT =    72.00000
IRC-IRC-IRC-IRC-IRC-IRC-IRC-IRC-IRC-IRC-IRC-IRC-IRC-IRC-IRC-IRC-IRC-IRC
                         Input orientation:
---------------------------------------------------------------------
Center     Atomic      Atomic             Coordinates (Angstroms)
Number     Number       Type             X           Y           Z
---------------------------------------------------------------------
1     6    0   	  -0.266442526019	  -1.230519197633	   1.254260269794
2     6    0   	   1.134061052288	  -1.822894252695	   1.279459068939
3     6    0   	   2.602097566644	   2.342386372577	   1.062190636487
4     6    0   	   1.838472885895	  -2.152148792213	   0.192841292005
5     6    0   	   3.891395945450	   1.813661263152	   0.385610868276
6     6    0   	   3.866291463548	   0.324806197956	   0.172961617012
7     1    0   	   2.384667987093	   1.710041499198	   1.932579083558
8     1    0   	   4.728645976430	   2.067038572313	   1.047222165235
9     1    0   	   2.788946535618	   3.350273719445	   1.444430997226
10    1    0   	   4.055473278147	   2.355890414982	  -0.549489778613
11    1    0   	   1.367905253868	  -2.062813243296	  -0.787711888767
12    6    0   	   0.893674335918	   1.202832655819	  -0.304496677585
13    1    0   	  -0.140874696386	  -0.215139161635	   1.647171188301
14    6    0   	   1.396198537637	   2.369908830026	   0.142753437793
15    1    0   	   1.384893392258	   0.294680911975	   0.027454044244
16    6    0   	  -1.458800762991	   0.109842298225	  -0.749447960740
17    6    0   	  -1.052060867566	  -1.214584791058	  -0.072607225161
18    6    0   	  -0.191266216367	   0.993532429761	  -1.292029406991
19    6    0   	  -2.206827905617	   1.146597650429	  -0.069925837167
20    1    0   	  -1.989904494831	  -1.761462060898	   0.061532464635
21    1    0   	  -0.512537848152	  -1.773833203515	  -0.841462304526
22    1    0   	  -2.001515942081	  -0.146312056048	  -1.664093279376
23    1    0   	  -0.549769137861	   1.912706476317	  -1.761616448243
24    1    0   	   0.162632378064	   0.339214600750	  -2.096944558711
25    6    0   	  -4.610678125894	   1.147966536034	  -0.417991054832
26    6    0   	  -4.705274416744	  -0.256621051461	  -0.937277331342
27    6    0   	  -3.255286154603	   1.861786097889	  -0.811474327052
28    1    0   	  -5.390650900566	   1.769481323911	  -0.867867887459
29    1    0   	  -4.747843739740	   1.205103138984	   0.664264074650
30    1    0   	  -4.843558121151	  -0.341286810543	  -2.014881041667
31    1    0   	  -3.317086498127	   2.911082754540	  -0.511589697781
32    1    0   	  -3.124696668105	   1.776484307476	  -1.893505517461
33    6    0   	  -4.658601451574	  -1.386819377458	  -0.219675938728
34    1    0   	  -0.865913476146	  -1.754286766897	   2.009905832852
35    6    0   	  -4.489847796020	  -1.447937862890	   1.276164431225
36    1    0   	  -3.705481581572	  -2.165511448378	   1.542926650511
37    1    0   	  -4.244978153150	  -0.487362286736	   1.734246474622
38    1    0   	  -5.410853753745	  -1.813262681440	   1.743047738631
39    6    0   	  -4.803339737287	  -2.728989367956	  -0.884969887093
40    1    0   	  -5.657315361872	  -3.271851976073	  -0.466465251556
41    1    0   	  -4.948789830790	  -2.638032043862	  -1.962651417243
42    1    0   	  -3.918345156259	  -3.349821668124	  -0.702581534952
43    6    0   	  -1.919884896579	   1.569614672342	   1.302807395532
44    1    0   	  -2.573247377693	   2.371125039976	   1.646389106292
45    1    0   	  -1.926003111575	   0.726556732215	   2.000120562917
46    1    0   	  -0.864768926815	   1.918206033201	   1.287997147700
47    6    0   	   0.895428269771	   3.733301694246	  -0.243035802374
48    1    0   	   1.682205173032	   4.281244618441	  -0.773850673256
49    1    0   	   0.009515696754	   3.716991623362	  -0.881417883326
50    1    0   	   0.664457555815	   4.318197955723	   0.653753536303
51    6    0   	   1.681097080861	  -1.880690371064	   2.682541766021
52    1    0   	   1.035127480361	  -2.492620728578	   3.321436185448
53    1    0   	   2.685424267439	  -2.298327418939	   2.733681700730
54    1    0   	   1.705527734585	  -0.877396619654	   3.127673631477
55    6    0   	   3.277662654178	  -2.588995676096	   0.115165438783
56    6    0   	   4.015703812573	  -1.872276362234	  -1.022787493210
57    6    0   	   4.094521105550	  -0.358666273469	  -0.954130706204
58    1    0   	   3.324415120753	  -3.666693021508	  -0.082300322022
59    1    0   	   3.799038496827	  -2.427932332303	   1.061740902596
60    1    0   	   5.034830442737	  -2.272313323632	  -1.101663772100
61    1    0   	   3.531052849317	  -2.138512098110	  -1.973188313672
62    1    0   	   3.610921766483	  -0.241069310774	   1.070695254065
63    6    0   	   4.471366454531	   0.269889605717	  -2.270141679773
64    1    0   	   5.384660013664	  -0.193382378723	  -2.659017457867
65    1    0   	   3.689229759389	   0.090672952139	  -3.017395395437
66    1    0   	   4.645388095228	   1.343536335843	  -2.207335421814
---------------------------------------------------------------------
SCF Done:  E(scf) =  -976.590806871518     A.U.


IRC-IRC-IRC-IRC-IRC-IRC-IRC-IRC-IRC-IRC-IRC-IRC-IRC-IRC-IRC-IRC-IRC-IRC
Pt  73  Step number   1 out of a maximum of  2639
NET REACTION COORDINATE UP TO THIS POINT =    73.00000
IRC-IRC-IRC-IRC-IRC-IRC-IRC-IRC-IRC-IRC-IRC-IRC-IRC-IRC-IRC-IRC-IRC-IRC
                         Input orientation:
---------------------------------------------------------------------
Center     Atomic      Atomic             Coordinates (Angstroms)
Number     Number       Type             X           Y           Z
---------------------------------------------------------------------
1     6    0   	  -0.265294285882	  -1.223479977457	   1.249603224854
2     6    0   	   1.133395412567	  -1.819957864478	   1.278860460193
3     6    0   	   2.602510563563	   2.340697285398	   1.058999929854
4     6    0   	   1.838907410531	  -2.154155202132	   0.194492951150
5     6    0   	   3.890312864819	   1.810340287089	   0.381150367487
6     6    0   	   3.865330062314	   0.320984516539	   0.171872437182
7     1    0   	   2.385238833698	   1.708853236852	   1.929854093760
8     1    0   	   4.728768347850	   2.065194362994	   1.040699355598
9     1    0   	   2.791374195030	   3.348222813920	   1.441192657582
10    1    0   	   4.052684394678	   2.350562715803	  -0.555406665833
11    1    0   	   1.370357260179	  -2.067471960569	  -0.787204173368
12    6    0   	   0.892801377197	   1.206213399034	  -0.312005223813
13    1    0   	  -0.136250604455	  -0.207150508653	   1.638792003387
14    6    0   	   1.394515401177	   2.370998611041	   0.142168946382
15    1    0   	   1.386435472569	   0.296222316643	   0.011629315275
16    6    0   	  -1.461297885162	   0.115272280316	  -0.751730321326
17    6    0   	  -1.048171929708	  -1.209057909077	  -0.078811639788
18    6    0   	  -0.196524476644	   1.002756980796	  -1.295944895316
19    6    0   	  -2.209092067956	   1.149863859488	  -0.068943378070
20    1    0   	  -1.982613383190	  -1.762663428077	   0.051285342644
21    1    0   	  -0.503304637836	  -1.761501428244	  -0.848741739920
22    1    0   	  -2.005772272769	  -0.140535908283	  -1.665389954658
23    1    0   	  -0.557202197178	   1.924613931250	  -1.758510129200
24    1    0   	   0.153273810407	   0.353091146190	  -2.106326371472
25    6    0   	  -4.613732998796	   1.145675089737	  -0.411596779843
26    6    0   	  -4.706773814839	  -0.257570609338	  -0.934713439694
27    6    0   	  -3.261023319517	   1.863659350816	  -0.806917280086
28    1    0   	  -5.396328846379	   1.766774224594	  -0.857464995614
29    1    0   	  -4.748026079963	   1.199376798476	   0.671205105391
30    1    0   	  -4.848785932574	  -0.339402789252	  -2.012045189549
31    1    0   	  -3.324776567325	   2.912306173309	  -0.505229507018
32    1    0   	  -3.132772376097	   1.780409594670	  -1.889389066047
33    6    0   	  -4.654776029723	  -1.389720608211	  -0.220562700047
34    1    0   	  -0.867828832358	  -1.742276209969	   2.006280420210
35    6    0   	  -4.480354647266	  -1.454588065434	   1.274466755089
36    1    0   	  -3.694295877148	  -2.172062138993	   1.536419776459
37    1    0   	  -4.234684603597	  -0.494939647586	   1.734086435613
38    1    0   	  -5.399248837732	  -1.821988997947	   1.743897636161
39    6    0   	  -4.798960241256	  -2.730335902979	  -0.889079232131
40    1    0   	  -5.650227522480	  -3.276241151476	  -0.469004040932
41    1    0   	  -4.948517639740	  -2.636696315814	  -1.965968703657
42    1    0   	  -3.911968874753	  -3.349746570493	  -0.711623510195
43    6    0   	  -1.919470021711	   1.572235598758	   1.303636239457
44    1    0   	  -2.572759159610	   2.373102833671	   1.648851148996
45    1    0   	  -1.924395049250	   0.728634112003	   2.000314633829
46    1    0   	  -0.864672032663	   1.921200542787	   1.287843247521
47    6    0   	   0.889260612857	   3.736008601021	  -0.232252996235
48    1    0   	   1.672701346025	   4.288938198100	  -0.762825137300
49    1    0   	   0.000583712421	   3.722379841444	  -0.866850106689
50    1    0   	   0.661169173275	   4.314497238026	   0.669418408948
51    6    0   	   1.678124387428	  -1.874532963349	   2.682977103495
52    1    0   	   1.029300168811	  -2.482251109395	   3.322955724586
53    1    0   	   2.681037206515	  -2.295131832477	   2.737123160726
54    1    0   	   1.705008961027	  -0.869814242573	   3.124719987556
55    6    0   	   3.277749151895	  -2.592715018677	   0.120469857238
56    6    0   	   4.018111393338	  -1.878990554076	  -1.017915365407
57    6    0   	   4.096572102615	  -0.365206567993	  -0.952945907756
58    1    0   	   3.323997289109	  -3.670879877267	  -0.074489018845
59    1    0   	   3.797679123080	  -2.429793633745	   1.067522421368
60    1    0   	   5.037427965409	  -2.279142506265	  -1.093654494016
61    1    0   	   3.535399397929	  -2.147713155992	  -1.968600201467
62    1    0   	   3.608033507747	  -0.242700055262	   1.070410376220
63    6    0   	   4.476494617366	   0.260227753627	  -2.269552433967
64    1    0   	   5.390910907051	  -0.203702188670	  -2.654984343192
65    1    0   	   3.696282610230	   0.078948612686	  -3.018309419125
66    1    0   	   4.650054622329	   1.334076430930	  -2.208883742889
---------------------------------------------------------------------
SCF Done:  E(scf) =  -976.590747736844     A.U.


IRC-IRC-IRC-IRC-IRC-IRC-IRC-IRC-IRC-IRC-IRC-IRC-IRC-IRC-IRC-IRC-IRC-IRC
Pt  74  Step number   1 out of a maximum of  2639
NET REACTION COORDINATE UP TO THIS POINT =    74.00000
IRC-IRC-IRC-IRC-IRC-IRC-IRC-IRC-IRC-IRC-IRC-IRC-IRC-IRC-IRC-IRC-IRC-IRC
                         Input orientation:
---------------------------------------------------------------------
Center     Atomic      Atomic             Coordinates (Angstroms)
Number     Number       Type             X           Y           Z
---------------------------------------------------------------------
1     6    0   	  -0.264162307485	  -1.216600661347	   1.244974611069
2     6    0   	   1.132738952113	  -1.817053240834	   1.278274962205
3     6    0   	   2.602988712008	   2.339119052600	   1.055822288048
4     6    0   	   1.839285176955	  -2.156253750188	   0.196163290771
5     6    0   	   3.889236896874	   1.807032635130	   0.376677686058
6     6    0   	   3.864293219765	   0.317186093319	   0.170759866939
7     1    0   	   2.385881828525	   1.707846708282	   1.927194456200
8     1    0   	   4.728930937421	   2.063304725423	   1.034131839004
9     1    0   	   2.793924859322	   3.346300467580	   1.437881332397
10    1    0   	   4.049911589290	   2.345236106775	  -0.561330370058
11    1    0   	   1.372669968886	  -2.072377105499	  -0.786637727603
12    6    0   	   0.891893359868	   1.209699586040	  -0.319304437886
13    1    0   	  -0.131757174583	  -0.199391491319	   1.630595312802
14    6    0   	   1.392892004598	   2.372168369345	   0.141633726283
15    1    0   	   1.387850849482	   0.297950387953	  -0.003852527187
16    6    0   	  -1.463726252031	   0.120631041550	  -0.753967355551
17    6    0   	  -1.044252269553	  -1.203590428577	  -0.084997089804
18    6    0   	  -0.201719697798	   1.011977493498	  -1.299674318907
19    6    0   	  -2.211342469849	   1.153017626752	  -0.067938506989
20    1    0   	  -1.975272386360	  -1.763863191539	   0.041019488287
21    1    0   	  -0.494073214804	  -1.749196401033	  -0.855975353038
[truncated: 10,944,640 more chars]
